# Supplementary material
Source: PubMed Central journal article supplement (PMC3430533)
Supplement: supp_112.142687_142687SI.pdf [file supp_112.142687_142687SI.pdf]

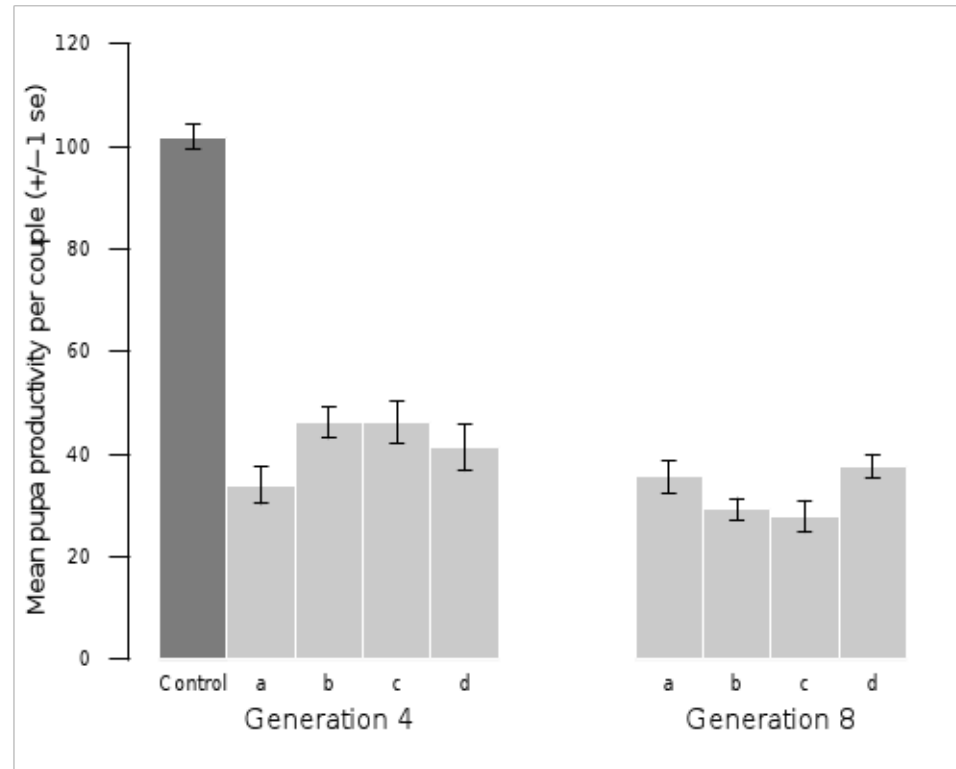

**Figure S1** Mean pupa productivity for the four inbred lines and the outbred control at generations 4 and 8. At generation 4, the rate of inbreeding depression was 1.14, 1.02, 0.97 and 1.12% per 1% increased in inbreeding for lines *a*, *b*, *c* and *d*, respectively.

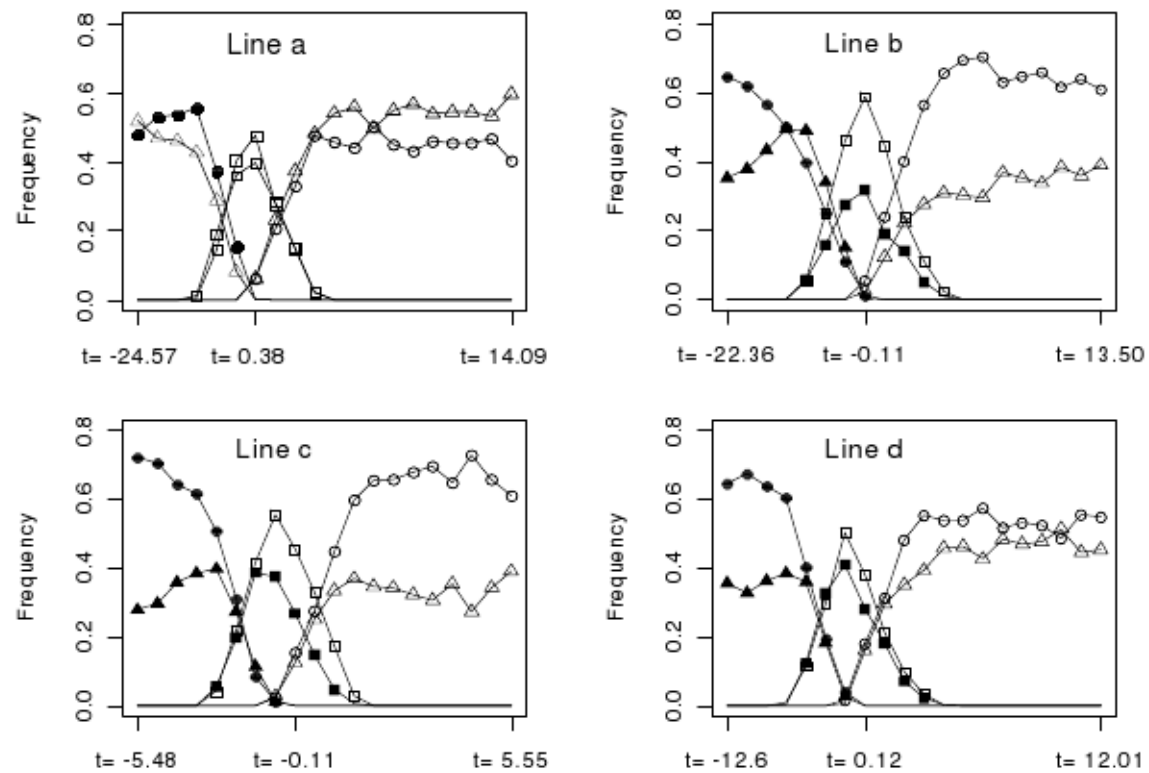

**Figure S2** Relative frequencies of probe sets in each of the gene expression profiles shown in Figure 5 of the main text for each inbred line. We ranked the 9133 expressed probe sets according to their Student's  $t$  value in the inbreds vs. control test, and divided the rank in 20 tiers of size 456 (except the last one, of size 469). Thus, the right-hand part of the figure includes probes up-regulated with inbreeding, and those in the left-hand side are probes down-regulated with inbreeding.

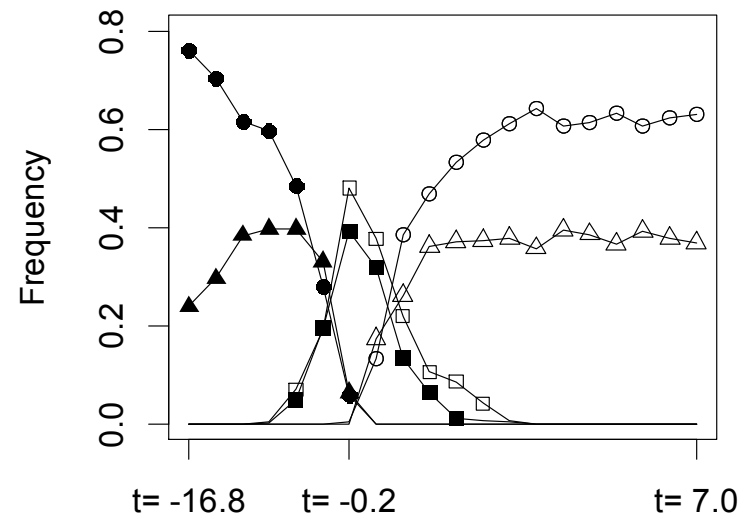

**Figure S3** Relative frequencies of probe sets in each of the gene expression profiles shown in Figure 5 of the main text for each inbred line. Profiles in this figure correspond to raw gene expressions, i.e., the average of the perfect match probes in each probe set. We ranked the 9133 expressed probe sets according to their Student's  $t$  value in the inbreds vs. control test, and divided the rank in 20 tiers of size 456 (except the last one, of size 469). Thus, the right-hand part of the figure includes probes up-regulated with inbreeding, and those in the left-hand side are probes down-regulated with inbreeding.

**Table S1**

| Category                                         | Cluster             | Classification  | Term's name                                          | Number of genes |
|--------------------------------------------------|---------------------|-----------------|------------------------------------------------------|-----------------|
| Inbreds up-regulated, protective configuration   | Cluster 1, ES: 2.25 | GOTERM_BP_FAT   | RNA processing                                       | 60              |
|                                                  |                     | KEGG_PATHWAY    | Spliceosome                                          | 40              |
|                                                  |                     | GOTERM_CC_FAT   | Small nuclear ribonucleoprotein complex              | 22              |
|                                                  | Cluster 2: ES: 2.04 | GOTERM_BP_FAT   | RNA localization                                     | 20              |
|                                                  |                     | GOTERM_BP_FAT   | Nucleocytoplasmic transport                          | 19              |
|                                                  |                     | GOTERM_BP_FAT   | mRNA export from nucleus                             | 11              |
|                                                  | Cluster 3: ES: 1.76 | GOTERM_CC_FAT   | Extracellular region                                 | 46              |
|                                                  |                     | UP_SEQ_FEATURE  | Signal peptide                                       | 44              |
|                                                  |                     | SP_PIR_KEYWORDS | Glycoprotein                                         | 25              |
|                                                  | Cluster 4, ES: 1.44 | GOTERM_BP_FAT   | Cell surface receptor linked signal transduction     | 24              |
|                                                  |                     | GOTERM_MF_FAT   | Hormone activity                                     | 16              |
|                                                  |                     | GOTERM_BP_FAT   | G-protein coupled receptor protein signaling pathway | 11              |
| Inbreds down-regulated, protective configuration | Cluster 1, ES: 2.36 | GOTERM_BP_FAT   | Phosphate metabolic process                          | 121             |
|                                                  |                     | GOTERM_CC_FAT   | Mitochondrion                                        | 116             |
|                                                  |                     | GOTERM_BP_FAT   | Energy derivation by oxidation of organic compounds  | 55              |
|                                                  | Cluster 2, ES: 2.03 | GOTERM_MF_FAT   | Nucleotide binding                                   | 149             |
|                                                  |                     | GOTERM_MF_FAT   | ATP binding                                          | 101             |
|                                                  |                     | INTERPRO        | Protein kinase, ATP binding site                     | 40              |
|                                                  | Cluster 3, ES: 1.44 | GOTERM_BP_FAT   | Protein amino acid phosphorylation                   | 50              |
|                                                  |                     | INTERPRO        | Serine/threonine protein kinase-related              | 35              |
|                                                  |                     | UP_SEQ_FEATURE  | Active site:Proton acceptor                          | 25              |

**Table S1 (cont.)**

|                                                    |                     |          |                         |   |
|----------------------------------------------------|---------------------|----------|-------------------------|---|
| Inbreds up-regulated, non-protective configuration | Cluster 1, ES: 1.35 | SMART    | JHBP                    | 5 |
|                                                    |                     | INTERPRO | Hormone binding         | 5 |
|                                                    |                     | INTERPRO | Odorant binding protein | 5 |

Cluster annotation analysis of the probe sets showing the most extreme Student's *t* values in the test of inbreds' vs. controls' expression (1846 and 1860 probes for the positive and negative *t* values respectively), using as background all probes in the same expression pattern. The lists of functional terms shown are not exhaustive, we chose three informative and less redundant terms in each cluster. No significant clusters were found in the analysis of down-regulated probes having non-protective configurations. ES: Enrichment Score.

**Table S2 Comparison with Kristensen et al gene lists**

|                   | Number of probe sets in the Kristensen et al. list | Correspondences in our platform | Expressed in this experiment | <i>Inb</i> effects OBS | <i>Inb</i> effects EXP | <i>Inb</i> same dir. OBS | <i>Inb</i> same dir. EXP | <i>Dep</i> effects OBS | <i>Dep</i> effects EXP | <i>Dep</i> same dir. OBS | <i>Dep</i> same dir. EXP |
|-------------------|----------------------------------------------------|---------------------------------|------------------------------|------------------------|------------------------|--------------------------|--------------------------|------------------------|------------------------|--------------------------|--------------------------|
| Fast+             | 60                                                 | 38                              | 35                           | 14                     | 14.70                  | 13                       | 9.8                      | 4                      | 5.60                   | 2                        | 2.80                     |
| Fast-             | 13                                                 | 15                              | 11                           | 4                      | 4.62                   | 3                        | 1.2                      | 4                      | 1.76                   | 2                        | 1.20                     |
| Slow+             | 113                                                | 76                              | 69                           | 42                     | 28.98                  | 32                       | 29.4                     | 12                     | 11.4                   | 5                        | 8.40                     |
| Slow-             | 41                                                 | 20                              | 19                           | 7                      | 7.98                   | 4                        | 2.1                      | 4                      | 3.04                   | 3                        | 1.20                     |
| Joint+            | 9                                                  | 9                               | 8                            | 5                      | 3.36                   | 4                        | 3.5                      | 3                      | 1.28                   | 2                        | 2.10                     |
| Joint-            | 12                                                 | 12                              | 12                           | 9                      | 5.04                   | 8                        | 2.7                      | 2                      | 1.92                   | 1                        | 0.60                     |
| 25 <sup>a</sup> + | 5                                                  | 5                               | 5                            | 3                      | 2.10                   | 2                        | 2.1                      | 2                      | 0.80                   | 1                        | 1.40                     |
| 25 <sup>a</sup> - | 7                                                  | 7                               | 7                            | 5                      | 2.94                   | 1                        | 1.5                      | 1                      | 1.12                   | 0                        | 0.3                      |
| Total             | <b>260</b>                                         | <b>182</b>                      | <b>166</b>                   | <b>89</b>              | <b>69.72</b>           | <b>67</b>                | <b>52.3</b>              | <b>32</b>              | <b>26.92</b>           | <b>16</b>                | <b>18</b>                |
| $\chi^2$ (7 d.f.) |                                                    |                                 |                              | 5.09, P = 0.649        |                        | 9.53, P = 0.217          |                          | 5.73, P = 0.572        |                        | 5.96, P = 0.544          |                          |

*Inb* and *Dep* effects for the probe sets listed as SAM-selected in the Fast and Slow inbreeding treatments and the Joint analysis in Kristensen et al. [2005] and in the 25°C treatment in Kristensen et al. [2006]. Plus and minus signs indicate over and down regulated probe sets in the inbred samples, respectively. Because their results correspond to the older Affymetrix Drosophila Genome Array Version 1, we show the number of equivalent probe sets in our Version 2 Array (note that the equivalences were not one to one); of these, the number expressed in the current experiment; the number of *Inb* or *Dep* significant, and the number showing these effects in the same direction. The expected numbers of probe sets showing *Inb* and *Dep* effects were calculated as: number of Kristensen et al.'s SAM-selected probe sets expressed in our experiment × our overall proportion of probe sets showing *Inb* or *Dep* effects (0.42 and 0.16). The expected counts in the same direction were calculated as: number of expressed probe sets showing *Inb* or *Dep* effects × overall proportion of up or down regulated genes in our experiment (0.7 and 0.3 for *Inb* and 0.41 and 0.59 for *Dep*).

**Table S3 Comparison with Sorensen et al. gene lists**

| Selected line            | In Sorensen's list | Expressed in this experiment | <i>Inb</i> effects         |        | <i>Inb</i> same dir.       |       | <i>Dep</i> effects          |       | <i>Dep</i> same dir.       |       |
|--------------------------|--------------------|------------------------------|----------------------------|--------|----------------------------|-------|-----------------------------|-------|----------------------------|-------|
|                          |                    |                              | OBS                        | EXP    | OBS                        | EXP   | OBS                         | EXP   | OBS                        | EXP   |
| Heat survival            | 94                 | 78                           | 28                         | 33.12  | 6                          | -     | 12                          | 12.76 | 5                          |       |
| Starvation               | 230                | 176                          | 74                         | 74.73  | 19                         | 22.20 | 20                          | 28.80 | 12                         | 11.80 |
| Longevity                | 64                 | 54                           | 27                         | 22.92  | 8                          | 8.10  | 9                           | 8.83  | 2                          | 5.31  |
| Heat knock down          | 21                 | 16                           | 4                          | 6.79   | 3                          | 2.80  | 8                           | 2.62  | 8                          | 3.28  |
| Dessication              | 262                | 154                          | 53                         | 65.39  | 20                         | 15.9  | 21                          | 25.20 | 11                         | 12.39 |
| Constant 30° C           | 12                 | 10                           | 4                          | 4.25   | 2                          | 3.00  | 0                           | 1.64  | 0                          | -     |
| Combined                 | 262                | 245                          | 108                        | 104.03 | 51                         | 75.6  | 46                          | 40.08 | 24                         | 18.86 |
| Goodness-of-fit $\chi^2$ |                    |                              | 4.82, $P = 0.566$ , 6 d.f. |        | 6.35, $P = 0.273$ , 5 d.f. |       | 17.44, $P = 0.008$ , 6 d.f. |       | 8.93, $P = 0.063$ , 4 d.f. |       |

Numbers of genes differentially expressed in the Sorensen et al. (2003) stress selection lines; number of these genes expressed in our experiment (only the counts in the *Inb* analysis lists are shown; the counts difference with the *Dep* analysis lists was never greater than two); of these, numbers showing *Inb* or *Dep* effects ( $P < 0.05$  in *t* test and ANOVA respectively); of these, numbers with expression changed in the same direction as in the Sorensen's et al experiment. The expected numbers of *Inb* and *Dep* effects genes were calculated as: number of Sorensen's et al. significant genes expressed in this experiment  $\times$  our overall proportion of genes showing *Inb* or *Dep* effects (0.42 and 0.16). The expected counts in the same direction were calculated using the number of expressed genes with *Inb* or *Dep* effects  $\times$  overall proportion of up- or down-regulated genes in our experiment (0.7 and 0.3 for *Inb* and 0.41 and 0.59 for *Dep*). All genes in each selected line list showed changes in the same direction, with the exception of Heat survival, for which we calculated no expected direction changes. Combined: genes differentially expressed in a joint analysis of all selected lines versus controls in Sorensen's et al. experiment.

File S1

Lists of probe sets showing (FDR<0.1) *Inb*, *Lin*, *Dep* and *Lin x Dep* effects

\*\*\*\*\*

**Inb Effects UP regulated FDR < 0.1**

|            |              |              |              |              |              |
|------------|--------------|--------------|--------------|--------------|--------------|
| 1635494_at | 1625828_at   | 1629101_a_at | 1633357_at   | 1623191_at   | 1628376_x_at |
| 1633048_at | 1636885_at   | 1639914_at   | 1624079_a_at | 1626789_at   | 1633410_at   |
| 1627088_at | 1638742_at   | 1637390_at   | 1641434_at   | 1631099_at   | 1631173_at   |
| 1631523_at | 1640979_at   | 1638827_at   | 1623327_at   | 1639528_at   | 1635848_at   |
| 1623935_at | 1634935_a_at | 1639262_at   | 1640221_at   | 1634551_at   | 1625125_at   |
| 1638090_at | 1640144_at   | 1628020_at   | 1632908_s_at | 1627631_s_at | 1633613_at   |
| 1624914_at | 1629014_s_at | 1628657_at   | 1633005_at   | 1628006_at   | 1635318_at   |
| 1633844_at | 1623018_at   | 1633586_at   | 1623866_at   | 1635088_at   | 1639188_at   |
| 1629050_at | 1640157_at   | 1641502_a_at | 1631290_at   | 1626699_at   | 1625503_at   |
| 1637290_at | 1623900_a_at | 1636764_at   | 1634529_at   | 1628814_s_at | 1634207_at   |
| 1628639_at | 1630516_at   | 1631246_at   | 1633363_at   | 1638166_at   | 1631876_at   |
| 1640956_at | 1623521_at   | 1632259_at   | 1635251_at   | 1629205_at   | 1634687_at   |
| 1635008_at | 1626266_at   | 1638887_a_at | 1623355_at   | 1640230_at   | 1625367_at   |
| 1630761_at | 1627312_at   | 1636856_at   | 1637567_at   | 1632298_s_at | 1628599_at   |
| 1627529_at | 1627667_at   | 1639108_at   | 1629061_s_at | 1623335_a_at | 1639932_at   |
| 1627419_at | 1634243_a_at | 1626605_at   | 1629771_at   | 1636660_at   | 1636108_at   |



|              |            |              |              |              |              |
|--------------|------------|--------------|--------------|--------------|--------------|
| 1625315_at   | 1625763_at | 1638193_at   | 1628884_at   | 1638167_at   | 1627117_a_at |
| 1637063_at   | 1636526_at | 1623659_at   | 1631813_at   | 1632067_at   | 1637291_at   |
| 1636888_a_at | 1630975_at | 1623250_at   | 1636842_at   | 1639397_at   | 1638481_at   |
| 1637754_at   | 1628338_at | 1629220_at   | 1627773_a_at | 1634731_at   | 1640400_at   |
| 1630795_at   | 1641491_at | 1638164_at   | 1631837_at   | 1638630_at   | 1635649_at   |
| 1629977_at   | 1630831_at | 1632274_at   | 1628505_at   | 1630845_at   | 1623298_at   |
| 1628831_at   | 1632452_at | 1630574_at   | 1631816_at   | 1634157_at   | 1636220_at   |
| 1636482_at   | 1639563_at | 1634384_at   | 1634180_s_at | 1627595_at   | 1627380_at   |
| 1639981_at   | 1640950_at | 1639048_a_at | 1637462_at   | 1629662_at   | 1635945_at   |
| 1638585_at   | 1637667_at | 1641123_at   | 1630808_at   | 1627062_s_at | 1625634_at   |
| 1637160_at   | 1639401_at | 1624130_at   | 1641259_at   | 1637432_at   | 1637940_s_at |
| 1635935_at   | 1628271_at | 1632396_at   | 1629222_at   | 1629942_at   | 1624057_at   |
| 1626051_at   | 1635183_at | 1625410_at   | 1636705_at   | 1631775_at   | 1627327_at   |
| 1628719_at   | 1635030_at | 1623599_at   | 1641513_at   | 1627590_at   | 1626263_at   |
| 1632007_at   | 1633283_at | 1640356_a_at | 1638161_at   | 1639850_at   | 1641234_at   |
| 1627489_a_at | 1630299_at | 1636343_at   | 1634854_at   | 1628567_at   | 1627664_a_at |
| 1638654_at   | 1640158_at | 1636950_at   | 1633549_s_at | 1623194_at   | 1634817_at   |
| 1637367_at   | 1641567_at | 1630049_at   | 1624986_at   | 1633639_at   | 1623989_at   |
| 1623675_at   | 1641718_at | 1627124_at   | 1634664_at   | 1636929_at   | 1631719_at   |
| 1628969_s_at | 1627119_at | 1636804_at   | 1632917_at   | 1638256_at   | 1636131_at   |
| 1640520_at   | 1640424_at | 1624354_at   | 1640689_a_at | 1632689_at   | 1623076_at   |

|            |              |              |              |              |              |
|------------|--------------|--------------|--------------|--------------|--------------|
| 1641552_at | 1635137_a_at | 1625260_at   | 1634849_at   | 1637224_at   | 1633961_s_at |
| 1627634_at | 1630557_at   | 1638038_at   | 1631660_at   | 1626203_at   | 1623453_at   |
| 1641584_at | 1637300_at   | 1632721_at   | 1632958_a_at | 1635098_a_at | 1633861_at   |
| 1635744_at | 1627465_at   | 1638516_s_at | 1632515_a_at | 1624152_at   | 1638774_at   |
| 1631381_at | 1640161_at   | 1623481_at   | 1638342_at   | 1630214_a_at | 1631827_at   |
| 1632490_at | 1628514_at   | 1639052_a_at | 1627817_at   | 1625840_at   | 1637717_at   |
| 1623105_at | 1636420_at   | 1635530_at   | 1628611_at   | 1631351_s_at | 1625058_at   |
| 1625962_at | 1640249_at   | 1627027_at   | 1638455_at   | 1634055_at   | 1634569_at   |
| 1631729_at | 1635506_at   | 1624090_at   | 1632391_at   | 1631787_at   | 1637571_at   |
| 1623430_at | 1632752_at   | 1625430_at   | 1627399_at   | 1640194_a_at | 1641108_at   |
| 1631674_at | 1635086_at   | 1627609_at   | 1628610_at   | 1627782_at   | 1624468_a_at |
| 1627330_at | 1631390_at   | 1628572_s_at | 1623906_at   | 1625963_at   | 1626557_at   |
| 1628446_at | 1640103_s_at | 1636129_s_at | 1630797_at   | 1623384_at   | 1626350_at   |
| 1628560_at | 1637799_at   | 1629518_at   | 1639273_s_at | 1638233_at   | 1639046_at   |
| 1626785_at | 1628883_at   | 1640056_at   | 1627939_a_at | 1632828_at   | 1634449_at   |
| 1636912_at | 1624074_at   | 1641137_at   | 1636174_at   | 1630640_at   | 1624935_at   |
| 1641454_at | 1641371_at   | 1634542_at   | 1636486_at   | 1626909_at   | 1640748_at   |
| 1627897_at | 1631493_at   | 1641373_at   | 1630528_at   | 1628806_at   | 1635608_at   |
| 1631212_at | 1634436_at   | 1627002_at   | 1624186_at   | 1625477_a_at | 1625512_s_at |
| 1641201_at | 1635542_at   | 1624263_at   | 1632540_at   | 1632551_at   | 1626366_at   |
| 1634591_at | 1635283_at   | 1633812_at   | 1625231_at   | 1631541_at   | 1637797_at   |

|              |              |              |              |              |              |
|--------------|--------------|--------------|--------------|--------------|--------------|
| 1625338_at   | 1630375_at   | 1626831_at   | 1640977_at   | 1630763_at   | 1638036_at   |
| 1626240_s_at | 1636407_at   | 1630750_at   | 1634583_s_at | 1635356_at   | 1633381_at   |
| 1635151_at   | 1640906_at   | 1627087_at   | 1634647_at   | 1636217_at   | 1631228_a_at |
| 1624180_at   | 1633730_at   | 1630057_at   | 1637084_at   | 1628714_at   | 1629209_at   |
| 1636255_s_at | 1637485_at   | 1634507_s_at | 1640746_at   | 1635365_at   | 1639170_at   |
| 1636694_at   | 1634940_at   | 1627495_at   | 1641160_s_at | 1629756_at   | 1641168_s_at |
| 1640246_at   | 1641084_at   | 1640066_at   | 1623239_at   | 1635875_at   | 1625002_a_at |
| 1634552_at   | 1627822_at   | 1629620_s_at | 1633292_a_at | 1625147_at   | 1634575_at   |
| 1625466_at   | 1630170_at   | 1637262_at   | 1631817_a_at | 1638884_at   | 1632142_at   |
| 1641479_at   | 1626173_at   | 1626724_at   | 1640653_at   | 1629309_at   | 1640884_at   |
| 1634077_at   | 1632212_at   | 1624032_at   | 1631127_at   | 1633958_at   | 1640458_at   |
| 1629578_at   | 1633951_at   | 1638576_at   | 1628986_at   | 1630619_at   | 1640399_at   |
| 1631479_at   | 1632683_s_at | 1638468_at   | 1634909_at   | 1629432_at   | 1641654_a_at |
| 1631472_at   | 1630503_at   | 1634779_at   | 1632630_at   | 1628041_a_at | 1627068_at   |
| 1630006_at   | 1631971_at   | 1634208_a_at | 1628272_a_at | 1637249_at   | 1627464_at   |
| 1636491_at   | 1625764_at   | 1636488_at   | 1626568_at   | 1641428_at   | 1636508_at   |
| 1623793_at   | 1629375_at   | 1632565_at   | 1635712_at   | 1631749_at   | 1632343_at   |
| 1638724_at   | 1634107_at   | 1623045_at   | 1635637_at   | 1623702_at   | 1634257_at   |
| 1640440_at   | 1641071_at   | 1623244_at   | 1626653_a_at | 1638248_at   | 1637164_at   |
| 1625680_a_at | 1625837_at   | 1628103_at   | 1636153_at   | 1630208_at   | 1635968_at   |
| 1640963_at   | 1631017_at   | 1636246_a_at | 1639857_at   | 1628682_at   | 1640006_at   |

|              |              |              |              |              |              |
|--------------|--------------|--------------|--------------|--------------|--------------|
| 1635892_at   | 1623643_s_at | 1634070_at   | 1635049_at   | 1633382_s_at | 1626401_at   |
| 1628161_at   | 1639415_at   | 1635130_a_at | 1634594_at   | 1641116_at   | 1628264_a_at |
| 1626180_at   | 1637470_at   | 1624150_at   | 1626986_at   | 1640480_at   | 1625565_at   |
| 1638070_at   | 1626783_at   | 1623268_a_at | 1632370_at   | 1639153_at   | 1630805_at   |
| 1638179_at   | 1638830_at   | 1629733_at   | 1637776_at   | 1627060_s_at | 1638680_at   |
| 1640101_at   | 1632089_at   | 1624668_s_at | 1635450_a_at | 1638297_at   | 1625276_a_at |
| 1638970_at   | 1632438_at   | 1625169_at   | 1635344_at   | 1623425_at   | 1636273_at   |
| 1628175_at   | 1630467_a_at | 1641357_at   | 1638414_a_at | 1632504_at   | 1625257_s_at |
| 1628818_at   | 1631684_at   | 1625589_at   | 1641288_at   | 1626328_at   | 1631171_at   |
| 1632984_s_at | 1623546_at   | 1635343_a_at | 1624113_at   | 1635593_at   | 1641455_at   |
| 1639357_at   | 1633857_at   | 1626414_at   | 1631533_at   | 1634412_at   | 1623704_at   |
| 1641420_s_at | 1633675_at   | 1627377_at   | 1629270_at   | 1626811_at   | 1633023_at   |
| 1635981_a_at | 1639731_at   | 1636611_at   | 1625792_s_at | 1629158_at   | 1635796_a_at |
| 1635931_at   | 1632772_at   | 1626499_at   | 1641430_at   | 1637053_at   | 1638938_at   |
| 1641529_s_at | 1633915_at   | 1639359_at   | 1635437_at   | 1640700_at   | 1633054_at   |
| 1635028_s_at | 1638120_at   | 1630398_at   | 1628924_a_at | 1641498_at   | 1630410_at   |
| 1637265_at   | 1632389_at   | 1626345_at   | 1625573_at   | 1625426_at   | 1633523_at   |
| 1628088_at   | 1628784_at   | 1624292_a_at | 1631604_at   | 1623733_at   | 1638157_at   |
| 1628785_at   | 1623852_at   | 1640315_at   | 1635223_at   | 1629036_at   | 1624484_a_at |
| 1638763_at   | 1638305_at   | 1641714_at   | 1637955_a_at | 1641268_at   | 1640138_at   |
| 1632222_a_at | 1626883_at   | 1626929_at   | 1640329_s_at | 1628483_at   | 1641280_at   |

|              |              |              |              |              |              |
|--------------|--------------|--------------|--------------|--------------|--------------|
| 1622965_s_at | 1632111_at   | 1631149_s_at | 1629136_at   | 1630344_at   | 1640078_at   |
| 1638237_at   | 1641196_at   | 1625268_at   | 1631227_at   | 1626324_at   | 1627449_at   |
| 1629718_at   | 1638981_at   | 1632087_at   | 1629221_at   | 1624656_s_at | 1631784_at   |
| 1638265_s_at | 1638238_at   | 1625387_s_at | 1637773_s_at | 1630754_at   | 1632954_at   |
| 1632813_at   | 1632263_at   | 1637226_at   | 1636550_at   | 1622935_at   | 1633082_at   |
| 1638889_at   | 1625849_at   | 1637727_at   | 1634560_at   | 1623564_at   | 1625363_at   |
| 1632923_at   | 1640666_at   | 1636451_a_at | 1635840_s_at | 1633566_at   | 1635342_at   |
| 1631766_at   | 1637332_at   | 1635836_at   | 1631509_a_at | 1633031_at   | 1630993_at   |
| 1636773_a_at | 1624260_at   | 1635299_at   | 1633247_at   | 1632433_at   | 1625480_at   |
| 1627845_at   | 1635603_at   | 1631821_at   | 1638765_at   | 1633743_at   | 1627666_at   |
| 1634193_at   | 1627031_at   | 1632711_at   | 1624423_at   | 1625833_at   | 1627393_at   |
| 1629868_s_at | 1631115_at   | 1635203_at   | 1637605_s_at | 1635915_at   | 1635126_a_at |
| 1624364_at   | 1640346_at   | 1639349_at   | 1631191_at   | 1633430_at   | 1624271_at   |
| 1636606_at   | 1638549_at   | 1640147_at   | 1634563_at   | 1630820_at   | 1640069_at   |
| 1623154_a_at | 1623478_at   | 1640263_at   | 1637444_s_at | 1640944_at   | 1629537_s_at |
| 1636740_at   | 1638312_at   | 1641741_a_at | 1637299_s_at | 1624390_a_at | 1640236_at   |
| 1624482_at   | 1625598_at   | 1634697_at   | 1625165_at   | 1629777_at   | 1632313_at   |
| 1641699_at   | 1636769_at   | 1629759_at   | 1641369_at   | 1633822_at   | 1625244_at   |
| 1640289_a_at | 1639205_s_at | 1637752_a_at | 1626552_at   | 1622948_at   | 1636806_at   |
| 1641623_at   | 1629241_at   | 1641359_at   | 1623166_at   | 1629406_at   | 1639019_s_at |
| 1639632_at   | 1625444_at   | 1636884_s_at | 1639075_a_at | 1630729_at   | 1636722_at   |

|              |              |              |              |              |              |
|--------------|--------------|--------------|--------------|--------------|--------------|
| 1622907_at   | 1631581_at   | 1629055_a_at | 1634437_at   | 1623838_s_at | 1630861_at   |
| 1639337_at   | 1636693_at   | 1624195_at   | 1638750_at   | 1626392_s_at | 1630550_a_at |
| 1631369_at   | 1634300_at   | 1634442_at   | 1633609_at   | 1625806_at   | 1628745_at   |
| 1632383_at   | 1631723_at   | 1626949_at   | 1636732_at   | 1640660_at   | 1638101_at   |
| 1638339_at   | 1636353_s_at | 1638453_at   | 1625934_at   | 1639367_a_at | 1639302_at   |
| 1624836_at   | 1630351_at   | 1630519_at   | 1627577_at   | 1626586_at   | 1624372_at   |
| 1637520_at   | 1629834_at   | 1630746_at   | 1640633_s_at | 1641157_at   | 1630881_at   |
| 1639313_at   | 1637015_s_at | 1624635_at   | 1627794_a_at | 1637125_at   | 1626918_at   |
| 1633215_at   | 1635031_s_at | 1626371_at   | 1640239_at   | 1627961_a_at | 1636291_at   |
| 1627982_at   | 1638496_at   | 1630781_at   | 1623824_at   | 1634324_at   | 1626222_at   |
| 1632517_at   | 1634427_at   | 1634217_s_at | 1632931_at   | 1638862_at   | 1636788_a_at |
| 1641193_s_at | 1637852_at   | 1634029_at   | 1636256_s_at | 1638343_at   | 1633646_at   |
| 1637993_at   | 1634177_a_at | 1633322_at   | 1635645_at   | 1634143_at   | 1625032_s_at |
| 1629109_at   | 1640191_a_at | 1626769_s_at | 1630565_at   | 1639818_s_at | 1637632_at   |
| 1640793_at   | 1638146_at   | 1640826_at   | 1630949_s_at | 1625129_at   | 1638354_at   |
| 1641541_a_at | 1634518_at   | 1639440_at   | 1624795_at   | 1636505_at   | 1633060_at   |
| 1635704_at   | 1629466_at   | 1637402_at   | 1634048_a_at | 1633349_at   | 1634240_at   |
| 1634541_a_at | 1627015_at   | 1629124_at   | 1623449_at   | 1633760_at   | 1623902_at   |
| 1629525_at   | 1626204_at   | 1631671_at   | 1631446_at   | 1625624_at   | 1636600_a_at |
| 1633584_at   | 1641372_at   | 1624510_at   | 1624357_at   | 1632392_s_at | 1625996_s_at |
| 1624782_a_at | 1624193_s_at | 1630527_at   | 1629655_at   | 1627676_at   | 1631948_s_at |

|              |              |              |              |              |              |
|--------------|--------------|--------------|--------------|--------------|--------------|
| 1627824_at   | 1640121_a_at | 1631194_at   | 1625212_at   | 1627073_a_at | 1630745_at   |
| 1624145_a_at | 1630917_at   | 1638562_a_at | 1641429_at   | 1625134_at   | 1624159_at   |
| 1636243_at   | 1637715_a_at | 1634957_at   | 1624485_at   | 1632545_s_at | 1630216_at   |
| 1634289_at   | 1630743_at   | 1628552_at   | 1623491_at   | 1637608_at   | 1630987_at   |
| 1636358_a_at | 1627403_s_at | 1632420_at   | 1635280_at   | 1625490_at   | 1637298_at   |
| 1641187_at   | 1625845_s_at | 1626435_at   | 1639544_at   | 1639646_at   | 1636777_at   |
| 1633716_at   | 1623456_at   | 1636175_a_at | 1636089_at   | 1627938_at   | 1638415_at   |
| 1636632_at   | 1639845_at   | 1635740_at   | 1637946_at   | 1641340_s_at | 1629960_s_at |
| 1641062_at   | 1636919_at   | 1637982_at   | 1633346_at   | 1639067_at   | 1624950_a_at |
| 1637309_a_at | 1633059_at   | 1623650_a_at | 1630309_s_at | 1632491_at   | 1623934_at   |
| 1627850_at   | 1627546_at   | 1640957_at   | 1636967_a_at | 1623306_at   | 1631370_at   |
| 1630661_at   | 1639398_at   | 1627662_at   | 1633980_at   | 1639972_at   | 1630568_at   |
| 1638078_at   | 1634012_at   | 1634164_at   | 1625571_at   | 1628637_at   | 1640178_at   |
| 1630844_at   | 1627116_at   | 1623809_s_at | 1641120_at   | 1632180_at   | 1632728_at   |
| 1635218_at   | 1623090_at   | 1636051_at   | 1630991_at   | 1639264_at   | 1627990_at   |
| 1630144_at   | 1636958_s_at | 1629367_at   | 1625773_at   | 1638844_s_at | 1631226_at   |
| 1624742_a_at | 1639430_at   | 1625531_at   | 1636249_at   | 1632810_at   | 1629762_at   |
| 1625688_at   | 1633700_at   | 1627505_at   | 1629930_s_at | 1633503_at   | 1628299_at   |
| 1624571_s_at | 1623673_at   | 1637716_a_at | 1627934_at   | 1631546_at   | 1632548_a_at |
| 1637997_at   | 1634750_at   | 1640351_s_at | 1624156_at   | 1624555_at   | 1623487_at   |
| 1633617_at   | 1630672_at   | 1623985_at   | 1635492_at   | 1636021_at   | 1628723_at   |

|              |              |              |              |              |              |
|--------------|--------------|--------------|--------------|--------------|--------------|
| 1626028_at   | 1630318_at   | 1625733_at   | 1638974_at   | 1639180_at   | 1622962_a_at |
| 1639966_a_at | 1625266_at   | 1627516_at   | 1630131_at   | 1634072_s_at | 1639272_at   |
| 1625295_at   | 1640691_at   | 1623609_at   | 1623553_a_at | 1628468_at   | 1641494_at   |
| 1634577_s_at | 1635394_at   | 1625000_a_at | 1628167_s_at | 1625700_a_at | 1625436_at   |
| 1633261_a_at | 1624550_at   | 1638147_at   | 1626382_s_at | 1635654_at   | 1636883_s_at |
| 1626300_at   | 1627827_a_at | 1638804_a_at | 1639553_at   | 1626055_at   | 1624788_at   |
| 1629541_at   | 1640298_at   | 1637825_at   | 1626117_at   | 1638677_at   | 1641336_at   |
| 1635389_s_at | 1627405_at   | 1625474_s_at | 1639324_at   | 1637422_at   | 1624008_at   |
| 1633380_at   | 1623641_at   | 1638385_at   | 1633830_at   | 1634848_at   | 1641105_at   |
| 1638216_at   | 1626309_at   | 1625345_at   | 1640202_at   | 1631045_a_at | 1634558_s_at |
| 1634429_at   | 1629716_a_at | 1638808_at   | 1636287_at   | 1634527_s_at | 1627959_a_at |
| 1623794_at   | 1627620_at   | 1637676_at   | 1625017_at   | 1634625_at   | 1633139_at   |
| 1627349_at   | 1626844_at   | 1638236_at   | 1629472_s_at | 1639354_at   | 1635135_at   |
| 1624028_at   | 1634311_at   | 1628632_at   | 1628389_at   | 1628798_at   | 1630438_at   |
| 1622930_a_at | 1640698_at   | 1632393_at   | 1634264_at   | 1638326_at   | 1626880_at   |
| 1635878_s_at | 1640683_at   | 1630997_at   | 1632254_a_at | 1638675_at   | 1636644_at   |
| 1631520_at   | 1632233_at   | 1624614_at   | 1638272_at   | 1626075_at   | 1637269_at   |
| 1629598_at   | 1637956_s_at | 1638869_at   | 1626579_at   | 1635581_at   | 1629610_at   |
| 1634383_a_at | 1626313_at   | 1636211_at   | 1636607_at   | 1633492_at   | 1638001_a_at |
| 1639867_at   | 1627562_at   | 1626846_s_at | 1628490_at   | 1641317_at   | 1640511_at   |
| 1636533_at   | 1624700_a_at | 1632410_at   | 1623404_at   | 1635670_at   | 1639087_at   |



|              |              |              |              |              |              |
|--------------|--------------|--------------|--------------|--------------|--------------|
| 1635636_at   | 1631873_at   | 1626718_at   | 1638104_a_at | 1640509_s_at | 1626738_at   |
| 1623875_at   | 1638857_at   | 1630080_at   | 1628494_a_at | 1626110_a_at | 1634696_at   |
| 1633536_at   | 1633210_at   | 1624798_s_at | 1633163_at   | 1639016_at   | 1639604_at   |
| 1625112_at   | 1623009_at   | 1623363_at   | 1630623_a_at | 1638208_at   | 1632642_a_at |
| 1632663_at   | 1641023_at   | 1634408_at   | 1628309_at   | 1624489_a_at | 1628418_at   |
| 1638849_a_at | 1627165_a_at | 1624080_s_at | 1631842_at   | 1626678_at   | 1623955_at   |
| 1627646_at   | 1632808_at   | 1626835_at   | 1639599_at   | 1623722_at   | 1635983_a_at |
| 1635468_a_at | 1628630_at   | 1628057_at   | 1638669_at   | 1631897_s_at | 1628539_at   |
| 1626823_a_at | 1635230_at   | 1640577_a_at | 1634253_at   | 1634809_s_at | 1627713_at   |
| 1633540_at   | 1640540_at   | 1634713_at   | 1641704_at   | 1629420_at   | 1624572_a_at |
| 1638735_at   | 1634966_a_at | 1628615_at   | 1638927_at   | 1633091_at   | 1634970_at   |
| 1629053_at   | 1631652_at   | 1625905_at   | 1628450_at   | 1627423_at   | 1626886_at   |
| 1625242_at   | 1634101_at   | 1623387_at   | 1629563_at   | 1625193_at   | 1635207_at   |
| 1630635_s_at | 1626373_at   | 1633260_at   | 1627623_s_at | 1638821_a_at | 1636541_at   |
| 1624670_at   | 1628828_s_at | 1632322_at   | 1641401_s_at | 1640566_at   | 1639230_at   |
| 1625393_s_at | 1638528_at   | 1633765_at   | 1641606_s_at | 1640744_a_at | 1638257_at   |
| 1624204_at   | 1628779_a_at | 1628424_at   | 1632472_s_at | 1636781_at   | 1627738_a_at |
| 1640974_a_at | 1635470_at   | 1635016_at   | 1632245_a_at | 1625646_at   | 1625217_at   |
| 1625185_at   | 1636354_at   | 1631637_a_at | 1641669_a_at | 1635831_at   | 1623847_at   |
| 1628187_s_at | 1625522_at   | 1626325_a_at | 1639424_at   | 1641244_at   | 1631192_at   |
| 1625006_at   | 1626606_at   | 1630325_at   | 1638464_a_at | 1638247_at   | 1623046_at   |

|              |              |              |              |              |              |
|--------------|--------------|--------------|--------------|--------------|--------------|
| 1623629_at   | 1623027_s_at | 1626360_at   | 1627674_at   | 1635527_at   | 1635198_at   |
| 1632471_at   | 1623318_s_at | 1634641_a_at | 1628869_s_at | 1629161_at   | 1637282_at   |
| 1629952_at   | 1635111_s_at | 1628648_at   | 1637085_at   | 1632487_at   | 1635301_at   |
| 1640657_at   | 1640738_a_at | 1624996_at   | 1636197_at   | 1632336_at   | 1629279_at   |
| 1639809_at   | 1639388_a_at | 1626524_at   | 1630011_at   | 1634320_at   | 1625027_a_at |
| 1624503_at   | 1631636_at   | 1631696_s_at | 1635683_at   | 1641000_a_at | 1626577_at   |
| 1623716_at   | 1626439_at   | 1628456_at   | 1631776_at   | 1624983_s_at | 1634604_at   |
| 1632654_at   | 1626981_s_at | 1632743_a_at | 1623331_at   | 1627343_a_at | 1630112_at   |
| 1636990_at   | 1633789_at   | 1627699_at   | 1639626_at   | 1632292_at   | 1633399_at   |
| 1637578_at   | 1625876_at   | 1627448_at   | 1626818_at   | 1633003_at   | 1624337_at   |
| 1636996_at   | 1639600_at   | 1633266_at   | 1625756_at   | 1639691_at   | 1628249_at   |
| 1635165_a_at | 1636980_s_at | 1623020_at   | 1630289_at   | 1632928_at   | 1638270_at   |
| 1639485_at   | 1623820_at   | 1629520_at   | 1628213_s_at | 1641659_s_at | 1627184_at   |
| 1632875_at   | 1627138_at   | 1631029_at   | 1629623_at   | 1640052_at   | 1639212_a_at |
| 1637742_at   | 1638819_at   | 1623108_at   | 1624222_s_at | 1624474_at   | 1625892_a_at |
| 1634943_at   | 1631627_at   | 1639853_at   | 1633338_at   | 1627958_at   | 1633448_at   |
| 1641664_at   | 1637429_at   | 1633664_at   | 1627655_at   | 1640489_at   | 1623635_at   |
| 1634299_at   | 1634176_a_at | 1635580_at   | 1637002_at   | 1631223_at   | 1640644_at   |
| 1632342_a_at | 1632400_at   | 1626649_s_at | 1624318_at   | 1632956_at   | 1627325_at   |
| 1628133_at   | 1636298_at   | 1628731_s_at | 1637403_at   | 1641232_s_at | 1634130_a_at |
| 1627415_at   | 1640768_at   | 1625744_at   | 1633364_at   | 1627171_at   | 1629088_at   |

|              |              |              |              |              |              |
|--------------|--------------|--------------|--------------|--------------|--------------|
| 1636206_at   | 1638919_at   | 1635250_at   | 1623797_at   | 1624386_at   | 1624198_at   |
| 1626049_at   | 1637325_at   | 1640418_at   | 1640549_at   | 1631116_at   | 1641419_at   |
| 1624037_s_at | 1637660_at   | 1626817_at   | 1638522_at   | 1631675_a_at | 1638822_at   |
| 1626788_a_at | 1640058_at   | 1636887_s_at | 1638030_at   | 1638126_at   | 1638321_s_at |
| 1630800_s_at | 1637423_at   | 1625549_at   | 1629180_at   | 1635668_at   | 1626507_at   |
| 1639520_at   | 1640943_at   | 1633284_at   | 1629008_at   | 1633791_at   | 1639761_s_at |
| 1625414_at   | 1641342_at   | 1637494_at   | 1635185_at   | 1640535_s_at | 1625375_at   |
| 1640005_at   | 1627627_at   | 1626209_a_at | 1636797_at   | 1628173_at   | 1627861_s_at |
| 1632024_at   | 1632161_at   | 1623508_at   | 1631278_a_at | 1632103_at   | 1631618_s_at |
| 1639286_s_at | 1632696_at   | 1640429_a_at | 1631266_a_at | 1629480_at   | 1626169_at   |
| 1635768_at   | 1638196_at   | 1624738_at   | 1635314_at   | 1638501_at   | 1631137_at   |
| 1635799_at   | 1627900_at   | 1636628_at   | 1639094_at   | 1632652_s_at | 1627007_at   |
| 1623688_at   | 1637576_s_at | 1630073_at   | 1639625_at   | 1629039_at   | 1634528_at   |
| 1625166_at   | 1627739_at   | 1628960_s_at | 1639389_at   | 1638509_at   | 1632586_at   |
| 1640669_at   | 1640487_at   | 1631158_at   | 1630405_at   | 1630514_at   | 1622924_at   |
| 1640695_at   | 1634000_a_at | 1623428_at   | 1629444_at   | 1628040_at   | 1626476_at   |
| 1626436_at   | 1638310_at   | 1623569_at   | 1636574_s_at | 1626514_at   | 1629941_a_at |
| 1626458_at   | 1627323_at   | 1639178_s_at | 1622944_at   | 1639256_at   | 1628351_at   |
| 1640452_at   | 1630900_at   | 1625464_at   | 1628279_s_at | 1635821_at   | 1626739_s_at |
| 1641424_at   | 1628486_a_at | 1626068_at   | 1635442_a_at | 1634953_at   | 1633565_at   |
| 1633826_at   | 1637497_at   | 1639060_at   | 1636623_at   | 1625344_at   | 1631973_at   |

|              |              |              |              |              |              |
|--------------|--------------|--------------|--------------|--------------|--------------|
| 1629821_at   | 1633308_at   | 1630916_at   | 1625891_at   | 1635751_at   | 1630115_at   |
| 1624801_at   | 1634553_at   | 1639895_at   | 1639025_at   | 1633047_at   | 1632846_at   |
| 1628882_at   | 1641146_at   | 1641488_at   | 1629896_at   | 1631224_at   | 1635978_at   |
| 1623724_at   | 1634002_at   | 1632078_at   | 1640781_a_at | 1625657_at   | 1637489_at   |
| 1624840_at   | 1637747_s_at | 1631561_s_at | 1624883_at   | 1623256_at   | 1638511_at   |
| 1641493_at   | 1635588_at   | 1640227_at   | 1629176_at   | 1624179_at   | 1628937_s_at |
| 1634481_at   | 1640251_s_at | 1636986_at   | 1639890_at   | 1625530_at   | 1636770_at   |
| 1629428_at   | 1633568_s_at | 1632533_at   | 1625458_a_at | 1629903_at   | 1638678_at   |
| 1634593_at   | 1636925_at   | 1625947_at   | 1628201_at   | 1624395_at   | 1630645_at   |
| 1630543_at   | 1629426_s_at | 1640421_at   | 1641212_a_at | 1627080_at   | 1630162_at   |
| 1641508_s_at | 1635723_s_at | 1633129_at   | 1638847_s_at | 1637260_at   | 1629778_s_at |
| 1631595_at   | 1627526_at   | 1634121_at   | 1633076_at   | 1624101_at   | 1635294_at   |
| 1639102_at   | 1638714_at   | 1631648_at   | 1624345_a_at | 1624888_at   | 1630792_at   |
| 1624285_at   | 1640504_at   | 1636738_at   | 1631362_at   | 1627742_at   | 1623111_at   |
| 1640898_at   | 1640243_at   | 1627155_s_at | 1629159_at   | 1640803_at   | 1633383_at   |
| 1629106_at   | 1630877_a_at | 1628972_at   | 1627183_at   | 1637027_s_at | 1624141_at   |
| 1633602_at   | 1640118_at   | 1630422_at   | 1635336_at   | 1636459_s_at | 1641285_at   |
| 1630778_at   | 1625026_at   | 1639328_at   | 1628976_at   | 1639480_at   | 1632703_at   |
| 1631822_at   | 1637205_at   | 1632731_at   | 1624297_at   | 1628345_at   | 1632341_at   |
| 1629967_s_at | 1622920_at   | 1628123_at   | 1625078_at   | 1634942_at   | 1636040_at   |
| 1630177_at   | 1640845_at   | 1641650_at   | 1629350_at   | 1637203_at   | 1634839_at   |

|              |              |              |              |              |              |
|--------------|--------------|--------------|--------------|--------------|--------------|
| 1641223_at   | 1636210_at   | 1626680_at   | 1635972_at   | 1624239_at   | 1640855_at   |
| 1623272_at   | 1633418_at   | 1636379_a_at | 1640846_at   | 1641017_at   | 1637319_at   |
| 1623605_a_at | 1632701_at   | 1632435_at   | 1640053_at   | 1631251_at   | 1625755_at   |
| 1638020_at   | 1641624_at   | 1629084_at   | 1633224_at   | 1641720_at   | 1624257_at   |
| 1635271_at   | 1635084_at   | 1634377_at   | 1630915_at   | 1641012_at   | 1629955_at   |
| 1627768_at   | 1632272_a_at | 1628834_a_at | 1626230_s_at | 1629295_at   | 1636767_at   |
| 1628292_s_at | 1641469_at   | 1624993_at   | 1624815_at   | 1636793_at   | 1623030_at   |
| 1624170_at   | 1634977_at   | 1627206_at   | 1640544_a_at | 1639908_a_at | 1634919_at   |
| 1633819_at   | 1634980_s_at | 1632184_at   | 1627759_at   | 1635761_at   | 1625974_at   |
| 1624515_at   | 1633050_at   | 1637316_at   | 1638645_at   | 1633749_at   | 1638367_at   |
| 1623956_at   | 1640244_at   | 1639694_s_at | 1624777_at   | 1639159_at   | 1625829_a_at |
| 1641318_at   | 1635076_at   | 1627249_a_at | 1637547_at   | 1631466_at   | 1628764_at   |
| 1632198_at   | 1629251_at   | 1628558_at   | 1626170_at   | 1627499_at   | 1626023_at   |
| 1630637_s_at | 1638853_at   | 1623271_a_at | 1635200_at   | 1630268_at   | 1624246_s_at |
| 1624514_at   | 1639374_s_at | 1637274_at   | 1631513_at   | 1639727_at   | 1633751_at   |
| 1623817_at   | 1623806_at   | 1622983_a_at | 1626942_at   | 1637928_at   | 1637032_at   |
| 1639265_at   | 1626022_at   | 1623281_s_at | 1623940_at   | 1625839_at   | 1623471_s_at |
| 1638292_at   | 1637501_a_at | 1638580_at   | 1628131_at   | 1622941_at   | 1632759_at   |
| 1635870_at   | 1624975_at   | 1638007_at   | 1637992_at   | 1624543_s_at | 1637475_at   |
| 1641381_s_at | 1626304_at   | 1641689_at   | 1634419_at   | 1630242_at   | 1630952_at   |
| 1627048_at   | 1630437_s_at | 1624496_at   | 1640997_at   | 1628290_s_at | 1623796_at   |

|              |              |              |              |              |              |
|--------------|--------------|--------------|--------------|--------------|--------------|
| 1630403_s_at | 1634464_at   | 1633926_at   | 1632207_a_at | 1634808_at   | 1637564_a_at |
| 1627401_at   | 1639663_at   | 1636002_at   | 1639579_s_at | 1637959_at   | 1634159_s_at |
| 1635687_at   | 1635548_s_at | 1628241_at   | 1632415_s_at | 1623015_at   | 1628634_at   |
| 1634194_at   | 1628521_at   | 1625783_at   | 1631512_at   | 1637275_a_at | 1640145_at   |
| 1636141_s_at | 1624406_at   | 1625948_at   | 1627642_at   | 1637240_a_at | 1623495_at   |
| 1629430_s_at | 1623645_a_at | 1639654_at   | 1636314_at   | 1639882_at   | 1641370_s_at |
| 1626039_at   | 1635040_a_at | 1632271_a_at | 1631214_at   | 1633053_at   | 1624010_a_at |
| 1628061_at   | 1638658_at   | 1623551_at   | 1639641_at   | 1634601_at   | 1640184_at   |
| 1631954_at   | 1634278_at   | 1629809_at   | 1624253_at   | 1625632_at   | 1626600_at   |
| 1626720_at   | 1632878_at   | 1635079_at   | 1633576_s_at | 1638392_at   | 1628792_at   |
| 1635939_a_at | 1632303_a_at | 1624894_s_at | 1623826_at   | 1636774_at   | 1629470_at   |
| 1635060_at   | 1625989_at   | 1624763_at   | 1632350_at   | 1640915_at   | 1632611_at   |
| 1631200_at   | 1624092_at   | 1637121_at   | 1626987_at   | 1636653_at   | 1629149_at   |
| 1630530_at   | 1630206_at   | 1639530_at   | 1633560_at   | 1641178_s_at | 1638319_at   |
| 1637559_at   | 1641626_at   | 1629449_at   | 1624736_a_at | 1627709_at   | 1630141_at   |
| 1627669_at   | 1639406_at   | 1623440_at   | 1635666_at   | 1625835_at   | 1637735_at   |
| 1627314_s_at | 1630882_s_at | 1625233_at   | 1633012_at   | 1631267_at   | 1636829_at   |
| 1631455_at   | 1640177_at   | 1625978_at   | 1632513_at   | 1635463_at   | 1631208_at   |
| 1623088_at   | 1638313_at   | 1639211_at   | 1637479_at   | 1623102_at   | 1634146_at   |
| 1640699_at   | 1632710_s_at | 1622998_a_at | 1632140_at   | 1631268_at   | 1626853_a_at |
| 1623247_at   | 1641655_at   | 1637926_s_at | 1627453_s_at | 1638173_s_at | 1628658_at   |

|              |              |              |              |              |              |
|--------------|--------------|--------------|--------------|--------------|--------------|
| 1638591_at   | 1626702_at   | 1636245_at   | 1641734_at   | 1634298_at   | 1626988_at   |
| 1638690_at   | 1634245_at   | 1630440_at   | 1639638_a_at | 1628547_at   | 1624518_at   |
| 1626217_at   | 1630492_at   | 1640335_at   | 1636336_at   | 1629939_a_at | 1641124_at   |
| 1627545_at   | 1629476_at   | 1638670_a_at | 1629474_at   | 1638153_at   | 1632364_at   |
| 1639442_a_at | 1635512_at   | 1622980_at   | 1636735_s_at | 1632026_at   | 1633810_at   |
| 1632374_at   | 1640848_at   | 1626580_at   | 1636036_at   | 1641252_at   | 1627831_at   |
| 1628930_at   | 1634258_at   | 1635989_at   | 1624697_at   | 1634700_at   | 1638317_at   |
| 1636858_at   | 1636708_at   | 1626011_at   | 1636190_at   | 1637466_at   | 1634124_at   |
| 1641605_at   | 1640446_s_at | 1631122_at   | 1630823_at   | 1640333_at   | 1630233_at   |
| 1641298_at   | 1633106_at   | 1640920_at   | 1622933_at   | 1626112_at   | 1640656_a_at |
| 1629285_at   | 1633592_a_at | 1640762_at   | 1628804_at   | 1626486_at   | 1623479_at   |
| 1629698_at   | 1637320_at   | 1629949_at   | 1637617_at   | 1636615_at   | 1639509_at   |
| 1623747_at   | 1625872_at   | 1623540_at   | 1641214_at   | 1637798_at   | 1637941_at   |
| 1627154_at   | 1641025_at   | 1631180_at   | 1629440_at   | 1633256_at   | 1630932_at   |
| 1628353_at   | 1640984_s_at | 1638485_s_at | 1629089_a_at | 1641671_at   | 1631640_a_at |
| 1637581_at   | 1632873_at   | 1625252_s_at | 1624596_at   | 1624693_at   | 1625836_at   |
| 1636005_at   | 1629607_at   | 1624194_a_at | 1631712_at   | 1635925_at   | 1632503_at   |
| 1630363_at   | 1641568_a_at | 1629954_at   | 1627581_at   | 1635517_at   | 1640411_at   |
| 1629918_at   | 1638469_s_at | 1640610_at   | 1634531_at   | 1634390_s_at | 1628826_at   |
| 1624699_s_at | 1631088_at   | 1626801_at   | 1629879_at   | 1629405_s_at | 1630981_at   |
| 1634158_at   | 1631139_a_at | 1624858_at   | 1637101_at   | 1624848_at   | 1638609_s_at |

|              |              |              |              |              |              |
|--------------|--------------|--------------|--------------|--------------|--------------|
| 1634798_at   | 1625995_a_at | 1627837_at   | 1629673_at   | 1630431_s_at | 1623861_at   |
| 1625044_at   | 1629602_at   | 1627977_at   | 1628887_a_at | 1631258_at   | 1633277_at   |
| 1631861_at   | 1633253_s_at | 1624887_at   | 1633649_s_at | 1638476_s_at | 1637682_at   |
| 1638614_at   | 1639769_at   | 1631739_at   | 1633209_s_at | 1633554_at   | 1636231_at   |
| 1640981_at   | 1635370_at   | 1630982_at   | 1633856_at   | 1636657_at   | 1633596_at   |
| 1637618_at   | 1627788_at   | 1636122_at   | 1623816_s_at | 1625860_s_at | 1624690_at   |
| 1635221_at   | 1626475_at   | 1636631_at   | 1639228_at   | 1623235_at   | 1634196_at   |
| 1637554_a_at | 1634117_at   | 1629853_at   | 1631196_at   | 1633019_a_at | 1636442_at   |
| 1640080_at   | 1640887_at   | 1631919_at   | 1623844_at   | 1637192_at   | 1640198_at   |
| 1635187_s_at | 1639071_a_at | 1636073_at   | 1638564_at   | 1627770_at   | 1624692_at   |
| 1640009_at   | 1630958_at   | 1626733_at   | 1639588_at   | 1638995_at   | 1634858_s_at |
| 1629391_at   | 1632318_at   | 1638997_at   | 1638841_at   | 1627527_s_at | 1627437_at   |
| 1627685_a_at | 1637313_at   | 1624603_at   | 1635278_at   | 1632894_at   | 1627996_a_at |
| 1639527_at   | 1627132_at   | 1625679_at   | 1636163_at   | 1632771_at   | 1627657_at   |
| 1630989_a_at | 1633008_at   | 1636809_at   | 1626164_at   | 1630732_at   | 1628922_s_at |
| 1638942_at   | 1635330_at   | 1634879_at   | 1628044_at   | 1626092_at   | 1640127_at   |
| 1640794_at   | 1625728_at   | 1636173_s_at | 1626787_s_at | 1631690_a_at | 1633761_at   |
| 1625748_s_at | 1624718_a_at | 1628593_at   | 1632197_at   | 1625572_s_at | 1624599_at   |
| 1633709_at   | 1628928_s_at | 1637056_s_at | 1630498_at   | 1628620_at   | 1623312_s_at |
| 1640339_at   | 1629208_at   | 1634740_at   | 1628874_at   | 1635621_at   | 1630547_at   |
| 1629787_at   | 1624050_at   | 1628963_at   | 1640824_at   | 1635524_at   | 1623329_at   |



|              |              |            |              |              |              |
|--------------|--------------|------------|--------------|--------------|--------------|
| 1636935_at   | 1623706_at   | 1627144_at | 1627307_at   | 1629144_at   | 1625177_at   |
| 1629552_at   | 1637923_at   | 1640961_at | 1625856_at   | 1630086_at   | 1639688_at   |
| 1639013_at   | 1624137_at   | 1641481_at | 1641549_at   | 1638431_at   | 1633911_a_at |
| 1634074_a_at | 1629906_s_at | 1629349_at | 1631392_at   | 1630051_at   | 1633439_at   |
| 1635987_at   | 1629811_at   | 1625817_at | 1638801_at   | 1636014_at   | 1633940_at   |
| 1625855_at   | 1629288_s_at | 1633134_at | 1634304_a_at | 1636587_at   | 1623759_at   |
| 1637829_at   | 1638600_at   | 1639665_at | 1632200_s_at | 1626563_at   | 1624669_at   |
| 1636583_at   | 1639901_a_at | 1628925_at | 1629195_at   | 1641294_a_at | 1636709_at   |
| 1628700_at   | 1623612_at   | 1624797_at | 1624684_at   | 1631030_at   | 1639198_at   |
| 1627868_at   | 1633117_at   | 1633755_at | 1632189_at   | 1634714_at   | 1635447_at   |
| 1630817_s_at | 1624613_at   | 1633731_at | 1633213_at   | 1634720_at   | 1623754_s_at |
| 1630912_at   | 1626412_at   | 1632519_at | 1634769_at   | 1628216_at   | 1626251_at   |
| 1631907_at   | 1629692_at   | 1629820_at | 1633964_at   | 1623128_at   | 1632138_at   |
| 1639539_at   | 1641721_a_at | 1636351_at | 1634262_s_at | 1638571_at   | 1637216_at   |
| 1630740_at   | 1633191_at   | 1630241_at | 1632847_at   | 1632816_at   | 1636498_at   |
| 1637648_at   | 1641648_at   | 1623109_at | 1628529_a_at | 1627661_at   | 1628148_at   |
| 1631751_at   | 1635487_at   | 1628559_at | 1628920_at   | 1626156_at   | 1631645_at   |
| 1628278_at   | 1637893_at   | 1633650_at | 1635513_at   | 1632510_at   | 1632182_at   |
| 1637775_at   | 1641629_at   | 1630940_at | 1633886_at   | 1639288_at   | 1637511_at   |
| 1634430_at   | 1631677_at   | 1634630_at | 1629705_at   | 1635428_at   | 1632955_at   |
| 1633000_a_at | 1635862_at   | 1629606_at | 1625725_at   | 1627640_at   | 1631058_s_at |

|              |              |              |              |              |              |
|--------------|--------------|--------------|--------------|--------------|--------------|
| 1635659_at   | 1624549_at   | 1632876_a_at | 1633274_at   | 1623974_at   | 1630202_a_at |
| 1627142_at   | 1629509_s_at | 1638697_at   | 1641519_at   | 1637689_at   | 1626478_at   |
| 1640150_s_at | 1629799_at   | 1625702_s_at | 1628603_at   | 1634949_at   | 1637960_at   |
| 1625109_at   | 1640357_at   | 1635502_at   | 1624978_at   | 1634094_a_at | 1627514_at   |
| 1626701_at   | 1630468_at   | 1631465_at   | 1640051_s_at | 1633020_at   | 1627308_s_at |
| 1626651_at   | 1633379_s_at | 1632269_at   | 1627293_at   | 1624714_at   | 1641263_at   |
| 1640638_at   | 1626213_a_at | 1637597_a_at | 1632384_at   | 1626696_at   | 1636861_at   |
| 1629928_a_at | 1627123_at   | 1638171_s_at | 1641601_at   | 1638088_at   | 1632114_at   |
| 1633254_at   | 1628561_at   | 1630600_at   | 1624592_at   | 1638988_at   | 1632600_at   |
| 1636198_at   | 1623147_at   | 1628485_at   | 1632430_at   | 1636258_at   | 1626993_at   |
| 1631829_at   | 1623839_at   | 1640010_at   | 1638544_at   | 1635213_at   | 1625651_at   |
| 1638403_at   | 1635907_at   | 1631464_at   | 1633691_at   | 1624694_at   | 1636271_a_at |
| 1641335_at   | 1624153_at   | 1630167_at   | 1624226_at   | 1627216_s_at | 1639931_at   |
| 1628578_at   | 1637807_at   | 1626808_s_at | 1626224_s_at | 1631819_s_at | 1622952_at   |
| 1636470_at   | 1633634_at   | 1637209_at   | 1634579_at   | 1632762_s_at | 1623291_at   |
| 1630992_at   | 1638192_a_at | 1634874_at   | 1630132_at   | 1630355_a_at | 1639240_a_at |
| 1633908_at   | 1632962_at   | 1625583_at   | 1627013_at   | 1633782_at   | 1623085_at   |
| 1629369_at   | 1641203_at   | 1639653_at   | 1629530_at   | 1633454_s_at | 1625062_a_at |
| 1631105_at   | 1623202_at   | 1639107_at   | 1638796_at   | 1640031_at   | 1631335_a_at |
| 1640862_a_at | 1627246_at   | 1634883_at   | 1636645_at   | 1628866_at   | 1628683_at   |
| 1625814_at   | 1630118_s_at | 1625853_at   | 1624201_at   | 1628179_at   | 1639421_at   |

|              |              |              |              |              |              |
|--------------|--------------|--------------|--------------|--------------|--------------|
| 1626469_at   | 1634045_at   | 1637628_at   | 1627725_at   | 1634862_at   | 1639640_at   |
| 1636501_at   | 1636596_at   | 1633736_at   | 1631198_at   | 1625334_at   | 1623737_a_at |
| 1629507_a_at | 1634982_at   | 1636564_at   | 1626698_at   | 1633517_at   | 1627613_at   |
| 1635279_at   | 1636910_at   | 1636949_s_at | 1632623_at   | 1639444_a_at | 1641681_s_at |
| 1635125_a_at | 1624570_a_at | 1637469_at   | 1635247_at   | 1624070_at   | 1633055_at   |
| 1622903_s_at | 1634868_at   | 1640174_at   | 1639307_at   | 1630803_at   | 1633606_s_at |
| 1638410_at   | 1623040_at   | 1630016_at   | 1633259_a_at | 1637962_at   | 1625377_at   |
| 1623998_at   | 1627331_at   | 1629302_at   | 1635564_at   | 1631182_at   | 1623606_at   |
| 1629355_at   | 1626667_at   | 1630813_at   | 1629363_at   | 1641306_at   | 1624807_at   |
| 1630246_at   | 1629489_at   | 1635439_at   | 1632665_a_at | 1624913_s_at | 1640323_at   |
| 1639392_at   | 1625280_at   | 1628382_at   | 1638797_a_at | 1634795_a_at | 1630332_at   |
| 1634296_s_at | 1638793_at   | 1631130_at   | 1629644_s_at | 1641327_at   | 1639478_at   |
| 1641597_a_at | 1641520_at   | 1634382_at   | 1632277_a_at | 1623745_at   | 1635121_a_at |
| 1640316_at   | 1637346_at   | 1637919_at   | 1632251_s_at | 1632250_at   | 1636327_at   |
| 1638087_at   | 1638499_s_at | 1641326_at   | 1627985_a_at | 1626572_at   | 1625172_s_at |
| 1634407_at   | 1630419_a_at | 1627511_at   | 1629374_at   | 1639768_at   | 1635887_at   |
| 1624945_a_at | 1626155_at   | 1624404_a_at | 1640619_at   | 1639112_s_at | 1635379_at   |
| 1640601_at   | 1623475_s_at | 1638661_at   | 1632098_at   | 1636320_at   | 1639312_at   |
| 1626957_at   | 1629625_at   | 1640905_at   | 1638651_a_at | 1633642_at   | 1641350_at   |
| 1633078_at   | 1640642_at   | 1640343_at   | 1640425_at   | 1636630_s_at | 1633703_s_at |
| 1624860_at   | 1638811_at   | 1637369_at   | 1632593_at   | 1634212_at   | 1625120_at   |

|              |              |              |              |              |              |
|--------------|--------------|--------------|--------------|--------------|--------------|
| 1627993_at   | 1625746_at   | 1624509_at   | 1627774_a_at | 1639891_at   | 1633394_a_at |
| 1625665_at   | 1624854_s_at | 1624214_at   | 1633001_at   | 1639648_at   | 1641687_at   |
| 1635067_at   | 1640821_at   | 1634504_a_at | 1633100_a_at | 1640134_a_at | 1635410_at   |
| 1636268_at   | 1625945_a_at | 1628342_s_at | 1637329_a_at | 1632577_a_at | 1626007_at   |
| 1624099_at   | 1640477_at   | 1630815_at   | 1633949_at   | 1639483_s_at | 1625844_s_at |
| 1633294_at   | 1639413_at   | 1624173_at   | 1624064_at   | 1634600_at   | 1638634_at   |
| 1630187_a_at | 1641126_at   | 1626201_at   | 1631048_at   | 1626719_a_at | 1629619_at   |
| 1625639_at   | 1636020_s_at | 1634209_at   | 1636323_at   | 1627100_s_at | 1638158_at   |
| 1637881_at   | 1626432_at   | 1636154_at   | 1640064_at   | 1632262_at   | 1638224_at   |
| 1640088_at   | 1638074_at   | 1632567_at   | 1626369_at   | 1627538_at   | 1637144_a_at |
| 1631853_at   | 1627842_at   | 1638834_a_at | 1626236_at   | 1635774_at   | 1635813_at   |
| 1639715_at   | 1625658_at   | 1633804_at   | 1630008_at   | 1635801_at   | 1623646_at   |
| 1631862_at   | 1636923_a_at | 1625481_a_at | 1631619_a_at | 1638958_at   | 1623258_at   |
| 1627141_at   | 1634116_at   | 1628101_s_at | 1634767_at   | 1625055_at   | 1637264_at   |
| 1639503_at   | 1629155_at   | 1625096_at   | 1641347_s_at | 1624014_at   | 1640034_at   |
| 1627153_at   | 1634446_at   | 1631984_at   | 1626289_at   | 1633957_s_at | 1631296_at   |
| 1623426_at   | 1635115_at   | 1629780_at   | 1631800_at   | 1634241_at   | 1637845_at   |
| 1631588_at   | 1634238_a_at | 1624841_s_at | 1627459_at   | 1639499_at   | 1637317_at   |
| 1638870_at   | 1624725_at   | 1626658_at   | 1628677_at   | 1624973_at   | 1632777_at   |
| 1626850_s_at | 1631849_at   | 1628297_a_at | 1632266_at   | 1633797_at   | 1638671_at   |
| 1628917_at   | 1625085_at   | 1637098_at   | 1632368_at   | 1623502_at   | 1623342_at   |

|              |              |              |              |              |              |
|--------------|--------------|--------------|--------------|--------------|--------------|
| 1635035_at   | 1637972_at   | 1626734_at   | 1626508_at   | 1641309_s_at | 1640927_at   |
| 1631998_at   | 1624414_at   | 1632557_s_at | 1627469_at   | 1640068_at   | 1624343_at   |
| 1624019_s_at | 1641451_at   | 1627888_at   | 1634655_at   | 1630542_at   | 1630841_at   |
| 1633034_s_at | 1626931_a_at | 1634172_at   | 1630934_at   | 1623376_s_at | 1636847_s_at |
| 1626620_at   | 1627460_at   | 1633442_at   | 1633661_at   | 1634076_at   | 1631777_a_at |
| 1641069_at   | 1637665_at   | 1623297_at   | 1623375_at   | 1625528_at   | 1636140_at   |
| 1637827_at   | 1629046_a_at | 1641478_s_at | 1623663_a_at | 1635650_at   | 1627023_at   |
| 1628809_at   | 1638349_s_at | 1635792_a_at | 1641038_at   | 1623936_at   | 1625343_at   |
| 1637100_at   | 1631527_at   | 1637142_at   | 1635811_at   | 1640995_at   | 1638277_at   |
| 1636293_at   | 1638923_at   | 1638218_at   | 1630213_at   | 1630276_at   | 1640173_at   |
| 1629194_s_at | 1635186_at   | 1639807_s_at | 1637023_at   | 1623086_at   | 1634261_at   |
| 1628503_at   | 1636382_at   | 1635917_at   | 1629041_at   | 1624984_at   | 1627081_at   |
| 1637626_at   | 1636571_at   | 1626984_at   | 1636652_a_at | 1628947_s_at | 1637871_at   |
| 1629246_at   | 1633615_at   | 1628393_at   | 1637314_at   | 1634811_at   | 1624405_a_at |
| 1628617_at   | 1624450_at   | 1638712_at   | 1635355_a_at | 1640980_at   | 1639111_at   |
| 1623203_at   | 1635911_s_at | 1628028_s_at | 1639276_at   | 1628605_at   | 1625048_at   |
| 1639645_at   | 1628767_s_at | 1640870_s_at | 1640084_a_at | 1641614_at   | 1639346_at   |
| 1634334_at   | 1633835_s_at | 1626272_s_at | 1632256_at   | 1632394_s_at | 1627898_at   |
| 1624168_at   | 1641096_s_at | 1636270_at   | 1627665_at   | 1629920_at   | 1623482_at   |
| 1640799_at   | 1634616_at   | 1623879_at   | 1626125_at   | 1624779_at   | 1631293_at   |
| 1635073_at   | 1626108_at   | 1636971_at   | 1634856_at   | 1639495_at   | 1635897_at   |

|              |              |              |              |              |              |
|--------------|--------------|--------------|--------------|--------------|--------------|
| 1634922_s_at | 1633593_s_at | 1632606_a_at | 1631633_a_at | 1639678_at   | 1627778_a_at |
| 1629746_at   | 1634757_a_at | 1636544_at   | 1631525_at   | 1633778_at   | 1625422_at   |
| 1632594_at   | 1630756_at   | 1629001_at   | 1623901_s_at | 1635063_at   | 1633491_s_at |
| 1641522_at   | 1631006_a_at | 1639954_at   | 1628240_at   | 1626947_s_at | 1640211_at   |
| 1635854_s_at | 1634764_at   | 1625031_at   | 1628565_at   | 1626003_s_at | 1634301_at   |
| 1630679_at   | 1623904_a_at | 1633011_at   | 1640185_at   | 1633545_at   | 1627844_at   |
| 1623789_at   | 1632575_at   | 1634095_at   | 1641148_a_at | 1639197_at   | 1627235_at   |
| 1625041_at   | 1632483_at   | 1641068_a_at | 1640584_at   | 1640852_at   | 1631745_at   |
| 1638374_at   | 1634168_s_at | 1627743_at   | 1641449_at   | 1630529_at   | 1640719_at   |
| 1628448_at   | 1624475_at   | 1627245_s_at | 1635616_a_at | 1635881_at   | 1624280_at   |
| 1638548_at   | 1632580_at   | 1639251_at   | 1623448_at   | 1638840_at   | 1638526_a_at |
| 1631621_s_at | 1640073_at   | 1625918_a_at | 1632897_at   | 1631688_at   | 1639115_s_at |
| 1631383_at   | 1634859_at   | 1637399_at   | 1640240_s_at | 1640309_s_at | 1636003_at   |
| 1626786_at   | 1633558_s_at | 1631264_at   | 1627218_a_at | 1633652_at   | 1624529_at   |
| 1632135_a_at | 1636932_at   | 1627589_s_at | 1638325_at   | 1639070_a_at | 1638178_at   |
| 1635830_at   | 1631098_at   | 1632188_at   | 1632590_at   | 1627337_at   | 1639195_a_at |
| 1628186_at   | 1639951_at   | 1634463_at   | 1628959_at   | 1629726_at   | 1639993_at   |
| 1631263_at   | 1624213_at   | 1639744_at   | 1628399_s_at | 1622949_at   | 1626854_at   |
| 1636192_at   | 1624939_at   | 1636988_at   | 1636147_at   | 1629316_at   | 1638387_at   |
| 1623972_a_at | 1640992_at   | 1629795_at   | 1624750_at   | 1627812_s_at | 1632640_at   |
| 1635627_at   | 1628387_s_at | 1625878_at   | 1625633_a_at | 1631935_at   | 1628277_at   |

|              |              |              |              |              |              |
|--------------|--------------|--------------|--------------|--------------|--------------|
| 1638973_s_at | 1632583_at   | 1631015_s_at | 1634265_at   | 1634881_at   | 1629303_at   |
| 1624905_at   | 1628340_s_at | 1637322_at   | 1633625_s_at | 1639243_at   | 1629018_a_at |
| 1623339_at   | 1626693_at   | 1639193_a_at | 1630735_at   | 1631347_at   | 1634197_at   |
| 1623584_at   | 1632803_at   | 1630067_a_at | 1628670_at   | 1633498_at   | 1636019_at   |
| 1641117_a_at | 1625893_a_at | 1625051_at   | 1628681_at   | 1632106_at   | 1624587_at   |
| 1633559_at   | 1627239_s_at | 1623485_at   | 1633389_at   | 1636795_at   | 1639202_a_at |
| 1630199_at   | 1632282_s_at | 1636942_at   | 1626898_at   | 1635361_at   | 1634057_at   |
| 1637866_at   | 1622895_at   | 1641645_at   | 1631218_at   | 1641399_at   | 1625339_at   |
| 1639500_at   | 1631591_at   | 1635027_at   | 1635953_at   | 1635934_at   | 1632335_at   |
| 1623193_at   | 1633858_at   | 1627472_at   | 1628117_at   | 1623744_at   | 1625144_at   |
| 1634722_s_at | 1631313_at   | 1625354_at   | 1638350_at   | 1629395_at   | 1630636_s_at |
| 1623698_s_at | 1629433_at   | 1640552_at   | 1623591_a_at | 1624765_at   | 1639680_at   |
| 1641362_at   | 1641143_s_at | 1637990_s_at | 1636599_at   | 1629867_a_at | 1635857_at   |
| 1631603_at   | 1635794_a_at | 1623231_at   | 1638259_s_at | 1634224_at   | 1623117_at   |
| 1624409_a_at | 1637521_at   | 1638615_s_at | 1622975_at   | 1622971_at   | 1629838_at   |
| 1623408_s_at | 1625863_at   | 1623766_at   | 1628612_at   | 1636341_at   | 1632226_at   |
| 1624663_a_at | 1631994_a_at | 1625337_s_at | 1638782_at   | 1637220_s_at | 1623044_at   |
| 1626506_at   | 1630669_at   | 1631515_at   | 1632427_at   | 1626924_a_at | 1634651_at   |
| 1641579_at   | 1625081_at   | 1638795_at   | 1631304_a_at | 1640460_at   | 1638739_at   |
| 1637549_at   | 1625722_at   | 1640190_at   | 1636812_at   | 1624229_at   | 1635448_at   |
| 1626911_at   | 1626888_at   | 1637951_at   | 1634126_at   | 1624499_s_at | 1629358_s_at |

|              |              |              |              |              |              |
|--------------|--------------|--------------|--------------|--------------|--------------|
| 1634644_at   | 1632581_at   | 1624458_at   | 1624456_at   | 1634178_at   | 1636357_at   |
| 1631106_s_at | 1629685_at   | 1624808_at   | 1628839_at   | 1640317_at   | 1624775_at   |
| 1623241_s_at | 1626710_at   | 1633168_at   | 1624639_at   | 1634239_at   | 1626873_a_at |
| 1624419_a_at | 1638448_at   | 1623992_at   | 1634167_a_at | 1625898_s_at | 1631610_at   |
| 1631820_at   | 1626326_at   | 1637623_at   | 1630050_at   | 1631469_at   | 1625136_s_at |
| 1623862_at   | 1638110_at   | 1641489_at   | 1623595_at   | 1634019_at   | 1637277_at   |
| 1635826_s_at | 1631034_at   | 1630278_s_at | 1623190_at   | 1631047_at   | 1629984_s_at |
| 1624617_at   | 1627056_a_at | 1635547_a_at | 1625486_a_at | 1625521_at   | 1641426_at   |
| 1640618_at   | 1639322_at   | 1636484_at   | 1638527_a_at | 1628114_s_at | 1626864_at   |
| 1627473_at   | 1641003_at   | 1625190_at   | 1628248_at   | 1635128_a_at | 1634271_at   |
| 1633767_at   | 1637368_at   | 1623943_at   | 1639629_at   | 1628829_at   | 1627111_at   |
| 1631308_at   | 1626531_at   | 1640151_at   | 1639295_at   | 1624427_at   | 1631572_at   |
| 1628000_s_at | 1636170_at   | 1637740_at   | 1635521_at   | 1625450_at   | 1637738_at   |
| 1639101_at   | 1630130_at   | 1627605_at   | 1628479_at   | 1631828_s_at | 1640825_a_at |
| 1634281_at   | 1635469_at   | 1633237_at   | 1641313_at   | 1635996_at   | 1634015_s_at |
| 1630396_at   | 1629862_at   | 1637193_at   | 1632636_at   | 1631204_at   | 1624415_s_at |
| 1640565_at   | 1639064_s_at | 1636476_a_at | 1625859_at   | 1627746_at   | 1636237_s_at |
| 1623214_at   | 1631114_a_at | 1639848_at   | 1636227_at   | 1629614_at   | 1637191_at   |
| 1640755_at   | 1640368_at   | 1637060_a_at | 1625141_at   | 1636094_at   | 1631486_at   |
| 1640529_at   | 1627673_at   | 1639955_at   | 1628995_at   | 1637394_s_at | 1623887_at   |
| 1641459_at   | 1630340_at   | 1623819_at   | 1629252_at   | 1640122_at   | 1638438_a_at |



|              |              |              |              |              |              |
|--------------|--------------|--------------|--------------|--------------|--------------|
| 1639976_at   | 1640599_at   | 1627180_at   | 1628427_a_at | 1639034_at   | 1634636_at   |
| 1635160_at   | 1640560_at   | 1637068_at   | 1635607_at   | 1635454_a_at | 1635714_s_at |
| 1633883_at   | 1641444_a_at | 1625566_a_at | 1623377_at   | 1626766_s_at | 1634331_at   |
| 1639737_at   | 1624678_at   | 1636512_s_at | 1626717_at   | 1630366_at   | 1635446_at   |
| 1635421_at   | 1640170_at   | 1639968_at   | 1637809_at   | 1623463_at   | 1630395_at   |
| 1627659_at   | 1629027_at   | 1624380_at   | 1631672_at   | 1636894_s_at | 1638183_at   |
| 1625966_at   | 1640233_at   | 1629021_at   | 1639698_at   | 1636193_at   | 1634784_at   |
| 1635824_at   | 1625772_at   | 1638637_at   | 1641476_a_at | 1636837_at   | 1623353_at   |
| 1629792_at   | 1628667_at   | 1640818_at   | 1641031_s_at | 1623770_at   | 1640109_at   |
| 1626933_s_at | 1626768_at   | 1626133_s_at | 1640782_at   | 1630388_at   | 1623138_at   |
| 1636614_a_at | 1633361_at   | 1632176_at   | 1630753_at   | 1629943_at   | 1630723_a_at |
| 1623903_at   | 1628759_a_at | 1640187_a_at | 1631148_at   | 1634988_a_at | 1622928_at   |
| 1638130_at   | 1627638_s_at | 1639662_at   | 1632971_at   | 1639898_at   | 1630851_s_at |
| 1639391_at   | 1639633_at   | 1640999_at   | 1629409_s_at | 1639642_a_at | 1626964_at   |
| 1635951_at   | 1624118_at   | 1629603_at   | 1631330_at   | 1625714_a_at | 1632139_at   |
| 1634003_at   | 1631168_at   | 1636602_at   | 1628649_at   | 1633080_at   | 1627781_at   |
| 1629558_at   | 1630264_at   | 1634898_a_at | 1635051_a_at | 1625608_at   | 1627894_s_at |
| 1627682_at   | 1641101_at   | 1641534_at   | 1628312_at   | 1629327_at   | 1625879_at   |
| 1626231_at   | 1641532_at   | 1625631_at   | 1623439_at   | 1624483_at   | 1629462_at   |
| 1631915_at   | 1633490_at   | 1627832_at   | 1625824_at   | 1635629_at   | 1631848_at   |
| 1624792_at   | 1627680_at   | 1627910_s_at | 1627099_at   | 1627055_at   | 1639403_s_at |

|              |              |              |              |              |              |
|--------------|--------------|--------------|--------------|--------------|--------------|
| 1625590_a_at | 1631009_at   | 1631602_at   | 1625016_at   | 1623746_a_at | 1632688_s_at |
| 1623587_at   | 1622921_at   | 1636743_s_at | 1636009_at   | 1631740_at   | 1627271_at   |
| 1627078_at   | 1635725_a_at | 1640774_a_at | 1631767_at   | 1634492_s_at | 1641366_at   |
| 1627643_at   | 1638229_at   | 1639950_at   | 1627873_at   | 1631931_s_at | 1632247_at   |
| 1636242_at   | 1633754_at   | 1627364_s_at | 1626332_s_at | 1638748_at   | 1640765_at   |
| 1624073_at   | 1636098_at   | 1634230_s_at | 1639519_at   | 1624581_at   | 1633335_at   |
| 1623539_at   | 1629473_at   | 1641737_a_at | 1627865_a_at | 1639152_at   | 1634979_at   |
| 1627967_a_at | 1628663_s_at | 1638217_at   | 1622940_at   | 1628601_at   | 1623699_a_at |
| 1635552_s_at | 1627729_s_at | 1627660_a_at | 1636717_at   | 1624919_at   | 1639598_at   |
| 1624877_at   | 1624435_at   | 1640454_at   | 1631368_s_at | 1625674_at   | 1636412_at   |
| 1631288_at   | 1629401_s_at | 1635550_at   | 1633998_s_at | 1637383_at   | 1623134_at   |
| 1636852_at   | 1634174_at   | 1629921_a_at | 1633912_at   | 1624192_at   | 1628011_a_at |
| 1626810_at   | 1641685_at   | 1629629_at   | 1638162_s_at | 1630630_at   | 1627733_at   |
| 1623926_at   | 1630003_at   | 1632179_at   | 1625540_at   | 1624628_at   | 1639712_at   |
| 1636816_s_at | 1640655_s_at | 1634619_at   | 1626781_at   | 1628673_at   | 1637963_at   |
| 1637601_at   | 1634615_at   | 1632422_s_at | 1631077_at   | 1640336_at   | 1623094_at   |
| 1627492_at   | 1640215_at   | 1638427_at   | 1633074_a_at | 1638693_s_at | 1640954_at   |
| 1627433_at   | 1639057_at   | 1628204_at   | 1628459_at   | 1640548_at   | 1632171_a_at |
| 1637050_at   | 1625340_at   | 1639957_s_at | 1640126_at   | 1623206_a_at | 1635903_at   |
| 1627829_at   | 1630798_at   | 1639567_at   | 1633967_at   | 1632855_at   | 1629189_at   |
| 1634204_at   | 1633923_at   | 1640998_at   | 1636262_at   | 1640492_at   | 1629468_at   |

|              |              |              |              |              |              |
|--------------|--------------|--------------|--------------|--------------|--------------|
| 1635528_s_at | 1628981_at   | 1628997_at   | 1640269_at   | 1624332_s_at | 1625137_at   |
| 1634081_at   | 1632465_s_at | 1632800_at   | 1627916_s_at | 1628968_at   | 1631179_s_at |
| 1628035_at   | 1623573_s_at | 1636589_s_at | 1640867_s_at | 1629151_at   | 1631653_at   |
| 1641610_at   | 1624906_at   | 1628364_at   | 1628901_at   | 1637546_at   | 1636356_at   |
| 1629784_a_at | 1640382_at   | 1636851_at   | 1634100_at   | 1638618_a_at | 1625923_s_at |
| 1636525_at   | 1640881_at   | 1627447_at   | 1633004_at   | 1635281_at   | 1636087_at   |
| 1633079_at   | 1638839_at   | 1624027_at   | 1630673_at   | 1636896_a_at | 1639903_at   |
| 1632702_at   | 1628352_a_at | 1632194_at   | 1632381_at   | 1627945_at   | 1640602_s_at |
| 1630001_at   | 1627779_at   | 1640020_at   | 1627983_at   | 1633771_s_at | 1636109_at   |
| 1634068_at   | 1627009_at   | 1640574_at   | 1633113_at   | 1630024_at   | 1632882_at   |
| 1623320_at   | 1625585_at   | 1641462_at   | 1627925_at   | 1625960_at   | 1627863_at   |
| 1634692_at   | 1629956_at   | 1634128_at   | 1628627_at   | 1631447_at   | 1628295_at   |
| 1625317_at   | 1628574_at   | 1624991_at   | 1641142_at   | 1632714_at   | 1624060_at   |
| 1633784_at   | 1637589_at   | 1624208_s_at | 1629663_at   | 1631244_a_at | 1628557_at   |
| 1626123_at   | 1631815_at   | 1634801_at   | 1639817_at   | 1624938_at   | 1631282_at   |
| 1640349_at   | 1627575_at   | 1631877_a_at | 1636130_at   | 1638882_at   | 1627431_at   |
| 1630988_at   | 1628788_a_at | 1629096_at   | 1641530_s_at | 1623115_at   | 1628832_s_at |
| 1635239_at   | 1628608_at   | 1630539_at   | 1629870_at   | 1639554_at   | 1623644_s_at |
| 1639309_at   | 1637621_at   | 1630794_at   | 1625095_at   | 1627458_at   | 1623286_at   |
| 1632521_at   | 1637954_at   | 1628775_s_at | 1627813_at   | 1636807_at   | 1633212_s_at |
| 1626215_at   | 1639168_at   | 1634992_s_at | 1628260_at   | 1637620_s_at | 1641553_at   |

|              |              |              |              |              |              |
|--------------|--------------|--------------|--------------|--------------|--------------|
| 1622939_at   | 1631363_at   | 1640278_at   | 1640967_at   | 1624831_at   | 1629239_s_at |
| 1628243_at   | 1635201_at   | 1630737_at   | 1631270_at   | 1630699_at   | 1624719_at   |
| 1637526_s_at | 1623686_at   | 1627240_at   | 1634316_at   | 1636119_at   | 1630258_at   |
| 1624595_a_at | 1626073_a_at | 1628507_at   | 1640076_at   | 1638603_at   | 1632589_at   |
| 1626798_a_at | 1628686_a_at | 1627796_s_at | 1629365_at   | 1631578_s_at | 1635157_at   |
| 1637138_at   | 1636269_at   | 1636446_at   | 1625439_at   | 1625533_at   | 1635435_at   |
| 1632850_at   | 1636900_at   | 1639375_a_at | 1634738_s_at | 1626175_at   | 1635874_at   |
| 1632261_at   | 1641600_at   | 1630093_at   | 1631757_at   | 1627677_s_at | 1628422_s_at |
| 1629751_at   | 1633061_at   | 1640108_at   | 1623590_s_at | 1638456_at   | 1634359_a_at |
| 1634983_s_at | 1636322_at   | 1637980_at   | 1633906_at   | 1624583_at   | 1628428_at   |
| 1629319_at   | 1639189_at   | 1639622_at   | 1631174_at   | 1624504_s_at | 1639607_at   |
| 1625683_at   | 1628111_at   | 1633194_at   | 1635118_at   | 1626148_at   | 1623346_at   |
| 1632338_a_at | 1638204_s_at | 1623888_at   | 1641386_at   | 1639762_at   | 1638334_at   |
| 1636160_at   | 1640716_at   | 1640485_at   | 1640801_at   | 1640086_at   | 1636711_at   |
| 1638980_at   | 1628729_at   | 1624653_at   | 1626010_at   | 1639779_at   | 1636330_at   |
| 1625220_at   | 1632999_at   | 1626344_at   | 1627340_at   | 1638397_at   | 1637007_s_at |
| 1626425_at   | 1636426_at   | 1623873_at   | 1641702_at   | 1632662_at   | 1639015_s_at |
| 1627292_at   | 1632019_s_at | 1628092_at   | 1633362_at   | 1628180_at   | 1640455_a_at |
| 1636286_at   | 1637625_s_at | 1630950_at   | 1626689_at   | 1623792_a_at | 1637795_at   |
| 1631062_at   | 1640532_at   | 1638351_s_at | 1625047_at   | 1638659_at   | 1623248_s_at |
| 1625502_at   | 1633704_at   | 1623465_at   | 1630149_at   | 1638582_at   | 1637267_at   |

|              |              |              |              |              |              |
|--------------|--------------|--------------|--------------|--------------|--------------|
| 1633776_s_at | 1636080_a_at | 1635969_at   | 1632761_at   | 1627254_at   | 1629479_a_at |
| 1632730_at   | 1625626_at   | 1629431_at   | 1638640_at   | 1635155_a_at | 1636401_a_at |
| 1623997_s_at | 1641745_a_at | 1637284_at   | 1631326_at   | 1639471_s_at | 1623856_at   |
| 1629884_at   | 1636468_a_at | 1630999_at   | 1623118_s_at | 1635303_at   | 1627716_at   |
| 1626747_at   | 1637124_at   | 1627539_at   | 1640679_at   | 1633287_at   | 1635482_at   |
| 1623993_at   | 1627003_at   | 1634629_at   | 1628987_at   | 1625990_at   | 1631756_at   |
| 1639037_at   | 1630675_at   | 1632462_at   | 1638053_at   | 1628706_at   | 1625595_a_at |
| 1630172_at   | 1635927_at   | 1632621_at   | 1627597_at   | 1637662_at   | 1636016_at   |
| 1628016_s_at | 1629148_a_at | 1635631_a_at | 1627168_at   | 1635382_at   | 1631631_at   |
| 1626503_at   | 1626468_a_at | 1634969_at   | 1626257_at   | 1623670_at   | 1630227_a_at |
| 1636515_at   | 1631869_at   | 1641485_at   | 1637453_at   | 1640123_at   | 1630555_at   |
| 1631763_at   | 1635773_at   | 1625469_at   | 1625004_at   | 1625425_a_at | 1634302_s_at |
| 1634402_at   | 1624744_a_at | 1633680_at   | 1630312_s_at | 1626307_at   | 1633651_at   |
| 1624338_at   | 1635944_a_at | 1630263_at   | 1625145_a_at | 1635671_at   | 1623554_at   |
| 1638699_at   | 1626438_at   | 1625567_a_at | 1626561_at   | 1624363_at   | 1628017_a_at |
| 1625822_at   | 1640401_at   | 1639191_at   | 1627890_at   | 1631172_at   | 1625022_a_at |
| 1629923_at   | 1634127_a_at | 1629888_at   | 1639344_at   | 1624902_at   | 1638282_at   |
| 1627973_s_at | 1639952_at   | 1635549_at   | 1634845_at   | 1624296_at   | 1628435_at   |
| 1640525_a_at | 1628275_at   | 1630768_s_at | 1627004_at   | 1640930_at   | 1631321_s_at |
| 1640067_at   | 1623557_at   | 1623407_at   | 1633916_at   | 1624134_a_at | 1635508_at   |
| 1641102_at   | 1629217_at   | 1625348_s_at | 1626858_a_at | 1637447_at   | 1626613_at   |

|              |              |              |              |              |              |
|--------------|--------------|--------------|--------------|--------------|--------------|
| 1641006_s_at | 1625114_at   | 1624638_a_at | 1628281_at   | 1631286_at   | 1635240_at   |
| 1625514_s_at | 1635923_at   | 1628669_at   | 1641348_at   | 1623501_at   | 1627022_at   |
| 1637994_at   | 1641632_at   | 1630270_s_at | 1629752_at   | 1627028_at   | 1633805_a_at |
| 1631067_at   | 1633574_at   | 1632264_at   | 1628604_at   | 1640281_s_at | 1628476_at   |
| 1635632_at   | 1635572_at   | 1627339_at   | 1641170_a_at | 1640426_at   | 1633369_s_at |
| 1626906_at   | 1630076_at   | 1632332_at   | 1637713_at   | 1633301_at   | 1634362_a_at |
| 1627439_at   | 1628991_at   | 1635248_at   | 1625869_at   | 1628998_at   | 1629546_at   |
| 1640201_at   | 1625465_a_at | 1628694_a_at | 1627566_a_at | 1641516_at   | 1641722_at   |
| 1639748_at   | 1629886_s_at | 1628109_at   | 1638846_at   | 1637198_at   | 1637847_at   |
| 1624287_at   | 1632458_at   | 1639147_s_at | 1632584_at   | 1623175_at   | 1628258_at   |
| 1634882_at   | 1635269_at   | 1631083_at   | 1629122_at   | 1631344_at   | 1633466_at   |
| 1630469_a_at | 1626482_a_at | 1636523_at   | 1638311_at   | 1624139_at   | 1624378_at   |
| 1623438_at   | 1633962_a_at | 1631393_at   | 1626197_at   | 1630370_at   | 1630327_at   |
| 1638652_at   | 1638235_at   | 1632756_at   | 1626522_at   | 1630487_s_at | 1624389_at   |
| 1641384_a_at | 1625263_at   | 1625850_at   | 1641465_at   | 1627209_at   | 1635335_at   |
| 1629023_s_at | 1635305_s_at | 1629848_s_at | 1638140_at   | 1625126_at   | 1632484_at   |
| 1631867_at   | 1623122_at   | 1637048_at   | 1633128_at   | 1639677_at   | 1640751_at   |
| 1641471_at   | 1627551_s_at | 1636866_at   | 1635293_s_at | 1634008_at   | 1633170_at   |
| 1636920_s_at | 1628957_at   | 1626096_at   | 1623535_at   | 1636368_at   | 1623119_at   |
| 1629400_at   | 1639372_s_at | 1634927_at   | 1626444_at   | 1626829_s_at | 1633282_at   |
| 1627564_s_at | 1636556_at   | 1627697_at   | 1631593_at   | 1629569_at   | 1637110_at   |

|              |              |              |              |              |              |
|--------------|--------------|--------------|--------------|--------------|--------------|
| 1633821_at   | 1633823_at   | 1631812_at   | 1636207_at   | 1624158_at   | 1639109_a_at |
| 1626418_a_at | 1628438_at   | 1637787_a_at | 1638494_at   | 1640361_at   | 1636218_at   |
| 1638092_a_at | 1630907_at   | 1634482_at   | 1623633_at   | 1640822_s_at | 1626965_at   |
| 1627435_at   | 1641262_at   | 1625330_at   | 1624870_at   | 1628631_at   | 1627421_at   |
| 1633102_at   | 1628072_at   | 1630416_at   | 1635595_at   | 1625986_at   | 1626834_at   |
| 1640897_at   | 1641103_at   | 1628337_at   | 1630683_at   | 1623182_at   | 1630663_a_at |
| 1632912_s_at | 1641456_at   | 1635177_at   | 1631909_at   | 1625925_at   | 1624981_a_at |
| 1629690_at   | 1639552_s_at | 1629708_at   | 1625204_a_at | 1623100_at   | 1632804_at   |
| 1623689_a_at | 1627133_at   | 1637723_at   | 1626684_at   | 1634572_at   | 1631385_at   |
| 1640495_at   | 1629153_s_at | 1635815_at   | 1624124_at   | 1639630_at   | 1628128_at   |
| 1635523_a_at | 1625609_at   | 1623695_a_at | 1630265_at   | 1639949_s_at | 1635409_at   |
| 1624007_at   | 1640673_at   | 1628570_at   | 1636457_at   | 1639614_s_at | 1629005_a_at |
| 1628871_at   | 1640082_at   | 1623672_at   | 1623556_at   | 1632634_at   | 1630102_at   |
| 1626602_at   | 1624559_a_at | 1640104_at   | 1641089_s_at | 1635175_at   | 1623874_at   |
| 1624236_at   | 1638201_at   | 1635099_at   | 1635358_at   | 1628423_at   | 1636490_at   |
| 1626845_at   | 1639667_at   | 1630447_at   | 1636182_a_at | 1632724_at   | 1633860_at   |
| 1623853_at   | 1630089_at   | 1626622_at   | 1630780_a_at | 1624307_at   | 1632980_at   |
| 1632655_at   | 1624688_at   | 1630096_at   | 1635327_at   | 1633665_at   | 1641620_s_at |
| 1624890_s_at | 1639775_at   | 1630677_at   | 1622981_at   | 1631755_at   | 1634082_at   |
| 1638119_at   | 1633943_at   | 1634598_a_at | 1627131_at   | 1623543_at   | 1636039_at   |
| 1640044_at   | 1634503_at   | 1625325_s_at | 1628429_at   | 1630566_at   | 1631458_at   |

|              |              |              |              |              |              |
|--------------|--------------|--------------|--------------|--------------|--------------|
| 1634628_at   | 1629091_at   | 1623531_at   | 1635633_s_at | 1626278_at   | 1638113_at   |
| 1641192_at   | 1636308_at   | 1638439_a_at | 1634319_at   | 1623293_at   | 1626037_at   |
| 1631480_at   | 1636299_at   | 1634917_at   | 1634746_at   | 1627532_at   | 1629040_at   |
| 1632802_at   | 1630453_at   | 1636364_a_at | 1623433_at   | 1629410_at   | 1640921_at   |
| 1625488_s_at | 1631733_at   | 1634515_at   | 1627901_a_at | 1631833_at   | 1633723_at   |
| 1636161_at   | 1633479_a_at | 1639319_at   | 1640214_at   | 1640415_at   | 1631379_a_at |
| 1640466_s_at | 1636978_at   | 1640559_at   | 1629584_at   | 1629678_a_at | 1625951_at   |
| 1632615_at   | 1636056_at   | 1637256_at   | 1639644_at   | 1633331_at   | 1639246_at   |
| 1636064_at   | 1636520_s_at | 1628504_at   | 1636234_at   | 1628362_s_at | 1629881_at   |
| 1633398_at   | 1640468_a_at | 1627333_at   | 1623638_a_at | 1625214_at   | 1636168_s_at |
| 1636373_at   | 1635718_at   | 1632152_at   | 1638874_at   | 1636868_at   | 1639782_at   |
| 1624658_at   | 1626433_at   | 1637602_at   | 1629661_at   | 1625904_at   | 1628643_at   |
| 1636092_a_at | 1633464_at   | 1636784_at   | 1631676_at   | 1633701_at   | 1629743_at   |
| 1629324_at   | 1638382_at   | 1630165_s_at | 1632736_at   | 1627470_at   | 1634201_at   |
| 1622956_at   | 1626556_at   | 1638898_at   | 1634244_s_at | 1638133_at   | 1636943_s_at |
| 1624932_at   | 1624353_at   | 1631940_s_at | 1634214_a_at | 1624262_at   | 1635596_at   |
| 1637887_at   | 1626657_a_at | 1639201_at   | 1630056_at   | 1623579_at   | 1624772_at   |
| 1633220_at   | 1633985_at   | 1627109_at   | 1637440_at   | 1637584_at   | 1637654_at   |
| 1625706_at   | 1634108_at   | 1624564_s_at | 1626248_at   | 1624732_at   | 1628516_at   |
| 1636811_at   | 1630064_at   | 1636575_s_at | 1623914_at   | 1632717_a_at | 1627944_a_at |
| 1639874_at   | 1635853_at   | 1639270_at   | 1634855_s_at | 1630685_at   | 1633451_at   |



|              |              |              |              |              |              |
|--------------|--------------|--------------|--------------|--------------|--------------|
| 1638568_s_at | 1634313_s_at | 1633310_at   | 1624644_a_at | 1627211_at   | 1629188_at   |
| 1623928_at   | 1638121_at   | 1636406_at   | 1635143_at   | 1625413_s_at | 1625862_x_at |
| 1641315_at   | 1634113_at   | 1639522_at   | 1639259_at   | 1641204_at   | 1632083_at   |
| 1624284_a_at | 1636464_at   | 1632829_at   | 1629859_s_at | 1632811_at   | 1634705_at   |
| 1631279_at   | 1625889_at   | 1627105_at   | 1623842_a_at | 1637600_at   | 1636048_at   |
| 1638513_s_at | 1626570_s_at | 1633022_at   | 1630977_at   | 1637509_s_at | 1639029_at   |
| 1641708_at   | 1627744_at   | 1630995_at   | 1641197_at   | 1634833_at   | 1635628_s_at |
| 1623814_at   | 1625758_s_at | 1632872_at   | 1624272_at   | 1627101_at   | 1634079_at   |
| 1627409_at   | 1625050_s_at | 1625164_at   | 1626276_at   | 1629257_s_at | 1640966_at   |
| 1629417_s_at | 1639488_at   | 1632246_at   | 1631565_a_at | 1630779_s_at | 1625499_at   |
| 1627020_at   | 1629844_s_at | 1628274_a_at | 1627966_s_at | 1637848_at   | 1633800_s_at |
| 1633147_at   | 1623294_at   | 1624143_a_at | 1627371_at   | 1636305_a_at | 1623891_at   |
| 1624551_at   | 1630657_at   | 1623365_at   | 1635427_a_at | 1623436_a_at | 1624301_at   |
| 1629418_s_at | 1638964_at   | 1640512_at   | 1641703_at   | 1634514_at   | 1634509_s_at |
| 1640297_at   | 1635863_at   | 1627693_at   | 1637679_s_at | 1625767_at   | 1641289_at   |
| 1636176_at   | 1638581_at   | 1631783_at   | 1635268_at   | 1626565_at   | 1624586_a_at |
| 1623864_at   | 1626619_at   | 1639892_at   | 1636125_a_at | 1633578_a_at | 1627999_s_at |
| 1624717_s_at | 1626441_at   | 1634650_at   | 1634321_s_at | 1636666_at   | 1630457_s_at |
| 1624957_a_at | 1625291_s_at | 1623322_at   | 1632220_s_at | 1634814_at   | 1637574_at   |
| 1624478_at   | 1640922_a_at | 1630559_at   | 1637180_at   | 1624901_at   | 1636898_at   |
| 1622892_s_at | 1638851_at   | 1634976_at   | 1623340_at   | 1623257_a_at | 1640479_at   |

|              |              |              |              |              |              |
|--------------|--------------|--------------|--------------|--------------|--------------|
| 1639218_s_at | 1624751_at   | 1630703_at   | 1623783_at   | 1639365_at   | 1625199_s_at |
| 1629378_at   | 1633885_s_at | 1639377_at   | 1630323_at   | 1632782_a_at | 1626536_at   |
| 1637022_at   | 1641011_at   | 1638883_at   | 1622917_a_at | 1635310_s_at | 1626404_a_at |
| 1635667_at   | 1636822_s_at | 1635237_at   | 1628256_at   | 1637904_at   | 1634614_at   |
| 1638762_at   | 1637041_a_at | 1634155_at   | 1624420_at   | 1637328_at   | 1636084_at   |
| 1629911_at   | 1624624_at   | 1640373_at   | 1627110_at   | 1631195_at   | 1638524_s_at |
| 1639074_at   | 1629789_at   | 1626945_at   | 1624502_a_at | 1634295_at   | 1625020_at   |
| 1629549_s_at | 1623542_at   | 1637141_at   | 1626399_at   | 1629007_at   | 1641075_at   |
| 1632818_at   | 1636698_at   | 1637327_at   | 1634282_s_at | 1627737_at   | 1641215_s_at |
| 1631325_at   | 1638828_a_at | 1634994_a_at | 1628112_at   | 1627911_at   | 1633532_at   |
| 1631333_s_at | 1633512_at   | 1631738_at   | 1630667_at   | 1627204_at   | 1636266_at   |
| 1630715_at   | 1630358_at   | 1635587_s_at | 1637782_at   | 1628984_s_at | 1631346_a_at |
| 1633042_at   | 1632402_at   | 1635013_s_at | 1626879_at   | 1623969_at   | 1626881_at   |
| 1640344_at   | 1623813_at   | 1628474_at   | 1640938_at   | 1629163_at   | 1638664_s_at |
| 1638598_at   | 1634934_at   | 1633598_at   | 1636248_at   | 1623165_at   | 1629313_at   |
| 1640019_at   | 1641363_at   | 1625607_s_at | 1639787_at   | 1640055_at   | 1628660_at   |
| 1628716_at   | 1632834_a_at | 1636620_s_at | 1624916_a_at | 1627798_at   | 1638446_a_at |
| 1635946_at   | 1628644_at   | 1623422_a_at | 1631644_at   | 1631790_at   | 1623295_at   |
| 1634711_at   | 1640217_at   | 1632765_at   | 1640650_at   | 1633154_at   | 1637746_at   |
| 1627741_at   | 1632946_at   | 1625184_at   | 1632835_at   | 1635056_at   | 1625568_a_at |
| 1640218_at   | 1637741_a_at | 1635727_a_at | 1627305_at   | 1627221_at   | 1637854_at   |

|              |              |              |              |              |              |
|--------------|--------------|--------------|--------------|--------------|--------------|
| 1635046_at   | 1630373_at   | 1626664_at   | 1623857_at   | 1636502_at   | 1633654_s_at |
| 1636957_s_at | 1641463_at   | 1632168_at   | 1638858_at   | 1626797_a_at | 1640237_a_at |
| 1629889_s_at | 1631467_at   | 1631942_at   | 1633794_a_at | 1633618_at   | 1638005_s_at |
| 1628974_at   | 1633934_at   | 1633763_at   | 1628711_at   | 1640976_at   | 1637136_at   |
| 1638800_a_at | 1627426_at   | 1625394_at   | 1622957_s_at | 1627373_at   | 1624632_at   |
| 1625650_at   | 1635110_at   | 1637107_at   | 1628980_s_at | 1634866_at   | 1638861_at   |
| 1637169_at   | 1623150_at   | 1630896_at   | 1640600_at   | 1624824_at   | 1623459_at   |
| 1640582_at   | 1640507_s_at | 1638520_at   | 1630455_at   | 1630365_at   | 1633477_at   |
| 1629104_at   | 1629854_at   | 1624637_at   | 1626076_at   | 1631434_at   | 1626006_at   |
| 1625487_at   | 1625922_a_at | 1637774_s_at | 1633643_a_at | 1638758_at   | 1634962_s_at |
| 1631772_a_at | 1630087_at   | 1625519_at   | 1633450_at   | 1627134_at   | 1634640_at   |
| 1635647_at   | 1629948_at   | 1639093_s_at | 1632095_at   | 1635054_at   | 1625675_a_at |
| 1633057_at   | 1637415_at   | 1629715_at   | 1636849_at   | 1639436_at   | 1634080_at   |
| 1635694_at   | 1640789_a_at | 1641556_a_at | 1641400_at   | 1636128_at   | 1630273_at   |
| 1638908_at   | 1638185_at   | 1628257_s_at | 1634900_at   | 1628169_at   | 1637763_a_at |
| 1637983_s_at | 1639341_at   | 1627118_at   | 1640229_at   | 1622982_at   | 1629574_at   |
| 1637647_at   | 1623836_at   | 1629240_at   | 1624892_s_at | 1622979_a_at | 1626002_at   |
| 1626052_at   | 1631367_at   | 1623896_a_at | 1624605_at   | 1627059_at   | 1639079_at   |
| 1634118_at   | 1627749_at   | 1636921_at   | 1629207_at   | 1634405_s_at | 1641564_a_at |
| 1638939_at   | 1634182_at   | 1635872_at   | 1639253_at   | 1625060_at   | 1637811_s_at |
| 1627997_at   | 1633067_at   | 1628811_at   | 1623032_at   | 1625816_at   | 1628325_at   |

|            |              |              |              |              |              |
|------------|--------------|--------------|--------------|--------------|--------------|
| 1625365_at | 1630682_at   | 1641027_at   | 1631022_at   | 1636253_at   | 1624330_s_at |
| 1631806_at | 1635758_s_at | 1640169_s_at | 1638274_s_at | 1631101_at   | 1627050_at   |
| 1633196_at | 1633669_at   | 1623288_at   | 1635300_at   | 1633960_at   | 1628800_at   |
| 1627553_at | 1637515_s_at | 1633604_at   | 1636296_at   | 1629972_at   | 1625640_a_at |
| 1633234_at | 1635498_at   | 1624291_at   | 1635971_at   | 1633435_a_at |              |

\*\*\*\*\*

Inb Effects DOWN regulated FDR < 0.1

|              |              |              |              |              |              |
|--------------|--------------|--------------|--------------|--------------|--------------|
| 1626166_at   | 1634009_at   | 1623867_at   | 1626893_at   | 1625154_s_at | 1626645_at   |
| 1637239_s_at | 1627835_a_at | 1634439_at   | 1639838_at   | 1640501_at   | 1637900_at   |
| 1639229_at   | 1634418_at   | 1628712_at   | 1632032_at   | 1633690_at   | 1632011_at   |
| 1628261_at   | 1623068_at   | 1641581_at   | 1623452_at   | 1625116_at   | 1640059_at   |
| 1630670_at   | 1639823_at   | 1640681_at   | 1632328_at   | 1641324_at   | 1630430_a_at |
| 1625297_at   | 1639130_a_at | 1632666_at   | 1624525_at   | 1639351_at   | 1641442_a_at |
| 1631387_at   | 1635793_at   | 1637077_s_at | 1633355_at   | 1625761_a_at | 1632854_s_at |
| 1640285_at   | 1634165_at   | 1625409_at   | 1633033_s_at | 1633882_at   | 1640715_at   |
| 1623019_a_at | 1635639_a_at | 1633303_at   | 1625400_at   | 1639469_a_at | 1631639_at   |
| 1631522_x_at | 1637366_at   | 1639317_at   | 1629919_at   | 1637113_s_at | 1634036_at   |
| 1638554_at   | 1639439_at   | 1623238_at   | 1639110_at   | 1637483_at   | 1640892_a_at |
| 1637123_a_at | 1637103_at   | 1637701_at   | 1629885_at   | 1632434_at   | 1640107_at   |
| 1628398_at   | 1641558_at   | 1632964_at   | 1632432_at   | 1630515_s_at | 1638207_at   |
| 1630150_s_at | 1630171_at   | 1640223_a_at | 1636338_at   | 1631280_at   | 1633740_at   |
| 1624035_a_at | 1624121_at   | 1625183_at   | 1640181_at   | 1630252_at   | 1633272_at   |
| 1627583_at   | 1629559_s_at | 1623757_at   | 1626709_at   | 1630065_at   | 1624979_at   |
| 1630402_at   | 1637391_at   | 1630261_a_at | 1638733_at   | 1637504_at   | 1637194_at   |
| 1626953_at   | 1624982_s_at | 1625210_a_at | 1631285_at   | 1641325_s_at | 1640224_s_at |
| 1639979_at   | 1638240_s_at | 1641607_at   | 1637914_at   | 1623160_at   | 1628080_at   |
| 1638327_a_at | 1641413_s_at | 1637097_at   | 1639636_at   | 1631217_a_at | 1624705_a_at |

|              |              |              |              |              |              |
|--------------|--------------|--------------|--------------|--------------|--------------|
| 1625588_s_at | 1638004_at   | 1639418_at   | 1634846_a_at | 1626016_s_at | 1633167_s_at |
| 1636775_at   | 1639928_a_at | 1637645_at   | 1624830_at   | 1624488_a_at | 1633400_at   |
| 1625071_a_at | 1624398_at   | 1630085_s_at | 1623693_a_at | 1629551_s_at | 1627986_s_at |
| 1626429_at   | 1630100_at   | 1640629_s_at | 1622974_at   | 1623234_s_at | 1632527_at   |
| 1623490_at   | 1635252_a_at | 1640462_at   | 1641291_at   | 1629077_s_at | 1635460_a_at |
| 1638896_at   | 1623984_s_at | 1632091_at   | 1635253_a_at | 1634955_at   | 1624826_at   |
| 1631474_s_at | 1634269_at   | 1626442_at   | 1634075_at   | 1639252_s_at | 1624157_at   |
| 1634739_a_at | 1633285_at   | 1637335_at   | 1635483_at   | 1626397_at   | 1633434_at   |
| 1631380_s_at | 1627352_at   | 1632967_s_at | 1623200_at   | 1629317_at   | 1630044_s_at |
| 1627394_s_at | 1623252_a_at | 1625542_a_at | 1623517_at   | 1640798_a_at | 1635140_at   |
| 1632475_at   | 1631620_at   | 1636028_at   | 1623851_at   | 1637801_at   | 1623037_a_at |
| 1623558_at   | 1633696_at   | 1635025_a_at | 1629235_s_at | 1635936_at   | 1632932_a_at |
| 1634440_s_at | 1638400_at   | 1633452_a_at | 1633344_at   | 1624774_a_at | 1627818_s_at |
| 1638475_a_at | 1631628_s_at | 1630501_a_at | 1632757_a_at | 1634162_at   | 1623083_at   |
| 1632898_at   | 1629538_s_at | 1630231_at   | 1637634_at   | 1634188_a_at | 1630707_at   |
| 1632380_at   | 1627287_at   | 1631925_at   | 1638472_at   | 1625908_a_at | 1629318_at   |
| 1638079_at   | 1624432_at   | 1634707_s_at | 1641018_s_at | 1634063_a_at | 1623445_at   |
| 1626294_a_at | 1640991_at   | 1624340_at   | 1639778_at   | 1634156_at   | 1634906_at   |
| 1628105_a_at | 1635398_at   | 1631302_at   | 1636274_at   | 1640754_at   | 1629423_at   |
| 1629876_at   | 1631724_s_at | 1631468_a_at | 1633481_at   | 1635678_at   | 1628766_at   |
| 1641310_at   | 1641109_at   | 1639596_at   | 1633264_at   | 1635161_at   | 1616608_a_at |

|              |              |              |              |              |              |
|--------------|--------------|--------------|--------------|--------------|--------------|
| 1635208_at   | 1626740_at   | 1632705_at   | 1641167_s_at | 1638009_s_at | 1630156_at   |
| 1635584_s_at | 1625312_at   | 1623225_s_at | 1638892_at   | 1624505_at   | 1632204_at   |
| 1634310_at   | 1641598_at   | 1637548_at   | 1638276_at   | 1636813_s_at | 1639513_at   |
| 1633293_at   | 1636414_at   | 1630169_a_at | 1641171_at   | 1627927_at   | 1630695_at   |
| 1627493_at   | 1633480_at   | 1626521_x_at | 1627893_at   | 1629553_at   | 1638940_at   |
| 1625752_at   | 1634417_s_at | 1627962_at   | 1640235_at   | 1629065_s_at | 1638368_at   |
| 1629446_at   | 1630957_s_at | 1623212_s_at | 1634144_at   | 1637792_at   | 1624310_s_at |
| 1638067_a_at | 1638044_a_at | 1632119_s_at | 1633463_s_at | 1630129_at   | 1640303_a_at |
| 1623151_a_at | 1637943_at   | 1624776_a_at | 1628235_at   | 1624219_s_at | 1641474_s_at |
| 1640526_at   | 1638681_at   | 1637538_s_at | 1626088_at   | 1638050_s_at | 1637412_a_at |
| 1626473_a_at | 1630201_a_at | 1634374_at   | 1625992_s_at | 1623624_at   | 1634893_at   |
| 1624929_at   | 1630589_at   | 1636747_at   | 1640322_at   | 1638008_s_at | 1634447_at   |
| 1636461_at   | 1623827_a_at | 1641333_s_at | 1627632_at   | 1629342_s_at | 1640286_at   |
| 1628909_at   | 1639592_at   | 1637813_at   | 1637421_at   | 1629015_a_at | 1635072_at   |
| 1623957_s_at | 1639637_a_at | 1638365_at   | 1623177_at   | 1637545_at   | 1636626_s_at |
| 1630575_at   | 1634684_at   | 1630160_at   | 1639033_at   | 1630698_at   | 1629396_a_at |
| 1626446_a_at | 1640854_at   | 1631524_a_at | 1626700_at   | 1638810_at   | 1631046_s_at |
| 1626727_at   | 1625211_s_at | 1640523_at   | 1625692_s_at | 1623588_at   | 1641587_at   |
| 1625778_at   | 1636247_at   | 1631566_at   | 1631359_s_at | 1634668_at   | 1639123_at   |
| 1638529_at   | 1632403_at   | 1637460_at   | 1637133_x_at | 1625980_at   | 1631377_a_at |
| 1640131_a_at | 1628652_at   | 1634546_at   | 1631487_s_at | 1625491_at   | 1625652_s_at |

|              |              |              |              |              |              |
|--------------|--------------|--------------|--------------|--------------|--------------|
| 1627278_s_at | 1633597_at   | 1625442_a_at | 1635788_a_at | 1624873_at   | 1626481_a_at |
| 1637246_a_at | 1630979_at   | 1627000_s_at | 1633157_a_at | 1635975_s_at | 1632117_s_at |
| 1638457_at   | 1630563_at   | 1623516_s_at | 1637057_at   | 1625370_s_at | 1630456_at   |
| 1624029_at   | 1625584_at   | 1625401_at   | 1625215_s_at | 1628536_s_at | 1624752_at   |
| 1632317_at   | 1636961_a_at | 1626431_at   | 1625825_at   | 1635229_at   | 1626543_at   |
| 1638515_at   | 1640175_at   | 1637018_at   | 1626089_at   | 1634210_at   | 1628840_at   |
| 1629944_at   | 1634818_s_at | 1629034_at   | 1636528_at   | 1630509_at   | 1630052_s_at |
| 1629798_at   | 1625392_at   | 1634170_a_at | 1630874_s_at | 1634250_at   | 1632028_a_at |
| 1635538_at   | 1633427_at   | 1637414_at   | 1634606_a_at | 1640350_at   | 1628927_at   |
| 1633290_a_at | 1623753_at   | 1637737_at   | 1634794_at   | 1629676_at   | 1626694_at   |
| 1625885_at   | 1626609_at   | 1641688_at   | 1637531_at   | 1633432_at   | 1641049_at   |
| 1630802_at   | 1632285_at   | 1639585_a_at | 1640838_s_at | 1629907_at   | 1634329_at   |
| 1630968_at   | 1636598_s_at | 1637739_at   | 1633329_at   | 1636377_at   | 1636057_at   |
| 1630807_at   | 1631765_at   | 1625148_s_at | 1627054_at   | 1638593_a_at | 1635861_a_at |
| 1639364_at   | 1629837_at   | 1631318_at   | 1638639_a_at | 1627963_s_at | 1631119_at   |
| 1637678_at   | 1637669_at   | 1633752_at   | 1629691_at   | 1633718_at   | 1633931_a_at |
| 1627018_s_at | 1636348_s_at | 1626323_s_at | 1634129_at   | 1633336_at   | 1635000_at   |
| 1636548_at   | 1627129_at   | 1632543_at   | 1629597_a_at | 1640445_at   | 1631584_at   |
| 1639203_at   | 1625717_s_at | 1640252_at   | 1639255_s_at | 1624069_at   | 1634989_at   |
| 1628938_at   | 1624662_at   | 1636591_at   | 1626774_s_at | 1630598_at   | 1637359_at   |
| 1641501_a_at | 1630062_a_at | 1637349_at   | 1639788_at   | 1639145_s_at | 1627376_at   |



|              |              |              |              |              |              |
|--------------|--------------|--------------|--------------|--------------|--------------|
| 1632558_at   | 1641575_at   | 1634783_s_at | 1628705_at   | 1629804_s_at | 1628531_at   |
| 1634191_at   | 1632989_a_at | 1624441_at   | 1638722_at   | 1637499_s_at | 1636445_at   |
| 1631237_s_at | 1635591_at   | 1636321_s_at | 1638876_at   | 1635352_s_at | 1637024_at   |
| 1623714_at   | 1630668_a_at | 1626336_at   | 1639454_at   | 1625672_s_at | 1629123_at   |
| 1634458_at   | 1637109_s_at | 1636264_at   | 1639306_s_at | 1639242_a_at | 1631252_a_at |
| 1625537_at   | 1633109_at   | 1630088_at   | 1635226_at   | 1623073_s_at | 1625245_at   |
| 1631695_at   | 1635611_a_at | 1636622_at   | 1640472_at   | 1627971_s_at | 1630002_s_at |
| 1627430_at   | 1629441_at   | 1630418_s_at | 1632455_at   | 1629581_at   | 1638736_at   |
| 1624256_at   | 1641490_s_at | 1622906_at   | 1623446_a_at | 1637816_s_at | 1624517_at   |
| 1629648_s_at | 1639233_at   | 1636902_at   | 1632963_at   | 1625412_at   | 1640465_at   |
| 1629201_at   | 1639338_at   | 1623884_at   | 1635416_at   | 1638721_s_at | 1638703_a_at |
| 1630570_at   | 1625857_at   | 1628668_at   | 1638592_at   | 1633535_at   | 1641635_s_at |
| 1638244_s_at | 1634961_s_at | 1640375_at   | 1638953_a_at | 1631028_s_at | 1629499_at   |
| 1629937_a_at | 1627400_a_at | 1640159_at   | 1624969_s_at | 1638324_s_at | 1633108_at   |
| 1635730_at   | 1635057_s_at | 1627834_a_at | 1626513_at   | 1632409_a_at | 1635104_s_at |
| 1626077_s_at | 1635376_at   | 1625278_s_at | 1626025_at   | 1633673_a_at | 1635677_a_at |
| 1624649_a_at | 1634654_at   | 1630476_s_at | 1623398_at   | 1623669_at   | 1640872_at   |
| 1627719_at   | 1635661_at   | 1637971_a_at | 1632596_at   | 1640928_at   | 1639335_at   |
| 1639508_a_at | 1637481_at   | 1633227_s_at | 1627855_at   | 1639477_s_at | 1633599_a_at |
| 1624407_s_at | 1626509_at   | 1628992_at   | 1623164_a_at | 1631402_s_at | 1632979_at   |
| 1627761_at   | 1625434_at   | 1632345_at   | 1628107_at   | 1641312_at   | 1636521_at   |

|              |              |              |              |              |              |
|--------------|--------------|--------------|--------------|--------------|--------------|
| 1641578_at   | 1630256_at   | 1638052_at   | 1641228_a_at | 1638947_at   | 1630034_at   |
| 1638807_s_at | 1623991_s_at | 1634339_at   | 1630791_a_at | 1641063_s_at | 1631055_at   |
| 1624273_at   | 1629070_at   | 1623678_at   | 1635828_at   | 1634649_at   | 1630946_at   |
| 1635745_a_at | 1626113_at   | 1636383_at   | 1626143_a_at | 1625866_at   | 1623274_s_at |
| 1641599_at   | 1641506_at   | 1627964_s_at | 1637286_a_at | 1632228_at   | 1636960_a_at |
| 1636677_s_at | 1623626_a_at | 1625076_at   | 1623199_a_at | 1637016_at   | 1630433_at   |
| 1624251_a_at | 1637341_at   | 1639660_s_at | 1641495_at   | 1626124_at   | 1623357_at   |
| 1625023_a_at | 1634364_s_at | 1632838_at   | 1629345_at   | 1639347_s_at | 1637301_a_at |
| 1628696_at   | 1627633_at   | 1630147_at   | 1638246_at   | 1636112_s_at | 1628323_s_at |
| 1636068_a_at | 1624321_at   | 1625373_at   | 1625471_s_at | 1633533_at   | 1624207_at   |
| 1634152_at   | 1631535_at   | 1631419_at   | 1624322_at   | 1629745_at   | 1637064_at   |
| 1625433_at   | 1624393_at   | 1628027_a_at | 1636718_s_at | 1632216_at   | 1641320_s_at |
| 1625757_at   | 1625511_at   | 1637957_s_at | 1630941_s_at | 1630752_at   | 1626637_a_at |
| 1626841_s_at | 1637036_s_at | 1624715_at   | 1635500_a_at | 1633582_at   | 1636603_a_at |
| 1636302_s_at | 1640809_at   | 1633965_at   | 1632633_at   | 1627228_at   | 1634599_s_at |
| 1635321_at   | 1626990_s_at | 1641464_s_at | 1633473_s_at | 1623910_at   | 1636772_s_at |
| 1625453_a_at | 1628867_s_at | 1641026_a_at | 1626560_at   | 1631050_at   | 1638109_s_at |
| 1634249_s_at | 1623740_at   | 1628645_at   | 1635007_at   | 1628915_s_at | 1640834_at   |
| 1632734_s_at | 1634877_at   | 1631569_s_at | 1624347_s_at | 1638205_s_at | 1627270_at   |
| 1633002_at   | 1631454_a_at | 1637076_at   | 1634148_at   | 1640409_at   | 1630520_s_at |
| 1624439_at   | 1625324_at   | 1635728_a_at | 1627256_s_at | 1624695_at   | 1636798_at   |

|              |              |              |              |              |              |
|--------------|--------------|--------------|--------------|--------------|--------------|
| 1625007_a_at | 1624849_at   | 1635390_s_at | 1638854_s_at | 1638154_at   | 1641066_s_at |
| 1632916_at   | 1627732_s_at | 1628385_a_at | 1636569_a_at | 1627515_at   | 1636762_a_at |
| 1626534_at   | 1630984_at   | 1632790_at   | 1634270_at   | 1629566_at   | 1627197_at   |
| 1627043_at   | 1623503_at   | 1635998_at   | 1636682_at   | 1639946_at   | 1637428_a_at |
| 1630788_at   | 1635188_at   | 1625897_s_at | 1638818_at   | 1624851_at   | 1633513_a_at |
| 1636669_at   | 1640162_at   | 1630774_s_at | 1639305_a_at | 1639363_at   | 1628469_a_at |
| 1639245_x_at | 1631323_a_at | 1623858_at   | 1633770_at   | 1624012_at   | 1637769_s_at |
| 1624362_at   | 1622995_at   | 1634792_s_at | 1635378_at   | 1640952_at   | 1635705_at   |
| 1633021_s_at | 1624183_a_at | 1638100_s_at | 1636487_at   | 1628489_at   | 1626884_a_at |
| 1628465_a_at | 1640397_at   | 1640204_at   | 1632481_at   | 1629086_s_at | 1633732_at   |
| 1634096_at   | 1625618_at   | 1630286_at   | 1624021_a_at | 1623144_at   | 1628573_a_at |
| 1640710_at   | 1622898_a_at | 1626885_at   | 1640242_s_at | 1635267_s_at | 1632498_at   |
| 1625637_at   | 1633088_at   | 1625131_s_at | 1626743_at   | 1635918_at   | 1629813_at   |
| 1637172_at   | 1635583_s_at | 1632221_at   | 1629981_at   | 1635819_at   | 1633144_at   |
| 1624971_at   | 1641378_at   | 1626261_s_at | 1626666_s_at | 1634053_at   | 1624203_s_at |
| 1635210_a_at | 1639095_at   | 1632943_a_at | 1623227_s_at | 1631320_at   | 1639609_s_at |
| 1631499_a_at | 1626488_s_at | 1626581_s_at | 1629797_at   | 1635507_at   | 1636026_at   |
| 1630857_s_at | 1634991_at   | 1628214_at   | 1637821_at   | 1640624_s_at | 1641118_at   |
| 1635681_at   | 1626812_at   | 1633032_s_at | 1630865_s_at | 1640534_s_at | 1626303_s_at |
| 1625544_s_at | 1624361_s_at | 1627636_at   | 1641328_at   | 1627288_a_at | 1628363_at   |
| 1625901_s_at | 1633553_s_at | 1625264_s_at | 1625880_at   | 1637405_at   | 1627044_s_at |

|              |              |              |              |              |              |
|--------------|--------------|--------------|--------------|--------------|--------------|
| 1628964_at   | 1625830_a_at | 1640256_at   | 1624704_at   | 1640886_a_at | 1625019_at   |
| 1634978_at   | 1628715_a_at | 1627410_at   | 1640896_at   | 1631112_at   | 1635403_at   |
| 1629996_at   | 1625476_a_at | 1636025_at   | 1635914_at   | 1639121_at   | 1635005_a_at |
| 1631205_a_at | 1637463_a_at | 1624837_at   | 1624417_a_at | 1640879_at   | 1633494_at   |
| 1627500_at   | 1628432_at   | 1625762_s_at | 1628269_at   | 1639851_at   | 1625427_at   |
| 1632568_at   | 1637257_at   | 1624122_a_at | 1635963_a_at | 1640883_a_at | 1629573_at   |
| 1624132_at   | 1623666_at   | 1628543_a_at | 1636103_a_at | 1640729_s_at | 1633780_at   |
| 1625445_s_at | 1624185_at   | 1624086_at   | 1626970_at   | 1637975_at   | 1623664_at   |
| 1638619_s_at | 1635531_at   | 1638413_at   | 1630173_a_at | 1638726_at   | 1639597_at   |
| 1640835_a_at | 1633839_at   | 1635634_at   | 1628530_at   | 1637905_s_at | 1623959_at   |
| 1627651_a_at | 1638466_a_at | 1634869_at   | 1639826_at   | 1636759_at   | 1630593_at   |
| 1624190_at   | 1624410_at   | 1629145_at   | 1637430_s_at | 1628314_a_at | 1627802_s_at |
| 1640062_at   | 1639437_s_at | 1638893_at   | 1628950_at   | 1634733_at   | 1635375_at   |
| 1623555_at   | 1629308_at   | 1637385_a_at | 1628475_at   | 1633446_s_at | 1638558_a_at |
| 1635974_at   | 1626349_at   | 1636689_at   | 1635065_at   | 1635466_at   | 1634211_at   |
| 1624448_at   | 1624471_s_at | 1634187_x_at | 1633471_at   | 1637570_at   | 1634656_s_at |
| 1623931_s_at | 1626566_at   | 1638432_a_at | 1629511_at   | 1638338_a_at | 1640300_at   |
| 1625196_a_at | 1625719_at   | 1629843_s_at | 1635619_a_at | 1636196_s_at | 1633698_at   |
| 1641542_at   | 1632888_s_at | 1633935_at   | 1624300_s_at | 1640405_at   | 1636846_at   |
| 1633594_at   | 1627452_a_at | 1626759_at   | 1637149_s_at | 1625780_a_at | 1627930_s_at |
| 1633745_a_at | 1632840_s_at | 1632676_s_at | 1637478_s_at | 1640412_at   | 1634574_a_at |

|              |              |              |              |              |              |
|--------------|--------------|--------------|--------------|--------------|--------------|
| 1631273_at   | 1622937_at   | 1634899_a_at | 1630378_at   | 1632819_at   | 1631394_at   |
| 1628739_at   | 1637537_at   | 1631746_a_at | 1630721_s_at | 1639001_a_at | 1637874_at   |
| 1626086_at   | 1633385_at   | 1624142_a_at | 1625173_s_at | 1631594_s_at | 1640024_at   |
| 1632985_at   | 1627518_at   | 1641701_at   | 1635256_s_at | 1636436_at   | 1626452_at   |
| 1638186_a_at | 1635227_at   | 1623039_at   | 1632273_at   | 1630027_s_at | 1628613_a_at |
| 1631616_at   | 1629287_at   | 1632488_a_at | 1629887_at   | 1635011_at   | 1632945_at   |
| 1628726_s_at | 1638335_at   | 1634325_a_at | 1626940_at   | 1623837_at   | 1629744_a_at |
| 1623514_a_at | 1638809_at   | 1635501_at   | 1641169_s_at | 1636275_a_at | 1633515_s_at |
| 1623418_at   | 1623383_at   | 1639257_s_at | 1625369_at   | 1636311_at   | 1623518_s_at |
| 1628492_at   | 1638011_a_at | 1628763_at   | 1640491_at   | 1623589_a_at | 1640364_at   |
| 1636989_a_at | 1637853_a_at | 1626178_s_at | 1639482_a_at | 1624675_at   | 1631856_a_at |
| 1639507_at   | 1640470_s_at | 1625711_at   | 1633589_a_at | 1637492_at   | 1624044_at   |
| 1640228_at   | 1634102_at   | 1626821_s_at | 1623373_at   | 1623379_at   | 1634573_a_at |
| 1641111_s_at | 1631426_at   | 1635298_at   | 1629819_s_at | 1629890_a_at | 1625358_s_at |
| 1636337_s_at | 1623126_at   | 1635997_a_at | 1636157_at   | 1634315_a_at | 1632700_a_at |
| 1625997_s_at | 1634303_at   | 1635756_at   | 1627491_at   | 1634213_at   | 1626875_at   |
| 1635967_at   | 1639690_a_at | 1630925_at   | 1640372_at   | 1638956_at   | 1633149_at   |
| 1630938_a_at | 1623264_at   | 1636180_at   | 1633206_at   | 1639321_s_at | 1627220_at   |
| 1633983_a_at | 1637352_a_at | 1627629_at   | 1639900_at   | 1637190_at   | 1641191_s_at |
| 1627178_at   | 1638418_at   | 1628339_a_at | 1640918_at   | 1627886_at   | 1628618_at   |
| 1625604_at   | 1630313_a_at | 1623787_at   | 1623952_a_at | 1632841_x_at | 1635423_s_at |

|              |              |              |              |              |              |
|--------------|--------------|--------------|--------------|--------------|--------------|
| 1627402_a_at | 1633319_at   | 1637703_a_at | 1626138_s_at | 1634343_at   | 1636651_a_at |
| 1623261_at   | 1638716_a_at | 1635800_at   | 1632081_s_at | 1632163_at   | 1639676_at   |
| 1629803_a_at | 1639784_at   | 1636853_at   | 1638937_at   | 1625556_at   | 1641236_s_at |
| 1636918_a_at | 1633044_at   | 1639502_at   | 1640917_at   | 1640555_at   | 1633612_at   |
| 1640395_a_at | 1627302_at   | 1629169_at   | 1628743_at   | 1639722_s_at | 1636029_s_at |
| 1639091_at   | 1627647_at   | 1626805_s_at | 1626163_s_at | 1632658_a_at | 1629806_a_at |
| 1631388_at   | 1634633_s_at | 1625552_at   | 1629839_a_at | 1637560_at   | 1635199_at   |
| 1631399_a_at | 1638275_at   | 1641427_at   | 1634522_s_at | 1633135_s_at | 1636706_at   |
| 1632500_at   | 1625955_a_at | 1640417_a_at | 1640142_at   | 1636316_a_at | 1634925_at   |
| 1632339_s_at | 1637393_at   | 1628621_at   | 1632670_at   | 1639320_a_at | 1631750_a_at |
| 1641207_s_at | 1637772_at   | 1627227_at   | 1638866_at   | 1633401_s_at | 1639566_s_at |
| 1638412_at   | 1635976_at   | 1628466_s_at | 1634512_at   | 1625686_s_at | 1635266_at   |
| 1624331_at   | 1641202_at   | 1628032_a_at | 1632395_s_at | 1632094_at   | 1636219_at   |
| 1625847_at   | 1623849_s_at | 1626147_s_at | 1632815_at   | 1638508_at   | 1633280_s_at |
| 1632196_at   | 1637008_at   | 1639380_a_at | 1641226_a_at | 1635259_at   | 1638708_s_at |
| 1629129_at   | 1624720_s_at | 1635711_s_at | 1631704_at   | 1640266_a_at | 1628420_s_at |
| 1628207_at   | 1630101_s_at | 1625949_at   | 1638653_a_at | 1623690_at   | 1632852_s_at |
| 1627024_s_at | 1629858_at   | 1637506_at   | 1629647_at   | 1634971_at   | 1638176_at   |
| 1639733_s_at | 1628328_at   | 1625921_at   | 1624429_at   | 1627840_a_at | 1640048_s_at |
| 1640090_a_at | 1625594_s_at | 1623788_at   | 1630249_at   | 1637148_at   | 1628710_at   |
| 1627984_at   | 1625128_a_at | 1629411_at   | 1625249_at   | 1628146_at   | 1637987_at   |

|              |              |              |              |              |              |
|--------------|--------------|--------------|--------------|--------------|--------------|
| 1626706_at   | 1640907_at   | 1625140_at   | 1623197_a_at | 1636947_at   | 1635340_at   |
| 1637710_at   | 1635541_s_at | 1640797_at   | 1640496_at   | 1626038_at   | 1628873_s_at |
| 1631327_at   | 1633956_s_at | 1639571_s_at | 1634246_at   | 1635173_at   | 1627726_a_at |
| 1636145_at   | 1640932_s_at | 1641518_a_at | 1623276_at   | 1638673_at   | 1638521_a_at |
| 1636281_at   | 1626394_at   | 1630688_at   | 1633405_s_at | 1637684_at   | 1628149_a_at |
| 1630816_at   | 1626246_s_at | 1638727_at   | 1635652_at   | 1626449_s_at | 1632457_s_at |
| 1631456_at   | 1639763_at   | 1634675_s_at | 1633801_s_at | 1624541_at   | 1630531_at   |
| 1638903_at   | 1640092_a_at | 1626729_at   | 1624003_at   | 1626461_at   | 1623743_at   |
| 1626001_at   | 1639770_at   | 1637165_at   | 1627598_at   | 1628194_at   | 1623486_at   |
| 1640750_at   | 1625163_at   | 1632530_s_at | 1641609_at   | 1624042_at   | 1631274_at   |
| 1639396_s_at | 1629141_at   | 1633143_s_at | 1629852_at   | 1640337_a_at | 1635138_at   |
| 1637155_at   | 1639494_at   | 1636431_at   | 1622970_at   | 1626221_at   | 1623254_s_at |
| 1628488_at   | 1623843_at   | 1634065_s_at | 1638143_a_at | 1630450_s_at | 1630611_at   |
| 1628208_at   | 1635372_a_at | 1628306_at   | 1626456_at   | 1635638_s_at | 1628360_at   |
| 1625950_a_at | 1624943_at   | 1638345_at   | 1629372_a_at | 1632377_at   | 1630415_at   |
| 1638460_s_at | 1626554_at   | 1628358_at   | 1636183_at   | 1638872_at   | 1637294_at   |
| 1628675_at   | 1623881_s_at | 1630345_at   | 1634452_s_at | 1625827_s_at | 1634667_at   |
| 1634454_at   | 1641504_s_at | 1635260_at   | 1636926_s_at | 1634373_a_at | 1624240_at   |
| 1630186_at   | 1640083_at   | 1637411_s_at | 1628251_at   | 1634525_at   | 1635023_at   |
| 1636954_at   | 1631445_at   | 1636208_a_at | 1624755_a_at | 1628758_at   | 1626390_at   |
| 1636956_at   | 1627478_at   | 1630901_a_at | 1625750_at   | 1635961_at   | 1641297_at   |

|              |              |              |              |              |              |
|--------------|--------------|--------------|--------------|--------------|--------------|
| 1628458_at   | 1628777_at   | 1635202_s_at | 1623762_at   | 1631291_at   | 1641004_a_at |
| 1624976_at   | 1624447_s_at | 1629970_s_at | 1633795_a_at | 1638663_at   | 1633412_s_at |
| 1637652_a_at | 1637575_at   | 1640833_at   | 1635127_at   | 1637557_a_at | 1629748_s_at |
| 1623863_a_at | 1627006_at   | 1637778_a_at | 1633009_a_at | 1632526_s_at | 1630280_s_at |
| 1626624_s_at | 1639431_at   | 1641618_at   | 1632225_a_at | 1628990_at   | 1640813_at   |
| 1633370_s_at | 1633948_a_at | 1627507_at   | 1625075_at   | 1639985_s_at | 1627509_s_at |
| 1640241_at   | 1632667_s_at | 1626056_a_at | 1631243_s_at | 1626208_at   | 1624165_a_at |
| 1632440_at   | 1634704_at   | 1628014_at   | 1633775_at   | 1636493_at   | 1641104_s_at |
| 1636608_at   | 1628143_a_at | 1639635_s_at | 1625838_at   | 1625034_s_at | 1638963_s_at |
| 1633483_a_at | 1624533_s_at | 1636728_at   | 1634351_at   | 1630502_at   | 1633476_at   |
| 1628284_at   | 1633681_at   | 1622932_s_at | 1629961_s_at | 1627645_at   | 1630886_at   |
| 1634890_at   | 1640007_at   | 1629030_a_at | 1626174_a_at | 1633422_a_at | 1634562_s_at |
| 1628671_a_at | 1624109_s_at | 1627588_at   | 1633852_at   | 1640736_at   | 1641303_at   |
| 1631340_at   | 1627420_s_at | 1632160_s_at | 1638051_at   | 1626528_at   | 1638063_at   |
| 1634043_at   | 1626033_at   | 1640672_at   | 1622973_at   | 1625065_s_at | 1631183_at   |
| 1633729_a_at | 1623043_s_at | 1641544_at   | 1640767_s_at | 1630506_at   | 1633081_at   |
| 1639171_at   | 1630055_a_at | 1628498_at   | 1633973_at   | 1639584_at   | 1638875_at   |
| 1625843_s_at | 1640386_at   | 1623648_s_at | 1624727_s_at | 1626184_at   | 1636496_at   |
| 1638447_s_at | 1635393_s_at | 1626980_at   | 1637770_a_at | 1624608_s_at | 1640060_at   |
| 1632961_at   | 1628861_at   | 1630113_at   | 1631435_at   | 1639825_at   | 1629877_at   |
| 1633112_at   | 1638416_at   | 1632211_at   | 1625981_at   | 1632618_a_at | 1624970_s_at |



|              |              |              |              |              |              |
|--------------|--------------|--------------|--------------|--------------|--------------|
| 1636673_s_at | 1628888_at   | 1640659_s_at | 1627114_at   | 1636301_s_at | 1634674_at   |
| 1636423_at   | 1636530_s_at | 1625515_a_at | 1635363_a_at | 1632297_at   | 1625110_at   |
| 1626320_at   | 1631145_at   | 1630306_at   | 1624119_at   | 1632678_at   | 1629990_at   |
| 1624237_at   | 1627592_at   | 1623761_at   | 1636946_at   | 1630650_at   | 1640416_at   |
| 1634913_s_at | 1625362_at   | 1629266_s_at | 1623048_a_at | 1632129_a_at | 1631473_at   |
| 1639897_at   | 1632287_at   | 1640567_at   | 1633846_at   | 1628493_at   | 1640130_at   |
| 1628691_at   | 1629658_at   | 1636332_at   | 1626237_at   | 1640968_a_at | 1629168_s_at |
| 1629898_s_at | 1634184_a_at | 1634944_at   | 1639766_at   | 1637826_at   | 1628482_at   |
| 1625985_at   | 1632120_at   | 1641231_at   | 1634084_at   | 1635444_at   | 1628155_at   |
| 1630224_at   | 1626751_at   | 1635109_at   | 1640332_at   | 1626099_s_at | 1639117_a_at |
| 1629150_at   | 1628629_at   | 1641074_s_at | 1633242_a_at | 1628931_at   | 1640288_s_at |
| 1623545_at   | 1636543_a_at | 1626239_at   | 1624481_a_at | 1639911_at   | 1635211_at   |
| 1639055_at   | 1626331_at   | 1623012_at   | 1625281_at   | 1641676_at   | 1634613_s_at |
| 1633115_a_at | 1633499_at   | 1638409_at   | 1627568_at   | 1627282_at   | 1628285_a_at |
| 1625691_at   | 1635103_at   | 1633386_s_at | 1635910_at   | 1624437_s_at | 1636344_at   |
| 1641496_a_at | 1634020_at   | 1628823_at   | 1626523_a_at | 1630764_at   | 1630320_at   |
| 1627668_s_at | 1641486_at   | 1639184_at   | 1624731_s_at | 1631718_at   | 1634699_a_at |
| 1639452_at   | 1634222_at   | 1634314_s_at | 1639984_at   | 1626874_at   | 1635224_s_at |
| 1640912_s_at | 1630824_a_at | 1623755_at   | 1638541_at   | 1636953_a_at | 1631798_s_at |
| 1632744_a_at | 1635491_s_at | 1639394_at   | 1639140_at   | 1624051_at   | 1637830_s_at |
| 1624212_at   | 1626090_at   | 1641206_at   | 1629248_at   | 1634218_at   | 1627872_at   |

|              |              |              |              |              |              |
|--------------|--------------|--------------|--------------|--------------|--------------|
| 1627764_at   | 1641368_at   | 1624569_at   | 1635818_at   | 1630983_s_at | 1638033_at   |
| 1624577_at   | 1635808_s_at | 1627354_at   | 1623216_s_at | 1638994_at   | 1628390_at   |
| 1628688_at   | 1637442_at   | 1630504_at   | 1637417_at   | 1625122_at   | 1628296_at   |
| 1632704_at   | 1636681_at   | 1623374_a_at | 1640112_at   | 1639434_at   | 1631121_at   |
| 1632278_s_at | 1636647_s_at | 1640284_at   | 1637706_at   | 1636244_s_at | 1634972_at   |
| 1627497_at   | 1633834_at   | 1634549_at   | 1635893_at   | 1639326_s_at | 1638377_x_at |
| 1638931_at   | 1630334_at   | 1626271_at   | 1632073_at   | 1628650_at   | 1641047_at   |
| 1639133_at   | 1632352_a_at | 1637771_s_at | 1627574_at   | 1634403_at   | 1635238_s_at |
| 1635589_at   | 1638612_at   | 1628008_a_at | 1637633_at   | 1627970_at   | 1636474_at   |
| 1630935_at   | 1628563_at   | 1624324_a_at | 1629442_at   | 1625102_at   | 1639743_s_at |
| 1640889_at   | 1634495_s_at | 1624726_s_at | 1633145_at   | 1635757_at   | 1627915_a_at |
| 1624908_at   | 1629020_s_at | 1636872_at   | 1622893_at   | 1632418_s_at | 1640363_a_at |
| 1623647_at   | 1634192_at   | 1632975_at   | 1628598_s_at | 1633714_at   | 1627456_s_at |
| 1632485_a_at | 1640970_at   | 1639671_at   | 1633759_s_at | 1636395_at   | 1637612_at   |
| 1637407_at   | 1639215_at   | 1629767_s_at | 1629357_s_at | 1629899_at   | 1640557_at   |
| 1626590_a_at | 1635943_s_at | 1628862_at   | 1624521_a_at | 1628453_at   | 1637913_at   |
| 1622946_at   | 1636791_s_at | 1626856_at   | 1629754_s_at | 1629080_at   | 1641330_at   |
| 1631118_s_at | 1633870_at   | 1637815_s_at | 1629732_at   | 1625727_at   | 1638783_at   |
| 1634878_at   | 1639047_at   | 1635041_at   | 1635329_at   | 1628377_s_at | 1631779_s_at |
| 1625638_a_at | 1623424_a_at | 1628150_a_at | 1630094_at   | 1634291_at   | 1625087_a_at |
| 1637342_s_at | 1632178_at   | 1624326_at   | 1640457_s_at | 1636703_at   | 1631579_a_at |

1634952\_s\_at

1640271\_s\_at

1641698\_at

1636639\_at

1641152\_at

1628952\_s\_at

\*\*\*\*\*

Lin Effects FDR < 0.1

|              |              |              |              |              |              |
|--------------|--------------|--------------|--------------|--------------|--------------|
| 1622894_at   | 1623154_a_at | 1623502_at   | 1623698_s_at | 1624027_at   | 1624272_at   |
| 1622909_at   | 1623201_at   | 1623505_s_at | 1623737_a_at | 1624042_at   | 1624273_at   |
| 1622915_at   | 1623203_at   | 1623510_at   | 1623766_at   | 1624054_at   | 1624277_at   |
| 1622921_at   | 1623251_at   | 1623513_at   | 1623770_at   | 1624069_at   | 1624300_s_at |
| 1622970_at   | 1623256_at   | 1623518_s_at | 1623782_at   | 1624083_s_at | 1624332_s_at |
| 1622973_at   | 1623264_at   | 1623540_at   | 1623785_a_at | 1624099_at   | 1624347_s_at |
| 1623027_s_at | 1623267_at   | 1623543_at   | 1623789_at   | 1624101_at   | 1624363_at   |
| 1623028_at   | 1623268_a_at | 1623552_s_at | 1623817_at   | 1624117_at   | 1624389_at   |
| 1623036_a_at | 1623281_s_at | 1623591_a_at | 1623819_at   | 1624135_at   | 1624395_at   |
| 1623040_at   | 1623285_at   | 1623631_at   | 1623826_at   | 1624149_at   | 1624444_at   |
| 1623058_at   | 1623306_at   | 1623633_at   | 1623849_s_at | 1624156_at   | 1624457_at   |
| 1623080_at   | 1623333_a_at | 1623645_a_at | 1623863_a_at | 1624165_a_at | 1624464_s_at |
| 1623088_at   | 1623335_a_at | 1623662_at   | 1623864_at   | 1624173_at   | 1624480_at   |
| 1623094_at   | 1623353_at   | 1623666_at   | 1623885_at   | 1624186_at   | 1624481_a_at |
| 1623097_at   | 1623357_at   | 1623669_at   | 1623900_a_at | 1624195_at   | 1624484_a_at |
| 1623113_at   | 1623436_a_at | 1623675_at   | 1623916_at   | 1624198_at   | 1624497_at   |
| 1623133_a_at | 1623455_s_at | 1623687_at   | 1623934_at   | 1624215_s_at | 1624503_at   |
| 1623134_at   | 1623486_at   | 1623689_a_at | 1623998_at   | 1624252_s_at | 1624510_at   |
| 1623150_at   | 1623498_at   | 1623695_a_at | 1624015_at   | 1624263_at   | 1624521_a_at |

|              |              |              |              |              |              |
|--------------|--------------|--------------|--------------|--------------|--------------|
| 1624533_s_at | 1624755_a_at | 1625008_at   | 1625212_at   | 1625405_at   | 1625648_at   |
| 1624535_at   | 1624756_at   | 1625048_at   | 1625235_at   | 1625422_at   | 1625657_at   |
| 1624539_at   | 1624757_at   | 1625050_s_at | 1625243_a_at | 1625434_at   | 1625658_at   |
| 1624555_at   | 1624772_at   | 1625065_s_at | 1625250_at   | 1625439_at   | 1625665_at   |
| 1624569_at   | 1624775_at   | 1625099_at   | 1625280_at   | 1625462_s_at | 1625685_at   |
| 1624577_at   | 1624782_a_at | 1625102_at   | 1625284_at   | 1625487_at   | 1625697_at   |
| 1624580_at   | 1624795_at   | 1625114_at   | 1625295_at   | 1625499_at   | 1625700_a_at |
| 1624581_at   | 1624815_at   | 1625120_at   | 1625304_s_at | 1625512_s_at | 1625727_at   |
| 1624583_at   | 1624847_at   | 1625129_at   | 1625314_at   | 1625514_s_at | 1625742_at   |
| 1624589_a_at | 1624863_a_at | 1625134_at   | 1625323_at   | 1625517_at   | 1625744_at   |
| 1624603_at   | 1624864_s_at | 1625137_at   | 1625325_s_at | 1625537_at   | 1625755_at   |
| 1624618_at   | 1624869_at   | 1625144_at   | 1625330_at   | 1625544_s_at | 1625770_at   |
| 1624627_s_at | 1624892_s_at | 1625162_at   | 1625338_at   | 1625572_s_at | 1625793_at   |
| 1624629_at   | 1624908_at   | 1625163_at   | 1625348_s_at | 1625589_at   | 1625801_s_at |
| 1624665_at   | 1624929_at   | 1625164_at   | 1625358_s_at | 1625595_a_at | 1625806_at   |
| 1624668_s_at | 1624935_at   | 1625165_at   | 1625359_at   | 1625613_at   | 1625826_at   |
| 1624678_at   | 1624953_at   | 1625166_at   | 1625362_at   | 1625617_at   | 1625829_a_at |
| 1624683_at   | 1624957_a_at | 1625184_at   | 1625374_at   | 1625631_at   | 1625850_at   |
| 1624688_at   | 1624966_at   | 1625185_at   | 1625375_at   | 1625640_a_at | 1625857_at   |
| 1624692_at   | 1624971_at   | 1625193_at   | 1625388_at   | 1625644_at   | 1625860_s_at |
| 1624717_s_at | 1624993_at   | 1625211_s_at | 1625393_s_at | 1625646_at   | 1625862_x_at |

|              |              |              |              |              |              |
|--------------|--------------|--------------|--------------|--------------|--------------|
| 1625863_at   | 1626138_s_at | 1626344_at   | 1626584_a_at | 1626850_s_at | 1627120_at   |
| 1625887_at   | 1626147_s_at | 1626350_at   | 1626588_a_at | 1626856_at   | 1627144_at   |
| 1625898_s_at | 1626148_at   | 1626352_at   | 1626596_at   | 1626857_at   | 1627167_a_at |
| 1625913_at   | 1626154_at   | 1626385_s_at | 1626609_at   | 1626864_at   | 1627172_s_at |
| 1625922_a_at | 1626156_at   | 1626396_s_at | 1626641_s_at | 1626881_at   | 1627189_a_at |
| 1625954_at   | 1626168_at   | 1626399_at   | 1626650_at   | 1626906_at   | 1627246_at   |
| 1625967_s_at | 1626175_at   | 1626407_at   | 1626679_at   | 1626933_s_at | 1627287_at   |
| 1625972_at   | 1626198_at   | 1626412_at   | 1626699_at   | 1626947_s_at | 1627288_a_at |
| 1625985_at   | 1626201_at   | 1626414_at   | 1626701_at   | 1626963_at   | 1627297_at   |
| 1625986_at   | 1626217_at   | 1626433_at   | 1626707_a_at | 1626972_at   | 1627301_s_at |
| 1625990_at   | 1626251_at   | 1626435_at   | 1626718_at   | 1627009_at   | 1627327_at   |
| 1625994_a_at | 1626257_at   | 1626482_a_at | 1626734_at   | 1627014_a_at | 1627330_at   |
| 1626007_at   | 1626261_s_at | 1626492_s_at | 1626740_at   | 1627041_s_at | 1627340_at   |
| 1626039_at   | 1626289_at   | 1626497_at   | 1626745_at   | 1627047_at   | 1627343_a_at |
| 1626056_a_at | 1626307_at   | 1626503_at   | 1626749_a_at | 1627068_at   | 1627376_at   |
| 1626074_at   | 1626315_at   | 1626524_at   | 1626781_at   | 1627078_at   | 1627405_at   |
| 1626079_a_at | 1626320_at   | 1626536_at   | 1626812_at   | 1627093_at   | 1627432_at   |
| 1626086_at   | 1626324_at   | 1626540_at   | 1626813_at   | 1627100_s_at | 1627436_s_at |
| 1626094_at   | 1626326_at   | 1626552_at   | 1626820_at   | 1627102_at   | 1627448_at   |
| 1626112_at   | 1626334_at   | 1626565_at   | 1626832_at   | 1627114_at   | 1627459_at   |
| 1626124_at   | 1626340_at   | 1626577_at   | 1626841_s_at | 1627118_at   | 1627460_at   |

|              |              |              |              |              |              |
|--------------|--------------|--------------|--------------|--------------|--------------|
| 1627470_at   | 1627779_at   | 1628030_at   | 1628309_at   | 1628494_a_at | 1628686_a_at |
| 1627473_at   | 1627807_at   | 1628040_at   | 1628320_at   | 1628500_at   | 1628716_at   |
| 1627495_at   | 1627829_at   | 1628053_at   | 1628328_at   | 1628507_at   | 1628719_at   |
| 1627498_at   | 1627832_at   | 1628080_at   | 1628332_at   | 1628539_at   | 1628726_s_at |
| 1627507_at   | 1627840_a_at | 1628083_at   | 1628339_a_at | 1628550_a_at | 1628734_at   |
| 1627552_at   | 1627844_at   | 1628092_at   | 1628360_at   | 1628558_at   | 1628743_at   |
| 1627565_at   | 1627847_s_at | 1628100_at   | 1628362_s_at | 1628578_at   | 1628744_s_at |
| 1627574_at   | 1627861_s_at | 1628129_a_at | 1628363_at   | 1628581_at   | 1628754_s_at |
| 1627598_at   | 1627881_at   | 1628131_at   | 1628364_at   | 1628599_at   | 1628759_a_at |
| 1627620_at   | 1627890_at   | 1628149_a_at | 1628404_at   | 1628605_at   | 1628760_at   |
| 1627633_at   | 1627895_at   | 1628152_at   | 1628420_s_at | 1628608_at   | 1628763_at   |
| 1627640_at   | 1627910_s_at | 1628173_at   | 1628428_at   | 1628611_at   | 1628764_at   |
| 1627656_at   | 1627938_at   | 1628202_at   | 1628432_at   | 1628617_at   | 1628798_at   |
| 1627657_at   | 1627939_a_at | 1628214_at   | 1628444_at   | 1628618_at   | 1628818_at   |
| 1627660_a_at | 1627959_a_at | 1628231_at   | 1628446_at   | 1628632_at   | 1628821_at   |
| 1627662_at   | 1627964_s_at | 1628237_s_at | 1628469_a_at | 1628643_at   | 1628828_s_at |
| 1627679_at   | 1627971_s_at | 1628257_s_at | 1628475_at   | 1628646_at   | 1628854_at   |
| 1627682_at   | 1627973_s_at | 1628264_a_at | 1628487_s_at | 1628648_at   | 1628862_at   |
| 1627702_at   | 1627982_at   | 1628268_at   | 1628488_at   | 1628670_at   | 1628882_at   |
| 1627761_at   | 1628000_s_at | 1628272_a_at | 1628492_at   | 1628675_at   | 1628909_at   |
| 1627773_a_at | 1628018_at   | 1628282_at   | 1628493_at   | 1628681_at   | 1628922_s_at |

|              |              |              |              |              |              |
|--------------|--------------|--------------|--------------|--------------|--------------|
| 1628931_at   | 1629233_s_at | 1629468_at   | 1629718_at   | 1630212_at   | 1630429_s_at |
| 1628946_at   | 1629243_at   | 1629469_s_at | 1629766_at   | 1630227_a_at | 1630453_at   |
| 1628947_s_at | 1629250_at   | 1629476_at   | 1629788_at   | 1630236_s_at | 1630467_a_at |
| 1628977_at   | 1629257_s_at | 1629479_a_at | 1629806_a_at | 1630241_at   | 1630469_a_at |
| 1628984_s_at | 1629271_at   | 1629487_at   | 1629853_at   | 1630242_at   | 1630483_a_at |
| 1629009_at   | 1629285_at   | 1629496_at   | 1629875_a_at | 1630256_at   | 1630504_at   |
| 1629072_at   | 1629307_s_at | 1629510_at   | 1629897_a_at | 1630260_at   | 1630520_s_at |
| 1629078_s_at | 1629308_at   | 1629515_at   | 1629936_at   | 1630263_at   | 1630539_at   |
| 1629083_at   | 1629327_at   | 1629520_at   | 1629972_at   | 1630302_at   | 1630590_at   |
| 1629095_a_at | 1629363_at   | 1629565_s_at | 1630003_at   | 1630306_at   | 1630605_at   |
| 1629098_at   | 1629367_at   | 1629625_at   | 1630005_at   | 1630323_at   | 1630606_at   |
| 1629106_at   | 1629374_at   | 1629629_at   | 1630008_at   | 1630329_at   | 1630635_s_at |
| 1629113_a_at | 1629377_at   | 1629632_at   | 1630024_at   | 1630335_s_at | 1630641_at   |
| 1629144_at   | 1629382_at   | 1629633_at   | 1630067_a_at | 1630359_at   | 1630643_at   |
| 1629153_s_at | 1629395_at   | 1629642_a_at | 1630113_at   | 1630363_at   | 1630680_at   |
| 1629160_s_at | 1629396_a_at | 1629644_s_at | 1630130_at   | 1630365_at   | 1630685_at   |
| 1629168_s_at | 1629401_s_at | 1629661_at   | 1630153_a_at | 1630393_a_at | 1630699_at   |
| 1629189_at   | 1629413_at   | 1629670_at   | 1630173_a_at | 1630407_at   | 1630713_at   |
| 1629199_at   | 1629427_at   | 1629685_at   | 1630206_at   | 1630416_at   | 1630723_a_at |
| 1629207_at   | 1629442_at   | 1629698_at   | 1630208_at   | 1630421_at   | 1630724_at   |
| 1629227_at   | 1629464_a_at | 1629705_at   | 1630209_at   | 1630422_at   | 1630735_at   |



|              |              |              |              |              |              |
|--------------|--------------|--------------|--------------|--------------|--------------|
| 1630761_at   | 1631030_at   | 1631304_a_at | 1631525_at   | 1631873_at   | 1632196_at   |
| 1630763_at   | 1631040_at   | 1631307_at   | 1631526_s_at | 1631891_at   | 1632198_at   |
| 1630771_s_at | 1631046_s_at | 1631313_at   | 1631561_s_at | 1631915_at   | 1632202_at   |
| 1630773_a_at | 1631055_at   | 1631316_a_at | 1631565_a_at | 1631942_at   | 1632207_a_at |
| 1630778_at   | 1631058_s_at | 1631319_at   | 1631568_a_at | 1631971_at   | 1632212_at   |
| 1630780_a_at | 1631059_at   | 1631325_at   | 1631573_a_at | 1631984_at   | 1632228_at   |
| 1630781_at   | 1631083_at   | 1631354_x_at | 1631578_s_at | 1632003_a_at | 1632232_at   |
| 1630802_at   | 1631090_a_at | 1631359_s_at | 1631584_at   | 1632021_at   | 1632236_at   |
| 1630807_at   | 1631094_s_at | 1631371_s_at | 1631603_at   | 1632041_s_at | 1632258_s_at |
| 1630821_at   | 1631128_s_at | 1631374_at   | 1631622_at   | 1632055_at   | 1632261_at   |
| 1630825_at   | 1631137_at   | 1631399_a_at | 1631633_a_at | 1632057_at   | 1632280_at   |
| 1630841_at   | 1631142_a_at | 1631405_at   | 1631663_at   | 1632065_at   | 1632297_at   |
| 1630842_s_at | 1631161_at   | 1631417_s_at | 1631723_at   | 1632103_at   | 1632317_at   |
| 1630870_s_at | 1631204_at   | 1631420_at   | 1631728_s_at | 1632114_at   | 1632319_at   |
| 1630877_a_at | 1631208_at   | 1631426_at   | 1631733_at   | 1632120_at   | 1632335_at   |
| 1630953_at   | 1631209_at   | 1631430_at   | 1631745_at   | 1632139_at   | 1632338_a_at |
| 1630958_at   | 1631213_at   | 1631456_at   | 1631776_at   | 1632146_a_at | 1632342_a_at |
| 1630983_s_at | 1631214_at   | 1631469_at   | 1631779_s_at | 1632185_s_at | 1632343_at   |
| 1630990_at   | 1631227_at   | 1631477_a_at | 1631784_at   | 1632188_at   | 1632361_at   |
| 1630996_s_at | 1631244_a_at | 1631479_at   | 1631800_at   | 1632194_at   | 1632367_at   |
| 1631024_s_at | 1631303_s_at | 1631515_at   | 1631806_at   | 1632195_at   | 1632373_s_at |

|              |              |              |              |              |              |
|--------------|--------------|--------------|--------------|--------------|--------------|
| 1632387_at   | 1632658_a_at | 1632836_at   | 1633154_at   | 1633471_at   | 1633649_s_at |
| 1632390_at   | 1632695_at   | 1632855_at   | 1633191_at   | 1633480_at   | 1633654_s_at |
| 1632400_at   | 1632705_at   | 1632872_at   | 1633225_at   | 1633487_at   | 1633658_a_at |
| 1632409_a_at | 1632710_s_at | 1632874_at   | 1633233_a_at | 1633497_s_at | 1633687_at   |
| 1632417_a_at | 1632712_s_at | 1632883_at   | 1633237_at   | 1633501_s_at | 1633707_at   |
| 1632420_at   | 1632724_at   | 1632927_at   | 1633266_at   | 1633505_at   | 1633709_at   |
| 1632421_at   | 1632731_at   | 1632932_a_at | 1633268_s_at | 1633512_at   | 1633727_s_at |
| 1632431_s_at | 1632732_at   | 1632936_at   | 1633287_at   | 1633523_at   | 1633731_at   |
| 1632446_at   | 1632751_at   | 1632986_a_at | 1633293_at   | 1633532_at   | 1633755_at   |
| 1632462_at   | 1632753_a_at | 1632989_a_at | 1633305_at   | 1633540_at   | 1633765_at   |
| 1632478_a_at | 1632755_at   | 1633002_at   | 1633320_at   | 1633556_s_at | 1633778_at   |
| 1632479_at   | 1632758_at   | 1633026_a_at | 1633333_a_at | 1633563_at   | 1633779_s_at |
| 1632492_at   | 1632762_s_at | 1633036_s_at | 1633353_s_at | 1633568_s_at | 1633780_at   |
| 1632510_at   | 1632771_at   | 1633060_at   | 1633362_at   | 1633573_a_at | 1633784_at   |
| 1632517_at   | 1632782_a_at | 1633067_at   | 1633378_at   | 1633599_a_at | 1633846_at   |
| 1632532_s_at | 1632794_a_at | 1633086_s_at | 1633380_at   | 1633606_s_at | 1633856_at   |
| 1632568_at   | 1632802_at   | 1633099_at   | 1633415_at   | 1633612_at   | 1633857_at   |
| 1632586_at   | 1632809_at   | 1633106_at   | 1633422_a_at | 1633631_at   | 1633886_at   |
| 1632605_at   | 1632818_at   | 1633111_at   | 1633448_at   | 1633641_a_at | 1633914_at   |
| 1632640_at   | 1632821_a_at | 1633112_at   | 1633457_at   | 1633642_at   | 1633915_at   |
| 1632656_at   | 1632835_at   | 1633131_s_at | 1633467_a_at | 1633645_at   | 1633947_at   |

|              |              |              |              |              |              |
|--------------|--------------|--------------|--------------|--------------|--------------|
| 1633949_at   | 1634182_at   | 1634474_s_at | 1634658_a_at | 1634940_at   | 1635221_at   |
| 1633957_s_at | 1634193_at   | 1634490_at   | 1634664_at   | 1634960_at   | 1635223_at   |
| 1633959_s_at | 1634197_at   | 1634495_s_at | 1634667_at   | 1634962_s_at | 1635233_at   |
| 1633967_at   | 1634209_at   | 1634496_at   | 1634684_at   | 1634971_at   | 1635248_at   |
| 1633975_s_at | 1634219_a_at | 1634509_s_at | 1634687_at   | 1634978_at   | 1635267_s_at |
| 1633997_s_at | 1634240_at   | 1634512_at   | 1634693_at   | 1634979_at   | 1635271_at   |
| 1633998_s_at | 1634241_at   | 1634514_at   | 1634704_at   | 1635003_at   | 1635290_at   |
| 1634013_at   | 1634269_at   | 1634515_at   | 1634705_at   | 1635007_at   | 1635293_s_at |
| 1634014_at   | 1634295_at   | 1634528_at   | 1634713_at   | 1635008_at   | 1635294_at   |
| 1634020_at   | 1634315_a_at | 1634541_a_at | 1634742_at   | 1635013_s_at | 1635305_s_at |
| 1634029_at   | 1634321_s_at | 1634550_at   | 1634750_at   | 1635033_at   | 1635321_at   |
| 1634053_at   | 1634351_at   | 1634551_at   | 1634786_at   | 1635080_at   | 1635329_at   |
| 1634072_s_at | 1634373_a_at | 1634553_at   | 1634804_at   | 1635086_at   | 1635343_a_at |
| 1634076_at   | 1634393_s_at | 1634563_at   | 1634809_s_at | 1635088_at   | 1635361_at   |
| 1634102_at   | 1634396_at   | 1634573_a_at | 1634815_at   | 1635089_at   | 1635363_a_at |
| 1634113_at   | 1634401_at   | 1634592_at   | 1634823_at   | 1635109_at   | 1635365_at   |
| 1634117_at   | 1634429_at   | 1634594_at   | 1634861_at   | 1635137_a_at | 1635370_at   |
| 1634131_s_at | 1634430_at   | 1634625_at   | 1634878_at   | 1635153_at   | 1635379_at   |
| 1634143_at   | 1634433_at   | 1634630_at   | 1634883_at   | 1635203_at   | 1635385_at   |
| 1634144_at   | 1634443_a_at | 1634633_s_at | 1634904_s_at | 1635205_at   | 1635422_s_at |
| 1634165_at   | 1634460_at   | 1634650_at   | 1634922_s_at | 1635211_at   | 1635426_at   |

|              |              |              |              |              |              |
|--------------|--------------|--------------|--------------|--------------|--------------|
| 1635428_at   | 1635647_at   | 1635881_at   | 1636154_at   | 1636322_at   | 1636564_at   |
| 1635435_at   | 1635654_at   | 1635886_s_at | 1636168_s_at | 1636337_s_at | 1636567_at   |
| 1635444_at   | 1635666_at   | 1635893_at   | 1636170_at   | 1636341_at   | 1636575_s_at |
| 1635447_at   | 1635667_at   | 1635897_at   | 1636173_s_at | 1636343_at   | 1636583_at   |
| 1635454_a_at | 1635695_at   | 1635903_at   | 1636174_at   | 1636373_at   | 1636594_at   |
| 1635481_a_at | 1635701_at   | 1635936_at   | 1636193_at   | 1636375_at   | 1636606_at   |
| 1635492_at   | 1635706_at   | 1635939_a_at | 1636198_at   | 1636410_at   | 1636620_s_at |
| 1635500_a_at | 1635724_at   | 1635947_at   | 1636202_s_at | 1636412_at   | 1636647_s_at |
| 1635502_at   | 1635728_a_at | 1635950_at   | 1636205_at   | 1636423_at   | 1636656_at   |
| 1635513_at   | 1635729_a_at | 1635951_at   | 1636207_at   | 1636442_at   | 1636674_at   |
| 1635521_at   | 1635769_at   | 1635970_at   | 1636217_at   | 1636445_at   | 1636694_at   |
| 1635525_at   | 1635774_at   | 1635973_at   | 1636219_at   | 1636446_at   | 1636695_at   |
| 1635527_at   | 1635800_at   | 1635980_s_at | 1636240_at   | 1636460_at   | 1636703_at   |
| 1635530_at   | 1635808_s_at | 1636006_at   | 1636244_s_at | 1636464_at   | 1636705_at   |
| 1635549_at   | 1635813_at   | 1636020_s_at | 1636245_at   | 1636473_at   | 1636743_s_at |
| 1635552_s_at | 1635828_at   | 1636038_at   | 1636248_at   | 1636474_at   | 1636766_at   |
| 1635581_at   | 1635840_s_at | 1636059_at   | 1636255_s_at | 1636493_at   | 1636767_at   |
| 1635588_at   | 1635849_at   | 1636064_at   | 1636257_at   | 1636498_at   | 1636769_at   |
| 1635589_at   | 1635861_a_at | 1636123_at   | 1636275_a_at | 1636539_at   | 1636775_at   |
| 1635607_at   | 1635868_at   | 1636140_at   | 1636308_at   | 1636556_at   | 1636777_at   |
| 1635645_at   | 1635878_s_at | 1636149_at   | 1636311_at   | 1636557_a_at | 1636781_at   |

|              |              |              |              |              |              |
|--------------|--------------|--------------|--------------|--------------|--------------|
| 1636795_at   | 1637107_at   | 1637321_at   | 1637575_at   | 1637843_at   | 1638119_at   |
| 1636798_at   | 1637111_a_at | 1637346_at   | 1637587_at   | 1637872_at   | 1638127_s_at |
| 1636811_at   | 1637118_at   | 1637352_a_at | 1637598_at   | 1637873_at   | 1638143_a_at |
| 1636816_s_at | 1637127_at   | 1637366_at   | 1637612_at   | 1637897_at   | 1638158_at   |
| 1636829_at   | 1637128_a_at | 1637378_s_at | 1637620_s_at | 1637899_at   | 1638174_at   |
| 1636843_a_at | 1637129_at   | 1637386_at   | 1637627_at   | 1637900_at   | 1638176_at   |
| 1636845_at   | 1637141_at   | 1637393_at   | 1637632_at   | 1637942_at   | 1638185_at   |
| 1636848_at   | 1637175_at   | 1637398_a_at | 1637647_at   | 1637954_at   | 1638225_a_at |
| 1636877_at   | 1637189_at   | 1637403_at   | 1637648_at   | 1637960_at   | 1638226_at   |
| 1636894_s_at | 1637191_at   | 1637417_at   | 1637649_at   | 1637963_at   | 1638246_at   |
| 1636918_a_at | 1637192_at   | 1637429_at   | 1637662_at   | 1637969_at   | 1638259_s_at |
| 1636926_s_at | 1637255_a_at | 1637461_at   | 1637669_at   | 1637973_a_at | 1638265_s_at |
| 1636943_s_at | 1637269_at   | 1637466_at   | 1637679_s_at | 1637983_s_at | 1638277_at   |
| 1636948_a_at | 1637271_a_at | 1637469_at   | 1637689_at   | 1638009_s_at | 1638282_at   |
| 1636950_at   | 1637284_at   | 1637481_at   | 1637713_at   | 1638011_a_at | 1638296_at   |
| 1636995_at   | 1637291_at   | 1637499_s_at | 1637717_at   | 1638020_at   | 1638312_at   |
| 1637007_s_at | 1637307_at   | 1637513_at   | 1637733_at   | 1638053_at   | 1638321_s_at |
| 1637008_at   | 1637309_a_at | 1637515_s_at | 1637773_s_at | 1638080_at   | 1638335_at   |
| 1637027_s_at | 1637314_at   | 1637518_at   | 1637780_a_at | 1638092_a_at | 1638342_at   |
| 1637079_at   | 1637317_at   | 1637551_at   | 1637815_s_at | 1638100_s_at | 1638343_at   |
| 1637097_at   | 1637319_at   | 1637557_a_at | 1637826_at   | 1638112_at   | 1638361_at   |

|              |              |              |              |              |              |
|--------------|--------------|--------------|--------------|--------------|--------------|
| 1638411_at   | 1638716_a_at | 1638981_at   | 1639265_at   | 1639579_s_at | 1639856_at   |
| 1638445_a_at | 1638758_at   | 1639040_s_at | 1639268_at   | 1639584_at   | 1639862_at   |
| 1638447_s_at | 1638763_at   | 1639046_at   | 1639286_s_at | 1639594_at   | 1639868_at   |
| 1638469_s_at | 1638770_a_at | 1639072_at   | 1639323_at   | 1639611_at   | 1639874_at   |
| 1638499_s_at | 1638782_at   | 1639075_a_at | 1639346_at   | 1639621_at   | 1639891_at   |
| 1638523_at   | 1638807_s_at | 1639079_at   | 1639361_a_at | 1639622_at   | 1639898_at   |
| 1638526_a_at | 1638809_at   | 1639111_at   | 1639366_at   | 1639640_at   | 1639903_at   |
| 1638539_at   | 1638811_at   | 1639138_at   | 1639374_s_at | 1639653_at   | 1639911_at   |
| 1638544_at   | 1638816_at   | 1639139_a_at | 1639377_at   | 1639663_at   | 1639913_at   |
| 1638592_at   | 1638833_at   | 1639148_at   | 1639383_a_at | 1639665_at   | 1639927_at   |
| 1638603_at   | 1638846_at   | 1639171_at   | 1639400_at   | 1639667_at   | 1639932_at   |
| 1638619_s_at | 1638852_at   | 1639179_at   | 1639410_at   | 1639683_at   | 1639937_at   |
| 1638635_at   | 1638875_at   | 1639198_at   | 1639411_at   | 1639692_s_at | 1639972_at   |
| 1638642_at   | 1638884_at   | 1639202_a_at | 1639421_at   | 1639721_at   | 1639974_a_at |
| 1638649_at   | 1638903_at   | 1639203_at   | 1639424_at   | 1639737_at   | 1639982_at   |
| 1638652_at   | 1638919_at   | 1639211_at   | 1639461_a_at | 1639748_at   | 1639993_at   |
| 1638667_a_at | 1638923_at   | 1639215_at   | 1639494_at   | 1639757_at   | 1640006_at   |
| 1638670_a_at | 1638930_s_at | 1639222_at   | 1639519_at   | 1639762_at   | 1640020_at   |
| 1638699_at   | 1638963_s_at | 1639236_at   | 1639527_at   | 1639787_at   | 1640066_at   |
| 1638708_s_at | 1638973_s_at | 1639255_s_at | 1639566_s_at | 1639816_at   | 1640082_at   |
| 1638709_at   | 1638974_at   | 1639264_at   | 1639567_at   | 1639842_at   | 1640101_at   |

|              |              |              |              |              |              |
|--------------|--------------|--------------|--------------|--------------|--------------|
| 1640109_at   | 1640318_at   | 1640540_at   | 1640781_a_at | 1641179_at   | 1641370_s_at |
| 1640112_at   | 1640333_at   | 1640552_at   | 1640782_at   | 1641189_a_at | 1641378_at   |
| 1640130_at   | 1640335_at   | 1640555_at   | 1640825_a_at | 1641191_s_at | 1641390_at   |
| 1640134_a_at | 1640336_at   | 1640567_at   | 1640827_at   | 1641212_a_at | 1641399_at   |
| 1640158_at   | 1640341_s_at | 1640584_at   | 1640883_a_at | 1641236_s_at | 1641403_at   |
| 1640162_at   | 1640351_s_at | 1640590_at   | 1640886_a_at | 1641241_at   | 1641412_at   |
| 1640167_s_at | 1640355_at   | 1640621_at   | 1640917_at   | 1641252_at   | 1641420_s_at |
| 1640169_s_at | 1640365_s_at | 1640661_at   | 1640918_at   | 1641256_at   | 1641424_at   |
| 1640185_at   | 1640379_s_at | 1640695_at   | 1640952_at   | 1641262_at   | 1641427_at   |
| 1640191_a_at | 1640380_a_at | 1640713_at   | 1640980_at   | 1641270_at   | 1641445_s_at |
| 1640212_at   | 1640425_at   | 1640714_at   | 1640991_at   | 1641278_at   | 1641458_s_at |
| 1640215_at   | 1640426_at   | 1640720_a_at | 1640999_at   | 1641285_at   | 1641461_at   |
| 1640216_at   | 1640445_at   | 1640732_s_at | 1641011_at   | 1641303_at   | 1641469_at   |
| 1640220_a_at | 1640451_at   | 1640734_a_at | 1641038_at   | 1641306_at   | 1641478_s_at |
| 1640228_at   | 1640486_s_at | 1640744_a_at | 1641058_at   | 1641309_s_at | 1641479_at   |
| 1640242_s_at | 1640492_at   | 1640746_at   | 1641065_s_at | 1641320_s_at | 1641481_at   |
| 1640244_at   | 1640497_at   | 1640754_at   | 1641105_at   | 1641324_at   | 1641486_at   |
| 1640257_at   | 1640504_at   | 1640755_at   | 1641115_at   | 1641330_at   | 1641496_a_at |
| 1640265_a_at | 1640507_s_at | 1640759_at   | 1641129_at   | 1641337_at   | 1641502_a_at |
| 1640301_a_at | 1640520_at   | 1640762_at   | 1641143_s_at | 1641341_at   | 1641522_at   |
| 1640303_a_at | 1640529_at   | 1640765_at   | 1641178_s_at | 1641350_at   | 1641530_s_at |

|              |              |              |            |              |              |
|--------------|--------------|--------------|------------|--------------|--------------|
| 1641537_s_at | 1641570_s_at | 1641603_s_at | 1641634_at | 1641664_at   | 1641711_at   |
| 1641540_a_at | 1641575_at   | 1641606_s_at | 1641642_at | 1641681_s_at | 1641715_at   |
| 1641541_a_at | 1641579_at   | 1641624_at   | 1641653_at | 1641701_at   | 1641745_a_at |
| 1641549_at   | 1641598_at   | 1641626_at   | 1641660_at | 1641704_at   |              |

\*\*\*\*\*



Dep Effects UP regulated FDR < 0.1

|              |              |              |              |              |              |
|--------------|--------------|--------------|--------------|--------------|--------------|
| 1623632_s_at | 1626566_at   | 1630968_at   | 1633727_s_at | 1636591_at   | 1638994_at   |
| 1623693_a_at | 1626575_at   | 1631225_at   | 1633965_at   | 1636682_at   | 1639321_s_at |
| 1623782_at   | 1626650_at   | 1631243_s_at | 1634034_at   | 1636867_s_at | 1639467_at   |
| 1624042_at   | 1627270_at   | 1631374_at   | 1634707_s_at | 1636896_a_at | 1639476_at   |
| 1624464_s_at | 1627280_s_at | 1631385_at   | 1634814_at   | 1637193_at   | 1639611_at   |
| 1624717_s_at | 1627376_at   | 1631426_at   | 1634869_at   | 1637229_a_at | 1639858_s_at |
| 1624943_at   | 1627651_a_at | 1631527_at   | 1634877_at   | 1637611_at   | 1640224_s_at |
| 1625199_s_at | 1627702_at   | 1632146_a_at | 1634904_s_at | 1637671_a_at | 1640296_a_at |
| 1625264_s_at | 1628172_at   | 1632234_at   | 1635202_s_at | 1637872_at   | 1640528_at   |
| 1625290_at   | 1629357_s_at | 1632623_at   | 1635581_at   | 1637940_s_at | 1640754_at   |
| 1625430_at   | 1629839_a_at | 1632916_at   | 1635618_at   | 1638050_s_at | 1640764_at   |
| 1625433_at   | 1629842_at   | 1633026_a_at | 1635619_a_at | 1638186_a_at | 1641126_at   |
| 1625830_a_at | 1629843_s_at | 1633069_s_at | 1635711_s_at | 1638290_at   | 1641233_a_at |
| 1625840_at   | 1630280_s_at | 1633391_at   | 1635904_s_at | 1638325_at   | 1641381_s_at |
| 1626178_s_at | 1630824_a_at | 1633563_at   | 1636423_at   | 1638727_at   | 1641506_at   |
| 1626385_s_at | 1630884_at   | 1633654_s_at | 1636521_at   | 1638875_at   |              |

\*\*\*\*\*

Dep Effects DOWN regulated FDR < 0.1

|              |              |              |              |              |              |
|--------------|--------------|--------------|--------------|--------------|--------------|
| 1622935_at   | 1625027_a_at | 1627888_at   | 1630929_at   | 1634672_at   | 1636762_a_at |
| 1623032_at   | 1625250_at   | 1628194_at   | 1631200_at   | 1634697_at   | 1636829_at   |
| 1623069_s_at | 1625351_at   | 1628296_at   | 1631627_at   | 1635065_at   | 1636921_at   |
| 1623607_at   | 1625375_at   | 1628376_x_at | 1631648_at   | 1635305_s_at | 1636948_a_at |
| 1623766_at   | 1625519_at   | 1628429_at   | 1631877_a_at | 1635491_s_at | 1637124_at   |
| 1623783_at   | 1625814_at   | 1628598_s_at | 1631909_at   | 1635765_at   | 1637392_at   |
| 1623928_at   | 1625954_at   | 1628634_at   | 1631998_at   | 1635769_at   | 1637465_at   |
| 1624158_at   | 1625991_s_at | 1628854_at   | 1632109_s_at | 1635821_at   | 1637547_at   |
| 1624185_at   | 1626075_at   | 1628938_at   | 1632318_at   | 1635871_at   | 1637778_a_at |
| 1624202_a_at | 1626222_at   | 1629117_at   | 1632374_at   | 1635983_a_at | 1638217_at   |
| 1624396_at   | 1626340_at   | 1629391_at   | 1632461_at   | 1635987_at   | 1638224_at   |
| 1624465_at   | 1626503_at   | 1629427_at   | 1632583_at   | 1636014_at   | 1638272_at   |
| 1624466_a_at | 1626811_at   | 1629464_a_at | 1632677_a_at | 1636131_at   | 1638335_at   |
| 1624560_at   | 1626832_at   | 1629476_at   | 1632695_at   | 1636142_at   | 1638350_at   |
| 1624699_s_at | 1627046_at   | 1629718_at   | 1632834_a_at | 1636257_at   | 1638695_at   |
| 1624818_s_at | 1627078_at   | 1629955_at   | 1633197_at   | 1636337_s_at | 1638833_at   |
| 1624840_at   | 1627459_at   | 1630131_at   | 1633463_s_at | 1636460_at   | 1638970_at   |
| 1624888_at   | 1627525_a_at | 1630335_s_at | 1633810_at   | 1636639_at   | 1639071_a_at |
| 1624984_at   | 1627552_at   | 1630408_s_at | 1634575_at   | 1636711_at   | 1639135_at   |

|            |            |              |              |              |            |
|------------|------------|--------------|--------------|--------------|------------|
| 1639152_at | 1639429_at | 1640241_at   | 1640635_a_at | 1641078_s_at | 1641630_at |
| 1639158_at | 1639762_at | 1640293_s_at | 1640824_at   | 1641201_at   |            |
| 1639341_at | 1639993_at | 1640332_at   | 1640826_at   | 1641568_a_at |            |

\*\*\*\*\*

Lin x Dep Effects FDR < 0.1

1632492\_at

1628404\_at

File S2

Functional annotations for probe sets in Figure 6, showing both *Inb* and *Dep* effects

For each pattern we give the list of probe sets and their functional information as provided by the *Functional annotation table* tool in the DAVID web page.

\*\*\*\*\*

+D

C

-D

Probe sets:

|              |            |            |              |              |              |
|--------------|------------|------------|--------------|--------------|--------------|
| 1624717_s_at | 1625840_at | 1631527_at | 1635581_at   | 1637193_at   | 1641126_at   |
| 1625430_at   | 1631385_at | 1632623_at | 1636896_a_at | 1637940_s_at | 1641381_s_at |

Functional annotation table:

| ID           | Gene Name             | Species                 | GOTERM_BP_FAT                                                                                                                                                                                                                                         | GOTERM_CC_FAT | GOTERM_MF_FAT                                                                                                                                                                                                                                                                                                                                                                                                                                                               | INTERPRO                                                                                                                                                 | KEGG_PATHWAY                  | PIR_SUPERFAMILY                                                                        | SMART         | SP_PIR_KEYWORDS              | UP_SEQ_FEATURE                          |                                                                                                                                                           |
|--------------|-----------------------|-------------------------|-------------------------------------------------------------------------------------------------------------------------------------------------------------------------------------------------------------------------------------------------------|---------------|-----------------------------------------------------------------------------------------------------------------------------------------------------------------------------------------------------------------------------------------------------------------------------------------------------------------------------------------------------------------------------------------------------------------------------------------------------------------------------|----------------------------------------------------------------------------------------------------------------------------------------------------------|-------------------------------|----------------------------------------------------------------------------------------|---------------|------------------------------|-----------------------------------------|-----------------------------------------------------------------------------------------------------------------------------------------------------------|
| 1632623_at   | Cytochrome b5-related | Drosophila melanogaster | GO:0006631~fatty acid metabolic process,GO:0006633~fatty acid biosynthetic process,GO:0008610~lipid biosynthetic process,GO:0016053~organic acid biosynthetic process,GO:0046394~carboxylic acid biosynthetic process,GO:0055114~oxidation reduction, |               | GO:0005739~mitochondrion,GO:0005811~lipid particle,GO:0005506~iron ion binding,GO:0009055~electron carrier activity,GO:0016717~oxidoreductase activity, acting on paired donors, with oxidation of a pair of donors resulting in the reduction of molecular oxygen to two molecules of water,GO:0020037~heme binding,GO:0043167~ion binding,GO:0043169~cation binding,GO:0046872~metal ion binding,GO:0046906~tetrapyrrole binding,GO:0046914~transition metal ion binding, | IPR001199:Cytochrome b5,IPR005804:Fatty acid desaturase, type 1,IPR012171:Fatty acid/sphingolipid desaturase,IPR018506:Cytochrome b5, heme-binding site, |                               | PIRSF015921:fatty acid desaturase/sphingolipid desaturase,PIRSF015921:FA_sphinglp_des, |               | complete proteome,           | heme,iron,metal-binding,metalloprotein, | chain:Cytochrome b5-related protein,domain:Cytochrome b5 heme-binding,metal ion-binding site:Iron (heme axial ligand),sequence conflict,sequence variant, |
| 1636896_a_at | Dmel_CG12576          | Drosophila melanogaster |                                                                                                                                                                                                                                                       |               |                                                                                                                                                                                                                                                                                                                                                                                                                                                                             |                                                                                                                                                          |                               |                                                                                        |               | complete proteome,           |                                         |                                                                                                                                                           |
| 1641381_s_at | Dmel_CG13213          | Drosophila melanogaster |                                                                                                                                                                                                                                                       |               |                                                                                                                                                                                                                                                                                                                                                                                                                                                                             | IPR001810:Cyclin-like F-box,IPR018483:Carbohydrate kinase, FGGY, conserved site,                                                                         |                               | PIRSF036853:conserved protein with F-box/LRR-repeat, AtFBL11 type,                     | SM00256:FBOX, | complete proteome,           |                                         |                                                                                                                                                           |
| 1625430_at   | Dmel_CG14022          | Drosophila melanogaster |                                                                                                                                                                                                                                                       |               | GO:0003998~acylphosphatase activity,                                                                                                                                                                                                                                                                                                                                                                                                                                        | IPR001792:Acylphosphatase,IPR001792:Acylphosphatase-like,                                                                                                | dme00620:Pyruvate metabolism, | PIRSF001266:acylphosphatase,                                                           |               | complete proteome,hydrolase, |                                         |                                                                                                                                                           |
| 1631385_at   | Dmel_CG2889           | Drosophila melanogaster |                                                                                                                                                                                                                                                       |               | GO:0008270~zinc ion binding,GO:0043167~ion                                                                                                                                                                                                                                                                                                                                                                                                                                  |                                                                                                                                                          |                               |                                                                                        |               |                              |                                         |                                                                                                                                                           |

binding,GO:0043169~cation binding,GO:0046872~metal ion binding,GO:0046914~transition metal ion binding, IPR007087:Zinc finger, C2H2-type,IPR012934:Zinc finger, AD-  
 type,IPR015880:Zinc finger, C2H2-like, SM00355:ZnF\_C2H2, complete proteome,  
 1624717\_s\_at Dmel\_CG32647 Drosophila melanogaster IPR001007: von Willebrand factor, type C,IPR002052:N-  
 6 adenine-specific DNA methylase, conserved site, SM00214:VWC, complete proteome,methyltransferase,transferase,  
 1635581\_at Dmel\_CG8300 Drosophila melanogaster complete proteome,  
 1637193\_at Eukaryotic translation initiation factor 3 subunit C Drosophila melanogaster GO:0006412~translation,GO:0006413~translational initiation,  
 GO:0005829~cytosol,GO:0005852~eukaryotic translation initiation factor 3 complex, GO:0003743~translation initiation factor activity,GO:0008135~translation factor  
 activity, nucleic acid binding, IPR000717:Proteasome component region PCI,IPR008905:Eukaryotic translation initiation factor 3 subunit 8, N-terminal,IPR011991:Winged helix  
 repressor DNA-binding, PIRSF017001:eukaryotic translation initiation factor 3, subunit 8, SM00088:PINT, complete proteome,cytoplasm,Initiation  
 factor,phosphoprotein,protein biosynthesis, chain:Eukaryotic translation initiation factor 3 subunit C,domain:PCI,modified residue,sequence conflict,  
 1631527\_at Eukaryotic translation initiation factor 3 subunit L Drosophila melanogaster GO:0006412~translation, GO:0003743~translation initiation factor  
 activity,GO:0008135~translation factor activity, nucleic acid binding, IPR019382:RNA polymerase I-associated factor PAF67, complete  
 proteome,cytoplasm,Initiation factor,protein biosynthesis, chain:Eukaryotic translation initiation factor 3 subunit L,  
 1641126\_at Protein LSM12 homolog A Drosophila melanogaster IPR019181:RNA-processing, Lsm domain,  
 complete proteome, chain:Protein LSM12 homolog A,  
 1625840\_at Uncharacterized protein CG12001 Drosophila melanogaster complete proteome,rna editing,  
 chain:Uncharacterized protein CG12001,sequence variant,

\*\*\*\*\*

C  
-D

+D

Probe sets:

|            |              |              |              |            |            |
|------------|--------------|--------------|--------------|------------|------------|
| 1624185_at | 1628598_s_at | 1633463_s_at | 1636762_a_at | 1638335_at | 1640332_at |
| 1628296_at | 1628938_at   | 1636337_s_at | 1637778_a_at | 1640241_at |            |

Functional annotation table:

| ID         | Gene Name       | Species                 | COG_ONTOLOGY   | GOTERM_BP_FAT | GOTERM_CC_FAT | GOTERM_MF_FAT                                                                                                                                                                                                                                                                                                                                                                                                            | INTERPRO                                     | KEGG_PATHWAY                                                                                                                                                                                                                                                                                   | PIR_SUPERFAMILY |
|------------|-----------------|-------------------------|----------------|---------------|---------------|--------------------------------------------------------------------------------------------------------------------------------------------------------------------------------------------------------------------------------------------------------------------------------------------------------------------------------------------------------------------------------------------------------------------------|----------------------------------------------|------------------------------------------------------------------------------------------------------------------------------------------------------------------------------------------------------------------------------------------------------------------------------------------------|-----------------|
| SMART      | SP_PIR_KEYWORDS |                         | UP_SEQ_FEATURE |               |               |                                                                                                                                                                                                                                                                                                                                                                                                                          |                                              |                                                                                                                                                                                                                                                                                                |                 |
| 1624185_at | Dmel_CG1041     | Drosophila melanogaster |                |               |               | GO:0005739~mitochondrion,GO:0005777~peroxisome,GO:0042579~microbody,<br>GO:0004092~carnitine O-acetyltransferase activity,GO:0008374~O-acyltransferase activity,GO:0016406~carnitine O-acyltransferase activity,GO:0016407~acetyltransferase<br>activity,GO:0016413~O-acetyltransferase activity,                                                                                                                        | IPR000542:Acyltransferase ChoActase/COT/CPT, | PIRSF000430:carnitine O-acetyltransferase,                                                                                                                                                                                                                                                     |                 |
| 1628938_at | Dmel_CG10882    | Drosophila melanogaster |                |               |               | GO:0006886~intracellular protein transport,GO:0006888~ER to Golgi vesicle-mediated<br>transport,GO:0008104~protein localization,GO:0015031~protein transport,GO:0016192~vesicle-mediated transport,GO:0034613~cellular protein<br>localization,GO:0045184~establishment of protein localization,GO:0046907~intracellular transport,GO:0048193~Golgi vesicle transport,GO:0070727~cellular macromolecule<br>localization, |                                              | GO:0005794~Golgi apparatus,GO:0005811~lipid particle,GO:0012505~endomembrane system,GO:0012506~vesicle membrane,GO:0012507~ER to Golgi<br>transport vesicle membrane,GO:0016023~cytoplasmic membrane-bounded vesicle,GO:0030117~membrane coat,GO:0030120~vesicle coat,GO:0030127~COPII vesicle |                 |



coat,GO:0030133~transport vesicle,GO:0030134~ER to Golgi transport vesicle,GO:0030135~coated vesicle,GO:0030658~transport vesicle membrane,GO:0030659~cytoplasmic vesicle membrane,GO:0030662~coated vesicle membrane,GO:0031090~organelle membrane,GO:0031410~cytoplasmic vesicle,GO:0031982~vesicle,GO:0031988~membrane-bounded vesicle,GO:0044431~Golgi apparatus part,GO:0044433~cytoplasmic vesicle part,GO:0048475~coated membrane,GO:0004175~endopeptidase activity,GO:0004252~serine-type endopeptidase activity,GO:0008233~peptidase activity,GO:0008236~serine-type peptidase activity,GO:0008270~zinc ion binding,GO:0017171~serine hydrolase activity,GO:0043167~ion binding,GO:0043169~cation binding,GO:0046872~metal ion binding,GO:0046914~transition metal ion binding,GO:0070011~peptidase activity, acting on L-amino acid peptides, IPR000183:Orn/DAP/Arg decarboxylase 2,IPR000276:7TM GPCR, rhodopsin-like,IPR006031:XYPPX repeat,IPR006895:Zinc finger, Sec23/Sec24-type,IPR006896:Sec23/Sec24 trunk region,IPR006900:Sec23/Sec24 helical region,IPR007123:Gelsolin region,IPR012990:Sec23/Sec24 beta-sandwich, complete proteome,hydrolase,protein transport,transport,

1628598\_s\_at Dmel\_CG1250 Drosophila melanogaster Intracellular trafficking and secretion, GO:0002164~larval development,GO:0002165~instar larval or pupal development,GO:0002168~instar larval development,GO:0003002~regionalization,GO:0006886~intracellular protein transport,GO:0006888~ER to Golgi vesicle-mediated transport,GO:0007030~Golgi organization,GO:0007389~pattern specification process,GO:0007591~molting cycle, chitin-based cuticle,GO:0007592~protein-based cuticle development,GO:0008104~protein localization,GO:0008363~larval chitin-based cuticle development,GO:0009791~post-embryonic development,GO:0010721~negative regulation of cell development,GO:0010769~regulation of cell morphogenesis involved in differentiation,GO:0010975~regulation of neuron projection development,GO:0015031~protein transport,GO:0016192~vesicle-mediated transport,GO:0018988~molting cycle, protein-based cuticle,GO:0022404~molting cycle process,GO:0022604~regulation of cell morphogenesis,GO:0031344~regulation of cell projection organization,GO:0031345~negative regulation of cell projection organization,GO:0034613~cellular protein localization,GO:0035017~cuticle pattern formation,GO:0035293~chitin-based larval cuticle pattern formation,GO:0040003~chitin-based cuticle development,GO:0042303~molting cycle,GO:0042335~cuticle development,GO:0042336~protein-based cuticle development during molting,GO:0042337~chitin-based cuticle development during molting,GO:0045184~establishment of protein localization,GO:0045596~negative regulation of cell differentiation,GO:0045664~regulation of neuron differentiation,GO:0046907~intracellular transport,GO:0048193~Golgi vesicle transport,GO:0048814~regulation of dendrite morphogenesis,GO:0050767~regulation of neurogenesis,GO:0050768~negative regulation of neurogenesis,GO:0050773~regulation of dendrite development,GO:0050774~negative regulation of dendrite morphogenesis,GO:0051129~negative regulation of cellular component organization,GO:0051960~regulation of nervous system development,GO:0060284~regulation of cell

development,GO:0070727~cellular macromolecule localization, GO:0005783~endoplasmic reticulum,GO:0005794~Golgi apparatus,GO:0005795~Golgi stack,GO:0012505~endomembrane system,GO:0012506~vesicle membrane,GO:0012507~ER to Golgi transport vesicle membrane,GO:0016023~cytoplasmic membrane-bounded vesicle,GO:0030117~membrane coat,GO:0030120~vesicle coat,GO:0030127~COPII vesicle coat,GO:0030133~transport vesicle,GO:0030134~ER to Golgi transport vesicle,GO:0030135~coated vesicle,GO:0030658~transport vesicle membrane,GO:0030659~cytoplasmic vesicle membrane,GO:0030662~coated vesicle membrane,GO:0031090~organelle membrane,GO:0031410~cytoplasmic vesicle,GO:0031982~vesicle,GO:0031988~membrane-bounded vesicle,GO:0044431~Golgi apparatus part,GO:0044433~cytoplasmic vesicle part,GO:0048475~coated membrane, GO:0005096~GTPase activator activity,GO:0008047~enzyme activator activity,GO:0008270~zinc ion binding,GO:0030695~GTPase regulator activity,GO:0043167~ion binding,GO:0043169~cation binding,GO:0046872~metal ion binding ,GO:0046914~transition metal ion binding,GO:0060589~nucleoside-triphosphatase regulator activity, IPR006895:Zinc finger, Sec23/Sec24-type,IPR006896:Sec23/Sec24 trunk region,IPR006900:Sec23/Sec24 helical region,IPR007123:Gelsolin region,IPR012990:Sec23/Sec24 beta-sandwich, PIRSF003206:SEC23 protein, protein transport,transport,

1638335\_at Dmel\_CG18493 Drosophila melanogaster GO:0006508~proteolysis, GO:0008233~peptidase activity,GO:0008236~serine-type peptidase activity,GO:0017171~serine hydrolase activity,GO:0070011~peptidase activity, acting on L-amino acid peptides, IPR008758:Peptidase S28, PIRSF016539:Lysosomal Pro-X carboxypeptidase / Dipeptidyl-peptidase 2, complete proteome,

1640332\_at Dmel\_CG6972 Drosophila melanogaster complete proteome,

1640241\_at Dmel\_CG7008 Drosophila melanogaster GO:0010605~negative regulation of macromolecule metabolic process,GO:0010608~posttranscriptional regulation of gene expression,GO:0010629~negative regulation of gene expression,GO:0016246~RNA interference,GO:0016441~posttranscriptional gene silencing,GO:0016458~gene silencing,GO:0031047~gene silencing by RNA,GO:0035194~posttranscriptional gene silencing by RNA,GO:0040029~regulation of gene expression, epigenetic, GO:0005811~lipid particle,GO:0016442~RNA-induced silencing complex,GO:0030529~ribonucleoprotein complex,GO:0031332~RNAi effector complex, GO:0003712~transcription cofactor activity,GO:0003713~transcription coactivator activity,GO:0008134~transcription factor binding,GO:0016563~transcription activator activity,GO:0030528~transcription regulator activity, IPR002999:Tudor domain,IPR006021:Staphylococcal nuclease (SNase-like),IPR008191:Maternal tudor protein,IPR016685:RNA-induced silencing complex, nuclease component Tudor-SN,IPR018351:Tudor subgroup, PIRS F017179:RISC-Tudor-SN, SM00318:SNc,SM00333:TUDOR, complete proteome,hydrolase,

1637778\_a\_at Probable glucosamine 6-phosphate N-acetyltransferase *Drosophila melanogaster* GO:0004343~glucosamine 6-phosphate N-acetyltransferase activity,GO:0008080~N-acetyltransferase activity,GO:0016407~acetyltransferase activity,GO:0016410~N-acyltransferase activity,GO:0042802~identical protein binding, IPR000182:GCN5-related N-acetyltransferase,IPR016181:Acyl-CoA N-acyltransferase, dme00520:Amino sugar and nucleotide sugar metabolism, Acyltransferase,complete proteome,transferase, binding site:Substrate,chain:Probable glucosamine 6-phosphate N- acetyltransferase,domain:N-acetyltransferase,region of interest:Acetyl-CoA binding,region of interest:Substrate binding,

1633463\_s\_at Putative polypeptide N-acetylgalactosaminyltransferase 9 *Drosophila melanogaster* GO:0005794~Golgi apparatus,GO:0016021~integral to membrane,GO:0031224~intrinsic to membrane,GO:0004653~polypeptide N-acetylgalactosaminyltransferase activity,GO:0005509~calcium ion binding,GO:0005529~sugar binding,GO:0008376~acetylgalactosaminyltransferase activity,GO:0030145~manganese ion binding,GO:0030246~carbohydrate binding,GO:0043167~ion binding,GO:0043169~cation binding,GO:0046872~metal ion binding,GO:0046914~transition metal ion binding, IPR000772:Ricin B lectin,IPR001173:Glycosyl transferase, family 2, dme00512:O-Glycan biosynthesis, SM00458:RICIN, alternative splicing,calcium,complete proteome,disulfide bond,glycoprotein,glycosyltransferase,golgi apparatus,Lectin,manganese,membrane,Signal-anchor,transferase,transmembrane, chain:Putative polypeptide N- acetylgalactosaminyltransferase 9,compositionally biased region:Gly-rich,disulfide bond,domain:Ricin B-type lectin,glycosylation site:N-linked (GlcNAc...) ,region of interest:Catalytic subdomain A,region of interest:Catalytic subdomain B,sequence conflict,splice variant,topological domain:Cytoplasmic,topological domain:Lumenal,transmembrane region,

1628296\_at polypeptide GalNAc transferase 4 *Drosophila melanogaster* GO:0009311~oligosaccharide metabolic process,GO:0009312~oligosaccharide biosynthetic process,GO:0016051~carbohydrate biosynthetic process, GO:0005794~Golgi apparatus,GO:0005795~Golgi stack,GO:0016021~integral to membrane,GO:0031224~intrinsic to membrane,GO:0044431~Golgi apparatus part, GO:0004653~polypeptide N-acetylgalactosaminyltransferase activity,GO:0005509~calcium ion binding,GO:0005529~sugar binding,GO:0008376~acetylgalactosaminyltransferase activity,GO:0030145~manganese ion binding,GO:0030246~carbohydrate binding,GO:0043167~ion binding,GO:0043169~cation binding,GO:0046872~metal ion binding,GO:0046914~transition metal ion binding, IPR000772:Ricin B lectin,IPR001173:Glycosyl transferase, family 2, dme00512:O-Glycan biosynthesis, SM00458:RICIN, calcium,complete proteome,disulfide bond,glycoprotein,glycosyltransferase,golgi apparatus,Lectin,manganese,membrane,Signal-anchor,transferase,transmembrane, chain:N-acetylgalactosaminyltransferase 4,disulfide bond,domain:Ricin B-type

lectin, glycosylation site: N-linked (GlcNAc...), region of interest: Catalytic subdomain A, region of interest: Catalytic subdomain B, topological domain: Cytoplasmic, topological domain: Lumenal, transmembrane region,

1636337\_s\_at polypeptide GalNAc transferase 6 *Drosophila melanogaster* GO:0009311~oligosaccharide metabolic process, GO:0009312~oligosaccharide biosynthetic process, GO:0016051~carbohydrate biosynthetic process, GO:0005794~Golgi apparatus, GO:0005795~Golgi stack, GO:0016021~integral to membrane, GO:0031224~intrinsic to membrane, GO:0044431~Golgi apparatus part, GO:0004653~polypeptide N-acetylgalactosaminyltransferase activity, GO:0005509~calcium ion binding, GO:0005529~sugar binding, GO:0008376~acetylgalactosaminyltransferase activity, GO:0030145~manganese ion binding, GO:0030246~carbohydrate binding, GO:0043167~ion binding, GO:0043169~cation binding, GO:0046872~metal ion binding, GO:0046914~transition metal ion binding, IPR000772:Ricin B lectin, IPR001173:Glycosyl transferase, family 2, dme00512:O-Glycan biosynthesis, SM00458:RICIN, calcium, complete proteome, disulfide bond, glycoprotein, glycosyltransferase, golgi apparatus, Lectin, manganese, membrane, Signal-anchor, transferase, transmembrane, chain:N-acetylgalactosaminyltransferase 6, disulfide bond, domain:Ricin B-type lectin, glycosylation site:N-linked (GlcNAc...), region of interest:Catalytic subdomain A, region of interest:Catalytic subdomain B, sequence conflict, topological domain: Cytoplasmic, topological domain: Lumenal, transmembrane region,

1636762\_a\_at supercoiling factor *Drosophila melanogaster* Signal transduction mechanisms / Cytoskeleton / Cell division and chromosome partitioning / General function prediction only, GO:0006325~chromatin organization, GO:0007549~dosage compensation, GO:0009047~dosage compensation, by hyperactivation of X chromosome, GO:0040029~regulation of gene expression, epigenetic, GO:0051276~chromosome organization, GO:0005694~chromosome, GO:0005700~polytene chromosome, GO:0043228~non-membrane-bounded organelle, GO:0043232~intracellular non-membrane-bounded organelle, GO:0003677~DNA binding, GO:0003916~DNA topoisomerase activity, GO:0005509~calcium ion binding, GO:0043167~ion binding, GO:0043169~cation binding, GO:0046872~metal ion binding, IPR002048:Calcium-binding EF-hand, IPR011992:EF-Hand type, IPR018247:EF-HAND 1, IPR018248:EF hand, IPR018249:EF-HAND 2, SM00054:EFh, calcium,

\*\*\*\*\*

-D

+D

C

Probe sets:

|              |              |              |              |            |              |
|--------------|--------------|--------------|--------------|------------|--------------|
| 1622935_at   | 1625375_at   | 1629391_at   | 1632318_at   | 1636131_at | 1639071_a_at |
| 1623032_at   | 1625814_at   | 1629476_at   | 1632374_at   | 1636711_at | 1639152_at   |
| 1623766_at   | 1626075_at   | 1629718_at   | 1632583_at   | 1636829_at | 1639341_at   |
| 1623783_at   | 1626222_at   | 1629955_at   | 1633810_at   | 1636921_at | 1639993_at   |
| 1623928_at   | 1626503_at   | 1630131_at   | 1634575_at   | 1637124_at | 1640824_at   |
| 1624158_at   | 1626811_at   | 1631200_at   | 1634697_at   | 1637547_at | 1640826_at   |
| 1624699_s_at | 1627078_at   | 1631627_at   | 1635305_s_at | 1638217_at | 1641201_at   |
| 1624840_at   | 1627459_at   | 1631648_at   | 1635821_at   | 1638224_at | 1641568_a_at |
| 1624888_at   | 1627888_at   | 1631877_a_at | 1635983_a_at | 1638272_at |              |
| 1624984_at   | 1628376_x_at | 1631909_at   | 1635987_at   | 1638350_at |              |
| 1625027_a_at | 1628634_at   | 1631998_at   | 1636014_at   | 1638970_at |              |

Functional annotation table:

| ID | Gene Name | Species | COG_ONTOLOGY | GOTERM_BP_FAT | GOTERM_CC_FAT | GOTERM_MF_FAT | INTERPRO | KEGG_PATHWAY | PIR_SUPERFAMILY | SMART |
|----|-----------|---------|--------------|---------------|---------------|---------------|----------|--------------|-----------------|-------|
|----|-----------|---------|--------------|---------------|---------------|---------------|----------|--------------|-----------------|-------|

|  |                 |  |                |  |  |  |  |  |  |  |
|--|-----------------|--|----------------|--|--|--|--|--|--|--|
|  | SP_PIR_KEYWORDS |  | UP_SEQ_FEATURE |  |  |  |  |  |  |  |
|--|-----------------|--|----------------|--|--|--|--|--|--|--|

1624840\_at      Accessory gland-specific peptide 29AB *Drosophila melanogaster*      GO:0007320~insemination,GO:0007321~sperm displacement,GO:0007610~behavior,GO:0007618~mating,GO:0007620~copulation,GO:0019098~reproductive behavior,GO:0032504~multicellular organism reproduction,GO:0045297~post-mating behavior,GO:0046692~sperm competition,GO:0046693~sperm storage,GO:0048609~reproductive process in a multicellular organism, GO:0005576~extracellular region,      GO:0005179~hormone activity,GO:0005529~sugar binding,GO:0005534~galactose binding,GO:0030246~carbohydrate binding,GO:0048029~monosaccharide binding, IPR001304:C-type lectin,IPR016186:C-type lectin-like,IPR018378:C-type lectin, conserved site, SM00034:CLECT,      behavior,complete proteome,disulfide bond,glycoprotein,Lectin,polymorphism,Secreted,signal,      chain:Accessory gland protein Acp29AB,disulfide bond,domain:C-type lectin,glycosylation site:N-linked (GlcNAc...),sequence variant,signal peptide,

1631200\_at      Accessory gland-specific peptide 32CD *Drosophila melanogaster*      GO:0007610~behavior,GO:0007617~mating behavior,GO:0007618~mating,GO:0007621~negative regulation of female receptivity,GO:0019098~reproductive behavior,GO:0032504~multicellular organism reproduction,GO:0033057~reproductive behavior in a multicellular organism,GO:0045297~post-mating behavior,GO:0045434~negative regulation of female receptivity, post-mating,GO:0045924~regulation of female receptivity,GO:0046008~regulation of female receptivity, post-mating,GO:0048609~reproductive process in a multicellular organism,GO:0051705~behavioral interaction between organisms,GO:0060180~female mating behavior,      GO:0005576~extracellular region,      GO:0005179~hormone activity,      alternative initiation,behavior,complete proteome,polymorphism,Secreted,signal,      chain:Accessory gland protein Acp32CD,compositionally biased region:Arg-rich,compositionally biased region:Gly-rich,sequence variant,signal peptide,splice variant,

1628634\_at      Adenosine 3'-phospho 5'-phosphosulfate transporter 2      *Drosophila melanogaster*      GO:0015858~nucleoside transport,GO:0015860~purine nucleoside transport,GO:0015931~nucleobase, nucleoside, nucleotide and nucleic acid transport,GO:0046963~3'-phosphoadenosine 5'-phosphosulfate transport,      GO:0005794~Golgi apparatus,GO:0016021~integral to membrane,GO:0031224~intrinsic to membrane,      GO:0005337~nucleoside transmembrane transporter activity,GO:0015211~purine nucleoside transmembrane transporter activity,GO:0015932~nucleobase, nucleoside, nucleotide and nucleic acid transmembrane transporter activity,GO:0046964~3'-phosphoadenosine 5'-phosphosulfate transmembrane transporter activity,      IPR013657:UAA transporter,      PIRSF017416:solute carrier family 35, member B type,PIRSF500839:solute carrier family 35, member B3,      complete proteome,developmental protein,glycoprotein,golgi apparatus,membrane,phosphoprotein,transmembrane,transport,      chain:Adenosine 3'-phospho 5'-phosphosulfate transporter 2,glycosylation site:N-linked      (GlcNAc...),modified residue,transmembrane region,

1624699\_s\_at      Beadex      Drosophila melanogaster      GO:0002165~instar larval or pupal development,GO:0003002~regionalization,GO:0006897~endocytosis,GO:0006909~phagocytosis,GO:0006911~phagocytosis, engulfment,GO:0007389~pattern specification process,GO:0007444~imaginal disc development,GO:0007472~wing disc morphogenesis,GO:0007476~imaginal disc-derived wing morphogenesis,GO:0007552~metamorphosis,GO:0007560~imaginal disc morphogenesis,GO:0007610~behavior,GO:0007622~rhythmic behavior,GO:0007623~circadian rhythm,GO:0007626~locomotory behavior,GO:0009791~post-embryonic development,GO:0009886~post-embryonic morphogenesis,GO:0010033~response to organic substance,GO:0010324~membrane invagination,GO:0014070~response to organic cyclic substance,GO:0014073~response to tropane,GO:0016044~membrane organization,GO:0016192~vesicle-mediated transport,GO:0035107~appendage morphogenesis,GO:0035108~limb morphogenesis,GO:0035110~leg morphogenesis,GO:0035114~imaginal disc-derived appendage morphogenesis,GO:0035120~post-embryonic appendage morphogenesis,GO:0035218~leg disc development,GO:0035220~wing disc development,GO:0035282~segmentation,GO:0035285~appendage segmentation,GO:0035286~leg segmentation,GO:0042220~response to cocaine,GO:0043279~response to alkaloid,GO:0045475~locomotor rhythm,GO:0048511~rhythmic process,GO:0048512~circadian behavior,GO:0048563~post-embryonic organ morphogenesis,GO:0048569~post-embryonic organ development,GO:0048707~instar larval or pupal morphogenesis,GO:0048736~appendage development,GO:0048737~imaginal disc-derived appendage development,GO:0060173~limb development,      GO:0008270~zinc ion binding,GO:0043167~ion binding,GO:0043169~cation binding,GO:0046872~metal ion binding,GO:0046914~transition metal ion binding,      IPR001781:Zinc finger, LIM-type,      SM00132:LIM,      complete proteome,LIM domain,metal-binding,zinc,

1636131\_at      DNA ligase III      Drosophila melanogaster      GO:0006259~DNA metabolic process,GO:0006260~DNA replication,GO:0006281~DNA repair,GO:0006310~DNA recombination,GO:0006974~response to DNA damage stimulus,GO:0033554~cellular response to stress,      GO:0000166~nucleotide binding,GO:0001882~nucleoside binding,GO:0001883~purine nucleoside binding,GO:0003677~DNA binding,GO:0003909~DNA ligase activity,GO:0003910~DNA ligase (ATP) activity,GO:0005524~ATP binding,GO:0016886~ligase activity, forming phosphoric ester bonds,GO:0017076~purine nucleotide binding,GO:0030554~adenyl nucleotide binding,GO:0032553~ribonucleotide binding,GO:0032555~purine ribonucleotide binding,GO:0032559~adenyl ribonucleotide binding, IPR000977:ATP-dependent DNA ligase,IPR001357:BRCT,IPR012308:DNA ligase, N-terminal,IPR012309:ATP dependent DNA ligase, C-terminal,IPR012310:ATP dependent DNA ligase, central,IPR012340:Nucleic acid-binding, OB-fold,IPR016059:ATP-dependent DNA

ligase, conserved site, dme03410:Base excision repair, SM00292:BRCT, atp-binding, complete proteome, DNA damage, dna recombination, dna repair, dna replication, ligase, nucleotide-binding,

1639071\_a\_at Death related ced-3/Nedd2-like protein Drosophila melanogaster GO:0002697~regulation of immune effector process,GO:0002700~regulation of production of molecular mediator of immune response,GO:0002759~regulation of antimicrobial humoral response,GO:0002784~regulation of antimicrobial peptide production,GO:0002786~regulation of antibacterial peptide production,GO:0002805~regulation of antimicrobial peptide biosynthetic process,GO:0002807~positive regulation of antimicrobial peptide biosynthetic process,GO:0002808~regulation of antibacterial peptide biosynthetic process,GO:0002831~regulation of response to biotic stimulus,GO:0002920~regulation of humoral immune response,GO:0003006~reproductive developmental process,GO:0006508~proteolysis,GO:0006915~apoptosis,GO:0006952~defense response,GO:0006955~immune response,GO:0006963~positive regulation of antibacterial peptide biosynthetic process,GO:0007276~gamete generation,GO:0007281~germ cell development,GO:0007283~spermatogenesis,GO:0007286~spermatid development,GO:0007291~sperm individualization,GO:0007349~cellularization,GO:0008219~cell death,GO:0009617~response to bacterium,GO:0009891~positive regulation of biosynthetic process,GO:0012501~programmed cell death,GO:0016265~death,GO:0016485~protein processing,GO:0019953~sexual reproduction,GO:0031328~positive regulation of cellular biosynthetic process,GO:0032504~multicellular organism reproduction,GO:0042742~defense response to bacterium,GO:0043900~regulation of multi-organism process,GO:0045087~innate immune response,GO:0048232~male gamete generation,GO:0048515~spermatid differentiation,GO:0048609~reproductive process in a multicellular organism,GO:0048610~reproductive cellular process,GO:0050829~defense response to Gram-negative bacterium,GO:0051604~protein maturation,GO:0051605~protein maturation by peptide bond cleavage, GO:0004175~endopeptidase activity,GO:0004197~cysteine-type endopeptidase activity,GO:0008047~enzyme activator activity,GO:0008233~peptidase activity,GO:0008234~cysteine-type peptidase activity,GO:0016504~peptidase activator activity,GO:0070011~peptidase activity, acting on L-amino acid peptides, IPR001309:Peptidase C14, ICE, catalytic subunit p20,IPR002138:Peptidase C14, caspase non-catalytic subunit p10,IPR002398:Peptidase C14, caspase precursor p45,IPR011600:Peptidase C14, caspase catalytic,IPR015917:Peptidase C14, caspase precursor p45, core,IPR016129:Peptidase C14, ICE, catalytic subunit p20, active site, SM00115:CASC, alternative splicing,Apoptosis,complete proteome,cytoplasm,hydrolase,immune response,Protease,thiol protease,zymogen, chain:Caspase-8 subunit p10,chain:Caspase-8 subunit p15,sequence conflict,splice variant,



1634575\_at Dmel\_CG11037 Drosophila melanogaster GO:0006508~proteolysis, GO:0004175~endopeptidase activity,GO:0004252~serine-type endopeptidase activity,GO:0008233~peptidase activity,GO:0008236~serine-type peptidase activity,GO:0017171~serine hydrolase activity,GO:0070011~peptidase activity, acting on L-amino acid peptides, IPR001254:Peptidase S1 and S6, chymotrypsin/Hap,IPR001314:Peptidase S1A, chymotrypsin,IPR018114:Peptidase S1/S6, chymotrypsin/Hap, active site, SM00020:Tryp\_SPc, complete proteome,hydrolase,

1640824\_at Dmel\_CG11306 Drosophila melanogaster GO:0000026~alpha-1,2-mannosyltransferase activity,GO:0000030~mannosyltransferase activity, IPR001296:Glycosyl transferase, group 1, dme00510:N-Glycan biosynthesis, complete proteome,glycosyltransferase,transferase,

1626075\_at Dmel\_CG11664 Drosophila melanogaster GO:0006508~proteolysis, GO:0004175~endopeptidase activity,GO:0004252~serine-type endopeptidase activity,GO:0008233~peptidase activity,GO:0008236~serine-type peptidase activity,GO:0017171~serine hydrolase activity,GO:0070011~peptidase activity, acting on L-amino acid peptides, IPR001254:Peptidase S1 and S6, chymotrypsin/Hap,IPR001314:Peptidase S1A, chymotrypsin, PIRSF001135:trypsin, SM00020:Tryp\_SPc, complete proteome,hydrolase,

1641568\_a\_at Dmel\_CG11790 Drosophila melanogaster GO:0019725~cellular homeostasis,GO:0042592~homeostatic process,GO:0045454~cell redox homeostasis, IPR012335:Thioredoxin fold,IPR013766:Thioredoxin domain, complete proteome,

1635987\_at Dmel\_CG12116 Drosophila melanogaster Secondary metabolites biosynthesis, transport, and catabolism / General function prediction only, GO:0055114~oxidation reduction, GO:0004757~sepiapterin reductase activity, IPR002198:Short-chain dehydrogenase/reductase SDR,IPR016040:NAD(P)-binding domain, dme00790:Folate biosynthesis, complete proteome,oxidoreductase,

1632318\_at Dmel\_CG12773 Drosophila melanogaster GO:0006865~amino acid transport,GO:0015837~amine transport,GO:0015849~organic acid transport,GO:0046942~carboxylic acid transport, GO:0005275~amine transmembrane transporter activity,GO:0008509~anion transmembrane transporter activity,GO:0008511~sodium:potassium:chloride symporter activity,GO:0015171~amino acid transmembrane transporter activity,GO:0015293~symporter activity,GO:0015294~solute:cation symporter activity,GO:0015296~anion:cation symporter activity,GO:0015377~cation:chloride symporter activity, IPR004841:Amino acid permease-associated region, complete proteome,

1622935\_at Dmel\_CG12828 Drosophila melanogaster complete proteome,

1629955\_at Dmel\_CG13309 Drosophila melanogaster GO:0005976~polysaccharide metabolic process,GO:0006022~aminoglycan metabolic process,GO:0006030~chitin metabolic process, GO:0005576~extracellular region, GO:0001871~pattern binding,GO:0008061~chitin binding,GO:0030246~carbohydrate binding,GO:0030247~polysaccharide binding, IPR002557:Chitin binding protein, peritrophin-A, SM00494:ChtBD2, complete proteome,

1632583\_at Dmel\_CG13539 Drosophila melanogaster IPR009961:Protein of unknown function DUF1487, complete proteome,

1628376\_x\_at Dmel\_CG13947 Drosophila melanogaster complete proteome,

1623766\_at Dmel\_CG14054 Drosophila melanogaster complete proteome,

1624158\_at Dmel\_CG14481 Drosophila melanogaster complete proteome,

1638970\_at Dmel\_CG14543 Drosophila melanogaster IPR019398:Pre-rRNA-processing protein TSR2, conserved region, complete proteome,

1639341\_at Dmel\_CG14971 Drosophila melanogaster GO:0016021~integral to membrane,GO:0031224~intrinsic to membrane, IPR004853:Protein of unknown function DUF250, complete proteome,membrane,transmembrane,

1629391\_at Dmel\_CG1656 Drosophila melanogaster GO:0005529~sugar binding,GO:0005534~galactose binding,GO:0030246~carbohydrate binding,GO:0048029~monosaccharide binding, IPR001304:C-type lectin,IPR016186:C-type lectin-like, SM00034:CLECT, complete proteome,

1629718\_at Dmel\_CG16727 Drosophila melanogaster GO:0015101~organic cation transmembrane transporter activity, IPR011701:Major facilitator superfamily MFS-1, complete proteome,transmembrane,

1625027\_a\_at Dmel\_CG17035 Drosophila melanogaster GO:0006644~phospholipid metabolic process,GO:0016042~lipid catabolic process,GO:0019637~organophosphate metabolic process, GO:0005576~extracellular region, GO:0004091~carboxylesterase activity,GO:0004620~phospholipase activity,GO:0004623~phospholipase A2 activity,GO:0005509~calcium ion binding,GO:0016298~lipase activity,GO:0043167~ion binding,GO:0043169~cation binding,GO:0046872~metal ion binding, IPR010711:Phospholipase A2, group XII secretory,IPR013090:Phospholipase A2, active site, dme00564:Glycerophospholipid

metabolism,dme00565:Ether lipid metabolism,dme00590:Arachidonic acid metabolism,dme00591:Linoleic acid metabolism,dme00592:alpha-Linolenic acid metabolism,  
complete proteome,hydrolase,

1639152\_at Dmel\_CG18243 Drosophila melanogaster GO:0000902~cell morphogenesis,GO:0000904~cell morphogenesis involved in  
differentiation,GO:0006470~protein amino acid dephosphorylation,GO:0006793~phosphorus metabolic process,GO:0006796~phosphate metabolic process,GO:0006928~cell  
motion,GO:0007409~axonogenesis,GO:0007411~axon guidance,GO:0016311~dephosphorylation,GO:0030030~cell projection organization,GO:0030182~neuron  
differentiation,GO:0031175~neuron projection development,GO:0032989~cellular component morphogenesis,GO:0032990~cell part morphogenesis,GO:0048666~neuron  
development,GO:0048667~cell morphogenesis involved in neuron differentiation,GO:0048812~neuron projection morphogenesis,GO:0048858~cell projection morphogenesis,  
GO:0004721~phosphoprotein phosphatase activity,GO:0004725~protein tyrosine phosphatase activity,GO:0016791~phosphatase activity,  
IPR000242:Protein-tyrosine phosphatase, receptor/non-receptor type,IPR000387:Dual-specific/protein-tyrosine phosphatase, conserved region,IPR000387:Protein -  
tyrosine phosphatase,IPR000572:Oxidoreductase, molybdopterin binding,IPR003961:Fibronectin, type III,IPR008957:Fibronectin, type III-like fold,IPR016130:Protein-tyrosine  
phosphatase, active site, SM00060:FN3,SM00194:PTPc, hydrolase,  
1626503\_at Dmel\_CG2254 Drosophila melanogaster GO:0055114~oxidation reduction, GO:0005811~lipid particle, IPR002198:Short-chain  
dehydrogenase/reductase SDR,IPR002347:Glucose/ribitol dehydrogenase,IPR016040:NAD(P)-binding domain, PIRSF000126:11beta-hydroxysteroid dehydrogenase,  
complete proteome,oxidoreductase,  
1623032\_at Dmel\_CG2336 Drosophila melanogaster GO:0055114~oxidation reduction, IPR009961:Protein of unknown function DUF1487,  
complete proteome,oxidoreductase,  
1636711\_at Dmel\_CG31265 Drosophila melanogaster GO:0006508~proteolysis, GO:0004175~endopeptidase activity,GO:0004252~serine-type  
endopeptidase activity,GO:0008233~peptidase activity,GO:0008236~serine-type peptidase activity,GO:0017171~serine hydrolase activity,GO:0070011~peptidase activity, acting on  
L-amino acid peptides, IPR001254:Peptidase S1 and S6, chymotrypsin/Hap,IPR001314:Peptidase S1A, chymotrypsin,IPR018114:Peptidase S1/S6, chymotrypsin/Hap, active site,  
PIRSF001135:trypsin, SM00020:Tryp\_SPc, complete proteome,hydrolase,Protease,Serine protease,  
1636014\_at Dmel\_CG31419 Drosophila melanogaster complete proteome,

1636829\_at Dmel\_CG31902 Drosophila melanogaster GO:0004857~enzyme inhibitor activity,GO:0004866~endopeptidase inhibitor activity,GO:0004867~serine-type endopeptidase inhibitor activity,GO:0030414~peptidase inhibitor activity, IPR000215:Protease inhibitor I4, serpin, SM00093:SERPIN, complete proteome,

1625375\_at Dmel\_CG32201 Drosophila melanogaster GO:0006575~cellular amino acid derivative metabolic process,GO:0018208~peptidyl-proline modification,GO:0018401~peptidyl-proline hydroxylation to 4-hydroxy-L-proline,GO:0019471~4-hydroxyproline metabolic process,GO:0055114~oxidation reduction, GO:0005783~endoplasmic reticulum,GO:0016222~procollagen-proline 4-dioxygenase complex,GO:0044432~endoplasmic reticulum part, GO:0004656~procollagen-proline 4-dioxygenase activity,GO:0005506~iron ion binding,GO:0016706~oxidoreductase activity, acting on paired donors, with incorporation or reduction of molecular oxygen, 2-oxoglutarate as one donor, and incorporation of one atom each of oxygen into both donors,GO:0019798~procollagen-proline dioxygenase activity,GO:0019842~vitamin binding,GO:0031406~carboxylic acid binding,GO:0031418~L-ascorbic acid binding,GO:0031543~peptidyl-proline dioxygenase activity,GO:0031545~peptidyl-proline 4-dioxygenase activity,GO:0043167~ion binding,GO:0043169~cation binding,GO:0046872~metal ion binding,GO:0046914~transition metal ion binding, IPR005123:Oxoglutarate and iron-dependent oxygenase,IPR006620:Prolyl 4-hydroxylase, alpha subunit, dme00330:Arginine and proline metabolism, SM00702:P4Hc, oxidoreductase,

1638224\_at Dmel\_CG32250 Drosophila melanogaster GO:0005739~mitochondrion,GO:0005740~mitochondrial envelope,GO:0005743~mitochondrial inner membrane,GO:0005777~peroxisome,GO:0005778~peroxisomal membrane,GO:0005779~integral to peroxisomal membrane,GO:0016021~integral to membrane,GO:0019866~organelle inner membrane,GO:0031090~organelle membrane,GO:0031224~intrinsic to membrane,GO:0031231~intrinsic to peroxisomal membrane,GO:0031300~intrinsic to organelle membrane,GO:0031301~integral to organelle membrane,GO:0031903~microbody membrane,GO:0031966~mitochondrial membrane,GO:0031967~organelle envelope,GO:0031975~envelope,GO:0042579~microbody,GO:0044429~mitochondrial part,GO:0044438~microbody part,GO:0044439~peroxisomal part, IPR001993:Mitochondrial substrate carrier,IPR002113:Adenine nucleotide translocator 1,IPR018108:Mitochondrial substrate/solute carrier, complete proteome,membrane,repeat,transmembrane,transport,

1634697\_at Dmel\_CG32667 Drosophila melanogaster IPR001007:von Willebrand factor, type C, SM00214:VWC, complete proteome,

1640826\_at Dmel\_CG3947 Drosophila melanogaster GO:0007031~peroxisome organization, IPR013919:Peroxisome membrane protein, Pex16, complete proteome,

1626222\_at Dmel\_CG4812 Drosophila melanogaster GO:0006508~proteolysis, GO:0004175~endopeptidase activity,GO:0004252~serine-type endopeptidase activity,GO:0008233~peptidase activity,GO:0008236~serine-type peptidase activity,GO:0017171~serine hydrolase activity,GO:0070011~peptidase activity, acting on L-amino acid peptides, IPR001254:Peptidase S1 and S6, chymotrypsin/Hap,IPR001314:Peptidase S1A, chymotrypsin,IPR018114:Peptidase S1/S6, chymotrypsin/Hap, active site, PIRSF001135:trypsin, SM00020:Tryp\_SpC, complete proteome,hydrolase,Protease,Serine protease,

1641201\_at Dmel\_CG5267 Drosophila melanogaster IPR013032:EGF-like region, conserved site,IPR018453:Protease inhibitor I8, cysteine-rich trypsin inhibitor-like subgroup, complete proteome,

1631627\_at Dmel\_CG5335 Drosophila melanogaster GO:0005529~sugar binding,GO:0030246~carbohydrate binding, IPR001079:Galectin, carbohydrate recognition domain,IPR013320:Concanavalin A-like lectin/glucanase, subgroup, SM00276:GLECT, complete proteome,Lectin,

1626811\_at Dmel\_CG5510 Drosophila melanogaster IPR005052:Legume-like lectin,IPR013320:Concanavalin A-like lectin/glucanase, subgroup, PIRSF017635:L-type lectin, animal type,PIRSF500265:vesicular integral-membrane protein VIP36, complete proteome,

1623928\_at Dmel\_CG5910 Drosophila melanogaster complete proteome,

1630131\_at Dmel\_CG6567 Drosophila melanogaster GO:0004091~carboxylesterase activity,GO:0004620~phospholipase activity,GO:0004622~lysophospholipase activity,GO:0016298~lipase activity, IPR003140:Phospholipase/carboxylesterase, complete proteome,hydrolase,

1627888\_at Dmel\_CG6672 Drosophila melanogaster GO:0006811~ion transport,GO:0006812~cation transport, GO:0005385~zinc ion transmembrane transporter activity,GO:0015082~di-, tri-valent inorganic cation transmembrane transporter activity,GO:0022890~inorganic cation transmembrane transporter activity,GO:0046873~metal ion transmembrane transporter activity,GO:0046915~transition metal ion transmembrane transporter activity, IPR002524:Cation efflux protein, complete proteome,

1632374\_at Dmel\_CG6769 Drosophila melanogaster GO:0008270~zinc ion binding,GO:0043167~ion binding,GO:0043169~cation binding,GO:0046872~metal ion binding,GO:0046914~transition metal ion binding, IPR003604:Zinc finger, U1-type,IPR007087:Zinc finger, C2H2-type,IPR015880:Zinc finger, C2H2-like, SM00355:ZnF\_C2H2,SM00451:ZnF\_U1, complete proteome,

1637124\_at Dmel\_CG6773 Drosophila melanogaster GO:0002164~larval development,GO:0002165~instar larval or pupal development,GO:0002168~instar larval development,GO:0003002~regionalization,GO:0006900~membrane budding,GO:0007389~pattern specification process,GO:0007591~molting cycle, chitin-based cuticle,GO:0007592~protein-based cuticle development,GO:0008363~larval chitin-based cuticle development,GO:0009791~post-embryonic development,GO:0016044~membrane organization,GO:0016050~vesicle organization,GO:0016192~vesicle-mediated transport,GO:0018988~molting cycle, protein-based cuticle,GO:0022404~molting cycle process,GO:0035017~cuticle pattern formation,GO:0035293~chitin-based larval cuticle pattern formation,GO:0040003~chitin-based cuticle development,GO:0042303~molting cycle,GO:0042335~cuticle development,GO:0042336~protein-based cuticle development during molting,GO:0042337~chitin-based cuticle development during molting, IPR001680:WD40 repeat,IPR015943:WD40/YVTN repeat-like,IPR017986:WD40 repeat, region,IP R019781:WD40 repeat, subgroup,IPR019782:WD40 repeat 2, SM00320:WD40, complete proteome,repeat,wd repeat,

1624888\_at Dmel\_CG7081 Drosophila melanogaster GO:0007031~peroxisome organization, GO:0005777~peroxisome,GO:0005778~peroxisomal membrane,GO:0031090~organelle membrane,GO:0031903~microbody membrane,GO:0042579~microbody,GO:0044438~microbody part,GO:0044439~peroxisomal part, GO:0008270~zinc ion binding,GO:0043167~ion binding,GO:0043169~cation binding,GO:0046872~metal ion binding,GO:0046914~transition metal ion binding, IPR001841:Zinc finger, RING-type,IPR006845:Pex, N-terminal,IPR017907:Zinc finger, RING-type, conserved site,IPR018957:Zinc finger, C3HC4 RING-type, SM00184:RING, complete proteome,metal-binding,zinc,zinc-finger,

1629476\_at Dmel\_CG7542 Drosophila melanogaster GO:0006508~proteolysis, GO:0004175~endopeptidase activity,GO:0004252~serine-type endopeptidase activity,GO:0008233~peptidase activity,GO:0008236~serine-type peptidase activity,GO:0017171~serine hydrolase activity,GO:0070011~peptidase activity, acting on L-amino acid peptides, IPR001254:Peptidase S1 and S6, chymotrypsin/Hap,IPR001314:Peptidase S1A, chymotrypsin,IPR018114:Peptidase S1/S6, chymotrypsin/Hap, active site, SM00020:Tryp\_SPc, complete proteome,hydrolase,Protease,Serine protease,

1624984\_at Dmel\_CG8021 Drosophila melanogaster GO:0000166~nucleotide binding,GO:0003723~RNA binding,GO:0003729~mRNA binding,  
IPR000504:RNA recognition motif, RNP-1,IPR012677:Nucleotide-binding, alpha-beta plait, SM00360:RRM, complete proteome,

1637547\_at Dmel\_CG8199 Drosophila melanogaster Energy production and conversion, GO:0006637~acyl-CoA metabolic process,GO:0006732~coenzyme metabolic  
process,GO:0009108~coenzyme biosynthetic process,GO:0046949~acyl-CoA biosynthetic process,GO:0051186~cofactor metabolic process,GO:0051188~cofactor biosynthetic  
process,GO:0055114~oxidation reduction, GO:0005739~mitochondrion,GO:0005759~mitochondrial matrix,GO:0017086~3-methyl-2-oxobutanoate dehydrogenase (lipoamide)  
complex,GO:0031974~membrane-enclosed lumen,GO:0031980~mitochondrial lumen,GO:0043233~organelle lumen,GO:0044429~mitochondrial part,GO:0070013~intracellular  
organelle lumen, GO:0003863~3-methyl-2-oxobutanoate dehydrogenase (2-methylpropanoyl-transferring) activity,GO:0016624~oxidoreductase activity, acting on the aldehyde or  
oxo group of donors, disulfide as acceptor, IPR001017:Dehydrogenase, E1 component, dme00280:Valine, leucine and isoleucine degradation, PIRSF000152:pyruvate  
dehydrogenase (lipoamide) alpha chain, complete proteome,oxidoreductase,

1623783\_at Dmel\_CG8489 Drosophila melanogaster GO:0003006~reproductive developmental process,GO:0007276~gamete generation,GO:0007281~germ cell  
development,GO:0007283~spermatogenesis,GO:0007286~spermatid development,GO:0007291~sperm individualization,GO:0007349~cellularization,GO:0019953~sexual  
reproduction,GO:0032504~multicellular organism reproduction,GO:0048232~male gamete generation,GO:0048515~spermatid differentiation,GO:0048609~reproductive process in  
a multicellular organism,GO:0048610~reproductive cellular process, complete proteome,developmental  
protein,differentiation,glycoprotein,spermatogenesis, chain:Male-specific protein scotti,glycosylation site:N-linked (GlcNAc...),

1633810\_at Dmel\_CG8793 Drosophila melanogaster complete proteome,

1625814\_at Dymeclin Drosophila melanogaster IPR019142:Dymeclin, complete  
proteome,lipoprotein,myristate,phosphoprotein, chain:Dymeclin,lipid moiety-binding region:N-myristoyl glycine,modified residue,

1631877\_a\_at Histidyl-tRNA synthetase Drosophila melanogaster Translation, ribosomal structure and biogenesis, GO:0006399~tRNA metabolic  
process,GO:0006412~translation,GO:0006418~tRNA aminoacylation for protein translation,GO:0006427~histidyl-tRNA aminoacylation,GO:0034660~ncRNA metabolic  
process,GO:0043038~amino acid activation,GO:0043039~tRNA aminoacylation, GO:0000166~nucleotide binding,GO:0001882~nucleoside  
binding,GO:0001883~purine nucleoside binding,GO:0004812~aminoacyl-tRNA ligase activity,GO:0004821~histidine-tRNA ligase activity,GO:0005524~ATP

binding,GO:0016875~ligase activity, forming carbon-oxygen bonds,GO:0016876~ligase activity, forming aminoacyl-tRNA and related compounds,GO:0017076~purine nucleotide binding,GO:0030554~adenyl nucleotide binding,GO:0032553~ribonucleotide binding,GO:0032555~purine ribonucleotide binding,GO:0032559~adenyl ribonucleotide binding, IPR000738:WHEP-TRS,IPR002314:Aminoacyl-tRNA synthetase, class II (G, H, P and S), conserved region,IPR004154:Anticodon-binding,IPR004516 :Histidyl-tRNA synthetase, class IIa,IPR006195:Aminoacyl-tRNA synthetase, class II, conserved region,IPR009068:S15/NS1, RNA-binding,IPR015807:Histidyl-tRNA synthetase, class IIa, subgroup, dme00970:Aminoacyl-tRNA biosynthesis, PIRSF001549:His-tRNA\_synth,PIRSF001549:histidyl-tRNA synthetase, Aminoacyl-tRNA synthetase,complete proteome,ligase,

1635821\_at Mediator complex subunit 28 Drosophila melanogaster GO:0006350~transcription,GO:0006355~regulation of transcription, DNA-dependent,GO:0006357~regulation of transcription from RNA polymerase II promoter,GO:0045449~regulation of transcription,GO:0051252~regulation of RNA metabolic process, GO:0005654~nucleoplasm,GO:0016592~Srb-mediator complex,GO:0031974~membrane-enclosed lumen,GO:0031981~nuclear lumen,GO:0043233~organelle lumen,GO:0044451~nucleoplasm part,GO:0070013~intracellular organelle lumen, GO:0003702~RNA polymerase II transcription factor activity,GO:0016251~general RNA polymerase II transcription factor activity,GO:0016455~RNA polymerase II transcription mediator activity,GO:0030528~transcription regulator activity, activator,coiled coil,complete proteome,nucleus,Transcription,transcription regulation,chain:Mediator of RNA polymerase II transcription subunit 28,compositionally biased region:Pro-rich,

1627459\_at N(6)-adenine-specific DNA methyltransferase 2 homolog Drosophila melanogaster GO:0006730~one-carbon metabolic process,GO:0032259~methylation, IPR002052:N-6 adenine-specific DNA methylase, conserved site,IPR019369:N-6 adenine-specific DNA methylase-related, eukaryotic, complete proteome,methyltransferase,transferase, chain:N(6)-adenine-specific DNA methyltransferase 2 homolog,sequence conflict,

1627078\_at Organic anion transporting polypeptide 58Dc Drosophila melanogaster GO:0006811~ion transport,GO:0006820~anion transport,GO:0015711~organic anion transport, GO:0016021~integral to membrane,GO:0031224~intrinsic to membrane, GO:0008509~anion transmembrane transporter activity,GO:0008514~organic anion transmembrane transporter activity,GO:0015347~sodium-independent organic anion transmembrane transporter activity, IPR002350:Proteinase inhibitor I1, Kazal,IPR004156:Organic anion transporter polypeptide OATP,IPR011497:Protease inhibitor, Kazal-type, SM00280:KAZAL,



1638217\_at Probable dolichol-phosphate mannosyltransferase *Drosophila melanogaster* GO:0006486~protein amino acid glycosylation,GO:0009100~glycoprotein metabolic process,GO:0009101~glycoprotein biosynthetic process,GO:0043413~biopolymer glycosylation,GO:0070085~glycosylation, GO:0005783~endoplasmic reticulum, GO:0000030~mannosyltransferase activity,GO:0004582~dolichyl-phosphate beta-D-mannosyltransferase activity, IPR001173:Glycosyl transferase, family 2, dme00510:N-Glycan biosynthesis, PIRSF005860:dolichyl-phosphate beta-D-mannosyltransferase, complete proteome,endoplasmic reticulum,glycosyltransferase,transferase, chain:Probable dolichol-phosphate mannosyltransferase,

1638350\_at Probable ribosome production factor 1 *Drosophila melanogaster* GO:0006364~rRNA processing,GO:0006396~RNA processing,GO:0016072~rRNA metabolic process,GO:0022613~ribonucleoprotein complex biogenesis,GO:0034470~ncRNA processing,GO:0034660~ncRNA metabolic process,GO:0042254~ribosome biogenesis, GO:0005730~nucleolus,GO:0031974~membrane-enclosed lumen,GO:0031981~nuclear lumen,GO:0043228~non-membrane-bounded organelle,GO:0043232~intracellular non-membrane-bounded organelle,GO:0043233~organelle lumen,GO:0070013~intracellular organelle lumen, GO:0003723~RNA binding,GO:0019843~rRNA binding, IPR007109:Brix domain, PIRSF015949:U3 small nucleolar ribonucleoprotein (snoRNP) complex, Imp4p subunit, complete proteome,nucleus,ribosome biogenesis,rna-binding,rrna processing,rrna-binding, chain:Probable ribosome production factor 1,domain:Brix,region of interest:RNA-binding,

1639993\_at Protein RFT1 homolog *Drosophila melanogaster* GO:0006869~lipid transport,GO:0010876~lipid localization, GO:0016021~integral to membrane,GO:0031224~intrinsic to membrane,GO:0005319~lipid transporter activity, IPR007594:RFT1, dme00510:N-Glycan biosynthesis, complete proteome,membrane,transmembrane, chain:Protein RFT1 homolog,transmembrane region,

1631648\_at Signal recognition particle 9 kDa protein *Drosophila melanogaster* GO:0006417~regulation of translation,GO:0006448~regulation of translational elongation,GO:0006605~protein targeting,GO:0006612~protein targeting to membrane,GO:0006613~cotranslational protein targeting to membrane,GO:0006614~SRP-dependent cotranslational protein targeting to membrane,GO:0006886~intracellular protein transport,GO:0008104~protein localization,GO:0009890~negative regulation of biosynthetic process,GO:0010558~negative regulation of macromolecule biosynthetic process,GO:0010605~negative regulation of macromolecule metabolic process,GO:0010608~posttranscriptional regulation of gene expression,GO:0015031~protein transport,GO:0017148~negative regulation of translation,GO:0031327~negative regulation of cellular biosynthetic process,GO:0032268~regulation of cellular protein metabolic process,GO:0032269~negative regulation of cellular protein metabolic process,GO:0033365~protein localization in organelle,GO:0034613~cellular protein localization,GO:0045047~protein targeting to ER,GO:0045184~establishment of protein

localization,GO:0045900~negative regulation of translational elongation,GO:0046907~intracellular transport,GO:0051248~negative regulation of protein metabolic process,GO:0070727~cellular macromolecule localization,GO:0005786~signal recognition particle, endoplasmic reticulum targeting,GO:0030529~ribonucleoprotein complex,GO:0048500~signal recognition particle, GO:0003723~RNA binding,GO:0003729~mRNA binding,GO:0008312~7S RNA binding, IPR008832:Signal recognition particle, SRP9 subunit,IPR009018:Signal recognition particle, SRP9/SRP14 subunit, dme03060:Protein export, PIRSF017029:signal recognition particle, 9 kDa protein,PIRSF017029:Signal\_recog\_particle\_SRP9, complete proteome,cytoplasm,ribonucleoprotein,rna-binding,signal recognition particle, chain:Signal recognition particle 9 kDa protein,

1638272\_at Signal recognition particle protein 19 Drosophila melanogaster GO:0006605~protein targeting,GO:0006612~protein targeting to membrane,GO:0006613~cotranslational protein targeting to membrane,GO:0006614~SRP-dependent cotranslational protein targeting to membrane,GO:0006886~intracellular protein transport,GO:0008104~protein localization,GO:0015031~protein transport,GO:0033365~protein localization in organelle,GO:0034613~cellular protein localization,GO:0045047~protein targeting to ER,GO:0045184~establishment of protein localization,GO:0046907~intracellular transport,GO:0070727~cellular macromolecule localization, GO:0005786~signal recognition particle, endoplasmic reticulum targeting,GO:0030529~ribonucleoprotein complex,GO:0048500~signal recognition particle, GO:0003723~RNA binding,GO:0008312~7S RNA binding, IPR002778:Signal recognition particle, SRP19 subunit, dme03060:Protein export, PIRSF006433:Signal recognition particle 19 kDa protein,PIRSF500827:Eukaryota signal recognition particle 19 kDa prot ein, complete proteome,cytoplasm,ribonucleoprotein,rna-binding,signal recognition particle, chain:Signal recognition particle 19 kDa protein,compositionally biased region:Poly-Gly,region of interest:Basic region, potentially involved in RNA-binding,sequence conflict,

1635305\_s\_at Trithorax-like Drosophila melanogaster GO:0000087~M phase of mitotic cell cycle,GO:0000278~mitotic cell cycle,GO:0000279~M phase,GO:0000280~nuclear division,GO:0002165~instar larval or pupal development,GO:0006323~DNA packaging,GO:0006325~chromatin organization,GO:0006333~chromatin assembly or disassembly,GO:0006350~transcription,GO:0006355~regulation of transcription, DNA-dependent,GO:0006357~regulation of transcription from RNA polymerase II promoter,GO:0006461~protein complex assembly,GO:0007049~cell cycle,GO:0007067~mitosis,GO:0007276~gamete generation,GO:0007292~female gamete generation,GO:0007444~imaginal disc development,GO:0007472~wing disc morphogenesis,GO:0007476~imaginal disc-derived wing morphogenesis,GO:0007549~dosage compensation,GO:0007552~metamorphosis,GO:0007560~imaginal disc morphogenesis,GO:0009791~post-embryonic development,GO:0009886~post-embryonic

morphogenesis,GO:0009891~positive regulation of biosynthetic process,GO:0010557~positive regulation of macromolecule biosynthetic process,GO:0010604~positive regulation of macromolecule metabolic process,GO:0010628~positive regulation of gene expression,GO:0016568~chromatin modification,GO:0019953~sexual reproduction,GO:0022402~cell cycle process,GO:0022403~cell cycle phase,GO:0031328~positive regulation of cellular biosynthetic process,GO:0031497~chromatin assembly,GO:0032504~multicellular organism reproduction,GO:0033301~cell cycle comprising mitosis without cytokinesis,GO:0035107~appendage morphogenesis,GO:0035114~imaginal disc-derived appendage morphogenesis,GO:0035120~post-embryonic appendage morphogenesis,GO:0035186~syncytial blastoderm mitotic cell cycle,GO:0035220~wing disc development,GO:0040029~regulation of gene expression, epigenetic,GO:0043933~macromolecular complex subunit organization,GO:0045448~mitotic cell cycle, embryonic,GO:0045449~regulation of transcription,GO:0045893~positive regulation of transcription, DNA-dependent,GO:0045935~positive regulation of nucleobase, nucleoside, nucleotide and nucleic acid metabolic process,GO:0045941~positive regulation of transcription,GO:0048285~organelle fission,GO:0048477~oogenesis,GO:0048563~post-embryonic organ morphogenesis,GO:0048569~post-embryonic organ development,GO:0048609~reproductive process in a multicellular organism,GO:0048707~instar larval or pupal morphogenesis,GO:0048736~appendage development,GO:0048737~imaginal disc-derived appendage development,GO:0051173~positive regulation of nitrogen compound metabolic process,GO:0051252~regulation of RNA metabolic process,GO:0051254~positive regulation of RNA metabolic process,GO:0051259~protein oligomerization,GO:0051276~chromosome organization,GO:0051301~cell division,GO:0065003~macromolecular complex assembly,GO:0070271~protein complex biogenesis, GO:0000775~chromosome, centromeric region,GO:0000785~chromatin,GO:0000791~euchromatin,GO:0000792~heterochromatin,GO:0005694~chromosome,GO:0005700~polytene chromosome,GO:0005721~centromeric heterochromatin,GO:0043228~non-membrane-bounded organelle,GO:0043232~intracellular non-membrane-bounded organelle,GO:0044427~chromosomal part, GO:0003677~DNA binding,GO:0003702~RNA polymerase II transcription factor activity,GO:0003704~specific RNA polymerase II transcription factor activity,GO:0008270~zinc ion binding,GO:0016563~transcription activator activity,GO:0030528~transcription regulator activity,GO:0043167~ion binding,GO:0043169~cation binding,GO:0046872~metal ion binding,GO:0046914~transition metal ion binding,GO:0046982~protein heterodimerization activity,GO:0046983~protein dimerization activity, IPR000210:BTB/POZ-like,IPR007087:Zinc finger, C2H2-type,IPR011333:BTB/POZ fold,IPR013069:BTB/POZ,IPR013087:Zinc finger, C2H2-type/integrase, DNA-binding,IPR015318:Zinc finger, GAGAG binding factor,IPR015880:Zinc finger, C2H2-like, SM00225:BTB,SM00355:ZnF\_C2H2, 3d-structure,activator,alternative splicing,cell cycle,cell division,chromatin regulator,complete proteome,developmental protein,differentiation,direct protein sequencing,DNA binding,dna-binding,metal-

binding,mitosis,nucleus,oogenesis,p hosphoprotein,repressor,Transcription,transcription factor,transcription regulation,zinc,zinc-finger, chain:Transcription factor  
 GAGA,compositionally biased region:Gln-rich,domain:BTB,helix,modified residue,region of interest:Interaction with E(bx),sequence conflict,splice variant,strand,turn,zinc finger  
 region:C2H2-type; degenerate,

1631998\_at Ubiquitin carrier protein Drosophila melanogaster GO:0006508~proteolysis,GO:0009057~macromolecule catabolic process,GO:0019941~modification-  
 dependent protein catabolic process,GO:0030163~protein catabolic process,GO:0043632~modification-dependent macromolecule catabolic process,GO:0044257~cellular protein  
 catabolic process,GO:0044265~cellular macromolecule catabolic process,GO:0051603~proteolysis involved in cellular protein catabolic process, GO:0004842~ubiquitin-  
 protein ligase activity,GO:0016879~ligase activity, forming carbon-nitrogen bonds,GO:0016881~acid-amino acid ligase activity,GO:0019787~small conjugating protein ligase activity,  
 IPR000608:Ubiquitin-conjugating enzyme, E2,IPR016135:Ubiquitin-conjugating enzyme/RWD-like, dme04120:Ubiquitin mediated proteolysis,  
 PIRSF001567:ubiquitin-protein ligase E2, SM00212:UBCc, complete proteome,ligase,ubl conjugation pathway,  
 1631909\_at baisier Drosophila melanogaster GO:0003002~regionalization,GO:0003006~reproductive developmental process,GO:0007276~gamete  
 generation,GO:0007281~germ cell development,GO:0007292~female gamete generation,GO:0007308~oocyte construction,GO:0007309~oocyte axis  
 specification,GO:0007310~oocyte dorsal/ventral axis specification,GO:0007311~maternal specification of dorsal/ventral axis, oocyte, germ-line encoded,GO:0007389~pattern  
 specification process,GO:0009798~axis specification,GO:0009950~dorsal/ventral axis specification,GO:0009953~dorsal/ventral pattern formation,GO:0009994~oocyte  
 differentiation,GO:0016192~vesicle-mediated transport,GO:0019953~sexual reproduction,GO:0021700~developmental maturation,GO:0032504~multicellular organism  
 reproduction,GO:0048469~cell maturation,GO:0048477~oogenesis,GO:0048599~oocyte development,GO:0048609~reproductive process in a multicellular  
 organism,GO:0048610~reproductive cellular process, GO:0005794~Golgi apparatus,GO:0005795~Golgi stack,GO:0016021~integral to membran e,GO:0031224~intrinsic  
 to membrane,GO:0044431~Golgi apparatus part, IPR000348:emp24/gp25L/p24,IPR009038:GOLD,IPR015720:TMP21 related, PIRSF005359:conserved  
 hypothetical protein YHR110w, complete proteome,membrane,transmembrane,  
 1636921\_at lethal (2) 06496 Drosophila melanogaster GO:0007017~microtubule-based process,GO:0007018~microtubule-based movement,  
 GO:0005856~cytoskeleton,GO:0005869~dynactin complex,GO:0005875~microtubule associated complex,GO:0015629~actin cytoskeleton,GO:0015630~microtubule

cytoskeleton,GO:0043228~non-membrane-bounded organelle,GO:0043232~intracellular non-membrane-bounded organelle,GO:0044430~cytoskeletal part,  
complete proteome,

1635983\_a\_at no mechanoreceptor potential B Drosophila melanogaster GO:0000902~cell morphogenesis,GO:0007017~microtubule-based  
process,GO:0007018~microtubule-based movement,GO:0007600~sensory perception,GO:0007605~sensory perception of sound,GO:0009296~flagellum  
assembly,GO:0010970~microtubule-based transport,GO:0030030~cell projection organization,GO:0030031~cell projection assembly,GO:0030705~cytoskeleton-dependent  
intracellular transport,GO:0032989~cellular component morphogenesis,GO:0032990~cell part morphogenesis,GO:0035058~sensory cilium assembly,GO:0042073~intraflagellar  
transport,GO:0042384~cilium assembly,GO:0043064~flagellum organization,GO:0046907~intracellular transport,GO:0048858~cell projection  
morphogenesis,GO:0050877~neurological system process,GO:0050890~cognition,GO:0050954~sensory perception of mechanical stimulus,GO:0060271~cilium morphogenesis,  
IPR001440:Tetratricopeptide TPR-1,IPR011990:Tetratricopeptide-like helical,IPR013026:Tetratricopeptide region,IPR019734:Tetratricopeptide repea  
t, SM00028:TPR, complete proteome,receptor,repeat,tpr repeat,

\*\*\*\*\*

C  
+D  
-D

Probe sets:

|              |              |              |              |              |              |
|--------------|--------------|--------------|--------------|--------------|--------------|
| 1623693_a_at | 1625264_s_at | 1626178_s_at | 1627376_at   | 1629839_a_at | 1630824_a_at |
| 1624042_at   | 1625433_at   | 1626566_at   | 1627651_a_at | 1629843_s_at | 1630968_at   |
| 1624943_at   | 1625830_a_at | 1627270_at   | 1629357_s_at | 1630280_s_at | 1631243_s_at |

|              |              |              |              |              |            |
|--------------|--------------|--------------|--------------|--------------|------------|
| 1631426_at   | 1634869_at   | 1635711_s_at | 1636682_at   | 1638994_at   | 1641506_at |
| 1632916_at   | 1634877_at   | 1636423_at   | 1638050_s_at | 1639321_s_at |            |
| 1633965_at   | 1635202_s_at | 1636521_at   | 1638186_a_at | 1640224_s_at |            |
| 1634707_s_at | 1635619_a_at | 1636591_at   | 1638727_at   | 1640754_at   |            |

Functional annotation table:

| ID           | Gene Name             | Species                 | COG_ONTOLOGY   | GOTERM_BP_FAT                                                                                                                                                                                                                                                                                                                                                                                                                                                                                                                                 | GOTERM_CC_FAT                                                                                                                                                          | GOTERM_MF_FAT                                                                                                                      | INTERPRO                                         | KEGG_PATHWAY | PIR_SUPERFAMILY | SMART |
|--------------|-----------------------|-------------------------|----------------|-----------------------------------------------------------------------------------------------------------------------------------------------------------------------------------------------------------------------------------------------------------------------------------------------------------------------------------------------------------------------------------------------------------------------------------------------------------------------------------------------------------------------------------------------|------------------------------------------------------------------------------------------------------------------------------------------------------------------------|------------------------------------------------------------------------------------------------------------------------------------|--------------------------------------------------|--------------|-----------------|-------|
|              | SP_PIR_KEYWORDS       |                         | UP_SEQ_FEATURE |                                                                                                                                                                                                                                                                                                                                                                                                                                                                                                                                               |                                                                                                                                                                        |                                                                                                                                    |                                                  |              |                 |       |
| 1635711_s_at | Ankyrin               | Drosophila melanogaster |                | GO:0007010~cytoskeleton organization,GO:0007016~cytoskeletal anchoring at plasma membrane,GO:0008104~protein localization,GO:0032507~maintenance of protein location in cell,GO:0045185~maintenance of protein location,GO:0051235~maintenance of location,GO:0051651~maintenance of location in cell,                                                                                                                                                                                                                                        | GO:0005886~plasma membrane,GO:0043228~non-membrane-bounded organelle,GO:0043232~intracellular non-membrane-bounded organelle,GO:0045169~fusome,GO:0045170~spectrosome, | GO:0005198~structural molecule activity,GO:0005200~structural constituent of cytoskeleton,GO:0008092~cytoskeletal protein binding, | IPR000488:Death,IPR000906:ZU5,IPR002110:Ankyrin, |              |                 |       |
| 1625264_s_at | Cysteine proteinase-1 | Drosophila melanogaster |                | GO:0002165~instar larval or pupal development,GO:0006508~proteolysis,GO:0007431~salivary gland development,GO:0007435~salivary gland morphogenesis,GO:0007552~metamorphosis,GO:0007559~histolysis,GO:0007586~digestion,GO:0008219~cell death,GO:0009057~macromolecule catabolic process,GO:0009791~post-embryonic development,GO:0009886~post-embryonic morphogenesis,GO:0012501~programmed cell death,GO:0016265~death,GO:0016271~tissue death,GO:0022612~gland morphogenesis,GO:0030163~protein catabolic process,GO:0035070~salivary gland |                                                                                                                                                                        |                                                                                                                                    |                                                  |              |                 |       |

histolysis,GO:0035071~salivary gland cell autophagic cell death,GO:0035272~exocrine system development,GO:0048102~autophagic cell death,GO:0048707~instar larval or pupal morphogenesis,GO:0048732~gland development, GO:0000323~lytic vacuole,GO:0005764~lysosome,GO:0005773~vacuole, GO:0004175~endopeptidase activity,GO:0004197~cysteine-type endopeptidase activity,GO:0008233~peptidase activity,GO:0008234~cysteine-type peptidase activity,GO: 0070011~peptidase activity, acting on L-amino acid peptides, IPR000169:Peptidase, cysteine peptidase active site,IPR000668:Peptidase C1A, papain C-terminal,IPR013128:Peptidase C1A, papain,IPR013201:Proteinase inhibitor I29, cathepsin propeptide, dme04142:Lysosome, PIRSF001182:papain, SM00645:Pept\_C1, alternative splicing,complete proteome,developmental protein,digestion,disulfide bond,glycoprotein,hydrolase,lysosome,Protease,signal,thiol protease,zymogen, chain:Cathepsin L heavy chain,chain:Cathepsin L light chain,disulfide bond,glycosylation site:N-linked (GlcNAc...),propeptide:Activation peptide,sequence conflict,signal peptide,splice variant,

1638994\_at Dmel\_CG10627 Drosophila melanogaster GO:0000287~magnesium ion binding,GO:0004610~phosphoacetylglucosamine mutase activity,GO:0016866~intramolecular transferase activity,GO:0016868~intramolecular transferase activity, phosphotransferases,GO:0043167~ion binding,GO:0043169~cation binding,GO:0046872~metal ion binding, IPR005843:Alpha-D-phosphohexomutase, C-terminal,IPR005844:Alpha-D-phosphohexomutase, alpha/beta/alpha domain I,IPR005845:Alpha-D-phosphohexomutase, alpha/beta/alpha domain II,IPR016055:Alpha-D-phosphohexomutase, alpha/beta/alpha I, II and III,IPR016066:Alpha-D-phosphohexomutase, conserved site,IPR016657:Phosphoacetylglucosamine mutase, dme00520:Amino sugar and nucleotide sugar metabolism, PIRSF016408:PAGM,PIRSF016408:phosphoacetylglucosamine mutase, complete proteome,Isomerase,magnesium,metal-binding,

1641506\_at Dmel\_CG12400 Drosophila melanogaster GO:0006091~generation of precursor metabolites and energy,GO:0006119~oxidative phosphorylation,GO:0006120~mitochondrial electron transport, NADH to ubiquinone,GO:0006793~phosphorus metabolic process,GO:0006796~phosphate metabolic process,GO:0015980~energy derivation by oxidation of organic compounds,GO:0016310~phosphorylation,GO:0022900~electron transport chain,GO:0022904~respiratory electron transport chain,GO:0042773~ATP synthesis coupled electron transport,GO:0042775~mitochondrial ATP synthesis coupled electron transport,GO:0045333~cellular respiration,GO:0055114~oxidation reduction, GO:0005739~mitochondrion,GO:0005740~mitochondrial envelope,GO:0005743~mitochondrial inner membrane,GO:0005746~mitochondrial respiratory chain,GO:0005747~mitochondrial respiratory chain complex I,GO:0019866~organelle inner membrane,GO:0030964~NADH dehydrogenase complex,GO:0031090~organelle membrane,GO:0031966~mitochondrial membrane,GO:0031967~organelle envelope,GO:0031975~envelope,GO:0044429~mitochondrial part,GO:0044455~mitochondrial membrane part,GO:0045271~respiratory chain complex I,GO:0070469~respiratory chain,

GO:0003954~NADH dehydrogenase activity,GO:0008137~NADH dehydrogenase (ubiquinone) activity,GO:0016651~oxidoreductase activity, acting on NADH or NADPH,GO:0016655~oxidoreductase activity, acting on NADH or NADPH, quinone or similar compound as acceptor,GO:0050136~NADH dehydrogenase (quinone) activity, IPR009423:NADH:ubiquinone oxidoreductase, subunit b14.5b, dme00190:Oxidative phosphorylation, PIRSF017834:NADH-UbQ\_OxRdtase\_b14.5b, complete proteome,oxidoreductase,

1640224\_s\_at Dmel\_CG13796 Drosophila melanogaster GO:0006836~neurotransmitter transport, GO:0005886~plasma membrane,GO:0005887~integral to plasma membrane,GO:0016021~integral to membrane,GO:0031224~intrinsic to membrane,GO:0031226~intrinsic to plasma membrane,GO:0044459~plasma membrane part, GO:0005275~amine transmembrane transporter activity,GO:0005326~neurotransmitter transporter activity,GO:0005328~neurotransmitter:sodium symporter activity,GO:0015171~amino acid transmembrane transporter activity,GO:0015175~neutral amino acid transmembrane transporter activity,GO:0015187~glycine transmembrane transporter activity,GO:0015293~symporter activity,GO:0015294~solute:cation symporter activity,GO:0015370~solute:sodium symporter activity, IPR000175:Sodium:neurotransmitter symporter,IPR000792:Transcription regulator LuxR, C-terminal, SM00421:HTH\_LUXR, Symport,transmembrane,transport,

1630968\_at Dmel\_CG13907 Drosophila melanogaster GO:0008028~monocarboxylic acid transmembrane transporter activity,GO:0015355~secondary active monocarboxylate transmembrane transporter activity, IPR011701:Major facilitator superfamily MFS-1, complete proteome,

1634877\_at Dmel\_CG15546 Drosophila melanogaster complete proteome,

1624943\_at Dmel\_CG1636 Drosophila melanogaster complete proteome,

1636521\_at Dmel\_CG1981 Drosophila melanogaster GO:0006259~DNA metabolic process,GO:0006281~DNA repair,GO:0006289~nucleotide-excision repair,GO:0006298~mismatch repair,GO:0006974~response to DNA damage stimulus,GO:0033554~cellular response to stress,GO:0034984~cellular response to DNA damage stimulus, GO:0000700~mismatch base pair DNA N-glycosylase activity,GO:0003677~DNA binding,GO:0003690~double-stranded DNA binding,GO:0008263~pyrimidine-specific mismatch base pair DNA N-glycosylase activity,GO:0016799~hydrolase activity, hydrolyzing N-glycosyl compounds,GO:0019104~DNA N-glycosylase



activity,GO:0043566~structure-specific DNA binding, IPR005122:Uracil-DNA glycosylase-like,IPR015637:DNA glycosylase, G/T mismatch,IPR017956:AT hook, DNA-binding,  
 conserved site, dme03410:Base excision repair, SM00384:AT\_hook, complete proteome,

1632916\_at Dmel\_CG31357 Drosophila melanogaster General function prediction only, IPR006594:LisH dimerisation motif,IPR006595:CTLH, C-  
 terminal to LisH motif,IPR013144:Ran binding protein-like, CRA domain, SM00667:LisH,SM00668:CTLH,SM00757:CRA, complete proteome,

1636682\_at Dmel\_CG31778 Drosophila melanogaster GO:0004857~enzyme inhibitor activity,GO:0004866~endopeptidase inhibitor  
 activity,GO:0004867~serine-type endopeptidase inhibitor activity,GO:0030414~peptidase inhibitor activity, IPR002223:Proteinase inhibitor I2, Kunitz metazoa,  
 SM00131:KU, complete proteome,

1626178\_s\_at Dmel\_CG32149 Drosophila melanogaster GO:0004427~inorganic diphosphatase activity, IPR000198:RhoGAP,IPR008162:Inorganic  
 pyrophosphatase, SM00324:RhoGAP, complete proteome,hydrolase,

1631426\_at Dmel\_CG32412 Drosophila melanogaster GO:0006508~proteolysis, GO:0008233~peptidase activity,GO:0016603~glutaminy-peptide  
 cyclotransferase activity,GO:0016755~transferase activity, transferring amino-acyl groups, IPR007484:Peptidase M28, Acyltransferase,complete  
 proteome,hydrolase,transferase,

1630824\_a\_at Dmel\_CG33145 Drosophila melanogaster GO:0006486~protein amino acid glycosylation,GO:0009100~glycoprotein metabolic  
 process,GO:0009101~glycoprotein biosynthetic process,GO:0043413~biopolymer glycosylation,GO:0070085~glycosylation, GO:0005794~Golgi apparatus,GO:0016021~integral to  
 membrane,GO:0031224~intrinsic to membrane,GO:0008378~galactosyltransferase activity,GO:0008499~UDP-galactose:beta-N-acetylglucosamine beta-1,3-galactosyltransferase  
 activity,GO:0035250~UDP-galactosyltransferase activity,GO:0048531~beta-1,3-galactosyltransferase activity, IPR002659:Glycosyl transferase, family 31,  
 complete proteome,glycosyltransferase,golgi apparatus,membrane,transferase,transmembrane,

1623693\_a\_at Dmel\_CG3365 Drosophila melanogaster GO:0032012~regulation of ARF protein signal transduction,GO:0032312~regulation of ARF GTPase  
 activity,GO:0032318~regulation of Ras GTPase activity,GO:0043087~regulation of GTPase activity,GO:0046578~regulation of Ras protein signal transduction,GO:0051056~regulation  
 of small GTPase mediated signal transduction,GO:0051336~regulation of hydrolase activity, GO:0005083~small GTPase regulator activity,GO:0005096~GTPase  
 activator activity,GO:0008047~enzyme activator activity,GO:0008060~ARF GTPase activator activity,GO:0008270~zinc ion binding,GO:0030695~GTPase regulator

activity,GO:0043167~ion binding,GO:0043169~cation binding,GO:0046872~metal ion binding,GO:0046914~transition metal ion binding,GO:0060589~nucleoside-triphosphatase  
 regulator activity, IPR001164:Arf GTPase activating protein, SM00105:ArfGap, complete proteome,

1627270\_at Dmel\_CG42240 Drosophila melanogaster complete proteome,

1630280\_s\_at Dmel\_CG42353; Dmel\_CG42354 Drosophila melanogaster complete proteome,

1634869\_at Dmel\_CG4581 Drosophila melanogaster GO:0006631~fatty acid metabolic process,GO:0006635~fatty acid beta-oxidation,GO:0009062~fatty acid  
 catabolic process,GO:0016042~lipid catabolic process,GO:0016054~organic acid catabolic process,GO:0019395~fatty acid oxidation,GO:0030258~lipid  
 modification,GO:0034440~lipid oxidation,GO:0044242~cellular lipid catabolic process,GO:0046395~carboxylic acid catabolic process,GO:0055114~oxidation reduction,  
 GO:0005739~mitochondrion,GO:0005759~mitochondrial matrix,GO:0005811~lipid particle,GO:0016507~fatty acid beta-oxidation multienzyme  
 complex,GO:0031974~membrane-enclosed lumen,GO:0031980~mitochondrial lumen,GO:0043233~organelle lumen,GO:0044429~mitochondrial part,GO:0070013~intracellular  
 organelle lumen, GO:0003988~acetyl-CoA C-acyltransferase activity,GO:0016408~C-acyltransferase activity,GO:0016509~long-chain-3-hydroxyacyl-CoA dehydrogenase activity,  
 IPR002155:Thiolase,IPR016038:Thiolase-like, subgroup, dme00062:Fatty acid elongation in mitochondria,dme00071:Fatty acid metabolism,dme00280:Valine, leucine  
 and isoleucine degradation, PIRSF000429:Ac-CoA\_Ac\_transf, Acyltransferase,complete proteome,oxidoreductase,transferase,

1635202\_s\_at Dmel\_CG5640 Drosophila melanogaster IPR001440:Tetratricopeptide TPR-1,IPR003347:Transcription factor jumonji/aspartyl  
 beta-hydroxylase,IPR011990:Tetratricopeptide-like helical,IPR013026:Tetratricopeptide region,IPR013129:Transcription factor jumonji,IPR019734:Tetratricopeptide repeat,  
 SM00028:TPR,SM00558:JmjC, complete proteome,repeat,tpr repeat,

1633965\_at Dmel\_CG6020 Drosophila melanogaster GO:0006091~generation of precursor metabolites and energy,GO:0006119~oxidative  
 phosphorylation,GO:0006120~mitochondrial electron transport, NADH to ubiquinone,GO:0006793~phosphorus metabolic process,GO:0006796~phosphate metabolic  
 process,GO:0015980~energy derivation by oxidation of organic compounds,GO:0016310~phosphorylation,GO:0022900~electron transport chain,GO:0022904~respiratory electron  
 transport chain,GO:0042773~ATP synthesis coupled electron transport,GO:0042775~mitochondrial ATP synthesis coupled electron transport,GO:0045333~cellular  
 respiration,GO:0055114~oxidation reduction, GO:0005739~mitochondrion,GO:0005740~mitochondrial envelope,GO:0005743~mitochondrial inner  
 membrane,GO:0005746~mitochondrial respiratory chain,GO:0005747~mitochondrial respiratory chain complex I,GO:0019866~organelle inner membrane,GO:0030964~NADH

dehydrogenase complex,GO:0031090~organelle membrane,GO:0031966~mitochondrial membrane,GO:0031967~organelle envelope,GO:0031975~envelope  
,GO:0044429~mitochondrial part,GO:0044455~mitochondrial membrane part,GO:0045271~respiratory chain complex I,GO:0070469~respiratory chain,  
GO:0003954~NADH dehydrogenase activity,GO:0008137~NADH dehydrogenase (ubiquinone) activity,GO:0016651~oxidoreductase activity, acting on NADH or  
NADPH,GO:0016655~oxidoreductase activity, acting on NADH or NADPH, quinone or similar compound as acceptor,GO:0048037~cofactor binding,GO:0050136~NADH  
dehydrogenase (quinone) activity,GO:0050662~coenzyme binding, IPR001509:NAD-dependent epimerase/dehydratase,IPR016040:NAD(P)-binding domain,  
dme00190:Oxidative phosphorylation, complete proteome,oxidoreductase,

1636423\_at Dmel\_CG8012 Drosophila melanogaster complete proteome,  
1636591\_at Dmel\_CG8881 Drosophila melanogaster Posttranslational modification, protein turnover, chaperones,  
GO:0006508~proteolysis,GO:0006511~ubiquitin-dependent protein catabolic process,GO:0009057~macromolecule catabolic process,GO:0019941~modification-  
dependent protein catabolic process,GO:0030163~protein catabolic process,GO:0043632~modification-dependent macromolecule catabolic process,GO:0044257~cellular protein  
catabolic process,GO:0044265~cellular macromolecule catabolic process,GO:0051603~proteolysis involved in cellular protein catabolic process, IPR001232:SKP1  
component,IPR011333:BTB/POZ fold,IPR016072:SKP1 component, dimerisation,IPR016073:SKP1 component, POZ,IPR016897:E3 ubiquitin ligase, SCF complex, Skp subunit,  
dme04120:Ubiquitin mediated proteolysis,dme04310:Wnt signaling pathway,dme04350:TGF-beta signaling pathway, PIRSF028729:E3\_ubiquit\_lig\_SCF\_Skp,  
SM00512:Skp1, complete proteome,  
1638727\_at Dmel\_CG9821 Drosophila melanogaster complete proteome,  
1629839\_a\_at G protein gamma 1Drosophila melanogaster GO:0007010~cytoskeleton organization,GO:0007015~actin filament organization,GO:0007155~cell  
adhesion,GO:0007166~cell surface receptor linked signal transduction,GO:0007186~G-protein coupled receptor protein signaling pathway,GO:0007405~neuroblast  
proliferation,GO:0007507~heart development,GO:0007584~response to nutrient,GO:0007610~behavior,GO:0007635~chemosensory behavior,GO:0007637~proboscis extension  
reflex,GO:0008104~protein localization,GO:0008105~asymmetric protein localization,GO:0008283~cell proliferation,GO:0008360~regulation of cell shape,GO:0009991~response to  
extracellular stimulus,GO:0017145~stem cell division,GO:0022604~regulation of cell morphogenesis,GO:0022610~biological adhesion,GO:0030029~actin filament-based  
process,GO:0030036~actin cytoskeleton organization,GO:0031667~response to nutrient levels,GO:0035050~embryonic heart tube development,GO:0035295~tube

development,GO:0045165~cell fate commitment,GO:0045176~apical protein localization,GO:0048103~somatic stem cell division,GO:0051301~cell division,GO:0051780~behavioral response to nutrient,GO:0055057~neuroblast division,GO:0055059~asymmetric neuroblast division,GO:0060004~reflex, GO:0005834~heterotrimeric G-protein complex,GO:0005886~plasma membrane,GO:0009898~internal side of plasma membrane,GO:0019897~extrinsic to plasma membrane,GO:0019898~extrinsic to membrane,GO:0044459~plasma membrane part, GO:0003924~GTPase activity, IPR001770:G-protein, gamma subunit,IPR015898:G-protein, gamma-like subunit, PIRSF002398:GTP-binding regulatory protein gamma chain, SM00224:GGL, cell membrane,complete proteome,GTP binding,lipoprotein,membrane,methylated carboxyl end,methylation,prenylated cysteine,prenylation,transducer, chain:Guanine nucleotide-binding protein subunit gamma-1,lipid moiety-binding region:S-geranylgeranyl cysteine,modified residue,propeptide:Removed in mature form,

1624042\_at G protein-coupled receptor kinase 2 Drosophila melanogaster GO:0006468~protein amino acid phosphorylation,GO:0006793~phosphorus metabolic process,GO:0006796~phosphate metabolic process,GO:0007166~cell surface receptor linked signal transduction,GO:0007186~G-protein coupled receptor protein signaling pathway,GO:0007224~smoothed signaling pathway,GO:0007276~gamete generation,GO:0007292~female gamete generation,GO:0008277~regulation of G-protein coupled receptor protein signaling pathway,GO:0016310~phosphorylation,GO:0019953~sexual reproduction,GO:0032504~multicellular organism reproduction,GO:0048477~oogenesis,GO:0048609~reproductive process in a multicellular organism, GO:0005886~plasma membrane, GO:0000166~nucleotide binding,GO:0001882~nucleoside binding,GO:0001883~purine nucleoside binding,GO:0004672~protein kinase activity,GO:0004674~protein serine/threonine kinase activity,GO:0004703~G-protein coupled receptor kinase activity,GO:0005524~ATP binding,GO:0017076~purine nucleotide binding,GO:0030554~adenyl nucleotide binding,GO:0032553~ribonucleotide binding,GO:0032555~purine ribonucleotide binding,GO:0032559~adenyl ribonucleotide binding, IPR000239:GPCR kinase,IPR000342:Regulator of G protein signalling,IPR000719:Protein kinase, core,IPR000961:AGC-kinase, C-terminal,IPR002290:Serine/threonine protein kinase,IPR008271:Serine/threonine protein kinase, active site,IPR017441:Protein kinase, ATP binding site,IPR017442:Serine/threonine protein kinase-related, dme04144:Endocytosis, SM00133:S\_TK\_X,SM00220:S\_TKc,SM00315:RGS, ATP,atp-binding,complete proteome,developmental protein,differentiation,kinase,membrane,nucleotide-binding,oogenesis,phosphoprotein,phosphotransferase,repeat,serine/threonine-protein kinase,serine/threonine-specific protein kinase,transferase, active site:Proton acceptor,binding site:ATP,chain:G protein-coupled receptor kinase 2,compositionally biased region:Asn-rich,domain:AGC-kinase C-terminal,domain:Protein kinase,domain:RGS 1,domain:RGS 2,modified residue,nucleotide phosphate-binding region:ATP,region of interest:N-terminal,sequence conflict,

1634707\_s\_at    Glutamine:fructose-6-phosphate aminotransferase 1    Drosophila melanogaster    Cell envelope biogenesis, outer membrane,    GO:0016051~carbohydrate biosynthetic process,    GO:0004360~glutamine-fructose-6-phosphate transaminase (isomerizing) activity,GO:0005529~sugar binding,GO:0008483~transaminase activity,GO:0016769~transferase activity, transferring nitrogenous groups,GO:0030246~carbohydrate binding,    IPR000583:Glutamine amidotransferase, class-II,IPR001347:Sugar isomerase (SIS),IPR005855:Glucosamine-fructose-6-phosphate aminotransferase, isomerising,IPR017932:Glutamine amidotransferase, type II,    dme00250:Alanine, aspartate and glutamate metabolism,dme00520:Amino sugar and nucleotide sugar metabolism,    Aminotransferase,complete proteome,transferase,

1626566\_at    Probable medium-chain specific acyl-CoA dehydrogenase, mitochondrial    Drosophila melanogaster    Lipid metabolism,    GO:0006631~fatty acid metabolic process,GO:0006635~fatty acid beta-oxidation,GO:0009062~fatty acid catabolic process,GO:0016042~lipid catabolic process,GO:0016054~organic acid catabolic process,GO:0019395~fatty acid oxidation,GO:0030258~lipid modification,GO:0034440~lipid oxidation,GO:0044242~cellular lipid catabolic process,GO:0046395~carboxylic acid catabolic process,GO:0055114~oxidation reduction,    GO:0005739~mitochondrion,GO:0005759~mitochondrial matrix,GO:0005811~lipid particle,GO:0031974~membrane-enclosed lumen,GO:0031980~mitochondrial lumen,GO:0043233~organelle lumen,GO:0044429~mitochondrial part,GO:0070013~intracellular organelle lumen,    GO:0000166~nucleotide binding,GO:0001882~nucleoside binding,GO:0001883~purine nucleoside binding,GO:0003995~acyl-CoA dehydrogenase activity,GO:0009055~electron carrier activity,GO:0017076~purine nucleotide binding,GO:0030554~adenyl nucleotide binding ,GO:0048037~cofactor binding,GO:0050660~FAD binding,GO:0050662~coenzyme binding,    IPR006089:Acyl-CoA dehydrogenase, conserved site,IPR006090:Acyl-CoA oxidase/dehydrogenase, type 1,IPR006091:Acyl-CoA oxidase/dehydrogenase, central region,IPR006092:Acyl-CoA dehydrogenase, N-terminal,IPR013764:Acyl-CoA oxidase/dehydrogenase, type1/2, C-terminal,IPR013786:Acyl-CoA dehydrogenase/oxidase, N-terminal,    dme00071:Fatty acid metabolism,dme00280:Valine, leucine and isoleucine degradation,dme00410:beta-Alanine metabolism,dme00640:Propanoate metabolism,    PIRSF000182:acyl-CoA dehydrogenase,    complete proteome,FAD,fatty acid metabolism,Flavoprotein,lipid metabolism,mitochondrion,oxidoreductase,transit peptide,    active site:Proton acceptor,binding site:Substrate; via amide nitrogen,binding site:Substrate; via carbonyl oxygen,chain:Probable medium-chain specific acyl-CoA dehydrogenase, mitochondrial,nucleotide phosphate-binding region:FAD,region of interest:Substrate binding,transit peptide:Mitochondrion,

1638186\_a\_at Protein fem-1 homolog B Drosophila melanogaster GO:0006508~proteolysis,GO:0009057~macromolecule catabolic process,GO:0019941~modification-dependent protein catabolic process,GO:0030163~protein catabolic process,GO:0031396~regulation of protein ubiquitination,GO:0031399~regulation of protein modification process,GO:0032268~regulation of cellular protein metabolic process,GO:0043632~modification-dependent macromolecule catabolic process,GO:0044257~cellular protein catabolic process,GO:0044265~cellular macromolecule catabolic process,GO:0051340~regulation of ligase activity,GO:0051438~regulation of ubiquitin-protein ligase activity,GO:0051603~proteolysis involved in cellular protein catabolic process, GO:0004842~ubiquitin-protein ligase activity,GO:0016879~ligase activity, forming carbon-nitrogen bonds,GO:0016881~acid-amino acid ligase activity,GO:0019787~small conjugating protein ligase activity, IPR002110:Ankyrin, SM00248:ANK, alternative splicing,ank repeat,complete proteome,repeat,ubl conjugation pathway, chain:Protein fem-1 homolog B,repeat:ANK 1,repeat:ANK 2,repeat:ANK 3,repeat:ANK 4,repeat:ANK 5,repeat:ANK 6,repeat:ANK 7,splice variant,

1627376\_at Relish Drosophila melanogaster GO:0002684~positive regulation of immune system process,GO:0002697~regulation of immune effector process,GO:0002700~regulation of production of molecular mediator of immune response,GO:0002759~regulation of antimicrobial humoral response,GO:0002784~regulation of antimicrobial peptide production,GO:0002786~regulation of antibacterial peptide production,GO:0002788~regulation of antifungal peptide production,GO:0002805~regulation of antimicrobial peptide biosynthetic process,GO:0002807~positive regulation of antimicrobial peptide biosynthetic process,GO:0002808~regulation of antibacterial peptide biosynthetic process,GO:0002810~regulation of antifungal peptide biosynthetic process,GO:0002813~regulation of biosynthetic process of antibacterial peptides active against Gram-negative bacteria,GO:0002831~regulation of response to biotic stimulus,GO:0002920~regulation of humoral immune response,GO:0006350~transcription,GO:0006355~regulation of transcription, DNA-dependent,GO: 0006357~regulation of transcription from RNA polymerase II promoter,GO:0006952~defense response,GO:0006955~immune response,GO:0006959~humoral immune response,GO:0006963~positive regulation of antibacterial peptide biosynthetic process,GO:0006964~positive regulation of biosynthetic process of antibacterial peptides active against Gram-negative bacteria,GO:0006967~positive regulation of antifungal peptide biosynthetic process,GO:0007166~cell surface receptor linked signal transduction,GO:0008063~Toll signaling pathway,GO:0009267~cellular response to starvation,GO:0009617~response to bacterium,GO:0009891~positive regulation of biosynthetic process,GO:0009991~response to extracellular stimulus,GO:0010551~regulation of specific transcription from RNA polymerase II promoter,GO:0010552~positive regulation of specific transcription from RNA polymerase II promoter,GO:0010557~positive regulation of macromolecule biosynthetic process,GO:0010604~positive regulation of macromolecule metabolic process,GO:0010628~positive regulation of gene

expression,GO:0019730~antimicrobial humoral response,GO:0031328~positive regulation of cellular biosynthetic process,GO:0031349~positive regulation of defense response,GO:0031667~response to nutrient levels,GO:0031668~cellular response to extracellular stimulus,GO:0031669~cellular response to nutrient levels,GO:0032583~regulation of gene-specific transcription,GO:0033554~cellular response to stress,GO:0034198~cellular response to amino acid starvation,GO:0042594~response to starvation,GO:0042742~defense response to bacterium,GO:0043193~positive regulation of gene-specific transcription,GO:0043900~regulation of multi-organism process,GO:0045087~innate immune response,GO:0045088~regulation of innate immune response,GO:0045089~positive regulation of innate immune response,GO:0045428~regulation of nitric oxide biosynthetic process,GO:0045429~positive regulation of nitric oxide biosynthetic process,GO:0045449~regulation of transcription,GO:0045893~positive regulation of transcription, DNA-dependent,GO:0045935~positive regulation of nucleobase, nucleoside, nucleotide and nucleic acid metabolic process,GO:0045941~positive regulation of transcription,GO:0045944~positive regulation of transcription from RNA polymerase II promoter,GO:0048584~positive regulation of response to stimulus,GO:0050778~positive regulation of immune response,GO:0050829~defense response to Gram-negative bacterium,GO:0051173~positive regulation of nitrogen compound metabolic process,GO:0051252~regulation of RNA metabolic process,GO:0051254~positive regulation of RNA metabolic process, GO:0003677~DNA binding,GO:0003700~transcription factor activity,GO:0030528~transcription regulator activity, IPR000451:NF-kappa-B/Rel/dorsal,IPR002110:Ankyrin,IPR002909:Cell surface receptor IPT/TIG,IPR011539:Rel homology,IPR013783:Immunoglobulin-like fold, SM00248:ANK,SM00429:IPT,activator,alternative splicing,ank repeat,complete proteome,cytoplasm,direct protein sequencing,immune response,innate immunity,nucleus,phosphoprotein,repeat,Transcription,transcription regulation, chain:Nuclear factor NF-kappa-B p110 subunit,chain:Nuclear factor NF-kappa-B p49 subunit,chain:Nuclear factor NF-kappa-B p68 subunit,domain:RHD,modified residue,mutagenesis site,repeat:ANK 1,repeat:ANK 2,repeat:ANK 3,repeat:ANK 4,repeat:ANK 5,sequence conflict,sequence variant,short sequence motif:Nuclear localization signal,site:Cleavage (when cotranslationally processed),splice variant,

1629357\_s\_at SNF1A/AMP-activated protein kinase Drosophila melanogaster GO:0000278~mitotic cell cycle,GO:0000902~cell morphogenesis,GO:0006468~protein amino acid phosphorylation,GO:0006793~phosphorus metabolic process,GO:0006796~phosphate metabolic process,GO:0006897~endocytosis,GO:0006909~phagocytosis,GO:0006911~phagocytosis, engulfment,GO:0007049~cell cycle,GO:0007163~establishment or maintenance of cell polarity,GO:0010324~membrane invagination,GO:0016044~membrane organization,GO:0016192~vesicle-mediated transport,GO:0016310~phosphorylation,GO:0032989~cellular component morphogenesis,GO:0035088~establishment or maintenance of apical/basal cell polarity,GO:0045197~establishment or maintenance of epithelial cell apical/basal

polarity, GO:0031588~AMP-activated protein kinase complex, GO:0000166~nucleotide binding,GO:0001882~nucleoside binding,GO:0001883~purine nucleoside binding,GO:0004672~protein kinase activity,GO:0004674~protein serine/threonine kinase activity,GO:0004679~AMP-activated protein kinase activity,GO:0004703~G-protein coupled receptor kinase activity,GO:0005524~ATP binding,GO:0017076~purine nucleotide binding,GO:0030554~adenyl nucleotide binding,GO:0032553~ribonucleotide binding,GO:0032555~purine ribonucleotide binding,GO:0032559~adenyl ribonucleotide binding, IPR000719:Protein kinase, core,IPR002290:Serine/threonine protein kinase,IPR008271:Serine/threonine protein kinase, active site,IPR015741:Snf1-like protein AMPK,IPR017441:Protein kinase, ATP binding site,IPR017442:Serine/threonine protein kinase-related, dme04140:Regulation of autophagy,dme04150:mTOR signaling pathway, PIRSF000590:Snf1/AMPK-type protein kinases, catalytic subunits, SM00220:S\_TKc, atp-binding,complete proteome,kinase,nucleotide-binding,serine/threonine-protein kinase,transferase,

1625433\_at Sarcoplasmic calcium-binding protein 1 Drosophila melanogaster GO:0005783~endoplasmic reticulum,GO:0016528~sarcoplasm,GO:0016529~sarcoplasmic reticulum, GO:0005509~calcium ion binding,GO:0043167~ion binding,GO:0043169~cation binding,GO:0046872~metal ion binding, IPR002048:Calcium-binding EF-hand,IPR011992:EF-Hand type,IPR018247:EF-HAND 1,IPR018248:EF hand,IPR018249:EF-HAND 2, SM00054:EFh, calcium,

1638050\_s\_at Sox box protein 14 Drosophila melanogaster GO:0006350~transcription,GO:0045449~regulation of transcription, GO:0003677~DNA binding,GO:0003700~transcription factor activity,GO:0030528~transcription regulator activity, IPR000910:High mobility group, HMG1/HMG2, SM00398:HMG, complete proteome,DNA binding,dna-binding,nucleus,Transcription,transcription regulation, chain:Putative transcription factor SOX-14,compositionally biased region:Poly-Ala,compositionally biased region:Poly-Asn,DNA-binding region:HMG box,sequence conflict,

1639321\_s\_at Toll Drosophila melanogaster Function unknown,GO:0000578~embryonic axis specification,GO:0000910~cytokinesis,GO:0002520~immune system development,GO:0002697~regulation of immune effector process,GO:0002700~regulation of production of molecular mediator of immune response,GO:0002759~regulation of antimicrobial humoral response,GO:0002784~regulation of antimicrobial peptide production,GO:0002786~regulation of antibacterial peptide production,GO:0002788~regulation of antifungal peptide production,GO:0002805~regulation of antimicrobial peptide biosynthetic process,GO:0002807~positive regulation of antimicrobial peptide biosynthetic process,GO:0002808~regulation of antibacterial peptide biosynthetic process,GO:0002810~regulation of antifungal peptide biosynthetic process,GO:0002831~regulation of response to biotic stimulus,GO:0002920~regulation of humoral immune response,GO:0003002~regionalization,GO:0006952~defense response,GO:0006955~immune



response,GO:0006959~humoral immune response,GO:0006963~positive regulation of antibacterial peptide biosynthetic process,GO:0006967~positive regulation of antifungal peptide biosynthetic process,GO:0007155~cell adhesion,GO:0007166~cell surface receptor linked signal transduction,GO:0007352~zygotic determination of dorsal/ventral axis,GO:0007389~pattern specification process,GO:0007416~synaptogenesis,GO:0008063~Toll signaling pathway,GO:0008283~cell proliferation,GO:0009617~response to bacterium,GO:0009620~response to fungus,GO:0009798~axis specification,GO:0009880~embryonic pattern specification,GO:0009891~positive regulation of biosynthetic process,GO:0009950~dorsal/ventral axis specification,GO:0009953~dorsal/ventral pattern formation,GO:0019730~antimicrobial humoral response,GO:0019732~antifungal humoral response,GO:0022610~biological adhesion,GO:0030097~hemopoiesis,GO:0031328~positive regulation of cellular biosynthetic process,GO:0035007~regulation of melanization defense response,GO:0035172~hemocyte proliferation,GO:0042742~defense response to bacterium,GO:0043062~extracellular structure organization,GO:0043455~regulation of secondary metabolic process,GO:0043900~regulation of multi-organism process,GO:0045087~innate immune response,GO:0045088~regulation of innate immune response,GO:0045610~regulation of hemocyte differentiation,GO:0048534~hemopoietic or lymphoid organ development,GO:0050808~synapse organization,GO:0050830~defense response to Gram-positive bacterium,GO:0050832~defense response to fungus,GO:0051301~cell division,GO:0005886~plasma membrane,GO:0005887~integral to plasma membrane,GO:0016021~integral to membrane,GO:0031224~intrinsic to membrane,GO:0031226~intrinsic to plasma membrane,GO:0044459~plasma membrane part, GO:0019955~cytokine binding,GO:0042802~identical protein binding, IPR000157:Toll-Interleukin receptor,IPR000372:Leucine-rich repeat, cysteine-rich flanking region, N-terminal,IPR000483:Cysteine-rich flanking region, C-terminal,IPR001611:Leucine-rich repeat,IPR003591:Leucine-rich repeat, typical subtype,IPR004075:Interleukin-1 receptor, type I/Toll precursor, SM00013:LRRNT,SM00082:LRRCT,SM00255:TIR,SM00369:LRR\_TYP, cell adhesion,cell membrane,complete proteome,developmental protein,disulfide bond,glycoprotein,leucine-rich repeat,membrane,polymorphism,repeat,signal,transmembrane,transmembrane protein, chain:Protein toll,domain:TIR,glycosylation site:N-linked (GlcNAc...),repeat:LRR 1,repeat:LRR 10,repeat:LRR 11,repeat:LRR 12,repeat:LRR 13,repeat:LRR 14,repeat:LRR 15,repeat:LRR 16,repeat:LRR 17,repeat:LRR 18,repeat:LRR 19,repeat:LRR 2,repeat:LRR 20,repeat:LRR 21,repeat:LRR 3,repeat:LRR 4,repeat:LRR 5,repeat:LRR 6,repeat:LRR 7,repeat:LRR 8,repeat:LRR 9,sequence conflict,sequence variant,signal peptide,topological domain:Cytoplasmic,topological domain:Extracellular,transmembrane region,

1629843\_s\_at Ubiquitin carrier protein Drosophila melanogaster GO:0006508~proteolysis,GO:0009057~macromolecule catabolic process,GO:0016567~protein ubiquitination,GO:0019941~modification-dependent protein catabolic process,GO:0030163~protein catabolic process,GO:0032446~protein modification by small protein

conjugation,GO:0043632~modification-dependent macromolecule catabolic process,GO:0044257~cellular protein catabolic process,GO:0044265~cellular macromolecule catabolic process,GO:0051603~proteolysis involved in cellular protein catabolic process,GO:0070647~protein modification by small protein conjugation or removal,

GO:0004842~ubiquitin-protein ligase activity,GO:0016879~ligase activity, forming carbon-nitrogen bonds,GO:0016881~acid-amino acid ligase activity,GO:0019787~small conjugating protein ligase activity, IPR000608:Ubiquitin-conjugating enzyme, E2,IPR015581:Ubiquitin-conjugating enzyme,IPR016135:Ubiquitin-conjugating enzyme/RWD-like, dme04120:Ubiquitin mediated proteolysis, SM00212:UBCc, complete proteome,ligase,ubl conjugation pathway,

1640754\_at brummerDrosophila melanogaster GO:0006638~neutral lipid metabolic process,GO:0006639~acylglycerol metabolic process,GO:0006641~triglyceride metabolic process,GO:0006642~triglyceride mobilization,GO:0006662~glycerol ether metabolic process,GO:0007568~aging,GO:0008340~determination of adult life span,GO:0010259~multicellular organismal aging,GO:0016042~lipid catabolic process,GO:0018904~organic ether metabolic process,GO:0019433~triglyceride catabolic process,GO:0044242~cellular lipid catabolic process,GO:0044269~glycerol ether catabolic process,GO:0046461~neutral lipid catabolic process,GO:0046464~acylglycerol catabolic process,GO:0046486~glycerolipid metabolic process,GO:0046503~glycerolipid catabolic process,GO:0005811~lipid particle, GO:0004091~carboxylesterase activity,GO:0004806~triacylglycerol lipase activity,GO:0016298~lipase activity, IPR002641:Patatin, complete proteome,hydrolase,lipid degradation,

1635619\_a\_at centrosomin Drosophila melanogaster GO:0000087~M phase of mitotic cell cycle,GO:0000226~microtubule cytoskeleton organization,GO:0000278~mitotic cell cycle,GO:0000279~M phase,GO:0000280~nuclear division,GO:0007010~cytoskeleton organization,GO:0007017~microtubule-based process,GO:0007049~cell cycle,GO:0007051~spindle organization,GO:0007052~mitotic spindle organization,GO:0007059~chromosome segregation,GO:0007067~mitosis,GO:0007098~centrosome cycle,GO:0007126~meiosis,GO:0007143~female meiosis,GO:0007422~peripheral nervous system development,GO:0007494~midgut development,GO:0016321~female meiosis chromosome segregation,GO:0022402~cell cycle process,GO:0022403~cell cycle phase,GO:0031023~microtubule organizing center organization,GO:0045132~meiotic chromosome segregation,GO:0048285~organelle fission,GO:0048565~gut development,GO:0051297~centrosome organization,GO:0051301~cell division,GO:0051321~meiotic cell cycle,GO:0051327~M phase of meiotic cell cycle, GO:0000242~pericentriolar material,GO:0005813~centrosome,GO:0005815~microtubule organizing center,GO:0005856~cytoskeleton,GO:0005875~microtubule associated complex,GO:0005929~cilium,GO:0005932~microtubule basal body,GO:0015629~actin cytoskeleton,GO:0015630~microtubule cytoskeleton,GO:0016459~myosin

complex,GO:0019861~flagellum,GO:0042995~cell projection,GO:0043228~non-membrane-bounded organelle,GO:0043232~intracellular non-membrane-bounded organelle,GO:0044430~cytoskeletal part,GO:0044450~microtubule organizing center part,GO:0044463~cell projection part, GO:0008017~microtubule binding,GO:0008092~cytoskeletal protein binding,GO:0015631~tubulin binding,GO:0016887~ATPase activity,GO:0042624~ATPase activity, uncoupled, IPR012943:Spindle associated, alternative splicing,cell cycle,cell division,cell projection,cilium,coiled coil,complete proteome,cytoplasm,cytoskeleton,developmental protein,flagellum,hydrolase,leucine zipper,meiosis,mitosis,phosphoprotein, chain:Centrosomin,modified residue,sequence conflict,short sequence motif:Nuclear localization signal,splice variant,

1631243\_s\_at lethal (3) 05822 Drosophila melanogaster IPR000108:Neutrophil cytosol factor 2,IPR001452:Src homology-3 domain, SM00326:SH3, complete proteome,sh3 domain,

1627651\_a\_at locomotion defectsDrosophila melanogaster GO:0000902~cell morphogenesis,GO:0001885~endothelial cell development,GO:0002009~morphogenesis of an epithelium,GO:0002064~epithelial cell development,GO:0003002~regionalization,GO:0003006~reproductive developmental process,GO:0007010~cytoskeleton organization,GO:0007043~cell-cell junction assembly,GO:0007163~establishment or maintenance of cell polarity,GO:0007276~gamete generation,GO:0007292~female gamete generation,GO:0007300~ovarian nurse cell to oocyte transport,GO:0007303~cytoplasmic transport, nurse cell to oocyte,GO:0007389~pattern specification process,GO:0007405~neuroblast proliferation,GO:0007419~ventral cord development,GO:0008069~dorsal/ventral axis specification, ovarian follicular epithelium,GO:0008104~protein localization,GO:0008105~asymmetric protein localization,GO:0008277~regulation of G-protein coupled receptor protein signaling pathway,GO:0008283~cell proliferation,GO:0009798~axis specification,GO:0009950~dorsal/ventral axis specification,GO:0009953~dorsal/ventral pattern formation,GO:0010001~glial cell differentiation,GO:0014045~establishment of endothelial blood-brain barrier,GO:0016333~morphogenesis of follicular epithelium,GO:0016334~establishment or maintenance of polarity of follicular epithelium,GO:0016482~cytoplasmic transport,GO:0017145~stem cell division,GO:0019953~sexual reproduction,GO:0019991~septate junction assembly,GO:0021782~glial cell development,GO:0030029~actin filament-based process,GO:0030036~actin cytoskeleton organization,GO:0030707~ovarian follicle cell development,GO:0030855~epithelial cell differentiation,GO:0030865~cortical cytoskeleton organization,GO:0030866~cortical actin cytoskeleton organization,GO:0032504~multicellular organism reproduction,GO:0032989~cellular component morphogenesis,GO:0034329~cell junction assembly,GO:0034330~cell junction organization,GO:0042063~gliogenesis,GO:0043297~apical junction assembly,GO:0045165~cell fate commitment,GO:0045216~cell-cell junction

organization,GO:0045446~endot helial cell differentiation,GO:0046907~intracellular transport,GO:0048103~somatic stem cell  
 division,GO:0048477~oogenesis,GO:0048609~reproductive process in a multicellular organism,GO:0048610~reproductive cellular process,GO:0048729~tissue  
 morphogenesis,GO:0051301~cell division,GO:0055057~neuroblast division,GO:0055059~asymmetric neuroblast division,GO:0060429~epithelium development,  
 GO:0005886~plasma membrane,GO:0005938~cell cortex,GO:0044448~cell cortex part,GO:0045177~apical part of cell,GO:0045179~apical cortex, GO:0001965~G-  
 protein alpha-subunit binding,GO:0005096~GTPase activator activity,GO:0008047~enzyme activator activity,GO:0030695~GTPase regulator activity,GO:0060589~nucleoside-  
 triphosphatase regulator activity, IPR000342:Regulator of G protein signalling,IPR001478:PDZ/DHR/GLGF,IPR003109:GoLoco motif,IPR003116:Raf-like Ras-  
 binding,IPR006020:Phosphotyrosine interaction region, SM00228:PDZ,SM00315:RGS,SM00390:GoLoco,SM00455:RBD,SM00462:PTB,complete proteome,  
 1625830\_a\_at scruiin like at the midline Drosophila melanogaster IPR006652:Kelch repeat type 1,IPR015915:Kelch-type beta propeller,  
 SM00612:Kelch, complete proteome,

\*\*\*\*\*

+D  
C  
-D

Probe sets:

1625199\_s\_at            1633654\_s\_at            1634814\_at            1638325\_at            1638875\_at

Functional annotation table:

-D C +D

| ID         | Gene Name                        | Species                 | GOTERM_BP_FAT                                                                                                                                                                                                                                                                                                                                                                                                                                                                                                                                                                                                                                                                                                                                                                                                                                                                                                                                                                                                                                                                                                                                                                                                                                                                                                                                                                                                                                                                                                                                                                                                                                                                                                                                                                                                                                                                                                                                                                                                                                                                          | GOTERM_CC_FAT | GOTERM_MF_FAT | INTERPRO | KEGG_PATHWAY | PIR_SUPERFAMILY | SP_PIR_KEYWORDS                                                                                                                  | UP_SEQ_FEATURE                                                                    |  |
|------------|----------------------------------|-------------------------|----------------------------------------------------------------------------------------------------------------------------------------------------------------------------------------------------------------------------------------------------------------------------------------------------------------------------------------------------------------------------------------------------------------------------------------------------------------------------------------------------------------------------------------------------------------------------------------------------------------------------------------------------------------------------------------------------------------------------------------------------------------------------------------------------------------------------------------------------------------------------------------------------------------------------------------------------------------------------------------------------------------------------------------------------------------------------------------------------------------------------------------------------------------------------------------------------------------------------------------------------------------------------------------------------------------------------------------------------------------------------------------------------------------------------------------------------------------------------------------------------------------------------------------------------------------------------------------------------------------------------------------------------------------------------------------------------------------------------------------------------------------------------------------------------------------------------------------------------------------------------------------------------------------------------------------------------------------------------------------------------------------------------------------------------------------------------------------|---------------|---------------|----------|--------------|-----------------|----------------------------------------------------------------------------------------------------------------------------------|-----------------------------------------------------------------------------------|--|
| 1638875_at | Egg-derived tyrosine phosphatase | Drosophila melanogaster | GO:0006470~protein amino acid dephosphorylation,GO:0006793~phosphorus metabolic process,GO:0006796~phosphate metabolic process,GO:0016311~dephosphorylation,                                                                                                                                                                                                                                                                                                                                                                                                                                                                                                                                                                                                                                                                                                                                                                                                                                                                                                                                                                                                                                                                                                                                                                                                                                                                                                                                                                                                                                                                                                                                                                                                                                                                                                                                                                                                                                                                                                                           |               |               |          |              |                 | GO:0004721~phosphoprotein phosphatase activity,GO:0004725~protein tyrosine phosphatase activity,GO:0016791~phosphatase activity, | IPR016130:Protein-tyrosine phosphatase, active site, complete proteome,hydrolase, |  |
| 1638325_at | Henna                            | Drosophila melanogaster | GO:0006558~L-phenylalanine metabolic process,GO:0006559~L-phenylalanine catabolic process,GO:0006575~cellular amino acid derivative metabolic process,GO:0006576~biogenic amine metabolic process,GO:0006586~indolalkylamine metabolic process,GO:0006726~eye pigment biosynthetic process,GO:0006897~endocytosis,GO:0006909~phagocytosis,GO:0006911~phagocytosis, engulfment,GO:0009063~cellular amino acid catabolic process,GO:0009072~aromatic amino acid family metabolic process,GO:0009074~aromatic amino acid family catabolic process,GO:0009309~amine biosynthetic process,GO:0009310~amine catabolic process,GO:0010324~membrane invagination,GO:0016044~membrane organization,GO:0016054~organic acid catabolic process,GO:0016192~vesicle-mediated transport,GO:0018130~heterocycle biosynthetic process,GO:0019439~aromatic compound catabolic process,GO:0042398~cellular amino acid derivative biosynthetic process,GO:0042401~biogenic amine biosynthetic process,GO:0042427~serotonin biosynthetic process,GO:0042428~serotonin metabolic process,GO:0042430~indole and derivative metabolic process,GO:0042434~indole derivative metabolic process,GO:0042435~indole derivative biosynthetic process,GO:0042440~pigment metabolic process,GO:0042441~eye pigment metabolic process,GO:0043473~pigmentation,GO:0044271~nitrogen compound biosynthetic process,GO:0046148~pigment biosynthetic process,GO:0046219~indolalkylamine biosynthetic process,GO:0046395~carboxylic acid catabolic process,GO:0048066~pigmentation during development,GO:0048069~eye pigmentation,GO:0055114~oxidation reduction,GO:0005811~lipid particle, GO:0004505~phenylalanine 4-monooxygenase activity,GO:0004510~tryptophan 5-monooxygenase activity,GO:0005506~iron ion binding,GO:0016597~amino acid binding,GO:0016714~oxidoreductase activity, acting on paired donors, with incorporation or reduction of molecular oxygen, reduced pteridine as one donor, and incorporation of one atom of oxygen,GO:0031406~carboxylic acid binding,GO:0043167~ion binding,GO:0043169~cation |               |               |          |              |                 |                                                                                                                                  |                                                                                   |  |

binding,GO:0043176~amine binding,GO:0046872~metal ion binding,GO:0046914~transition metal ion binding, IPR001273:Aromatic amino acid hydroxylase,IPR002912:Amino acid-binding ACT,IPR005961:Phenylalanine-4-hydroxylase, tetrameric form,IPR018301:Aromatic amino acid hydroxylase, iron/copper binding site,IPR019773:Tyrosine 3-monooxygenase-like,IPR019774:Aromatic amino acid hydroxylase, C-terminal, dme00360:Phenylalanine metabolism,dme00400:Phenylalanine, tyrosine and tryptophan biosynthesis, PIRSF000336:TH,PIRSF000336:tyrosine 3-monooxygenase, allosteric enzyme,bipterin,complete proteome,iron,metal-binding,metalloprotein,Monooxygenase,oxidoreductase,phenylalanine catabolism,phenylketonuria,phosphoprotein,serotonin biosynthesis, chain:Protein henna,domain:ACT,metal ion-binding site:Iron,modified residue,sequence conflict,

1633654\_s\_at Inositol 1,4,5-triphosphate kinase 2 Drosophila melanogaster GO:0006020~inositol metabolic process,GO:0006793~phosphorus metabolic process,GO:0006796~phosphate metabolic process,GO:0016310~phosphorylation,GO:0019751~polyol metabolic process,GO:0046835~carbohydrate phosphorylation,GO:0046853~inositol and derivative phosphorylation, GO:0004428~inositol or phosphatidylinositol kinase activity,GO:0005516~calmodulin binding,GO:0008440~inositol trisphosphate 3-kinase activity,GO:0048306~calcium-dependent protein binding,GO:0051766~inositol trisphosphate kinase activity, IPR005522:Inositol polyphosphate kinase, dme00562:Inositol phosphate metabolism,dme04070:Phosphatidylinositol signaling system, complete proteome,kinase,transferase,

1634814\_at UPF0183 protein CG7083 Drosophila melanogaster IPR005373:Uncharacterised protein family UPF0183, PIRSF015809:hypothetical protein, Caenorhabditis elegans T01G9.2b type, complete proteome, chain:UPF0183 protein CG7083,

1625199\_s\_at dacapo Drosophila melanogaster GO:0000079~regulation of cyclin-dependent protein kinase activity,GO:0000082~G1/S transition of mitotic cell cycle,GO:0000278~mitotic cell cycle,GO:0001709~cell fate determination,GO:0002165~instar larval or pupal development,GO:0003006~reproductive developmental process,GO:0007049~cell cycle,GO:0007050~cell cycle arrest,GO:0007090~regulation of S phase of mitotic cell cycle,GO:0007276~gamete generation,GO:0007292~female gamete generation,GO:0007293~germarium-derived egg chamber formation,GO:0007294~germarium-derived oocyte fate determination,GO:0007346~regulation of mitotic cell cycle,GO:0007423~sensory organ development,GO:0007424~open tracheal system development,GO:0007444~imaginal disc development,GO:0007488~histoblast morphogenesis,GO:0007552~metamorphosis,GO:0007560~imaginal disc morphogenesis,GO:0008356~asymmetric cell division,GO:0009791~post-embryonic development,GO:0009886~post-embryonic morphogenesis,GO:0009994~oocyte differentiation,GO:0010563~negative r egulation of phosphorus metabolic

process,GO:0010564~regulation of cell cycle process,GO:0010605~negative regulation of macromolecule metabolic process,GO:0010948~negative regulation of cell cycle process,GO:0019220~regulation of phosphate metabolic process,GO:0019953~sexual reproduction,GO:0022402~cell cycle process,GO:0022403~cell cycle phase,GO:0030706~germarium-derived oocyte differentiation,GO:0030716~oocyte fate determination,GO:0031399~regulation of protein modification process,GO:0031400~negative regulation of protein modification process,GO:0032268~regulation of cellular protein metabolic process,GO:0032269~negative regulation of cellular protein metabolic process,GO:0032504~multicellular organism reproduction,GO:0033261~regulation of S phase,GO:0035303~regulation of dephosphorylation,GO:0035304~regulation of protein amino acid dephosphorylation,GO:0035305~negative regulation of dephosphorylation,GO:0035308~negative regulation of protein amino acid dephosphorylation,GO:0042325~regulation of phosphorylation,GO:0043549~regulation of kinase activity,GO:0045035~sensory organ precursor cell division,GO:0045165~cell fate commitment,GO:0045749~negative regulation of S phase of mitotic cell cycle,GO:0045786~negative regulation of cell cycle,GO:0045859~regulation of protein kinase activity,GO:0045930~negative regulation of mitotic cell cycle,GO:0045936~negative regulation of phosphate metabolic process,GO:0048477~oogenesis,GO:0048563~post-embryonic organ morphogenesis,GO:0048569~post-embryonic organ development,GO:0048609~reproductive process in a multicellular organism,GO:0048610~reproductive cellular process,GO:0048707~instar larval or pupal morphogenesis,GO:0051174~regulation of phosphorus metabolic process,GO:0051248~negative regulation of protein metabolic process,GO:0051301~cell division,GO:0051318~G1 phase,GO:0051325~interphase,GO:0051329~interphase of mitotic cell cycle,GO:0051338~regulation of transferase activity,GO:0051726~regulation of cell cycle,GO:0060541~respiratory system development, GO:0004857~enzyme inhibitor activity,GO:0004860~protein kinase inhibitor activity,GO:0004861~cyclin-dependent protein kinase inhibitor activity,GO:0016538~cyclin-dependent protein kinase regulator activity,GO:0019207~kinase regulator activity,GO:0019210~kinase inhibitor activity,GO:0019887~protein kinase regulator activity,GO:0030291~protein serine/threonine kinase inhibitor activity, IPR003175:Cyclin-dependent kinase inhibitor,

\*\*\*\*\*

-D  
C  
+D





1628194\_at Dmel\_CG2918 Drosophila melanogaster GO:0006457~protein folding, GO:0005811~lipid particle, GO:0000166~nucleotide binding,GO:0001882~nucleoside binding,GO:0001883~purine nucleoside binding,GO:0005524~ATP binding,GO:0017076~purine nucleotide binding,GO:0030554~adenyl nucleotide binding,GO:0032553~ribonucleotide binding,GO:0032555~purine ribonucleotide binding,GO:0032559~adenyl ribonucleotide binding, IPR001023:Heat shock protein Hsp70,IPR013126:Heat shock protein 70,IPR018181:Heat shock protein 70, conserved site, atp-binding,complete proteome,nucleotide-binding,

1639762\_at Dmel\_CG3734 Drosophila melanogaster GO:0006508~proteolysis, GO:0008233~peptidase activity,GO:0008236~serine-type peptidase activity,GO:0017171~serine hydrolase activity,GO:0070011~peptidase activity, acting on L-amino acid peptides, IPR008758:Peptidase S28, PIRSF016539:Lysosomal Pro-X carboxypeptidase / Dipeptidyl-peptidase 2, complete proteome,

1632834\_a\_at Dmel\_CG5946 Drosophila melanogaster GO:0006897~endocytosis,GO:0006909~phagocytosis,GO:0006911~phagocytosis, engulfment,GO:0010324~membrane invagination,GO:0016044~membrane organization,GO:0016192~vesicle-mediated transport,GO:0055114~oxidation reduction, GO:0004128~cytochrome-b5 reductase activity,GO:0009055~electron carrier activity,GO:0016651~oxidoreductase activity, acting on NADH or NADPH,GO:0016653~oxidoreductase activity, acting on NADH or NADPH, heme protein as acceptor, IPR001433:Oxidoreductase FAD/NAD(P)-binding,IPR001709:Flavoprotein pyridine nucleotide cytochrome reductase,IPR001834:NADH:cytochrome b5 reductase (CBR),IPR008333:Oxidoreductase FAD-binding region,IPR017927:Ferredoxin reductase-type FAD-binding domain, dme00520:Amino sugar and nucleotide sugar metabolism, PIRSF000206:cytochrome-b5 reductase, complete proteome,FAD,Flavoprotein,nad,oxidoreductase,

1625519\_at Dmel\_CG6453 Drosophila melanogaster GO:0005783~endoplasmic reticulum,GO:0017177~alpha-glucosidase II complex,GO:0044432~endoplasmic reticulum part, GO:0004558~alpha-glucosidase activity,GO:0015926~glucosidase activity, IPR002172:Low density lipoprotein-receptor, class A, cysteine-rich,IPR012913:Glucosidase II beta subunit-like,IPR018247:EF-HAND 1, PIRSF017177:uncharacterized conserved protein, SM00192:LDLa, complete proteome,glycosidase,hydrolase,

1635065\_at Dmel\_CG7025 Drosophila melanogaster GO:0006508~proteolysis, GO:0004180~carboxypeptidase activity,GO:0004181~metallocarboxypeptidase activity,GO:0008233~peptidase activity,GO:0008235~metalloexopeptidase activity,GO:0008237~metallopeptidase activity,GO:0008238~exopeptidase activity,GO:0008270~zinc ion

binding,GO:0043167~ion binding,GO:0043169~cation binding,GO:0046872~metal ion binding,GO:0046914~transition metal ion binding,GO:0070011~peptidase activity, acting on L-  
 amino acid peptides, IPR000834:Peptidase M14, carboxypeptidase A, SM00631:Zn\_pept, carboxypeptidase,complete proteome,hydrolase,  
 1628429\_at Protein transport protein Sec61 gamma-2 subunit Drosophila melanogaster GO:0006605~protein targeting,GO:0006612~protein targeting to  
 membrane,GO:0006613~cotranslational protein targeting to membrane,GO:0006614~SRP-dependent cotranslational protein targeting to membrane,GO:0006616~SRP-dependent  
 cotranslational protein targeting to membrane, translocation,GO:0006886~intracellular protein transport,GO:0007033~vacuole organization,GO:0007040~lysosome  
 organization,GO:0008104~protein localization,GO:0009894~regulation of catabolic process,GO:0009895~negative regulation of catabolic process,GO:0010506~regulation of  
 autophagy,GO:0010507~negative regulation of autophagy,GO:0015031~protein transport,GO:0031329~regulation of cellular catabolic process,GO:0031330~negative regulation of  
 cellular catabolic process,GO:0033365~protein localization in organelle,GO:0034613~cellular protein localization,GO:0045047~protein targeting to ER,GO:0045184~establishment of  
 protein localization,GO:0046907~intracellular transport,GO:0055085~transmembrane transport,GO:0065002~intracellular protein transmembrane  
 transport,GO:0070727~cellular macromolecule localization, GO:0005783~endoplasmic reticulum,GO:0005784~translocon complex,GO:0005789~endoplasmic reticulum  
 membrane,GO:0005791~rough endoplasmic reticulum,GO:0012505~endomembrane system,GO:0016021~integral to membrane,GO:0030176~integral to endoplasmic reticulum  
 membrane,GO:0030867~rough endoplasmic reticulum membrane,GO:0031090~organelle membrane,GO:0031224~intrinsic to membrane,GO:0031227~intrinsic to endoplasmic  
 reticulum membrane,GO:0031300~intrinsic to organelle membrane,GO:0031301~integral to organelle membrane,GO:0042175~nuclear envelope-endoplasmic reticulum  
 network,GO:0044432~endoplasmic reticulum part, GO:0008320~protein transmembrane transporter activity,GO:0008565~protein transporter activity,GO:0015399~primary  
 active transmembrane transporter activity,GO:0015405~P-P-bond-hydrolysis-driven transmembrane transporter activity,GO:0015450~P-P-bond-hydrolysis-driven prot  
 ein transmembrane transporter activity,GO:0022884~macromolecule transmembrane transporter activity, IPR001901:Protein secE/sec61-gamma  
 protein,IPR008158:Protein translocase SEC61 complex gamma subunit, PIRSF005525:preprotein translocase Sec, SecE/Sec61-gamma  
 subunit,PIRSF500209:preprotein translocase Sec, Sec61-gamma subunit, complete proteome,endoplasmic reticulum,membrane,protein  
 transport,translocation,transmembrane,transport, chain:Protein transport protein Sec61 gamma-2 subunit,topological domain:Cytoplasmic,topological  
 domain:Extracellular,transmembrane region,

1636639\_at      Signal peptide protease      Drosophila melanogaster      GO:0006508~proteolysis,GO:0007424~open tracheal system development,GO:0009057~macromolecule catabolic process,GO:0030163~protein catabolic process,GO:0033619~membrane protein proteolysis,GO:0044257~cellular protein catabolic process,GO:0044265~cellular macromolecule catabolic process,GO:0051603~proteolysis involved in cellular protein catabolic process,GO:0060541~respiratory system development, GO:0005783~endoplasmic reticulum,GO:0016021~integral to membrane,GO:0031224~intrinsic to membrane,      GO:0004175~endopeptidase activity,GO:0004190~aspartic-type endopeptidase activity,GO:0008233~peptidase activity,GO:0042500~aspartic endopeptidase activity, intramembrane cleaving,GO:0070001~aspartic-type peptidase activity,GO:0070011~peptidase activity, acting on L-amino acid peptides,      IPR006639:Peptidase A22, presenilin signal peptide,IPR007369:Peptidase A22B, signal peptide peptidase,      SM00730:PSN,      complete proteome,hydrolase,Protease,

**File S3**

**Functional annotations for the probe sets classified in Figure 8**

Functional terms enriching the lists of probe sets in each expression pattern, obtained with the DAVID *Functional annotation chart* tool

\*\*\*\*\*

C

+D

-D

Functional annotation chart:

| Sublist | Category Term   | RT                                                  | Genes | Count | %    | P-Value | FDR     |
|---------|-----------------|-----------------------------------------------------|-------|-------|------|---------|---------|
|         | SP_PIR_KEYWORDS | alternative splicing                                | RT    | 167   | 11.5 | 1.4E-31 | 1.9E-28 |
|         | GOTERM_BP_FAT   | generation of precursor metabolites and energy      | RT    | 85    | 5.8  | 5.4E-27 | 9.5E-24 |
|         | GOTERM_BP_FAT   | energy derivation by oxidation of organic compounds | RT    | 58    | 4.0  | 2.4E-25 | 4.3E-22 |
|         | UP_SEQ_FEATURE  | splice variant                                      | RT    | 165   | 11.3 | 5.1E-25 | 8.3E-22 |
|         | GOTERM_BP_FAT   | cellular respiration                                | RT    | 54    | 3.7  | 6.9E-24 | 1.2E-20 |
|         | GOTERM_CC_FAT   | respiratory chain                                   | RT    | 46    | 3.2  | 3.6E-19 | 5.1E-16 |
|         | GOTERM_BP_FAT   | electron transport chain                            | RT    | 44    | 3.0  | 1.9E-18 | 3.3E-15 |
|         | GOTERM_BP_FAT   | phosphorus metabolic process                        | RT    | 131   | 9.0  | 2.7E-18 | 4.7E-15 |

|                 |                                                        |    |     |      |         |         |         |         |
|-----------------|--------------------------------------------------------|----|-----|------|---------|---------|---------|---------|
| GOTERM_BP_FAT   | phosphate metabolic process                            | RT | 131 | 9.0  | 2.7E-18 | 4.7E-15 |         |         |
| GOTERM_CC_FAT   | mitochondrial respiratory chain                        | RT | 44  | 3.0  | 3.7E-18 | 5.2E-15 |         |         |
| GOTERM_BP_FAT   | respiratory electron transport chain                   | RT | 39  | 2.7  | 8.3E-18 | 1.5E-14 |         |         |
| GOTERM_BP_FAT   | phosphorylation                                        | RT | 109 | 7.5  | 9.8E-18 | 1.7E-14 |         |         |
| KEGG_PATHWAY    | Oxidative phosphorylation                              | RT | 58  | 4.0  | 5.2E-17 | 5.7E-14 |         |         |
| GOTERM_BP_FAT   | mitochondrial ATP synthesis coupled electron transport | RT |     |      | 36      | 2.5     | 8.3E-17 | 1.9E-13 |
| GOTERM_BP_FAT   | oxidative phosphorylation                              | RT | 52  | 3.6  | 9.2E-17 | 1.9E-13 |         |         |
| GOTERM_BP_FAT   | ATP synthesis coupled electron transport               | RT |     |      | 37      | 2.5     | 1.0E-16 | 1.9E-13 |
| GOTERM_CC_FAT   | mitochondrial membrane part                            | RT | 55  | 3.8  | 6.0E-16 | 7.9E-13 |         |         |
| GOTERM_CC_FAT   | mitochondrial inner membrane                           | RT | 68  | 4.7  | 1.0E-14 | 1.4E-11 |         |         |
| GOTERM_CC_FAT   | mitochondrion                                          | RT | 137 | 9.4  | 1.2E-14 | 1.7E-11 |         |         |
| GOTERM_CC_FAT   | organelle inner membrane                               | RT | 70  | 4.8  | 7.6E-14 | 1.1E-10 |         |         |
| GOTERM_BP_FAT   | mitochondrial electron transport, NADH to ubiquinone   | RT |     |      | 22      | 1.5     | 1.7E-12 | 3.0E-9  |
| GOTERM_CC_FAT   | mitochondrial membrane                                 | RT | 72  | 4.9  | 2.2E-12 | 3.1E-9  |         |         |
| GOTERM_CC_FAT   | mitochondrial envelope                                 | RT | 75  | 5.2  | 3.1E-12 | 4.5E-9  |         |         |
| GOTERM_CC_FAT   | mitochondrial part                                     | RT | 103 | 7.1  | 3.7E-12 | 5.2E-9  |         |         |
| GOTERM_MF_FAT   | cytoskeletal protein binding                           | RT | 64  | 4.4  | 1.3E-11 | 2.0E-8  |         |         |
| GOTERM_BP_FAT   | epithelium development                                 | RT | 63  | 4.3  | 3.2E-11 | 5.6E-8  |         |         |
| SP_PIR_KEYWORDS | phosphoprotein                                         | RT | 148 | 10.2 | 4.2E-11 | 5.7E-8  |         |         |
| GOTERM_CC_FAT   | mitochondrial respiratory chain complex I              | RT |     |      | 25      | 1.7     | 4.1E-11 | 5.9E-8  |
| GOTERM_CC_FAT   | NADH dehydrogenase complex                             | RT | 25  | 1.7  | 4.1E-11 | 5.9E-8  |         |         |

|               |                                                  |    |    |     |         |         |         |        |        |
|---------------|--------------------------------------------------|----|----|-----|---------|---------|---------|--------|--------|
| GOTERM_CC_FAT | respiratory chain complex I                      | RT | 25 | 1.7 | 4.1E-11 | 5.9E-8  |         |        |        |
| GOTERM_MF_FAT | NADH dehydrogenase activity                      | RT |    | 24  | 1.6     | 5.8E-11 | 9.2E-8  |        |        |
| GOTERM_BP_FAT | cellular component morphogenesis                 | RT |    | 106 | 7.3     | 2.5E-10 | 4.3E-7  |        |        |
| GOTERM_CC_FAT | organelle envelope                               | RT | 86 | 5.9 | 4.0E-10 | 5.6E-7  |         |        |        |
| GOTERM_CC_FAT | envelope                                         | RT | 86 | 5.9 | 4.6E-10 | 6.6E-7  |         |        |        |
| GOTERM_BP_FAT | cell morphogenesis                               | RT | 94 | 6.5 | 3.8E-10 | 6.7E-7  |         |        |        |
| GOTERM_BP_FAT | establishment or maintenance of cell polarity    | RT |    |     | 37      | 2.5     | 7.0E-10 | 1.2E-6 |        |
| GOTERM_BP_FAT | transmission of nerve impulse                    | RT |    | 53  | 3.6     | 1.1E-9  | 1.9E-6  |        |        |
| GOTERM_BP_FAT | morphogenesis of an epithelium                   | RT |    | 58  | 4.0     | 1.1E-9  | 1.9E-6  |        |        |
| GOTERM_BP_FAT | actin cytoskeleton organization                  | RT |    | 43  | 3.0     | 1.6E-9  | 2.8E-6  |        |        |
| INTERPRO      | PDZ/DHR/GLGF                                     | RT | 28 | 1.9 | 1.7E-9  | 2.9E-6  |         |        |        |
| GOTERM_MF_FAT | oxidoreductase activity, acting on NADH or NADPH | RT |    |     |         | 25      | 1.7     | 1.9E-9 | 3.0E-6 |
| GOTERM_BP_FAT | actin filament-based process                     | RT |    | 43  | 3.0     | 2.0E-9  | 3.6E-6  |        |        |
| GOTERM_BP_FAT | morphogenesis of embryonic epithelium            | RT |    |     | 38      | 2.6     | 3.5E-9  | 6.2E-6 |        |
| GOTERM_CC_FAT | lipid particle                                   | RT | 66 | 4.5 | 5.6E-9  | 8.0E-6  |         |        |        |
| INTERPRO      | Src homology-3 domain                            | RT | 29 | 2.0 | 5.2E-9  | 8.7E-6  |         |        |        |
| GOTERM_BP_FAT | post-embryonic morphogenesis                     | RT |    | 77  | 5.3     | 6.0E-9  | 1.1E-5  |        |        |
| GOTERM_BP_FAT | tissue morphogenesis                             | RT | 60 | 4.1 | 6.3E-9  | 1.1E-5  |         |        |        |
| GOTERM_BP_FAT | metamorphosis                                    | RT | 78 | 5.4 | 8.4E-9  | 1.5E-5  |         |        |        |
| GOTERM_CC_FAT | septate junction                                 | RT | 15 | 1.0 | 1.5E-8  | 2.1E-5  |         |        |        |
| GOTERM_BP_FAT | instar larval or pupal morphogenesis             | RT |    | 75  | 5.2     | 1.5E-8  | 2.6E-5  |        |        |

|                 |                                                                                           |    |    |     |        |        |        |        |  |  |  |  |  |
|-----------------|-------------------------------------------------------------------------------------------|----|----|-----|--------|--------|--------|--------|--|--|--|--|--|
| SMART           | PDZ                                                                                       | RT | 28 | 1.9 | 2.0E-8 | 2.7E-5 |        |        |  |  |  |  |  |
| GOTERM_BP_FAT   | apical junction assembly                                                                  | RT |    |     | 16     | 1.1    | 2.1E-8 | 3.8E-5 |  |  |  |  |  |
| GOTERM_BP_FAT   | synaptic transmission                                                                     | RT |    |     | 49     | 3.4    | 2.2E-8 | 3.8E-5 |  |  |  |  |  |
| UP_SEQ_FEATURE  | compositionally biased region:Gln-rich                                                    | RT |    |     | 48     | 3.3    | 2.8E-8 | 4.5E-5 |  |  |  |  |  |
| GOTERM_MF_FAT   | NADH dehydrogenase (quinone) activity                                                     | RT |    |     | 19     | 1.3    | 3.0E-8 | 4.7E-5 |  |  |  |  |  |
| GOTERM_MF_FAT   | oxidoreductase activity, acting on NADH or NADPH, quinone or similar compound as acceptor | RT |    |     | 19     | 1.3    | 3.0E-8 | 4.7E-5 |  |  |  |  |  |
| GOTERM_MF_FAT   | NADH dehydrogenase (ubiquinone) activity                                                  | RT |    |     | 19     | 1.3    | 3.0E-8 | 4.7E-5 |  |  |  |  |  |
| GOTERM_BP_FAT   | cell-cell junction organization                                                           | RT |    |     | 18     | 1.2    | 3.5E-8 | 6.1E-5 |  |  |  |  |  |
| SP_PIR_KEYWORDS | muscle protein                                                                            | RT |    |     | 12     | 0.8    | 5.1E-8 | 7.0E-5 |  |  |  |  |  |
| GOTERM_BP_FAT   | neuron differentiation                                                                    | RT |    |     | 83     | 5.7    | 4.6E-8 | 8.0E-5 |  |  |  |  |  |
| GOTERM_BP_FAT   | cell-cell signaling                                                                       | RT |    |     | 52     | 3.6    | 4.6E-8 | 8.0E-5 |  |  |  |  |  |
| GOTERM_BP_FAT   | open tracheal system development                                                          | RT |    |     | 42     | 2.9    | 4.7E-8 | 8.2E-5 |  |  |  |  |  |
| GOTERM_BP_FAT   | respiratory system development                                                            | RT |    |     | 42     | 2.9    | 4.7E-8 | 8.2E-5 |  |  |  |  |  |
| SMART           | SH3                                                                                       | RT | 29 | 2.0 | 6.1E-8 | 8.2E-5 |        |        |  |  |  |  |  |
| GOTERM_BP_FAT   | dorsal closure                                                                            | RT |    |     | 31     | 2.1    | 5.9E-8 | 1.0E-4 |  |  |  |  |  |
| GOTERM_BP_FAT   | cell junction organization                                                                | RT |    |     | 18     | 1.2    | 5.9E-8 | 1.0E-4 |  |  |  |  |  |
| GOTERM_BP_FAT   | cell-cell junction assembly                                                               | RT |    |     | 16     | 1.1    | 7.7E-8 | 1.3E-4 |  |  |  |  |  |
| GOTERM_BP_FAT   | exocrine system development                                                               | RT |    |     | 39     | 2.7    | 8.2E-8 | 1.4E-4 |  |  |  |  |  |
| GOTERM_BP_FAT   | salivary gland development                                                                | RT |    |     | 39     | 2.7    | 8.2E-8 | 1.4E-4 |  |  |  |  |  |
| GOTERM_BP_FAT   | cell adhesion                                                                             | RT |    |     | 45     | 3.1    | 9.7E-8 | 1.7E-4 |  |  |  |  |  |
| SP_PIR_KEYWORDS | calcium                                                                                   | RT |    |     | 41     | 2.8    | 1.3E-7 | 1.7E-4 |  |  |  |  |  |

|                 |                                                         |    |    |     |        |        |        |        |        |        |
|-----------------|---------------------------------------------------------|----|----|-----|--------|--------|--------|--------|--------|--------|
| GOTERM_CC_FAT   | cell junction                                           | RT | 41 | 2.8 | 1.2E-7 | 1.8E-4 |        |        |        |        |
| GOTERM_BP_FAT   | instar larval or pupal development                      | RT |    |     | 83     | 5.7    | 1.2E-7 | 2.2E-4 |        |        |
| GOTERM_BP_FAT   | salivary gland morphogenesis                            | RT |    |     | 34     | 2.3    | 1.4E-7 | 2.4E-4 |        |        |
| GOTERM_BP_FAT   | gland morphogenesis                                     | RT |    | 34  | 2.3    | 1.4E-7 | 2.4E-4 |        |        |        |
| GOTERM_CC_FAT   | contractile fiber part                                  | RT |    | 13  | 0.9    | 1.7E-7 | 2.4E-4 |        |        |        |
| GOTERM_BP_FAT   | cell junction assembly                                  | RT |    | 16  | 1.1    | 1.4E-7 | 2.4E-4 |        |        |        |
| GOTERM_BP_FAT   | regulation of tube size                                 | RT |    | 14  | 1.0    | 1.5E-7 | 2.6E-4 |        |        |        |
| GOTERM_BP_FAT   | cofactor catabolic process                              | RT |    | 17  | 1.2    | 1.6E-7 | 2.7E-4 |        |        |        |
| GOTERM_CC_FAT   | organelle membrane                                      | RT |    | 94  | 6.5    | 2.1E-7 | 2.9E-4 |        |        |        |
| GOTERM_BP_FAT   | regulation of small GTPase mediated signal transduction | RT |    |     |        |        | 30     | 2.1    | 1.7E-7 | 3.0E-4 |
| GOTERM_BP_FAT   | neurotransmitter transport                              | RT |    | 36  | 2.5    | 1.7E-7 | 3.1E-4 |        |        |        |
| GOTERM_BP_FAT   | regulation of tube size, open tracheal system           | RT |    |     |        | 13     | 0.9    | 1.8E-7 | 3.2E-4 |        |
| GOTERM_BP_FAT   | regulation of neurotransmitter levels                   | RT |    |     | 33     | 2.3    | 1.8E-7 | 3.2E-4 |        |        |
| SP_PIR_KEYWORDS | developmental protein                                   | RT |    |     | 97     | 6.7    | 2.5E-7 | 3.4E-4 |        |        |
| SP_PIR_KEYWORDS | atp-binding                                             | RT |    |     | 103    | 7.1    | 2.7E-7 | 3.7E-4 |        |        |
| KEGG_PATHWAY    | Citrate cycle (TCA cycle)                               | RT |    |     | 21     | 1.4    | 3.6E-7 | 3.9E-4 |        |        |
| GOTERM_MF_FAT   | small GTPase regulator activity                         | RT |    |     | 34     | 2.3    | 2.5E-7 | 4.0E-4 |        |        |
| INTERPRO        | EGF-like                                                | RT | 26 | 1.8 | 2.4E-7 | 4.0E-4 |        |        |        |        |
| SP_PIR_KEYWORDS | nucleotide-binding                                      | RT |    |     | 124    | 8.5    | 3.0E-7 | 4.1E-4 |        |        |
| GOTERM_BP_FAT   | acetyl-CoA metabolic process                            | RT |    |     | 17     | 1.2    | 2.6E-7 | 4.5E-4 |        |        |
| GOTERM_BP_FAT   | post-embryonic development                              | RT |    |     | 84     | 5.8    | 3.2E-7 | 5.6E-4 |        |        |



|                 |                                                        |    |    |     |        |        |        |        |        |        |        |
|-----------------|--------------------------------------------------------|----|----|-----|--------|--------|--------|--------|--------|--------|--------|
| GOTERM_BP_FAT   | neurotransmitter secretion                             | RT |    | 31  | 2.1    | 3.4E-7 | 6.0E-4 |        |        |        |        |
| INTERPRO        | Pleckstrin homology-type                               | RT |    | 33  | 2.3    | 3.6E-7 | 6.1E-4 |        |        |        |        |
| GOTERM_BP_FAT   | acetyl-CoA catabolic process                           | RT |    | 16  | 1.1    | 4.1E-7 | 7.1E-4 |        |        |        |        |
| GOTERM_BP_FAT   | tricarboxylic acid cycle                               | RT |    | 16  | 1.1    | 4.1E-7 | 7.1E-4 |        |        |        |        |
| GOTERM_MF_FAT   | GTPase regulator activity                              | RT |    | 40  | 2.7    | 4.8E-7 | 7.5E-4 |        |        |        |        |
| GOTERM_BP_FAT   | generation of a signal involved in cell-cell signaling | RT |    |     |        |        |        | 31     | 2.1    | 4.3E-7 | 7.6E-4 |
| GOTERM_CC_FAT   | cell-cell junction                                     | RT | 23 | 1.6 | 5.5E-7 | 7.8E-4 |        |        |        |        |        |
| GOTERM_BP_FAT   | autophagic cell death                                  | RT |    | 24  | 1.6    | 5.3E-7 | 9.2E-4 |        |        |        |        |
| GOTERM_BP_FAT   | salivary gland cell autophagic cell death              | RT |    |     |        | 24     | 1.6    | 5.3E-7 | 9.2E-4 |        |        |
| GOTERM_BP_FAT   | salivary gland histolysis                              | RT |    | 24  | 1.6    | 5.3E-7 | 9.2E-4 |        |        |        |        |
| GOTERM_CC_FAT   | occluding junction                                     | RT | 15 | 1.0 | 6.6E-7 | 9.4E-4 |        |        |        |        |        |
| SP_PIR_KEYWORDS | cytoplasm                                              | RT |    | 81  | 5.6    | 6.9E-7 | 9.5E-4 |        |        |        |        |
| GOTERM_BP_FAT   | coenzyme catabolic process                             | RT |    | 16  | 1.1    | 6.7E-7 | 1.2E-3 |        |        |        |        |
| GOTERM_CC_FAT   | apical junction complex                                | RT |    | 19  | 1.3    | 8.6E-7 | 1.2E-3 |        |        |        |        |
| GOTERM_BP_FAT   | regulation of Ras protein signal transduction          | RT |    |     |        | 26     | 1.8    | 7.2E-7 | 1.3E-3 |        |        |
| GOTERM_BP_FAT   | muscle cell differentiation                            | RT |    | 25  | 1.7    | 7.2E-7 | 1.3E-3 |        |        |        |        |
| GOTERM_CC_FAT   | contractile fiber                                      | RT | 13 | 0.9 | 9.0E-7 | 1.3E-3 |        |        |        |        |        |
| GOTERM_MF_FAT   | nucleoside-triphosphatase regulator activity           | RT |    |     |        | 40     | 2.7    | 8.6E-7 | 1.3E-3 |        |        |
| GOTERM_BP_FAT   | neuron development                                     | RT |    | 70  | 4.8    | 7.8E-7 | 1.4E-3 |        |        |        |        |
| GOTERM_BP_FAT   | tissue death                                           | RT | 24 | 1.6 | 9.5E-7 | 1.7E-3 |        |        |        |        |        |
| GOTERM_BP_FAT   | histolysis                                             | RT | 24 | 1.6 | 9.5E-7 | 1.7E-3 |        |        |        |        |        |

|                 |                                                       |    |  |    |     |        |        |     |        |        |
|-----------------|-------------------------------------------------------|----|--|----|-----|--------|--------|-----|--------|--------|
| GOTERM_BP_FAT   | biological adhesion                                   | RT |  | 45 | 3.1 | 1.0E-6 | 1.8E-3 |     |        |        |
| GOTERM_BP_FAT   | regulation of tube architecture, open tracheal system | RT |  |    |     |        | 17     | 1.2 | 1.0E-6 | 1.8E-3 |
| GOTERM_BP_FAT   | aerobic respiration                                   | RT |  | 16 | 1.1 | 1.1E-6 | 1.9E-3 |     |        |        |
| GOTERM_BP_FAT   | programmed cell death                                 | RT |  | 39 | 2.7 | 1.2E-6 | 2.1E-3 |     |        |        |
| GOTERM_BP_FAT   | cell motion                                           | RT |  | 63 | 4.3 | 1.3E-6 | 2.3E-3 |     |        |        |
| GOTERM_BP_FAT   | negative regulation of cell communication             | RT |  |    |     |        | 30     | 2.1 | 1.5E-6 | 2.6E-3 |
| GOTERM_CC_FAT   | sarcomere                                             | RT |  | 11 | 0.8 | 1.9E-6 | 2.7E-3 |     |        |        |
| SMART           | EGF                                                   | RT |  | 26 | 1.8 | 2.0E-6 | 2.8E-3 |     |        |        |
| GOTERM_CC_FAT   | actin cytoskeleton                                    | RT |  | 29 | 2.0 | 1.9E-6 | 2.8E-3 |     |        |        |
| GOTERM_MF_FAT   | actin binding                                         | RT |  | 35 | 2.4 | 1.8E-6 | 2.8E-3 |     |        |        |
| SP_PIR_KEYWORDS | actin-binding                                         | RT |  |    |     |        | 18     | 1.2 | 2.3E-6 | 3.1E-3 |
| GOTERM_BP_FAT   | vesicle-mediated transport                            | RT |  | 75 | 5.2 | 2.2E-6 | 3.8E-3 |     |        |        |
| GOTERM_BP_FAT   | gland development                                     | RT |  | 40 | 2.7 | 2.3E-6 | 4.1E-3 |     |        |        |
| INTERPRO        | Variant SH3                                           | RT |  | 11 | 0.8 | 2.5E-6 | 4.2E-3 |     |        |        |
| GOTERM_BP_FAT   | septate junction assembly                             | RT |  | 11 | 0.8 | 2.6E-6 | 4.6E-3 |     |        |        |
| GOTERM_BP_FAT   | secretion by cell                                     | RT |  | 32 | 2.2 | 3.2E-6 | 5.7E-3 |     |        |        |
| GOTERM_CC_FAT   | apicolateral plasma membrane                          | RT |  |    |     |        | 19     | 1.3 | 4.4E-6 | 6.2E-3 |
| GOTERM_CC_FAT   | myofibril                                             | RT |  | 11 | 0.8 | 4.6E-6 | 6.5E-3 |     |        |        |
| GOTERM_BP_FAT   | striated muscle cell differentiation                  | RT |  |    |     |        | 22     | 1.5 | 3.8E-6 | 6.7E-3 |
| GOTERM_BP_FAT   | negative regulation of signal transduction            | RT |  |    |     |        | 29     | 2.0 | 3.8E-6 | 6.7E-3 |
| INTERPRO        | Pleckstrin homology                                   | RT |  | 25 | 1.7 | 4.0E-6 | 6.7E-3 |     |        |        |

|                 |                                                     |    |  |    |     |        |        |        |               |
|-----------------|-----------------------------------------------------|----|--|----|-----|--------|--------|--------|---------------|
| GOTERM_BP_FAT   | regulation of cell morphogenesis                    | RT |  | 32 | 2.2 | 3.9E-6 | 6.8E-3 |        |               |
| SP_PIR_KEYWORDS | sh3 domain                                          | RT |  | 18 | 1.2 | 6.2E-6 | 8.5E-3 |        |               |
| GOTERM_BP_FAT   | cell death                                          | RT |  | 39 | 2.7 | 5.2E-6 | 9.1E-3 |        |               |
| GOTERM_BP_FAT   | chitin-based embryonic cuticle biosynthetic process | RT |  |    |     |        | 11     | 0.8    | 5.3E-6 9.2E-3 |
| GOTERM_BP_FAT   | cell proliferation                                  | RT |  | 33 | 2.3 | 5.9E-6 | 1.0E-2 |        |               |
| GOTERM_BP_FAT   | cytoskeleton organization                           | RT |  | 84 | 5.8 | 5.9E-6 | 1.0E-2 |        |               |
| GOTERM_BP_FAT   | death                                               | RT |  | 39 | 2.7 | 6.1E-6 | 1.1E-2 |        |               |
| SP_PIR_KEYWORDS | oxidoreductase                                      | RT |  | 94 | 6.5 | 8.3E-6 | 1.1E-2 |        |               |
| GOTERM_BP_FAT   | neurological system process                         | RT |  | 95 | 6.5 | 6.7E-6 | 1.2E-2 |        |               |
| GOTERM_CC_FAT   | plasma membrane part                                | RT |  | 83 | 5.7 | 8.8E-6 | 1.2E-2 |        |               |
| GOTERM_MF_FAT   | calcium ion binding                                 | RT |  | 54 | 3.7 | 1.0E-5 | 1.6E-2 |        |               |
| GOTERM_BP_FAT   | synaptic vesicle transport                          | RT |  | 26 | 1.8 | 1.0E-5 | 1.7E-2 |        |               |
| GOTERM_BP_FAT   | secretion                                           | RT |  | 32 | 2.2 | 1.2E-5 | 2.0E-2 |        |               |
| SP_PIR_KEYWORDS | transit peptide                                     | RT |  | 29 | 2.0 | 1.7E-5 | 2.4E-2 |        |               |
| GOTERM_BP_FAT   | muscle cell development                             | RT |  | 17 | 1.2 | 1.4E-5 | 2.4E-2 |        |               |
| GOTERM_BP_FAT   | striated muscle cell development                    | RT |  | 17 | 1.2 | 1.4E-5 | 2.4E-2 |        |               |
| GOTERM_MF_FAT   | protein serine/threonine kinase activity            | RT |  |    |     | 47     | 3.2    | 1.5E-5 | 2.4E-2        |
| GOTERM_BP_FAT   | protein amino acid phosphorylation                  | RT |  | 53 | 3.6 | 1.4E-5 | 2.4E-2 |        |               |
| GOTERM_MF_FAT   | inorganic cation transmembrane transporter activity | RT |  |    |     |        | 34     | 2.3    | 1.6E-5 2.5E-2 |
| INTERPRO        | Serine/threonine protein kinase                     | RT |  | 31 | 2.1 | 1.5E-5 | 2.6E-2 |        |               |
| INTERPRO        | EGF-like, type 3                                    | RT |  | 20 | 1.4 | 1.6E-5 | 2.6E-2 |        |               |

|                 |                                                                |    |  |     |     |        |        |        |     |        |        |
|-----------------|----------------------------------------------------------------|----|--|-----|-----|--------|--------|--------|-----|--------|--------|
| SP_PIR_KEYWORDS | mitochondrion                                                  | RT |  | 40  | 2.7 | 2.2E-5 | 3.0E-2 |        |     |        |        |
| SP_PIR_KEYWORDS | kinase                                                         | RT |  | 44  | 3.0 | 2.3E-5 | 3.2E-2 |        |     |        |        |
| GOTERM_MF_FAT   | monovalent inorganic cation transmembrane transporter activity | RT |  |     |     |        |        | 28     | 1.9 | 2.1E-5 | 3.3E-2 |
| SP_PIR_KEYWORDS | ubl conjugation pathway                                        | RT |  |     | 26  | 1.8    | 2.4E-5 | 3.3E-2 |     |        |        |
| INTERPRO        | Protein kinase, ATP binding site                               | RT |  |     | 43  | 3.0    | 2.0E-5 | 3.3E-2 |     |        |        |
| GOTERM_BP_FAT   | oxidation reduction                                            | RT |  | 103 | 7.1 | 2.0E-5 | 3.5E-2 |        |     |        |        |
| GOTERM_CC_FAT   | plasma membrane                                                | RT |  | 138 | 9.5 | 2.6E-5 | 3.7E-2 |        |     |        |        |
| SMART           | PH                                                             | RT |  | 25  | 1.7 | 2.8E-5 | 3.8E-2 |        |     |        |        |
| GOTERM_CC_FAT   | myosin II complex                                              | RT |  | 7   | 0.5 | 2.8E-5 | 4.0E-2 |        |     |        |        |
| GOTERM_BP_FAT   | cellular protein complex assembly                              | RT |  |     | 24  | 1.6    | 2.3E-5 | 4.1E-2 |     |        |        |
| GOTERM_BP_FAT   | membrane organization                                          | RT |  | 61  | 4.2 | 2.5E-5 | 4.4E-2 |        |     |        |        |
| GOTERM_BP_FAT   | skeletal muscle organ development                              | RT |  |     | 19  | 1.3    | 2.7E-5 | 4.6E-2 |     |        |        |
| GOTERM_MF_FAT   | hydrogen ion transmembrane transporter activity                | RT |  |     |     |        |        | 27     | 1.9 | 4.1E-5 | 6.4E-2 |
| GOTERM_BP_FAT   | myofibril assembly                                             | RT |  | 9   | 0.6 | 3.7E-5 | 6.5E-2 |        |     |        |        |
| SP_PIR_KEYWORDS | egf-like domain                                                | RT |  |     | 17  | 1.2    | 4.8E-5 | 6.6E-2 |     |        |        |
| INTERPRO        | EF-Hand type                                                   | RT |  | 28  | 1.9 | 4.2E-5 | 7.0E-2 |        |     |        |        |
| SP_PIR_KEYWORDS | transmembrane protein                                          | RT |  |     | 21  | 1.4    | 5.2E-5 | 7.1E-2 |     |        |        |
| GOTERM_BP_FAT   | cuticle development                                            | RT |  | 20  | 1.4 | 4.2E-5 | 7.4E-2 |        |     |        |        |
| SP_PIR_KEYWORDS | ATP                                                            | RT |  | 20  | 1.4 | 5.9E-5 | 8.1E-2 |        |     |        |        |
| UP_SEQ_FEATURE  | mutagenesis site                                               | RT |  | 48  | 3.3 | 5.0E-5 | 8.2E-2 |        |     |        |        |
| GOTERM_BP_FAT   | post-embryonic organ morphogenesis                             | RT |  |     | 55  | 3.8    | 4.7E-5 | 8.3E-2 |     |        |        |

|               |                             |    |  |    |     |        |        |
|---------------|-----------------------------|----|--|----|-----|--------|--------|
| GOTERM_BP_FAT | imaginal disc morphogenesis | RT |  | 55 | 3.8 | 4.7E-5 | 8.3E-2 |
| GOTERM_BP_FAT | regulation of cell shape    | RT |  | 26 | 1.8 | 4.9E-5 | 8.5E-2 |
| GOTERM_BP_FAT | protein kinase cascade      | RT |  | 19 | 1.3 | 5.7E-5 | 1.0E-1 |
| GOTERM_CC_FAT | cytoskeleton                | RT |  | 71 | 4.9 | 7.2E-5 | 1.0E-1 |
| GOTERM_CC_FAT | synapse                     | RT |  | 33 | 2.3 | 7.4E-5 | 1.0E-1 |

\*\*\*\*\*

-D

C

+D

Functional annotation chart:

| Sublist | Category Term | RT | Genes                          | Count | %  | P-Value | FDR |         |        |
|---------|---------------|----|--------------------------------|-------|----|---------|-----|---------|--------|
|         | GOTERM_CC_FAT |    | Golgi apparatus part           |       | RT | 23      | 3.6 | 1.9E-10 | 2.6E-7 |
|         | GOTERM_CC_FAT |    | endoplasmic reticulum part     |       | RT | 26      | 4.1 | 7.8E-10 | 1.0E-6 |
|         | GOTERM_CC_FAT |    | endoplasmic reticulum          |       | RT | 43      | 6.8 | 1.3E-9  | 1.7E-6 |
|         | GOTERM_CC_FAT |    | Golgi-associated vesicle       |       | RT | 12      | 1.9 | 2.3E-9  | 3.1E-6 |
|         | GOTERM_CC_FAT |    | rough endoplasmic reticulum    |       | RT | 10      | 1.6 | 6.1E-9  | 8.0E-6 |
|         | GOTERM_CC_FAT |    | endoplasmic reticulum membrane |       | RT | 20      | 3.2 | 1.0E-8  | 1.3E-5 |

|               |                                                             |    |    |     |        |        |        |        |        |  |
|---------------|-------------------------------------------------------------|----|----|-----|--------|--------|--------|--------|--------|--|
| GOTERM_CC_FAT | Golgi apparatus                                             | RT | 30 | 4.7 | 1.0E-8 | 1.4E-5 |        |        |        |  |
| GOTERM_CC_FAT | organelle membrane                                          | RT |    | 54  | 8.5    | 1.1E-8 | 1.5E-5 |        |        |  |
| GOTERM_CC_FAT | endomembrane system                                         | RT | 35 | 5.5 | 1.5E-8 | 1.9E-5 |        |        |        |  |
| GOTERM_CC_FAT | nuclear envelope-endoplasmic reticulum network              | RT |    |     |        | 20     | 3.2    | 1.6E-8 | 2.1E-5 |  |
| GOTERM_BP_FAT | cotranslational protein targeting to membrane               | RT |    |     |        | 10     | 1.6    | 2.4E-8 | 3.9E-5 |  |
| GOTERM_CC_FAT | rough endoplasmic reticulum membrane                        | RT |    | 9   | 1.4    | 3.0E-8 | 3.9E-5 |        |        |  |
| GOTERM_CC_FAT | Golgi membrane                                              | RT | 14 | 2.2 | 1.3E-7 | 1.7E-4 |        |        |        |  |
| GOTERM_BP_FAT | protein targeting to ER                                     | RT | 9  | 1.4 | 2.7E-7 | 4.4E-4 |        |        |        |  |
| GOTERM_BP_FAT | SRP-dependent cotranslational protein targeting to membrane | RT |    |     |        | 9      | 1.4    | 2.7E-7 | 4.4E-4 |  |
| GOTERM_MF_FAT | exopeptidase activity                                       | RT | 21 | 3.3 | 3.1E-7 | 4.6E-4 |        |        |        |  |
| GOTERM_BP_FAT | protein targeting to membrane                               | RT |    | 11  | 1.7    | 2.9E-7 | 4.7E-4 |        |        |  |
| GOTERM_BP_FAT | retrograde vesicle-mediated transport, Golgi to ER          | RT |    |     |        | 7      | 1.1    | 6.0E-7 | 1.0E-3 |  |
| GOTERM_BP_FAT | intracellular protein transport                             | RT |    | 25  | 3.9    | 8.5E-7 | 1.4E-3 |        |        |  |
| GOTERM_CC_FAT | Golgi-associated vesicle membrane                           | RT |    | 8   | 1.3    | 1.8E-6 | 2.3E-3 |        |        |  |
| GOTERM_BP_FAT | cellular protein localization                               | RT | 25 | 3.9 | 1.4E-6 | 2.4E-3 |        |        |        |  |
| GOTERM_CC_FAT | COPI coated vesicle membrane                                | RT |    | 7   | 1.1    | 1.9E-6 | 2.5E-3 |        |        |  |
| GOTERM_CC_FAT | COPI vesicle coat                                           | RT | 7  | 1.1 | 1.9E-6 | 2.5E-3 |        |        |        |  |
| GOTERM_CC_FAT | vesicle coat                                                | RT | 9  | 1.4 | 2.0E-6 | 2.6E-3 |        |        |        |  |
| GOTERM_BP_FAT | protein transport                                           | RT | 32 | 5.1 | 2.5E-6 | 4.1E-3 |        |        |        |  |
| GOTERM_CC_FAT | COPI-coated vesicle                                         | RT | 7  | 1.1 | 4.4E-6 | 5.9E-3 |        |        |        |  |
| GOTERM_BP_FAT | establishment of protein localization                       | RT |    | 32  | 5.1    | 4.2E-6 | 6.9E-3 |        |        |  |

|                 |                                   |    |    |     |        |        |  |
|-----------------|-----------------------------------|----|----|-----|--------|--------|--|
| GOTERM_CC_FAT   | coated vesicle membrane           | RT | 9  | 1.4 | 1.2E-5 | 1.6E-2 |  |
| GOTERM_MF_FAT   | aminopeptidase activity           | RT | 12 | 1.9 | 1.1E-5 | 1.7E-2 |  |
| GOTERM_BP_FAT   | intracellular transport           | RT | 33 | 5.2 | 1.1E-5 | 1.8E-2 |  |
| GOTERM_BP_FAT   | protein localization              | RT | 38 | 6.0 | 1.4E-5 | 2.3E-2 |  |
| GOTERM_CC_FAT   | cytoplasmic vesicle part          | RT | 9  | 1.4 | 1.7E-5 | 2.3E-2 |  |
| GOTERM_CC_FAT   | cytoplasmic vesicle membrane      | RT | 9  | 1.4 | 1.7E-5 | 2.3E-2 |  |
| GOTERM_BP_FAT   | Golgi vesicle transport           | RT | 11 | 1.7 | 1.6E-5 | 2.6E-2 |  |
| GOTERM_CC_FAT   | translocon complex                | RT | 6  | 0.9 | 2.3E-5 | 3.1E-2 |  |
| GOTERM_BP_FAT   | hexose metabolic process          | RT | 15 | 2.4 | 2.3E-5 | 3.8E-2 |  |
| GOTERM_BP_FAT   | monosaccharide metabolic process  | RT | 16 | 2.5 | 2.6E-5 | 4.2E-2 |  |
| GOTERM_BP_FAT   | protein targeting                 | RT | 17 | 2.7 | 2.7E-5 | 4.4E-2 |  |
| GOTERM_MF_FAT   | vitamin binding                   | RT | 17 | 2.7 | 3.7E-5 | 5.4E-2 |  |
| GOTERM_BP_FAT   | mannose metabolic process         | RT | 6  | 0.9 | 3.8E-5 | 6.2E-2 |  |
| GOTERM_BP_FAT   | protein localization in organelle | RT | 15 | 2.4 | 5.0E-5 | 8.3E-2 |  |
| GOTERM_CC_FAT   | vesicle membrane                  | RT | 9  | 1.4 | 6.5E-5 | 8.5E-2 |  |
| SP_PIR_KEYWORDS | transport                         | RT | 42 | 6.6 | 8.2E-5 | 1.0E-1 |  |

\*\*\*\*\*

-D

+D

C

Functional annotation chart:

| Sublist | Category Term   | RT                                   | Genes | Count | %   | P-Value | FDR     |
|---------|-----------------|--------------------------------------|-------|-------|-----|---------|---------|
|         | GOTERM_CC_FAT   | ribonucleoprotein complex            | RT    | 176   | 5.3 | 2.6E-25 | 3.8E-22 |
|         | SP_PIR_KEYWORDS | ribonucleoprotein                    | RT    | 88    | 2.6 | 6.5E-24 | 9.0E-21 |
|         | GOTERM_CC_FAT   | cytosolic part                       | RT    | 82    | 2.5 | 2.9E-23 | 4.2E-20 |
|         | GOTERM_CC_FAT   | cytosolic ribosome                   | RT    | 66    | 2.0 | 1.6E-22 | 2.2E-19 |
|         | GOTERM_MF_FAT   | structural constituent of ribosome   | RT    | 95    | 2.9 | 1.3E-18 | 2.1E-15 |
|         | GOTERM_CC_FAT   | ribosome                             | RT    | 97    | 2.9 | 4.0E-18 | 5.7E-15 |
|         | KEGG_PATHWAY    | Ribosome                             | RT    | 67    | 2.0 | 5.4E-18 | 6.1E-15 |
|         | GOTERM_CC_FAT   | ribosomal subunit                    | RT    | 89    | 2.7 | 4.3E-18 | 6.1E-15 |
|         | GOTERM_BP_FAT   | RNA processing                       | RT    | 129   | 3.9 | 2.0E-17 | 3.5E-14 |
|         | GOTERM_BP_FAT   | ribonucleoprotein complex biogenesis | RT    | 57    | 1.7 | 8.7E-17 | 2.0E-13 |
|         | GOTERM_CC_FAT   | cytosolic large ribosomal subunit    | RT    | 41    | 1.2 | 5.7E-15 | 8.3E-12 |
|         | SP_PIR_KEYWORDS | ribosomal protein                    | RT    | 85    | 2.6 | 9.6E-15 | 1.3E-11 |
|         | GOTERM_BP_FAT   | ribosome biogenesis                  | RT    | 42    | 1.3 | 4.1E-14 | 7.2E-11 |
|         | GOTERM_CC_FAT   | large ribosomal subunit              | RT    | 54    | 1.6 | 1.4E-10 | 2.0E-7  |
|         | GOTERM_BP_FAT   | protein folding                      | RT    | 55    | 1.7 | 1.5E-10 | 2.6E-7  |
|         | GOTERM_BP_FAT   | intracellular transport              | RT    | 112   | 3.4 | 2.9E-10 | 5.1E-7  |



|                 |                                                                                      |    |    |     |        |         |        |        |  |
|-----------------|--------------------------------------------------------------------------------------|----|----|-----|--------|---------|--------|--------|--|
| GOTERM_BP_FAT   | mitotic spindle elongation                                                           | RT |    | 42  | 1.3    | 3.2E-10 | 5.7E-7 |        |  |
| GOTERM_BP_FAT   | spindle elongation                                                                   | RT |    | 42  | 1.3    | 5.4E-10 | 9.5E-7 |        |  |
| GOTERM_BP_FAT   | mRNA metabolic process                                                               | RT |    | 85  | 2.6    | 6.2E-10 | 1.1E-6 |        |  |
| GOTERM_BP_FAT   | RNA splicing                                                                         | RT |    | 64  | 1.9    | 7.1E-10 | 1.3E-6 |        |  |
| GOTERM_CC_FAT   | membrane-enclosed lumen                                                              | RT |    | 191 | 5.8    | 1.9E-9  | 2.8E-6 |        |  |
| KEGG_PATHWAY    | Spliceosome                                                                          | RT |    | 65  | 2.0    | 2.6E-9  | 2.9E-6 |        |  |
| SP_PIR_KEYWORDS | rna-binding                                                                          | RT |    | 67  | 2.0    | 3.6E-9  | 4.9E-6 |        |  |
| GOTERM_BP_FAT   | ncRNA metabolic process                                                              | RT |    | 58  | 1.7    | 3.4E-9  | 6.0E-6 |        |  |
| GOTERM_BP_FAT   | mRNA processing                                                                      | RT |    | 76  | 2.3    | 3.5E-9  | 6.1E-6 |        |  |
| GOTERM_BP_FAT   | ncRNA processing                                                                     | RT |    | 45  | 1.4    | 3.6E-9  | 6.4E-6 |        |  |
| GOTERM_BP_FAT   | post-mating behavior                                                                 | RT |    | 17  | 0.5    | 4.8E-9  | 8.4E-6 |        |  |
| GOTERM_CC_FAT   | intracellular organelle lumen                                                        | RT |    |     | 184    | 5.5     | 1.1E-8 | 1.5E-5 |  |
| GOTERM_CC_FAT   | organelle lumen                                                                      | RT |    | 184 | 5.5    | 1.1E-8  | 1.5E-5 |        |  |
| GOTERM_CC_FAT   | nuclear lumen                                                                        | RT |    | 137 | 4.1    | 1.3E-8  | 1.9E-5 |        |  |
| GOTERM_CC_FAT   | spliceosome                                                                          | RT |    | 39  | 1.2    | 2.1E-8  | 3.0E-5 |        |  |
| GOTERM_BP_FAT   | nucleocytoplasmic transport                                                          | RT |    |     | 37     | 1.1     | 2.2E-8 | 3.9E-5 |  |
| GOTERM_BP_FAT   | nuclear transport                                                                    | RT |    | 37  | 1.1    | 2.2E-8  | 3.9E-5 |        |  |
| GOTERM_BP_FAT   | mitotic spindle organization                                                         | RT |    | 73  | 2.2    | 5.2E-8  | 9.1E-5 |        |  |
| SMART           | Sm                                                                                   | RT | 15 | 0.5 | 7.1E-8 | 9.5E-5  |        |        |  |
| GOTERM_BP_FAT   | RNA splicing, via transesterification reactions with bulged adenosine as nucleophile | RT |    |     | 53     | 1.6     | 7.6E-8 | 1.3E-4 |  |
| GOTERM_BP_FAT   | nuclear mRNA splicing, via spliceosome                                               | RT |    |     | 53     | 1.6     | 7.6E-8 | 1.3E-4 |  |

|                 |                                                              |    |  |     |     |        |        |        |        |        |
|-----------------|--------------------------------------------------------------|----|--|-----|-----|--------|--------|--------|--------|--------|
| GOTERM_BP_FAT   | RNA splicing, via transesterification reactions              | RT |  | 53  | 1.6 | 1.0E-7 | 1.8E-4 |        |        |        |
| GOTERM_CC_FAT   | cytosolic small ribosomal subunit                            | RT |  | 25  | 0.8 | 1.4E-7 | 1.9E-4 |        |        |        |
| GOTERM_CC_FAT   | small ribosomal subunit                                      | RT |  | 36  | 1.1 | 1.7E-7 | 2.5E-4 |        |        |        |
| SP_PIR_KEYWORDS | protein biosynthesis                                         | RT |  | 47  | 1.4 | 2.4E-7 | 3.3E-4 |        |        |        |
| GOTERM_BP_FAT   | spindle organization                                         | RT |  | 79  | 2.4 | 4.0E-7 | 7.0E-4 |        |        |        |
| GOTERM_CC_FAT   | non-membrane-bounded organelle                               | RT |  | 277 | 8.3 | 5.1E-7 | 7.3E-4 |        |        |        |
| GOTERM_CC_FAT   | intracellular non-membrane-bounded organelle                 | RT |  |     |     | 277    | 8.3    | 5.1E-7 | 7.3E-4 |        |
| SP_PIR_KEYWORDS | ribosome                                                     | RT |  | 19  | 0.6 | 9.2E-7 | 1.3E-3 |        |        |        |
| SP_PIR_KEYWORDS | mrna splicing                                                | RT |  | 23  | 0.7 | 1.0E-6 | 1.4E-3 |        |        |        |
| COG_ONTOLOGY    | Translation, ribosomal structure and biogenesis              | RT |  |     | 34  | 1.0    | 2.2E-6 | 2.0E-3 |        |        |
| INTERPRO        | Like-Sm ribonucleoprotein, eukaryotic and archaea-type, core | RT |  |     |     |        | 15     | 0.5    | 1.2E-6 | 2.2E-3 |
| INTERPRO        | Like-Sm ribonucleoprotein, core                              | RT |  |     | 15  | 0.5    | 1.2E-6 | 2.2E-3 |        |        |
| GOTERM_MF_FAT   | mRNA binding                                                 | RT |  | 72  | 2.2 | 1.5E-6 | 2.4E-3 |        |        |        |
| SP_PIR_KEYWORDS | mrna processing                                              | RT |  | 28  | 0.8 | 1.8E-6 | 2.5E-3 |        |        |        |
| GOTERM_BP_FAT   | rRNA processing                                              | RT |  | 23  | 0.7 | 1.6E-6 | 2.7E-3 |        |        |        |
| GOTERM_BP_FAT   | microtubule-based process                                    | RT |  | 123 | 3.7 | 2.0E-6 | 3.5E-3 |        |        |        |
| GOTERM_BP_FAT   | rRNA metabolic process                                       | RT |  | 23  | 0.7 | 2.7E-6 | 4.8E-3 |        |        |        |
| GOTERM_CC_FAT   | small nuclear ribonucleoprotein complex                      | RT |  |     | 39  | 1.2    | 3.7E-6 | 5.3E-3 |        |        |
| GOTERM_BP_FAT   | RNA export from nucleus                                      | RT |  | 16  | 0.5 | 4.2E-6 | 7.3E-3 |        |        |        |
| GOTERM_BP_FAT   | nuclear export                                               | RT |  | 19  | 0.6 | 5.0E-6 | 8.8E-3 |        |        |        |
| GOTERM_CC_FAT   | nucleoplasm part                                             | RT |  | 86  | 2.6 | 6.1E-6 | 8.8E-3 |        |        |        |

|               |                                       |    |     |     |        |        |        |
|---------------|---------------------------------------|----|-----|-----|--------|--------|--------|
| GOTERM_BP_FAT | microtubule cytoskeleton organization | RT |     | 94  | 2.8    | 6.2E-6 | 1.1E-2 |
| GOTERM_BP_FAT | translation                           | RT | 148 | 4.5 | 8.0E-6 | 1.4E-2 |        |
| GOTERM_CC_FAT | nucleoplasm                           | RT | 92  | 2.8 | 1.2E-5 | 1.7E-2 |        |
| GOTERM_BP_FAT | ribonucleoprotein complex assembly    | RT |     | 20  | 0.6    | 1.0E-5 | 1.8E-2 |
| GOTERM_BP_FAT | oxidation reduction                   | RT |     | 171 | 5.1    | 1.1E-5 | 1.9E-2 |
| GOTERM_BP_FAT | tRNA metabolic process                | RT |     | 38  | 1.1    | 2.0E-5 | 3.6E-2 |
| SMART         | RRM                                   | RT | 50  | 1.5 | 3.8E-5 | 5.1E-2 |        |
| GOTERM_MF_FAT | unfolded protein binding              | RT |     | 34  | 1.0    | 3.9E-5 | 6.2E-2 |
| GOTERM_BP_FAT | mRNA export from nucleus              | RT |     | 14  | 0.4    | 4.2E-5 | 7.4E-2 |
| GOTERM_BP_FAT | sulfur amino acid metabolic process   | RT |     | 11  | 0.3    | 5.7E-5 | 1.0E-1 |

\*\*\*\*\*

C  
-D  
+D

Functional annotation chart:

| Sublist | Category Term | RT                   | Genes | Count | %   | P-Value | FDR    |
|---------|---------------|----------------------|-------|-------|-----|---------|--------|
|         | GOTERM_CC_FAT | mitochondrial matrix | RT    | 38    | 4.3 | 5.9E-9  | 8.0E-6 |

|               |                                                                                                |    |    |      |        |        |    |     |        |        |        |        |        |        |
|---------------|------------------------------------------------------------------------------------------------|----|----|------|--------|--------|----|-----|--------|--------|--------|--------|--------|--------|
| GOTERM_CC_FAT | mitochondrial lumen                                                                            | RT | 38 | 4.3  | 5.9E-9 | 8.0E-6 |    |     |        |        |        |        |        |        |
| GOTERM_MF_FAT | ATPase activity, coupled to movement of substances                                             |    |    |      |        |        | 32 | 3.6 | 1.2E-8 | 1.8E-5 |        |        |        |        |
| GOTERM_MF_FAT | ATPase activity, coupled to transmembrane movement of substances                               |    |    |      |        |        | RT |     | 32     | 3.6    | 1.2E-8 | 1.8E-5 |        |        |
| GOTERM_CC_FAT | mitochondrion                                                                                  | RT | 88 | 10.0 | 1.4E-8 | 1.9E-5 |    |     |        |        |        |        |        |        |
| GOTERM_MF_FAT | hydrolase activity, acting on acid anhydrides, catalyzing transmembrane movement of substances |    |    |      |        |        |    |     |        | RT     | 32     | 3.6    | 1.7E-8 | 2.5E-5 |
| GOTERM_CC_FAT | mitochondrial part                                                                             | RT | 69 | 7.8  | 2.9E-8 | 3.9E-5 |    |     |        |        |        |        |        |        |
| GOTERM_MF_FAT | primary active transmembrane transporter activity                                              |    |    |      |        |        | RT | 34  | 3.9    | 3.3E-8 | 5.0E-5 |        |        |        |
| GOTERM_MF_FAT | P-P-bond-hydrolysis-driven transmembrane transporter activity                                  |    |    |      |        |        | RT | 34  | 3.9    | 3.3E-8 | 5.0E-5 |        |        |        |
| GOTERM_MF_FAT | ATPase activity                                                                                | RT | 54 | 6.1  | 4.8E-7 | 7.3E-4 |    |     |        |        |        |        |        |        |
| GOTERM_MF_FAT | actin binding                                                                                  | RT | 27 | 3.1  | 7.2E-7 | 1.1E-3 |    |     |        |        |        |        |        |        |
| GOTERM_CC_FAT | vacuolar membrane                                                                              | RT | 14 | 1.6  | 1.3E-6 | 1.8E-3 |    |     |        |        |        |        |        |        |
| GOTERM_CC_FAT | vacuolar part                                                                                  | RT | 14 | 1.6  | 1.3E-6 | 1.8E-3 |    |     |        |        |        |        |        |        |
| GOTERM_BP_FAT | purine nucleoside triphosphate biosynthetic process                                            |    |    |      |        |        | RT | 20  | 2.3    | 1.2E-6 | 2.0E-3 |        |        |        |
| GOTERM_BP_FAT | purine ribonucleoside triphosphate biosynthetic process                                        |    |    |      |        |        | RT | 20  | 2.3    | 1.2E-6 | 2.0E-3 |        |        |        |
| GOTERM_MF_FAT | ATPase activity, coupled to transmembrane movement of ions, phosphorylative mechanism          |    |    |      |        |        |    |     |        | RT     | 20     | 2.3    | 1.5E-6 | 2.3E-3 |
| GOTERM_CC_FAT | vacuolar proton-transporting V-type ATPase complex                                             |    |    |      |        |        | RT | 13  | 1.5    | 1.8E-6 | 2.4E-3 |        |        |        |
| GOTERM_BP_FAT | ribonucleoside triphosphate biosynthetic process                                               |    |    |      |        |        | RT | 20  | 2.3    | 1.5E-6 | 2.5E-3 |        |        |        |
| GOTERM_BP_FAT | nucleoside triphosphate biosynthetic process                                                   |    |    |      |        |        | RT | 20  | 2.3    | 1.5E-6 | 2.5E-3 |        |        |        |
| GOTERM_BP_FAT | ribonucleotide biosynthetic process                                                            |    |    |      |        |        | RT | 23  | 2.6    | 1.5E-6 | 2.6E-3 |        |        |        |
| GOTERM_CC_FAT | proton-transporting V-type ATPase complex                                                      |    |    |      |        |        | RT | 14  | 1.6    | 1.9E-6 | 2.6E-3 |        |        |        |
| GOTERM_CC_FAT | mitochondrial ribosome                                                                         | RT | 21 | 2.4  | 2.2E-6 | 3.0E-3 |    |     |        |        |        |        |        |        |

|                 |                                                            |    |     |      |        |        |        |        |  |  |
|-----------------|------------------------------------------------------------|----|-----|------|--------|--------|--------|--------|--|--|
| GOTERM_CC_FAT   | organellar ribosome                                        | RT | 21  | 2.4  | 2.2E-6 | 3.0E-3 |        |        |  |  |
| GOTERM_BP_FAT   | ATP biosynthetic process                                   | RT | 19  | 2.2  | 2.4E-6 | 4.1E-3 |        |        |  |  |
| GOTERM_BP_FAT   | purine ribonucleotide biosynthetic process                 | RT |     |      | 22     | 2.5    | 2.6E-6 | 4.4E-3 |  |  |
| GOTERM_MF_FAT   | ATPase activity, coupled                                   | RT | 47  | 5.3  | 3.0E-6 | 4.6E-3 |        |        |  |  |
| GOTERM_BP_FAT   | purine ribonucleoside triphosphate metabolic process       | RT |     |      | 20     | 2.3    | 3.1E-6 | 5.2E-3 |  |  |
| GOTERM_BP_FAT   | purine nucleoside triphosphate metabolic process           | RT |     |      | 20     | 2.3    | 3.1E-6 | 5.2E-3 |  |  |
| GOTERM_MF_FAT   | ATPase activity, coupled to transmembrane movement of ions | RT |     |      | 20     | 2.3    | 3.5E-6 | 5.3E-3 |  |  |
| GOTERM_BP_FAT   | ribonucleotide metabolic process                           | RT | 23  | 2.6  | 3.4E-6 | 5.8E-3 |        |        |  |  |
| GOTERM_BP_FAT   | ATP metabolic process                                      | RT | 19  | 2.2  | 3.6E-6 | 6.1E-3 |        |        |  |  |
| GOTERM_BP_FAT   | ribonucleoside triphosphate metabolic process              | RT |     |      | 20     | 2.3    | 3.7E-6 | 6.3E-3 |  |  |
| GOTERM_BP_FAT   | nucleoside triphosphate metabolic process                  | RT |     |      | 20     | 2.3    | 4.4E-6 | 7.5E-3 |  |  |
| GOTERM_BP_FAT   | purine ribonucleotide metabolic process                    | RT |     |      | 22     | 2.5    | 5.8E-6 | 9.8E-3 |  |  |
| SP_PIR_KEYWORDS | transmembrane                                              | RT | 104 | 11.8 | 1.0E-5 | 1.3E-2 |        |        |  |  |
| GOTERM_MF_FAT   | inorganic cation transmembrane transporter activity        | RT |     |      | 25     | 2.8    | 2.0E-5 | 3.0E-2 |  |  |
| SP_PIR_KEYWORDS | actin-binding                                              | RT | 13  | 1.5  | 2.8E-5 | 3.7E-2 |        |        |  |  |
| GOTERM_CC_FAT   | organelle membrane                                         | RT | 63  | 7.1  | 2.9E-5 | 4.0E-2 |        |        |  |  |
| SP_PIR_KEYWORDS | nucleotide-binding                                         | RT | 78  | 8.8  | 3.4E-5 | 4.5E-2 |        |        |  |  |
| GOTERM_BP_FAT   | generation of precursor metabolites and energy             | RT |     |      | 32     | 3.6    | 3.9E-5 | 6.6E-2 |  |  |
| GOTERM_BP_FAT   | transmembrane transport                                    | RT | 21  | 2.4  | 4.1E-5 | 6.9E-2 |        |        |  |  |
| INTERPRO        | Major facilitator superfamily MFS-1                        | RT |     |      | 22     | 2.5    | 4.4E-5 | 7.1E-2 |  |  |
| SMART           | AAA                                                        | RT | 21  | 2.4  | 6.8E-5 | 8.5E-2 |        |        |  |  |

|                 |                                                                |    |    |     |        |        |        |  |
|-----------------|----------------------------------------------------------------|----|----|-----|--------|--------|--------|--|
| GOTERM_BP_FAT   | proton transport                                               | RT | 15 | 1.7 | 5.0E-5 | 8.5E-2 |        |  |
| SP_PIR_KEYWORDS | mitochondrion                                                  | RT |    | 28  | 3.2    | 7.1E-5 | 9.3E-2 |  |
| GOTERM_MF_FAT   | solute:cation symporter activity                               | RT |    | 18  | 2.0    | 6.3E-5 | 9.5E-2 |  |
| GOTERM_MF_FAT   | hydrogen-exporting ATPase activity, phosphorylative mechanism  | RT |    | 14  | 1.6    | 6.4E-5 | 9.6E-2 |  |
| GOTERM_BP_FAT   | energy coupled proton transport, down electrochemical gradient | RT |    | 14  | 1.6    | 5.7E-5 | 9.7E-2 |  |
| GOTERM_BP_FAT   | ATP synthesis coupled proton transport                         | RT |    | 14  | 1.6    | 5.7E-5 | 9.7E-2 |  |
| GOTERM_BP_FAT   | hydrogen transport                                             | RT | 15 | 1.7 | 6.1E-5 | 1.0E-1 |        |  |

\*\*\*\*\*

+D

C

-D

Functional annotation chart:

| Sublist         | Category Term                | RT | Genes | Count | %      | P-Value | FDR    |
|-----------------|------------------------------|----|-------|-------|--------|---------|--------|
| SP_PIR_KEYWORDS | alternative splicing         | RT |       | 51    | 10.7   | 2.9E-8  | 3.7E-5 |
| GOTERM_BP_FAT   | phototransduction            | RT | 13    | 2.7   | 5.3E-8 | 8.9E-5  |        |
| GOTERM_BP_FAT   | phosphate metabolic process  | RT |       | 47    | 9.8    | 1.3E-7  | 2.2E-4 |
| GOTERM_BP_FAT   | phosphorus metabolic process | RT |       | 47    | 9.8    | 1.3E-7  | 2.2E-4 |

|                 |                                    |    |    |     |        |        |        |        |  |
|-----------------|------------------------------------|----|----|-----|--------|--------|--------|--------|--|
| GOTERM_BP_FAT   | detection of light stimulus        | RT |    | 13  | 2.7    | 2.4E-7 | 4.0E-4 |        |  |
| GOTERM_BP_FAT   | detection of external stimulus     |    | RT |     | 14     | 2.9    | 2.6E-7 | 4.4E-4 |  |
| GOTERM_BP_FAT   | detection of abiotic stimulus      |    | RT |     | 13     | 2.7    | 7.2E-7 | 1.2E-3 |  |
| SP_PIR_KEYWORDS | phosphoprotein                     | RT |    | 57  | 11.9   | 1.1E-6 | 1.4E-3 |        |  |
| UP_SEQ_FEATURE  | splice variant                     | RT |    | 51  | 10.7   | 1.4E-6 | 2.0E-3 |        |  |
| GOTERM_CC_FAT   | cell projection                    | RT |    | 16  | 3.3    | 9.0E-6 | 1.2E-2 |        |  |
| GOTERM_BP_FAT   | response to radiation              |    | RT |     | 16     | 3.3    | 1.7E-5 | 2.8E-2 |  |
| GOTERM_BP_FAT   | phosphorylation                    | RT |    | 35  | 7.3    | 1.7E-5 | 2.8E-2 |        |  |
| GOTERM_BP_FAT   | response to light stimulus         | RT |    | 15  | 3.1    | 1.7E-5 | 2.9E-2 |        |  |
| SP_PIR_KEYWORDS | rna editing                        | RT |    | 9   | 1.9    | 2.3E-5 | 2.9E-2 |        |  |
| GOTERM_CC_FAT   | axon                               | RT | 8  | 1.7 | 2.7E-5 | 3.6E-2 |        |        |  |
| GOTERM_BP_FAT   | regulation of cell development     |    | RT |     | 17     | 3.6    | 2.6E-5 | 4.3E-2 |  |
| GOTERM_BP_FAT   | vesicle-mediated transport         | RT |    | 32  | 6.7    | 4.9E-5 | 8.2E-2 |        |  |
| SP_PIR_KEYWORDS | zinc                               | RT |    | 40  | 8.4    | 7.5E-5 | 9.6E-2 |        |  |
| SP_PIR_KEYWORDS | metal-binding                      | RT |    | 50  | 10.5   | 9.6E-5 | 1.2E-1 |        |  |
| GOTERM_BP_FAT   | detection of stimulus              |    | RT |     | 14     | 2.9    | 7.7E-5 | 1.3E-1 |  |
| GOTERM_BP_FAT   | protein amino acid phosphorylation | RT |    |     | 24     | 5.0    | 8.9E-5 | 1.5E-1 |  |
| SP_PIR_KEYWORDS | vision                             | RT |    | 10  | 2.1    | 1.2E-4 | 1.5E-1 |        |  |
| GOTERM_BP_FAT   | neurological system process        | RT |    | 39  | 8.2    | 1.2E-4 | 1.9E-1 |        |  |
| GOTERM_CC_FAT   | rhabdomere                         | RT |    | 7   | 1.5    | 2.1E-4 | 2.8E-1 |        |  |
| GOTERM_BP_FAT   | oogenesis                          | RT |    | 38  | 7.9    | 1.9E-4 | 3.2E-1 |        |  |

|                 |                                                  |    |    |     |        |        |        |        |
|-----------------|--------------------------------------------------|----|----|-----|--------|--------|--------|--------|
| GOTERM_CC_FAT   | extrinsic to plasma membrane                     | RT |    | 8   | 1.7    | 2.5E-4 | 3.3E-1 |        |
| GOTERM_BP_FAT   | visual perception                                | RT | 11 | 2.3 | 2.4E-4 | 3.9E-1 |        |        |
| GOTERM_BP_FAT   | female gamete generation                         | RT |    | 38  | 7.9    | 2.5E-4 | 4.1E-1 |        |
| INTERPRO        | Protein kinase, core                             | RT |    | 21  | 4.4    | 2.8E-4 | 4.2E-1 |        |
| GOTERM_MF_FAT   | protein kinase activity                          | RT |    | 25  | 5.2    | 3.0E-4 | 4.3E-1 |        |
| GOTERM_BP_FAT   | sensory perception of light stimulus             | RT |    | 11  | 2.3    | 2.7E-4 | 4.4E-1 |        |
| GOTERM_BP_FAT   | rhodopsin mediated signaling pathway             |    | RT |     | 6      | 1.3    | 2.9E-4 | 4.9E-1 |
| GOTERM_BP_FAT   | regulation of cellular protein metabolic process |    | RT |     | 15     | 3.1    | 3.2E-4 | 5.3E-1 |
| GOTERM_BP_FAT   | response to abiotic stimulus                     | RT |    | 20  | 4.2    | 3.7E-4 | 6.1E-1 |        |
| SP_PIR_KEYWORDS | kinase                                           | RT |    | 19  | 4.0    | 5.2E-4 | 6.7E-1 |        |
| GOTERM_BP_FAT   | instar larval or pupal morphogenesis             | RT |    | 27  | 5.6    | 4.9E-4 | 8.1E-1 |        |
| GOTERM_BP_FAT   | membrane invagination                            | RT |    | 22  | 4.6    | 5.9E-4 | 9.8E-1 |        |
| GOTERM_BP_FAT   | endocytosis                                      | RT |    | 22  | 4.6    | 5.9E-4 | 9.8E-1 |        |
| SP_PIR_KEYWORDS | zinc-finger                                      | RT |    | 24  | 5.0    | 7.7E-4 | 9.9E-1 |        |
| GOTERM_BP_FAT   | post-embryonic morphogenesis                     | RT |    | 27  | 5.6    | 6.3E-4 | 1.1E0  |        |

\*\*\*\*\*

+D

-D

C



Functional annotation chart:

| Sublist | Category Term   | RT                                            | Genes | Count | %   | P-Value | FDR    |
|---------|-----------------|-----------------------------------------------|-------|-------|-----|---------|--------|
|         | GOTERM_BP_FAT   | macromolecule catabolic process               | RT    | 73    | 3.6 | 4.7E-8  | 8.3E-5 |
|         | GOTERM_BP_FAT   | sensory perception of light stimulus          | RT    | 29    | 1.4 | 8.7E-8  | 1.5E-4 |
|         | GOTERM_CC_FAT   | cell fraction                                 | RT    | 39    | 1.9 | 1.3E-7  | 1.9E-4 |
|         | GOTERM_CC_FAT   | rhabdomere                                    | RT    | 16    | 0.8 | 1.5E-7  | 2.2E-4 |
|         | GOTERM_CC_FAT   | insoluble fraction                            | RT    | 38    | 1.9 | 1.9E-7  | 2.7E-4 |
|         | GOTERM_BP_FAT   | detection of external stimulus                | RT    | 26    | 1.3 | 1.8E-7  | 3.1E-4 |
|         | GOTERM_CC_FAT   | chromosome                                    | RT    | 77    | 3.8 | 2.5E-7  | 3.5E-4 |
|         | GOTERM_BP_FAT   | visual perception                             | RT    | 28    | 1.4 | 2.5E-7  | 4.4E-4 |
|         | GOTERM_BP_FAT   | detection of light stimulus                   | RT    | 23    | 1.1 | 3.3E-7  | 5.8E-4 |
|         | GOTERM_BP_FAT   | detection of abiotic stimulus                 | RT    | 24    | 1.2 | 5.3E-7  | 9.2E-4 |
|         | GOTERM_CC_FAT   | membrane fraction                             | RT    | 36    | 1.8 | 6.9E-7  | 9.8E-4 |
|         | SP_PIR_KEYWORDS | phosphoprotein                                | RT    | 173   | 8.5 | 1.2E-6  | 1.6E-3 |
|         | SP_PIR_KEYWORDS | metal-binding                                 | RT    | 169   | 8.3 | 1.6E-6  | 2.1E-3 |
|         | GOTERM_CC_FAT   | extrinsic to membrane                         | RT    | 45    | 2.2 | 2.5E-6  | 3.5E-3 |
|         | GOTERM_BP_FAT   | regulation of cell cycle                      | RT    | 47    | 2.3 | 2.0E-6  | 3.5E-3 |
|         | GOTERM_BP_FAT   | transcription from RNA polymerase II promoter | RT    | 33    | 1.6 | 2.1E-6  | 3.7E-3 |
|         | GOTERM_BP_FAT   | chromosome organization                       | RT    | 69    | 3.4 | 2.2E-6  | 3.9E-3 |

|                 |                                                            |    |     |     |        |        |        |     |        |        |
|-----------------|------------------------------------------------------------|----|-----|-----|--------|--------|--------|-----|--------|--------|
| GOTERM_BP_FAT   | phototransduction                                          | RT | 20  | 1.0 | 3.1E-6 | 5.5E-3 |        |     |        |        |
| GOTERM_CC_FAT   | nucleoplasm                                                | RT | 66  | 3.3 | 4.0E-6 | 5.7E-3 |        |     |        |        |
| GOTERM_BP_FAT   | modification-dependent protein catabolic process           | RT |     |     |        |        | 47     | 2.3 | 3.4E-6 | 6.0E-3 |
| GOTERM_BP_FAT   | protein localization                                       | RT |     | 88  | 4.3    | 3.5E-6 | 6.2E-3 |     |        |        |
| GOTERM_BP_FAT   | modification-dependent macromolecule catabolic process     | RT |     |     |        |        | 47     | 2.3 | 4.1E-6 | 7.1E-3 |
| GOTERM_BP_FAT   | cellular macromolecule catabolic process                   | RT |     |     |        |        | 57     | 2.8 | 6.4E-6 | 1.1E-2 |
| GOTERM_BP_FAT   | detection of light stimulus involved in sensory perception | RT |     |     |        |        | 13     | 0.6 | 8.5E-6 | 1.5E-2 |
| GOTERM_MF_FAT   | general RNA polymerase II transcription factor activity    | RT |     |     |        |        | 31     | 1.5 | 9.5E-6 | 1.5E-2 |
| GOTERM_BP_FAT   | intracellular signaling cascade                            | RT |     | 69  | 3.4    | 1.5E-5 | 2.6E-2 |     |        |        |
| GOTERM_BP_FAT   | proteolysis involved in cellular protein catabolic process | RT |     |     |        |        | 48     | 2.4 | 1.5E-5 | 2.6E-2 |
| GOTERM_BP_FAT   | cellular protein catabolic process                         | RT |     | 48  | 2.4    | 1.5E-5 | 2.6E-2 |     |        |        |
| INTERPRO        | Snf7                                                       | RT | 8   | 0.4 | 1.6E-5 | 2.8E-2 |        |     |        |        |
| GOTERM_BP_FAT   | macromolecular complex subunit organization                | RT |     |     |        |        | 66     | 3.3 | 1.6E-5 | 2.8E-2 |
| GOTERM_BP_FAT   | protein catabolic process                                  | RT |     | 51  | 2.5    | 1.8E-5 | 3.1E-2 |     |        |        |
| GOTERM_CC_FAT   | nucleoplasm part                                           | RT | 59  | 2.9 | 2.2E-5 | 3.1E-2 |        |     |        |        |
| SP_PIR_KEYWORDS | vision                                                     | RT | 22  | 1.1 | 2.3E-5 | 3.2E-2 |        |     |        |        |
| GOTERM_CC_FAT   | microsome                                                  | RT | 29  | 1.4 | 2.5E-5 | 3.6E-2 |        |     |        |        |
| GOTERM_CC_FAT   | vesicular fraction                                         | RT | 29  | 1.4 | 2.5E-5 | 3.6E-2 |        |     |        |        |
| SP_PIR_KEYWORDS | nucleus                                                    | RT | 175 | 8.6 | 2.7E-5 | 3.7E-2 |        |     |        |        |
| INTERPRO        | Cytochrome P450, C-terminal region                         | RT |     |     |        |        | 30     | 1.5 | 2.3E-5 | 3.8E-2 |
| GOTERM_BP_FAT   | establishment of protein localization                      | RT |     | 66  | 3.3    | 2.6E-5 | 4.5E-2 |     |        |        |

|                 |                                                               |    |     |      |        |        |        |        |  |
|-----------------|---------------------------------------------------------------|----|-----|------|--------|--------|--------|--------|--|
| INTERPRO        | Cytochrome P450                                               | RT | 30  | 1.5  | 2.9E-5 | 4.9E-2 |        |        |  |
| GOTERM_CC_FAT   | spindle                                                       | RT | 24  | 1.2  | 3.7E-5 | 5.3E-2 |        |        |  |
| SP_PIR_KEYWORDS | zinc-finger                                                   | RT | 75  | 3.7  | 4.0E-5 | 5.4E-2 |        |        |  |
| COG_ONTOLOGY    | Secondary metabolites biosynthesis, transport, and catabolism |    |     | RT   | 32     | 1.6    | 6.2E-5 | 5.6E-2 |  |
| GOTERM_BP_FAT   | phosphate metabolic process                                   | RT | 111 | 5.5  | 3.2E-5 | 5.7E-2 |        |        |  |
| GOTERM_BP_FAT   | phosphorus metabolic process                                  | RT | 111 | 5.5  | 3.2E-5 | 5.7E-2 |        |        |  |
| SP_PIR_KEYWORDS | microsome                                                     | RT | 27  | 1.3  | 4.3E-5 | 5.9E-2 |        |        |  |
| GOTERM_BP_FAT   | detection of light stimulus involved in visual perception     |    |     | RT   | 12     | 0.6    | 3.4E-5 | 5.9E-2 |  |
| GOTERM_BP_FAT   | transcription initiation from RNA polymerase II promoter      |    |     | RT   | 23     | 1.1    | 3.7E-5 | 6.5E-2 |  |
| GOTERM_MF_FAT   | transition metal ion binding                                  | RT | 255 | 12.6 | 4.3E-5 | 6.8E-2 |        |        |  |
| GOTERM_BP_FAT   | protein transport                                             | RT | 64  | 3.2  | 4.2E-5 | 7.4E-2 |        |        |  |
| UP_SEQ_FEATURE  | metal ion-binding site:Iron (heme axial ligand)               |    | RT  | 34   | 1.7    | 4.8E-5 | 7.8E-2 |        |  |
| SP_PIR_KEYWORDS | chromosomal protein                                           | RT | 18  | 0.9  | 5.8E-5 | 7.9E-2 |        |        |  |
| GOTERM_BP_FAT   | detection of visible light                                    | RT | 13  | 0.6  | 4.5E-5 | 8.0E-2 |        |        |  |
| SP_PIR_KEYWORDS | heme                                                          | RT | 34  | 1.7  | 6.1E-5 | 8.3E-2 |        |        |  |
| GOTERM_BP_FAT   | macromolecular complex assembly                               |    | RT  | 58   | 2.9    | 5.0E-5 | 8.8E-2 |        |  |
| SP_PIR_KEYWORDS | Monooxygenase                                                 | RT | 31  | 1.5  | 7.1E-5 | 9.7E-2 |        |        |  |

File S4

Lists of functional terms common and exclusive to each of the expression patterns shown in Figure 9

\*\*\*\*\*

Common and exclusive to all down regulated protective

- [1,] "GOTERM\_BP\_FAT " "energy derivation by oxidation of organic compounds "
- [2,] "GOTERM\_BP\_FAT " "cellular respiration "
- [3,] "GOTERM\_CC\_FAT " "respiratory chain "
- [4,] "GOTERM\_BP\_FAT " "electron transport chain "
- [5,] "GOTERM\_CC\_FAT " "mitochondrial respiratory chain "
- [6,] "GOTERM\_BP\_FAT " "respiratory electron transport chain "
- [7,] "GOTERM\_BP\_FAT " "ATP synthesis coupled electron transport "
- [8,] "GOTERM\_BP\_FAT " "mitochondrial ATP synthesis coupled electron transport "
- [9,] "GOTERM\_CC\_FAT " "mitochondrial membrane part "
- [10,] "GOTERM\_BP\_FAT " "mitochondrial electron transport, NADH to ubiquinone "
- [11,] "GOTERM\_CC\_FAT " "NADH dehydrogenase complex "
- [12,] "GOTERM\_CC\_FAT " "respiratory chain complex I "
- [13,] "GOTERM\_CC\_FAT " "mitochondrial respiratory chain complex I "
- [14,] "GOTERM\_MF\_FAT " "NADH dehydrogenase activity "
- [15,] "GOTERM\_MF\_FAT " "oxidoreductase activity, acting on NADH or NADPH "

- [16,] "GOTERM\_MF\_FAT " "NADH dehydrogenase (quinone) activity "
- [17,] "GOTERM\_MF\_FAT " "NADH dehydrogenase (ubiquinone) activity "
- [18,] "GOTERM\_MF\_FAT " "oxidoreductase activity, acting on NADH or NADPH, quinone or similar compound as acceptor "
- [19,] "GOTERM\_BP\_FAT " "cofactor catabolic process "
- [20,] "GOTERM\_BP\_FAT " "acetyl-CoA metabolic process "
- [21,] "GOTERM\_BP\_FAT " "tricarboxylic acid cycle "
- [22,] "GOTERM\_BP\_FAT " "acetyl-CoA catabolic process "
- [23,] "GOTERM\_BP\_FAT " "coenzyme catabolic process "
- [24,] "GOTERM\_BP\_FAT " "aerobic respiration "
- [25,] "GOTERM\_CC\_FAT " "proton-transporting ATP synthase complex "
- [26,] "GOTERM\_CC\_FAT " "mitochondrial proton-transporting ATP synthase complex "
- [27,] "GOTERM\_CC\_FAT " "proton-transporting ATP synthase complex, coupling factor F(o) "
- [28,] "GOTERM\_CC\_FAT " "mitochondrial proton-transporting ATP synthase complex, coupling factor F(o) "
- [29,] "GOTERM\_BP\_FAT " "glucose metabolic process "
- [30,] "GOTERM\_BP\_FAT " "hexose metabolic process "
- [31,] "GOTERM\_BP\_FAT " "glycolysis "
- [32,] "GOTERM\_BP\_FAT " "cellular carbohydrate catabolic process "
- [33,] "GOTERM\_BP\_FAT " "monosaccharide metabolic process "
- [34,] "GOTERM\_BP\_FAT " "carbohydrate catabolic process "
- [35,] "GOTERM\_BP\_FAT " "hexose catabolic process "
- [36,] "GOTERM\_BP\_FAT " "glucose catabolic process "

[37,] "GOTERM\_BP\_FAT " "alcohol catabolic process "

[38,] "GOTERM\_BP\_FAT " "monosaccharide catabolic process "

[39,] "GOTERM\_BP\_FAT " "regulation of cellular component size "

[40,] "GOTERM\_BP\_FAT " "cell growth "

[41,] "GOTERM\_BP\_FAT " "regulation of cell size "

[42,] "GOTERM\_BP\_FAT " "growth "

[43,] "GOTERM\_BP\_FAT " "developmental growth "

[44,] "GOTERM\_BP\_FAT " "developmental cell growth "

[45,] "GOTERM\_BP\_FAT " "protein amino acid phosphorylation "

[46,] "INTERPRO " "Protein kinase, ATP binding site "

[47,] "GOTERM\_MF\_FAT " "protein serine/threonine kinase activity "

[48,] "SMART " "S\_TKc "

[49,] "INTERPRO " "Serine/threonine protein kinase "

[50,] "SP\_PIR\_KEYWORDS " "kinase "

[51,] "SP\_PIR\_KEYWORDS " "serine/threonine-protein kinase "

[52,] "INTERPRO " "Serine/threonine protein kinase-related "

[53,] "GOTERM\_MF\_FAT " "protein kinase activity "

[54,] "INTERPRO " "Protein kinase, core "

[55,] "INTERPRO " "Serine/threonine protein kinase, active site "

[56,] "SP\_PIR\_KEYWORDS " "atp synthesis "

[57,] "GOTERM\_CC\_FAT " "mitochondrial proton-transporting ATP synthase complex, catalytic core F(1) "

[58,] "GOTERM\_CC\_FAT " "proton-transporting ATP synthase complex, catalytic core F(1) "

[59,] "SMART " "EGF "

[60,] "INTERPRO " "EGF-like "

[61,] "INTERPRO " "EGF-like, type 3 "

[62,] "SP\_PIR\_KEYWORDS " "egf-like domain "

[63,] "GOTERM\_BP\_FAT " "olfactory learning "

[64,] "GOTERM\_BP\_FAT " "learning or memory "

[65,] "GOTERM\_BP\_FAT " "chemosensory behavior "

[66,] "GOTERM\_BP\_FAT " "learning "

[67,] "GOTERM\_BP\_FAT " "olfactory behavior "

[68,] "GOTERM\_BP\_FAT " "circadian rhythm "

[69,] "GOTERM\_BP\_FAT " "rhythmic process "

[70,] "GOTERM\_BP\_FAT " "circadian behavior "

[71,] "GOTERM\_BP\_FAT " "rhythmic behavior "

[72,] "GOTERM\_BP\_FAT " "locomotor rhythm "

[73,] "GOTERM\_BP\_FAT " "epithelial tube morphogenesis "

[74,] "INTERPRO " "Pleckstrin homology-type "

[75,] "GOTERM\_BP\_FAT " "chitin-based embryonic cuticle biosynthetic process "

[76,] "GOTERM\_BP\_FAT " "cuticle development "

[77,] "GOTERM\_BP\_FAT " "chitin-based cuticle development "

[78,] "GOTERM\_BP\_FAT " "organic acid catabolic process "

[79,] "GOTERM\_BP\_FAT " "carboxylic acid catabolic process "

\*\*\*\*\*

Common and exclusive to all up regulated protective

[1,] "GOTERM\_MF\_FAT " "RNA polymerase activity "

[2,] "GOTERM\_MF\_FAT " "DNA-directed RNA polymerase activity "

[3,] "GOTERM\_CC\_FAT " "RNA polymerase complex "

[4,] "GOTERM\_CC\_FAT " "DNA-directed RNA polymerase complex "

[5,] "GOTERM\_CC\_FAT " "nuclear DNA-directed RNA polymerase complex "

[6,] "GOTERM\_MF\_FAT " "nucleotidyltransferase activity "

[7,] "KEGG\_PATHWAY " "RNA polymerase "

[8,] "GOTERM\_CC\_FAT " "DNA-directed RNA polymerase II, core complex "

[9,] "SP\_PIR\_KEYWORDS " "nucleotidyltransferase "

[10,] "KEGG\_PATHWAY " "Pyrimidine metabolism "

[11,] "KEGG\_PATHWAY " "Purine metabolism "

[12,] "SMART " "Sm "

[13,] "INTERPRO " "Like-Sm ribonucleoprotein, eukaryotic and archaea-type, core "

[14,] "INTERPRO " "Like-Sm ribonucleoprotein, core "

\*\*\*\*\*



Common and exclusive to all down regulated non-protective

None

\*\*\*\*\*

Common and exclusive to all up regulated non-protective

None

\*\*\*\*\*

Common and exclusive to all protective

None

\*\*\*\*\*

Common and exclusive to all non-protective

None

\*\*\*\*\*

Common and exclusive to all down regulated

- [1,] "GOTERM\_MF\_FAT " "ATPase activity "
- [2,] "GOTERM\_CC\_FAT " "mitochondrial part "
- [3,] "GOTERM\_CC\_FAT " "mitochondrion "
- [4,] "GOTERM\_MF\_FAT " "ATPase activity, coupled to transmembrane movement of substances "
- [5,] "GOTERM\_MF\_FAT " "ATPase activity, coupled to movement of substances "
- [6,] "GOTERM\_MF\_FAT " "hydrolase activity, acting on acid anhydrides, catalyzing transmembrane movement of substances "
- [7,] "GOTERM\_MF\_FAT " "P-P-bond-hydrolysis-driven transmembrane transporter activity "
- [8,] "GOTERM\_MF\_FAT " "primary active transmembrane transporter activity "
- [9,] "GOTERM\_BP\_FAT " "ribonucleotide biosynthetic process "
- [10,] "GOTERM\_BP\_FAT " "purine nucleoside triphosphate biosynthetic process "
- [11,] "GOTERM\_BP\_FAT " "purine ribonucleoside triphosphate biosynthetic process "
- [12,] "GOTERM\_BP\_FAT " "ribonucleotide metabolic process "
- [13,] "GOTERM\_BP\_FAT " "purine ribonucleotide biosynthetic process "
- [14,] "GOTERM\_BP\_FAT " "nucleoside triphosphate biosynthetic process "
- [15,] "GOTERM\_BP\_FAT " "ribonucleoside triphosphate biosynthetic process "
- [16,] "GOTERM\_MF\_FAT " "ATPase activity, coupled to transmembrane movement of ions, phosphorylative mechanism "
- [17,] "GOTERM\_BP\_FAT " "cation transport "
- [18,] "GOTERM\_BP\_FAT " "purine ribonucleotide metabolic process "
- [19,] "GOTERM\_BP\_FAT " "purine nucleoside triphosphate metabolic process "
- [20,] "GOTERM\_BP\_FAT " "purine ribonucleoside triphosphate metabolic process "

- [21,] "GOTERM\_BP\_FAT " "ATP biosynthetic process "
- [22,] "SP\_PIR\_KEYWORDS " "Hydrogen ion transport "
- [23,] "GOTERM\_BP\_FAT " "ribonucleoside triphosphate metabolic process "
- [24,] "GOTERM\_BP\_FAT " "nucleoside triphosphate metabolic process "
- [25,] "GOTERM\_MF\_FAT " "ATPase activity, coupled to transmembrane movement of ions "
- [26,] "GOTERM\_BP\_FAT " "ATP metabolic process "
- [27,] "GOTERM\_BP\_FAT " "ion transport "
- [28,] "GOTERM\_BP\_FAT " "purine nucleotide biosynthetic process "
- [29,] "GOTERM\_MF\_FAT " "ATPase activity, coupled "
- [30,] "GOTERM\_BP\_FAT " "purine nucleotide metabolic process "
- [31,] "GOTERM\_MF\_FAT " "hydrogen-exporting ATPase activity, phosphorylative mechanism "
- [32,] "GOTERM\_BP\_FAT " "nucleobase, nucleoside, nucleotide and nucleic acid biosynthetic process "
- [33,] "GOTERM\_BP\_FAT " "nucleobase, nucleoside and nucleotide biosynthetic process "
- [34,] "GOTERM\_BP\_FAT " "monovalent inorganic cation transport "
- [35,] "GOTERM\_BP\_FAT " "nucleotide biosynthetic process "
- [36,] "GOTERM\_BP\_FAT " "proton transport "
- [37,] "GOTERM\_BP\_FAT " "hydrogen transport "
- [38,] "GOTERM\_BP\_FAT " "ATP synthesis coupled proton transport "
- [39,] "GOTERM\_BP\_FAT " "energy coupled proton transport, down electrochemical gradient "
- [40,] "GOTERM\_BP\_FAT " "ion transmembrane transport "
- [41,] "GOTERM\_MF\_FAT " "inorganic cation transmembrane transporter activity "

- [42,] "GOTERM\_CC\_FAT " "proton-transporting two-sector ATPase complex "
- [43,] "GOTERM\_CC\_FAT " "proton-transporting two-sector ATPase complex, catalytic domain "
- [44,] "GOTERM\_MF\_FAT " "monovalent inorganic cation transmembrane transporter activity "
- [45,] "GOTERM\_MF\_FAT " "hydrogen ion transmembrane transporter activity "
- [46,] "GOTERM\_BP\_FAT " "transmembrane transport "
- [47,] "KEGG\_PATHWAY " "Oxidative phosphorylation "
- [48,] "GOTERM\_BP\_FAT " "oxidative phosphorylation "
- [49,] "GOTERM\_CC\_FAT " "proton-transporting two-sector ATPase complex, proton-transporting domain "

\*\*\*\*\*

Common and exclusive to all up regulated

- [1,] "GOTERM\_CC\_FAT " "nucleoplasm part "
- [2,] "GOTERM\_BP\_FAT " "transcription from RNA polymerase II promoter "
- [3,] "GOTERM\_BP\_FAT " "transcription, DNA-dependent "
- [4,] "GOTERM\_BP\_FAT " "RNA biosynthetic process "
- [5,] "GOTERM\_CC\_FAT " "nucleoplasm "
- [6,] "GOTERM\_CC\_FAT " "DNA-directed RNA polymerase II, holoenzyme "
- [7,] "GOTERM\_BP\_FAT " "transcription "
- [8,] "GOTERM\_CC\_FAT " "nuclear lumen "
