# Supplementary material
Source: PubMed Central journal article supplement (PMC3430533)
Supplement: supp_112.142687_FigureS2.pdf [file supp_112.142687_FigureS2.pdf]

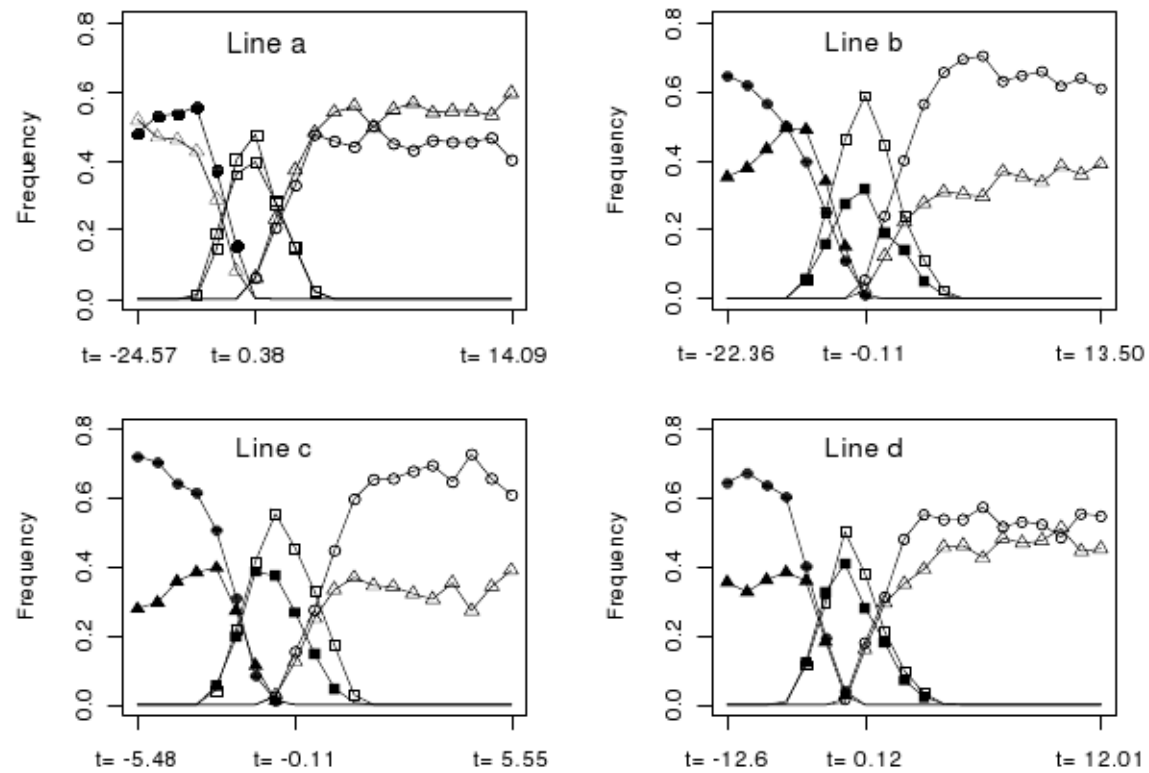

**Figure S2** Relative frequencies of probe sets in each of the gene expression profiles shown in Figure 5 of the main text for each inbred line. We ranked the 9133 expressed probe sets according to their Student's  $t$  value in the inbreds vs. control test, and divided the rank in 20 tiers of size 456 (except the last one, of size 469). Thus, the right-hand part of the figure includes probes up-regulated with inbreeding, and those in the left-hand side are probes down-regulated with inbreeding.
