# Supplementary material
Source: PubMed Central journal article supplement (PMC3430533)
Supplement: supp_112.142687_FileS1.pdf [file supp_112.142687_FileS1.pdf]

File S1

Lists of probe sets showing (FDR<0.1) *Inb*, *Lin*, *Dep* and *Lin x Dep* effects

\*\*\*\*\*

**Inb Effects UP regulated FDR < 0.1**

|            |              |              |              |              |              |
|------------|--------------|--------------|--------------|--------------|--------------|
| 1635494_at | 1625828_at   | 1629101_a_at | 1633357_at   | 1623191_at   | 1628376_x_at |
| 1633048_at | 1636885_at   | 1639914_at   | 1624079_a_at | 1626789_at   | 1633410_at   |
| 1627088_at | 1638742_at   | 1637390_at   | 1641434_at   | 1631099_at   | 1631173_at   |
| 1631523_at | 1640979_at   | 1638827_at   | 1623327_at   | 1639528_at   | 1635848_at   |
| 1623935_at | 1634935_a_at | 1639262_at   | 1640221_at   | 1634551_at   | 1625125_at   |
| 1638090_at | 1640144_at   | 1628020_at   | 1632908_s_at | 1627631_s_at | 1633613_at   |
| 1624914_at | 1629014_s_at | 1628657_at   | 1633005_at   | 1628006_at   | 1635318_at   |
| 1633844_at | 1623018_at   | 1633586_at   | 1623866_at   | 1635088_at   | 1639188_at   |
| 1629050_at | 1640157_at   | 1641502_a_at | 1631290_at   | 1626699_at   | 1625503_at   |
| 1637290_at | 1623900_a_at | 1636764_at   | 1634529_at   | 1628814_s_at | 1634207_at   |
| 1628639_at | 1630516_at   | 1631246_at   | 1633363_at   | 1638166_at   | 1631876_at   |
| 1640956_at | 1623521_at   | 1632259_at   | 1635251_at   | 1629205_at   | 1634687_at   |
| 1635008_at | 1626266_at   | 1638887_a_at | 1623355_at   | 1640230_at   | 1625367_at   |
| 1630761_at | 1627312_at   | 1636856_at   | 1637567_at   | 1632298_s_at | 1628599_at   |
| 1627529_at | 1627667_at   | 1639108_at   | 1629061_s_at | 1623335_a_at | 1639932_at   |
| 1627419_at | 1634243_a_at | 1626605_at   | 1629771_at   | 1636660_at   | 1636108_at   |

|              |            |              |              |              |              |
|--------------|------------|--------------|--------------|--------------|--------------|
| 1625315_at   | 1625763_at | 1638193_at   | 1628884_at   | 1638167_at   | 1627117_a_at |
| 1637063_at   | 1636526_at | 1623659_at   | 1631813_at   | 1632067_at   | 1637291_at   |
| 1636888_a_at | 1630975_at | 1623250_at   | 1636842_at   | 1639397_at   | 1638481_at   |
| 1637754_at   | 1628338_at | 1629220_at   | 1627773_a_at | 1634731_at   | 1640400_at   |
| 1630795_at   | 1641491_at | 1638164_at   | 1631837_at   | 1638630_at   | 1635649_at   |
| 1629977_at   | 1630831_at | 1632274_at   | 1628505_at   | 1630845_at   | 1623298_at   |
| 1628831_at   | 1632452_at | 1630574_at   | 1631816_at   | 1634157_at   | 1636220_at   |
| 1636482_at   | 1639563_at | 1634384_at   | 1634180_s_at | 1627595_at   | 1627380_at   |
| 1639981_at   | 1640950_at | 1639048_a_at | 1637462_at   | 1629662_at   | 1635945_at   |
| 1638585_at   | 1637667_at | 1641123_at   | 1630808_at   | 1627062_s_at | 1625634_at   |
| 1637160_at   | 1639401_at | 1624130_at   | 1641259_at   | 1637432_at   | 1637940_s_at |
| 1635935_at   | 1628271_at | 1632396_at   | 1629222_at   | 1629942_at   | 1624057_at   |
| 1626051_at   | 1635183_at | 1625410_at   | 1636705_at   | 1631775_at   | 1627327_at   |
| 1628719_at   | 1635030_at | 1623599_at   | 1641513_at   | 1627590_at   | 1626263_at   |
| 1632007_at   | 1633283_at | 1640356_a_at | 1638161_at   | 1639850_at   | 1641234_at   |
| 1627489_a_at | 1630299_at | 1636343_at   | 1634854_at   | 1628567_at   | 1627664_a_at |
| 1638654_at   | 1640158_at | 1636950_at   | 1633549_s_at | 1623194_at   | 1634817_at   |
| 1637367_at   | 1641567_at | 1630049_at   | 1624986_at   | 1633639_at   | 1623989_at   |
| 1623675_at   | 1641718_at | 1627124_at   | 1634664_at   | 1636929_at   | 1631719_at   |
| 1628969_s_at | 1627119_at | 1636804_at   | 1632917_at   | 1638256_at   | 1636131_at   |
| 1640520_at   | 1640424_at | 1624354_at   | 1640689_a_at | 1632689_at   | 1623076_at   |

|            |              |              |              |              |              |
|------------|--------------|--------------|--------------|--------------|--------------|
| 1641552_at | 1635137_a_at | 1625260_at   | 1634849_at   | 1637224_at   | 1633961_s_at |
| 1627634_at | 1630557_at   | 1638038_at   | 1631660_at   | 1626203_at   | 1623453_at   |
| 1641584_at | 1637300_at   | 1632721_at   | 1632958_a_at | 1635098_a_at | 1633861_at   |
| 1635744_at | 1627465_at   | 1638516_s_at | 1632515_a_at | 1624152_at   | 1638774_at   |
| 1631381_at | 1640161_at   | 1623481_at   | 1638342_at   | 1630214_a_at | 1631827_at   |
| 1632490_at | 1628514_at   | 1639052_a_at | 1627817_at   | 1625840_at   | 1637717_at   |
| 1623105_at | 1636420_at   | 1635530_at   | 1628611_at   | 1631351_s_at | 1625058_at   |
| 1625962_at | 1640249_at   | 1627027_at   | 1638455_at   | 1634055_at   | 1634569_at   |
| 1631729_at | 1635506_at   | 1624090_at   | 1632391_at   | 1631787_at   | 1637571_at   |
| 1623430_at | 1632752_at   | 1625430_at   | 1627399_at   | 1640194_a_at | 1641108_at   |
| 1631674_at | 1635086_at   | 1627609_at   | 1628610_at   | 1627782_at   | 1624468_a_at |
| 1627330_at | 1631390_at   | 1628572_s_at | 1623906_at   | 1625963_at   | 1626557_at   |
| 1628446_at | 1640103_s_at | 1636129_s_at | 1630797_at   | 1623384_at   | 1626350_at   |
| 1628560_at | 1637799_at   | 1629518_at   | 1639273_s_at | 1638233_at   | 1639046_at   |
| 1626785_at | 1628883_at   | 1640056_at   | 1627939_a_at | 1632828_at   | 1634449_at   |
| 1636912_at | 1624074_at   | 1641137_at   | 1636174_at   | 1630640_at   | 1624935_at   |
| 1641454_at | 1641371_at   | 1634542_at   | 1636486_at   | 1626909_at   | 1640748_at   |
| 1627897_at | 1631493_at   | 1641373_at   | 1630528_at   | 1628806_at   | 1635608_at   |
| 1631212_at | 1634436_at   | 1627002_at   | 1624186_at   | 1625477_a_at | 1625512_s_at |
| 1641201_at | 1635542_at   | 1624263_at   | 1632540_at   | 1632551_at   | 1626366_at   |
| 1634591_at | 1635283_at   | 1633812_at   | 1625231_at   | 1631541_at   | 1637797_at   |

|              |              |              |              |              |              |
|--------------|--------------|--------------|--------------|--------------|--------------|
| 1625338_at   | 1630375_at   | 1626831_at   | 1640977_at   | 1630763_at   | 1638036_at   |
| 1626240_s_at | 1636407_at   | 1630750_at   | 1634583_s_at | 1635356_at   | 1633381_at   |
| 1635151_at   | 1640906_at   | 1627087_at   | 1634647_at   | 1636217_at   | 1631228_a_at |
| 1624180_at   | 1633730_at   | 1630057_at   | 1637084_at   | 1628714_at   | 1629209_at   |
| 1636255_s_at | 1637485_at   | 1634507_s_at | 1640746_at   | 1635365_at   | 1639170_at   |
| 1636694_at   | 1634940_at   | 1627495_at   | 1641160_s_at | 1629756_at   | 1641168_s_at |
| 1640246_at   | 1641084_at   | 1640066_at   | 1623239_at   | 1635875_at   | 1625002_a_at |
| 1634552_at   | 1627822_at   | 1629620_s_at | 1633292_a_at | 1625147_at   | 1634575_at   |
| 1625466_at   | 1630170_at   | 1637262_at   | 1631817_a_at | 1638884_at   | 1632142_at   |
| 1641479_at   | 1626173_at   | 1626724_at   | 1640653_at   | 1629309_at   | 1640884_at   |
| 1634077_at   | 1632212_at   | 1624032_at   | 1631127_at   | 1633958_at   | 1640458_at   |
| 1629578_at   | 1633951_at   | 1638576_at   | 1628986_at   | 1630619_at   | 1640399_at   |
| 1631479_at   | 1632683_s_at | 1638468_at   | 1634909_at   | 1629432_at   | 1641654_a_at |
| 1631472_at   | 1630503_at   | 1634779_at   | 1632630_at   | 1628041_a_at | 1627068_at   |
| 1630006_at   | 1631971_at   | 1634208_a_at | 1628272_a_at | 1637249_at   | 1627464_at   |
| 1636491_at   | 1625764_at   | 1636488_at   | 1626568_at   | 1641428_at   | 1636508_at   |
| 1623793_at   | 1629375_at   | 1632565_at   | 1635712_at   | 1631749_at   | 1632343_at   |
| 1638724_at   | 1634107_at   | 1623045_at   | 1635637_at   | 1623702_at   | 1634257_at   |
| 1640440_at   | 1641071_at   | 1623244_at   | 1626653_a_at | 1638248_at   | 1637164_at   |
| 1625680_a_at | 1625837_at   | 1628103_at   | 1636153_at   | 1630208_at   | 1635968_at   |
| 1640963_at   | 1631017_at   | 1636246_a_at | 1639857_at   | 1628682_at   | 1640006_at   |

|              |              |              |              |              |              |
|--------------|--------------|--------------|--------------|--------------|--------------|
| 1635892_at   | 1623643_s_at | 1634070_at   | 1635049_at   | 1633382_s_at | 1626401_at   |
| 1628161_at   | 1639415_at   | 1635130_a_at | 1634594_at   | 1641116_at   | 1628264_a_at |
| 1626180_at   | 1637470_at   | 1624150_at   | 1626986_at   | 1640480_at   | 1625565_at   |
| 1638070_at   | 1626783_at   | 1623268_a_at | 1632370_at   | 1639153_at   | 1630805_at   |
| 1638179_at   | 1638830_at   | 1629733_at   | 1637776_at   | 1627060_s_at | 1638680_at   |
| 1640101_at   | 1632089_at   | 1624668_s_at | 1635450_a_at | 1638297_at   | 1625276_a_at |
| 1638970_at   | 1632438_at   | 1625169_at   | 1635344_at   | 1623425_at   | 1636273_at   |
| 1628175_at   | 1630467_a_at | 1641357_at   | 1638414_a_at | 1632504_at   | 1625257_s_at |
| 1628818_at   | 1631684_at   | 1625589_at   | 1641288_at   | 1626328_at   | 1631171_at   |
| 1632984_s_at | 1623546_at   | 1635343_a_at | 1624113_at   | 1635593_at   | 1641455_at   |
| 1639357_at   | 1633857_at   | 1626414_at   | 1631533_at   | 1634412_at   | 1623704_at   |
| 1641420_s_at | 1633675_at   | 1627377_at   | 1629270_at   | 1626811_at   | 1633023_at   |
| 1635981_a_at | 1639731_at   | 1636611_at   | 1625792_s_at | 1629158_at   | 1635796_a_at |
| 1635931_at   | 1632772_at   | 1626499_at   | 1641430_at   | 1637053_at   | 1638938_at   |
| 1641529_s_at | 1633915_at   | 1639359_at   | 1635437_at   | 1640700_at   | 1633054_at   |
| 1635028_s_at | 1638120_at   | 1630398_at   | 1628924_a_at | 1641498_at   | 1630410_at   |
| 1637265_at   | 1632389_at   | 1626345_at   | 1625573_at   | 1625426_at   | 1633523_at   |
| 1628088_at   | 1628784_at   | 1624292_a_at | 1631604_at   | 1623733_at   | 1638157_at   |
| 1628785_at   | 1623852_at   | 1640315_at   | 1635223_at   | 1629036_at   | 1624484_a_at |
| 1638763_at   | 1638305_at   | 1641714_at   | 1637955_a_at | 1641268_at   | 1640138_at   |
| 1632222_a_at | 1626883_at   | 1626929_at   | 1640329_s_at | 1628483_at   | 1641280_at   |

|              |              |              |              |              |              |
|--------------|--------------|--------------|--------------|--------------|--------------|
| 1622965_s_at | 1632111_at   | 1631149_s_at | 1629136_at   | 1630344_at   | 1640078_at   |
| 1638237_at   | 1641196_at   | 1625268_at   | 1631227_at   | 1626324_at   | 1627449_at   |
| 1629718_at   | 1638981_at   | 1632087_at   | 1629221_at   | 1624656_s_at | 1631784_at   |
| 1638265_s_at | 1638238_at   | 1625387_s_at | 1637773_s_at | 1630754_at   | 1632954_at   |
| 1632813_at   | 1632263_at   | 1637226_at   | 1636550_at   | 1622935_at   | 1633082_at   |
| 1638889_at   | 1625849_at   | 1637727_at   | 1634560_at   | 1623564_at   | 1625363_at   |
| 1632923_at   | 1640666_at   | 1636451_a_at | 1635840_s_at | 1633566_at   | 1635342_at   |
| 1631766_at   | 1637332_at   | 1635836_at   | 1631509_a_at | 1633031_at   | 1630993_at   |
| 1636773_a_at | 1624260_at   | 1635299_at   | 1633247_at   | 1632433_at   | 1625480_at   |
| 1627845_at   | 1635603_at   | 1631821_at   | 1638765_at   | 1633743_at   | 1627666_at   |
| 1634193_at   | 1627031_at   | 1632711_at   | 1624423_at   | 1625833_at   | 1627393_at   |
| 1629868_s_at | 1631115_at   | 1635203_at   | 1637605_s_at | 1635915_at   | 1635126_a_at |
| 1624364_at   | 1640346_at   | 1639349_at   | 1631191_at   | 1633430_at   | 1624271_at   |
| 1636606_at   | 1638549_at   | 1640147_at   | 1634563_at   | 1630820_at   | 1640069_at   |
| 1623154_a_at | 1623478_at   | 1640263_at   | 1637444_s_at | 1640944_at   | 1629537_s_at |
| 1636740_at   | 1638312_at   | 1641741_a_at | 1637299_s_at | 1624390_a_at | 1640236_at   |
| 1624482_at   | 1625598_at   | 1634697_at   | 1625165_at   | 1629777_at   | 1632313_at   |
| 1641699_at   | 1636769_at   | 1629759_at   | 1641369_at   | 1633822_at   | 1625244_at   |
| 1640289_a_at | 1639205_s_at | 1637752_a_at | 1626552_at   | 1622948_at   | 1636806_at   |
| 1641623_at   | 1629241_at   | 1641359_at   | 1623166_at   | 1629406_at   | 1639019_s_at |
| 1639632_at   | 1625444_at   | 1636884_s_at | 1639075_a_at | 1630729_at   | 1636722_at   |

|              |              |              |              |              |              |
|--------------|--------------|--------------|--------------|--------------|--------------|
| 1622907_at   | 1631581_at   | 1629055_a_at | 1634437_at   | 1623838_s_at | 1630861_at   |
| 1639337_at   | 1636693_at   | 1624195_at   | 1638750_at   | 1626392_s_at | 1630550_a_at |
| 1631369_at   | 1634300_at   | 1634442_at   | 1633609_at   | 1625806_at   | 1628745_at   |
| 1632383_at   | 1631723_at   | 1626949_at   | 1636732_at   | 1640660_at   | 1638101_at   |
| 1638339_at   | 1636353_s_at | 1638453_at   | 1625934_at   | 1639367_a_at | 1639302_at   |
| 1624836_at   | 1630351_at   | 1630519_at   | 1627577_at   | 1626586_at   | 1624372_at   |
| 1637520_at   | 1629834_at   | 1630746_at   | 1640633_s_at | 1641157_at   | 1630881_at   |
| 1639313_at   | 1637015_s_at | 1624635_at   | 1627794_a_at | 1637125_at   | 1626918_at   |
| 1633215_at   | 1635031_s_at | 1626371_at   | 1640239_at   | 1627961_a_at | 1636291_at   |
| 1627982_at   | 1638496_at   | 1630781_at   | 1623824_at   | 1634324_at   | 1626222_at   |
| 1632517_at   | 1634427_at   | 1634217_s_at | 1632931_at   | 1638862_at   | 1636788_a_at |
| 1641193_s_at | 1637852_at   | 1634029_at   | 1636256_s_at | 1638343_at   | 1633646_at   |
| 1637993_at   | 1634177_a_at | 1633322_at   | 1635645_at   | 1634143_at   | 1625032_s_at |
| 1629109_at   | 1640191_a_at | 1626769_s_at | 1630565_at   | 1639818_s_at | 1637632_at   |
| 1640793_at   | 1638146_at   | 1640826_at   | 1630949_s_at | 1625129_at   | 1638354_at   |
| 1641541_a_at | 1634518_at   | 1639440_at   | 1624795_at   | 1636505_at   | 1633060_at   |
| 1635704_at   | 1629466_at   | 1637402_at   | 1634048_a_at | 1633349_at   | 1634240_at   |
| 1634541_a_at | 1627015_at   | 1629124_at   | 1623449_at   | 1633760_at   | 1623902_at   |
| 1629525_at   | 1626204_at   | 1631671_at   | 1631446_at   | 1625624_at   | 1636600_a_at |
| 1633584_at   | 1641372_at   | 1624510_at   | 1624357_at   | 1632392_s_at | 1625996_s_at |
| 1624782_a_at | 1624193_s_at | 1630527_at   | 1629655_at   | 1627676_at   | 1631948_s_at |

|              |              |              |              |              |              |
|--------------|--------------|--------------|--------------|--------------|--------------|
| 1627824_at   | 1640121_a_at | 1631194_at   | 1625212_at   | 1627073_a_at | 1630745_at   |
| 1624145_a_at | 1630917_at   | 1638562_a_at | 1641429_at   | 1625134_at   | 1624159_at   |
| 1636243_at   | 1637715_a_at | 1634957_at   | 1624485_at   | 1632545_s_at | 1630216_at   |
| 1634289_at   | 1630743_at   | 1628552_at   | 1623491_at   | 1637608_at   | 1630987_at   |
| 1636358_a_at | 1627403_s_at | 1632420_at   | 1635280_at   | 1625490_at   | 1637298_at   |
| 1641187_at   | 1625845_s_at | 1626435_at   | 1639544_at   | 1639646_at   | 1636777_at   |
| 1633716_at   | 1623456_at   | 1636175_a_at | 1636089_at   | 1627938_at   | 1638415_at   |
| 1636632_at   | 1639845_at   | 1635740_at   | 1637946_at   | 1641340_s_at | 1629960_s_at |
| 1641062_at   | 1636919_at   | 1637982_at   | 1633346_at   | 1639067_at   | 1624950_a_at |
| 1637309_a_at | 1633059_at   | 1623650_a_at | 1630309_s_at | 1632491_at   | 1623934_at   |
| 1627850_at   | 1627546_at   | 1640957_at   | 1636967_a_at | 1623306_at   | 1631370_at   |
| 1630661_at   | 1639398_at   | 1627662_at   | 1633980_at   | 1639972_at   | 1630568_at   |
| 1638078_at   | 1634012_at   | 1634164_at   | 1625571_at   | 1628637_at   | 1640178_at   |
| 1630844_at   | 1627116_at   | 1623809_s_at | 1641120_at   | 1632180_at   | 1632728_at   |
| 1635218_at   | 1623090_at   | 1636051_at   | 1630991_at   | 1639264_at   | 1627990_at   |
| 1630144_at   | 1636958_s_at | 1629367_at   | 1625773_at   | 1638844_s_at | 1631226_at   |
| 1624742_a_at | 1639430_at   | 1625531_at   | 1636249_at   | 1632810_at   | 1629762_at   |
| 1625688_at   | 1633700_at   | 1627505_at   | 1629930_s_at | 1633503_at   | 1628299_at   |
| 1624571_s_at | 1623673_at   | 1637716_a_at | 1627934_at   | 1631546_at   | 1632548_a_at |
| 1637997_at   | 1634750_at   | 1640351_s_at | 1624156_at   | 1624555_at   | 1623487_at   |
| 1633617_at   | 1630672_at   | 1623985_at   | 1635492_at   | 1636021_at   | 1628723_at   |



|              |              |              |              |              |              |
|--------------|--------------|--------------|--------------|--------------|--------------|
| 1626028_at   | 1630318_at   | 1625733_at   | 1638974_at   | 1639180_at   | 1622962_a_at |
| 1639966_a_at | 1625266_at   | 1627516_at   | 1630131_at   | 1634072_s_at | 1639272_at   |
| 1625295_at   | 1640691_at   | 1623609_at   | 1623553_a_at | 1628468_at   | 1641494_at   |
| 1634577_s_at | 1635394_at   | 1625000_a_at | 1628167_s_at | 1625700_a_at | 1625436_at   |
| 1633261_a_at | 1624550_at   | 1638147_at   | 1626382_s_at | 1635654_at   | 1636883_s_at |
| 1626300_at   | 1627827_a_at | 1638804_a_at | 1639553_at   | 1626055_at   | 1624788_at   |
| 1629541_at   | 1640298_at   | 1637825_at   | 1626117_at   | 1638677_at   | 1641336_at   |
| 1635389_s_at | 1627405_at   | 1625474_s_at | 1639324_at   | 1637422_at   | 1624008_at   |
| 1633380_at   | 1623641_at   | 1638385_at   | 1633830_at   | 1634848_at   | 1641105_at   |
| 1638216_at   | 1626309_at   | 1625345_at   | 1640202_at   | 1631045_a_at | 1634558_s_at |
| 1634429_at   | 1629716_a_at | 1638808_at   | 1636287_at   | 1634527_s_at | 1627959_a_at |
| 1623794_at   | 1627620_at   | 1637676_at   | 1625017_at   | 1634625_at   | 1633139_at   |
| 1627349_at   | 1626844_at   | 1638236_at   | 1629472_s_at | 1639354_at   | 1635135_at   |
| 1624028_at   | 1634311_at   | 1628632_at   | 1628389_at   | 1628798_at   | 1630438_at   |
| 1622930_a_at | 1640698_at   | 1632393_at   | 1634264_at   | 1638326_at   | 1626880_at   |
| 1635878_s_at | 1640683_at   | 1630997_at   | 1632254_a_at | 1638675_at   | 1636644_at   |
| 1631520_at   | 1632233_at   | 1624614_at   | 1638272_at   | 1626075_at   | 1637269_at   |
| 1629598_at   | 1637956_s_at | 1638869_at   | 1626579_at   | 1635581_at   | 1629610_at   |
| 1634383_a_at | 1626313_at   | 1636211_at   | 1636607_at   | 1633492_at   | 1638001_a_at |
| 1639867_at   | 1627562_at   | 1626846_s_at | 1628490_at   | 1641317_at   | 1640511_at   |
| 1636533_at   | 1624700_a_at | 1632410_at   | 1623404_at   | 1635670_at   | 1639087_at   |

|              |              |              |              |              |              |
|--------------|--------------|--------------|--------------|--------------|--------------|
| 1635636_at   | 1631873_at   | 1626718_at   | 1638104_a_at | 1640509_s_at | 1626738_at   |
| 1623875_at   | 1638857_at   | 1630080_at   | 1628494_a_at | 1626110_a_at | 1634696_at   |
| 1633536_at   | 1633210_at   | 1624798_s_at | 1633163_at   | 1639016_at   | 1639604_at   |
| 1625112_at   | 1623009_at   | 1623363_at   | 1630623_a_at | 1638208_at   | 1632642_a_at |
| 1632663_at   | 1641023_at   | 1634408_at   | 1628309_at   | 1624489_a_at | 1628418_at   |
| 1638849_a_at | 1627165_a_at | 1624080_s_at | 1631842_at   | 1626678_at   | 1623955_at   |
| 1627646_at   | 1632808_at   | 1626835_at   | 1639599_at   | 1623722_at   | 1635983_a_at |
| 1635468_a_at | 1628630_at   | 1628057_at   | 1638669_at   | 1631897_s_at | 1628539_at   |
| 1626823_a_at | 1635230_at   | 1640577_a_at | 1634253_at   | 1634809_s_at | 1627713_at   |
| 1633540_at   | 1640540_at   | 1634713_at   | 1641704_at   | 1629420_at   | 1624572_a_at |
| 1638735_at   | 1634966_a_at | 1628615_at   | 1638927_at   | 1633091_at   | 1634970_at   |
| 1629053_at   | 1631652_at   | 1625905_at   | 1628450_at   | 1627423_at   | 1626886_at   |
| 1625242_at   | 1634101_at   | 1623387_at   | 1629563_at   | 1625193_at   | 1635207_at   |
| 1630635_s_at | 1626373_at   | 1633260_at   | 1627623_s_at | 1638821_a_at | 1636541_at   |
| 1624670_at   | 1628828_s_at | 1632322_at   | 1641401_s_at | 1640566_at   | 1639230_at   |
| 1625393_s_at | 1638528_at   | 1633765_at   | 1641606_s_at | 1640744_a_at | 1638257_at   |
| 1624204_at   | 1628779_a_at | 1628424_at   | 1632472_s_at | 1636781_at   | 1627738_a_at |
| 1640974_a_at | 1635470_at   | 1635016_at   | 1632245_a_at | 1625646_at   | 1625217_at   |
| 1625185_at   | 1636354_at   | 1631637_a_at | 1641669_a_at | 1635831_at   | 1623847_at   |
| 1628187_s_at | 1625522_at   | 1626325_a_at | 1639424_at   | 1641244_at   | 1631192_at   |
| 1625006_at   | 1626606_at   | 1630325_at   | 1638464_a_at | 1638247_at   | 1623046_at   |

|              |              |              |              |              |              |
|--------------|--------------|--------------|--------------|--------------|--------------|
| 1623629_at   | 1623027_s_at | 1626360_at   | 1627674_at   | 1635527_at   | 1635198_at   |
| 1632471_at   | 1623318_s_at | 1634641_a_at | 1628869_s_at | 1629161_at   | 1637282_at   |
| 1629952_at   | 1635111_s_at | 1628648_at   | 1637085_at   | 1632487_at   | 1635301_at   |
| 1640657_at   | 1640738_a_at | 1624996_at   | 1636197_at   | 1632336_at   | 1629279_at   |
| 1639809_at   | 1639388_a_at | 1626524_at   | 1630011_at   | 1634320_at   | 1625027_a_at |
| 1624503_at   | 1631636_at   | 1631696_s_at | 1635683_at   | 1641000_a_at | 1626577_at   |
| 1623716_at   | 1626439_at   | 1628456_at   | 1631776_at   | 1624983_s_at | 1634604_at   |
| 1632654_at   | 1626981_s_at | 1632743_a_at | 1623331_at   | 1627343_a_at | 1630112_at   |
| 1636990_at   | 1633789_at   | 1627699_at   | 1639626_at   | 1632292_at   | 1633399_at   |
| 1637578_at   | 1625876_at   | 1627448_at   | 1626818_at   | 1633003_at   | 1624337_at   |
| 1636996_at   | 1639600_at   | 1633266_at   | 1625756_at   | 1639691_at   | 1628249_at   |
| 1635165_a_at | 1636980_s_at | 1623020_at   | 1630289_at   | 1632928_at   | 1638270_at   |
| 1639485_at   | 1623820_at   | 1629520_at   | 1628213_s_at | 1641659_s_at | 1627184_at   |
| 1632875_at   | 1627138_at   | 1631029_at   | 1629623_at   | 1640052_at   | 1639212_a_at |
| 1637742_at   | 1638819_at   | 1623108_at   | 1624222_s_at | 1624474_at   | 1625892_a_at |
| 1634943_at   | 1631627_at   | 1639853_at   | 1633338_at   | 1627958_at   | 1633448_at   |
| 1641664_at   | 1637429_at   | 1633664_at   | 1627655_at   | 1640489_at   | 1623635_at   |
| 1634299_at   | 1634176_a_at | 1635580_at   | 1637002_at   | 1631223_at   | 1640644_at   |
| 1632342_a_at | 1632400_at   | 1626649_s_at | 1624318_at   | 1632956_at   | 1627325_at   |
| 1628133_at   | 1636298_at   | 1628731_s_at | 1637403_at   | 1641232_s_at | 1634130_a_at |
| 1627415_at   | 1640768_at   | 1625744_at   | 1633364_at   | 1627171_at   | 1629088_at   |

|              |              |              |              |              |              |
|--------------|--------------|--------------|--------------|--------------|--------------|
| 1636206_at   | 1638919_at   | 1635250_at   | 1623797_at   | 1624386_at   | 1624198_at   |
| 1626049_at   | 1637325_at   | 1640418_at   | 1640549_at   | 1631116_at   | 1641419_at   |
| 1624037_s_at | 1637660_at   | 1626817_at   | 1638522_at   | 1631675_a_at | 1638822_at   |
| 1626788_a_at | 1640058_at   | 1636887_s_at | 1638030_at   | 1638126_at   | 1638321_s_at |
| 1630800_s_at | 1637423_at   | 1625549_at   | 1629180_at   | 1635668_at   | 1626507_at   |
| 1639520_at   | 1640943_at   | 1633284_at   | 1629008_at   | 1633791_at   | 1639761_s_at |
| 1625414_at   | 1641342_at   | 1637494_at   | 1635185_at   | 1640535_s_at | 1625375_at   |
| 1640005_at   | 1627627_at   | 1626209_a_at | 1636797_at   | 1628173_at   | 1627861_s_at |
| 1632024_at   | 1632161_at   | 1623508_at   | 1631278_a_at | 1632103_at   | 1631618_s_at |
| 1639286_s_at | 1632696_at   | 1640429_a_at | 1631266_a_at | 1629480_at   | 1626169_at   |
| 1635768_at   | 1638196_at   | 1624738_at   | 1635314_at   | 1638501_at   | 1631137_at   |
| 1635799_at   | 1627900_at   | 1636628_at   | 1639094_at   | 1632652_s_at | 1627007_at   |
| 1623688_at   | 1637576_s_at | 1630073_at   | 1639625_at   | 1629039_at   | 1634528_at   |
| 1625166_at   | 1627739_at   | 1628960_s_at | 1639389_at   | 1638509_at   | 1632586_at   |
| 1640669_at   | 1640487_at   | 1631158_at   | 1630405_at   | 1630514_at   | 1622924_at   |
| 1640695_at   | 1634000_a_at | 1623428_at   | 1629444_at   | 1628040_at   | 1626476_at   |
| 1626436_at   | 1638310_at   | 1623569_at   | 1636574_s_at | 1626514_at   | 1629941_a_at |
| 1626458_at   | 1627323_at   | 1639178_s_at | 1622944_at   | 1639256_at   | 1628351_at   |
| 1640452_at   | 1630900_at   | 1625464_at   | 1628279_s_at | 1635821_at   | 1626739_s_at |
| 1641424_at   | 1628486_a_at | 1626068_at   | 1635442_a_at | 1634953_at   | 1633565_at   |
| 1633826_at   | 1637497_at   | 1639060_at   | 1636623_at   | 1625344_at   | 1631973_at   |

|              |              |              |              |              |              |
|--------------|--------------|--------------|--------------|--------------|--------------|
| 1629821_at   | 1633308_at   | 1630916_at   | 1625891_at   | 1635751_at   | 1630115_at   |
| 1624801_at   | 1634553_at   | 1639895_at   | 1639025_at   | 1633047_at   | 1632846_at   |
| 1628882_at   | 1641146_at   | 1641488_at   | 1629896_at   | 1631224_at   | 1635978_at   |
| 1623724_at   | 1634002_at   | 1632078_at   | 1640781_a_at | 1625657_at   | 1637489_at   |
| 1624840_at   | 1637747_s_at | 1631561_s_at | 1624883_at   | 1623256_at   | 1638511_at   |
| 1641493_at   | 1635588_at   | 1640227_at   | 1629176_at   | 1624179_at   | 1628937_s_at |
| 1634481_at   | 1640251_s_at | 1636986_at   | 1639890_at   | 1625530_at   | 1636770_at   |
| 1629428_at   | 1633568_s_at | 1632533_at   | 1625458_a_at | 1629903_at   | 1638678_at   |
| 1634593_at   | 1636925_at   | 1625947_at   | 1628201_at   | 1624395_at   | 1630645_at   |
| 1630543_at   | 1629426_s_at | 1640421_at   | 1641212_a_at | 1627080_at   | 1630162_at   |
| 1641508_s_at | 1635723_s_at | 1633129_at   | 1638847_s_at | 1637260_at   | 1629778_s_at |
| 1631595_at   | 1627526_at   | 1634121_at   | 1633076_at   | 1624101_at   | 1635294_at   |
| 1639102_at   | 1638714_at   | 1631648_at   | 1624345_a_at | 1624888_at   | 1630792_at   |
| 1624285_at   | 1640504_at   | 1636738_at   | 1631362_at   | 1627742_at   | 1623111_at   |
| 1640898_at   | 1640243_at   | 1627155_s_at | 1629159_at   | 1640803_at   | 1633383_at   |
| 1629106_at   | 1630877_a_at | 1628972_at   | 1627183_at   | 1637027_s_at | 1624141_at   |
| 1633602_at   | 1640118_at   | 1630422_at   | 1635336_at   | 1636459_s_at | 1641285_at   |
| 1630778_at   | 1625026_at   | 1639328_at   | 1628976_at   | 1639480_at   | 1632703_at   |
| 1631822_at   | 1637205_at   | 1632731_at   | 1624297_at   | 1628345_at   | 1632341_at   |
| 1629967_s_at | 1622920_at   | 1628123_at   | 1625078_at   | 1634942_at   | 1636040_at   |
| 1630177_at   | 1640845_at   | 1641650_at   | 1629350_at   | 1637203_at   | 1634839_at   |

|              |              |              |              |              |              |
|--------------|--------------|--------------|--------------|--------------|--------------|
| 1641223_at   | 1636210_at   | 1626680_at   | 1635972_at   | 1624239_at   | 1640855_at   |
| 1623272_at   | 1633418_at   | 1636379_a_at | 1640846_at   | 1641017_at   | 1637319_at   |
| 1623605_a_at | 1632701_at   | 1632435_at   | 1640053_at   | 1631251_at   | 1625755_at   |
| 1638020_at   | 1641624_at   | 1629084_at   | 1633224_at   | 1641720_at   | 1624257_at   |
| 1635271_at   | 1635084_at   | 1634377_at   | 1630915_at   | 1641012_at   | 1629955_at   |
| 1627768_at   | 1632272_a_at | 1628834_a_at | 1626230_s_at | 1629295_at   | 1636767_at   |
| 1628292_s_at | 1641469_at   | 1624993_at   | 1624815_at   | 1636793_at   | 1623030_at   |
| 1624170_at   | 1634977_at   | 1627206_at   | 1640544_a_at | 1639908_a_at | 1634919_at   |
| 1633819_at   | 1634980_s_at | 1632184_at   | 1627759_at   | 1635761_at   | 1625974_at   |
| 1624515_at   | 1633050_at   | 1637316_at   | 1638645_at   | 1633749_at   | 1638367_at   |
| 1623956_at   | 1640244_at   | 1639694_s_at | 1624777_at   | 1639159_at   | 1625829_a_at |
| 1641318_at   | 1635076_at   | 1627249_a_at | 1637547_at   | 1631466_at   | 1628764_at   |
| 1632198_at   | 1629251_at   | 1628558_at   | 1626170_at   | 1627499_at   | 1626023_at   |
| 1630637_s_at | 1638853_at   | 1623271_a_at | 1635200_at   | 1630268_at   | 1624246_s_at |
| 1624514_at   | 1639374_s_at | 1637274_at   | 1631513_at   | 1639727_at   | 1633751_at   |
| 1623817_at   | 1623806_at   | 1622983_a_at | 1626942_at   | 1637928_at   | 1637032_at   |
| 1639265_at   | 1626022_at   | 1623281_s_at | 1623940_at   | 1625839_at   | 1623471_s_at |
| 1638292_at   | 1637501_a_at | 1638580_at   | 1628131_at   | 1622941_at   | 1632759_at   |
| 1635870_at   | 1624975_at   | 1638007_at   | 1637992_at   | 1624543_s_at | 1637475_at   |
| 1641381_s_at | 1626304_at   | 1641689_at   | 1634419_at   | 1630242_at   | 1630952_at   |
| 1627048_at   | 1630437_s_at | 1624496_at   | 1640997_at   | 1628290_s_at | 1623796_at   |

|              |              |              |              |              |              |
|--------------|--------------|--------------|--------------|--------------|--------------|
| 1630403_s_at | 1634464_at   | 1633926_at   | 1632207_a_at | 1634808_at   | 1637564_a_at |
| 1627401_at   | 1639663_at   | 1636002_at   | 1639579_s_at | 1637959_at   | 1634159_s_at |
| 1635687_at   | 1635548_s_at | 1628241_at   | 1632415_s_at | 1623015_at   | 1628634_at   |
| 1634194_at   | 1628521_at   | 1625783_at   | 1631512_at   | 1637275_a_at | 1640145_at   |
| 1636141_s_at | 1624406_at   | 1625948_at   | 1627642_at   | 1637240_a_at | 1623495_at   |
| 1629430_s_at | 1623645_a_at | 1639654_at   | 1636314_at   | 1639882_at   | 1641370_s_at |
| 1626039_at   | 1635040_a_at | 1632271_a_at | 1631214_at   | 1633053_at   | 1624010_a_at |
| 1628061_at   | 1638658_at   | 1623551_at   | 1639641_at   | 1634601_at   | 1640184_at   |
| 1631954_at   | 1634278_at   | 1629809_at   | 1624253_at   | 1625632_at   | 1626600_at   |
| 1626720_at   | 1632878_at   | 1635079_at   | 1633576_s_at | 1638392_at   | 1628792_at   |
| 1635939_a_at | 1632303_a_at | 1624894_s_at | 1623826_at   | 1636774_at   | 1629470_at   |
| 1635060_at   | 1625989_at   | 1624763_at   | 1632350_at   | 1640915_at   | 1632611_at   |
| 1631200_at   | 1624092_at   | 1637121_at   | 1626987_at   | 1636653_at   | 1629149_at   |
| 1630530_at   | 1630206_at   | 1639530_at   | 1633560_at   | 1641178_s_at | 1638319_at   |
| 1637559_at   | 1641626_at   | 1629449_at   | 1624736_a_at | 1627709_at   | 1630141_at   |
| 1627669_at   | 1639406_at   | 1623440_at   | 1635666_at   | 1625835_at   | 1637735_at   |
| 1627314_s_at | 1630882_s_at | 1625233_at   | 1633012_at   | 1631267_at   | 1636829_at   |
| 1631455_at   | 1640177_at   | 1625978_at   | 1632513_at   | 1635463_at   | 1631208_at   |
| 1623088_at   | 1638313_at   | 1639211_at   | 1637479_at   | 1623102_at   | 1634146_at   |
| 1640699_at   | 1632710_s_at | 1622998_a_at | 1632140_at   | 1631268_at   | 1626853_a_at |
| 1623247_at   | 1641655_at   | 1637926_s_at | 1627453_s_at | 1638173_s_at | 1628658_at   |

|              |              |              |              |              |              |
|--------------|--------------|--------------|--------------|--------------|--------------|
| 1638591_at   | 1626702_at   | 1636245_at   | 1641734_at   | 1634298_at   | 1626988_at   |
| 1638690_at   | 1634245_at   | 1630440_at   | 1639638_a_at | 1628547_at   | 1624518_at   |
| 1626217_at   | 1630492_at   | 1640335_at   | 1636336_at   | 1629939_a_at | 1641124_at   |
| 1627545_at   | 1629476_at   | 1638670_a_at | 1629474_at   | 1638153_at   | 1632364_at   |
| 1639442_a_at | 1635512_at   | 1622980_at   | 1636735_s_at | 1632026_at   | 1633810_at   |
| 1632374_at   | 1640848_at   | 1626580_at   | 1636036_at   | 1641252_at   | 1627831_at   |
| 1628930_at   | 1634258_at   | 1635989_at   | 1624697_at   | 1634700_at   | 1638317_at   |
| 1636858_at   | 1636708_at   | 1626011_at   | 1636190_at   | 1637466_at   | 1634124_at   |
| 1641605_at   | 1640446_s_at | 1631122_at   | 1630823_at   | 1640333_at   | 1630233_at   |
| 1641298_at   | 1633106_at   | 1640920_at   | 1622933_at   | 1626112_at   | 1640656_a_at |
| 1629285_at   | 1633592_a_at | 1640762_at   | 1628804_at   | 1626486_at   | 1623479_at   |
| 1629698_at   | 1637320_at   | 1629949_at   | 1637617_at   | 1636615_at   | 1639509_at   |
| 1623747_at   | 1625872_at   | 1623540_at   | 1641214_at   | 1637798_at   | 1637941_at   |
| 1627154_at   | 1641025_at   | 1631180_at   | 1629440_at   | 1633256_at   | 1630932_at   |
| 1628353_at   | 1640984_s_at | 1638485_s_at | 1629089_a_at | 1641671_at   | 1631640_a_at |
| 1637581_at   | 1632873_at   | 1625252_s_at | 1624596_at   | 1624693_at   | 1625836_at   |
| 1636005_at   | 1629607_at   | 1624194_a_at | 1631712_at   | 1635925_at   | 1632503_at   |
| 1630363_at   | 1641568_a_at | 1629954_at   | 1627581_at   | 1635517_at   | 1640411_at   |
| 1629918_at   | 1638469_s_at | 1640610_at   | 1634531_at   | 1634390_s_at | 1628826_at   |
| 1624699_s_at | 1631088_at   | 1626801_at   | 1629879_at   | 1629405_s_at | 1630981_at   |
| 1634158_at   | 1631139_a_at | 1624858_at   | 1637101_at   | 1624848_at   | 1638609_s_at |



|              |              |              |              |              |              |
|--------------|--------------|--------------|--------------|--------------|--------------|
| 1634798_at   | 1625995_a_at | 1627837_at   | 1629673_at   | 1630431_s_at | 1623861_at   |
| 1625044_at   | 1629602_at   | 1627977_at   | 1628887_a_at | 1631258_at   | 1633277_at   |
| 1631861_at   | 1633253_s_at | 1624887_at   | 1633649_s_at | 1638476_s_at | 1637682_at   |
| 1638614_at   | 1639769_at   | 1631739_at   | 1633209_s_at | 1633554_at   | 1636231_at   |
| 1640981_at   | 1635370_at   | 1630982_at   | 1633856_at   | 1636657_at   | 1633596_at   |
| 1637618_at   | 1627788_at   | 1636122_at   | 1623816_s_at | 1625860_s_at | 1624690_at   |
| 1635221_at   | 1626475_at   | 1636631_at   | 1639228_at   | 1623235_at   | 1634196_at   |
| 1637554_a_at | 1634117_at   | 1629853_at   | 1631196_at   | 1633019_a_at | 1636442_at   |
| 1640080_at   | 1640887_at   | 1631919_at   | 1623844_at   | 1637192_at   | 1640198_at   |
| 1635187_s_at | 1639071_a_at | 1636073_at   | 1638564_at   | 1627770_at   | 1624692_at   |
| 1640009_at   | 1630958_at   | 1626733_at   | 1639588_at   | 1638995_at   | 1634858_s_at |
| 1629391_at   | 1632318_at   | 1638997_at   | 1638841_at   | 1627527_s_at | 1627437_at   |
| 1627685_a_at | 1637313_at   | 1624603_at   | 1635278_at   | 1632894_at   | 1627996_a_at |
| 1639527_at   | 1627132_at   | 1625679_at   | 1636163_at   | 1632771_at   | 1627657_at   |
| 1630989_a_at | 1633008_at   | 1636809_at   | 1626164_at   | 1630732_at   | 1628922_s_at |
| 1638942_at   | 1635330_at   | 1634879_at   | 1628044_at   | 1626092_at   | 1640127_at   |
| 1640794_at   | 1625728_at   | 1636173_s_at | 1626787_s_at | 1631690_a_at | 1633761_at   |
| 1625748_s_at | 1624718_a_at | 1628593_at   | 1632197_at   | 1625572_s_at | 1624599_at   |
| 1633709_at   | 1628928_s_at | 1637056_s_at | 1630498_at   | 1628620_at   | 1623312_s_at |
| 1640339_at   | 1629208_at   | 1634740_at   | 1628874_at   | 1635621_at   | 1630547_at   |
| 1629787_at   | 1624050_at   | 1628963_at   | 1640824_at   | 1635524_at   | 1623329_at   |

|              |              |            |              |              |              |
|--------------|--------------|------------|--------------|--------------|--------------|
| 1636935_at   | 1623706_at   | 1627144_at | 1627307_at   | 1629144_at   | 1625177_at   |
| 1629552_at   | 1637923_at   | 1640961_at | 1625856_at   | 1630086_at   | 1639688_at   |
| 1639013_at   | 1624137_at   | 1641481_at | 1641549_at   | 1638431_at   | 1633911_a_at |
| 1634074_a_at | 1629906_s_at | 1629349_at | 1631392_at   | 1630051_at   | 1633439_at   |
| 1635987_at   | 1629811_at   | 1625817_at | 1638801_at   | 1636014_at   | 1633940_at   |
| 1625855_at   | 1629288_s_at | 1633134_at | 1634304_a_at | 1636587_at   | 1623759_at   |
| 1637829_at   | 1638600_at   | 1639665_at | 1632200_s_at | 1626563_at   | 1624669_at   |
| 1636583_at   | 1639901_a_at | 1628925_at | 1629195_at   | 1641294_a_at | 1636709_at   |
| 1628700_at   | 1623612_at   | 1624797_at | 1624684_at   | 1631030_at   | 1639198_at   |
| 1627868_at   | 1633117_at   | 1633755_at | 1632189_at   | 1634714_at   | 1635447_at   |
| 1630817_s_at | 1624613_at   | 1633731_at | 1633213_at   | 1634720_at   | 1623754_s_at |
| 1630912_at   | 1626412_at   | 1632519_at | 1634769_at   | 1628216_at   | 1626251_at   |
| 1631907_at   | 1629692_at   | 1629820_at | 1633964_at   | 1623128_at   | 1632138_at   |
| 1639539_at   | 1641721_a_at | 1636351_at | 1634262_s_at | 1638571_at   | 1637216_at   |
| 1630740_at   | 1633191_at   | 1630241_at | 1632847_at   | 1632816_at   | 1636498_at   |
| 1637648_at   | 1641648_at   | 1623109_at | 1628529_a_at | 1627661_at   | 1628148_at   |
| 1631751_at   | 1635487_at   | 1628559_at | 1628920_at   | 1626156_at   | 1631645_at   |
| 1628278_at   | 1637893_at   | 1633650_at | 1635513_at   | 1632510_at   | 1632182_at   |
| 1637775_at   | 1641629_at   | 1630940_at | 1633886_at   | 1639288_at   | 1637511_at   |
| 1634430_at   | 1631677_at   | 1634630_at | 1629705_at   | 1635428_at   | 1632955_at   |
| 1633000_a_at | 1635862_at   | 1629606_at | 1625725_at   | 1627640_at   | 1631058_s_at |

|              |              |              |              |              |              |
|--------------|--------------|--------------|--------------|--------------|--------------|
| 1635659_at   | 1624549_at   | 1632876_a_at | 1633274_at   | 1623974_at   | 1630202_a_at |
| 1627142_at   | 1629509_s_at | 1638697_at   | 1641519_at   | 1637689_at   | 1626478_at   |
| 1640150_s_at | 1629799_at   | 1625702_s_at | 1628603_at   | 1634949_at   | 1637960_at   |
| 1625109_at   | 1640357_at   | 1635502_at   | 1624978_at   | 1634094_a_at | 1627514_at   |
| 1626701_at   | 1630468_at   | 1631465_at   | 1640051_s_at | 1633020_at   | 1627308_s_at |
| 1626651_at   | 1633379_s_at | 1632269_at   | 1627293_at   | 1624714_at   | 1641263_at   |
| 1640638_at   | 1626213_a_at | 1637597_a_at | 1632384_at   | 1626696_at   | 1636861_at   |
| 1629928_a_at | 1627123_at   | 1638171_s_at | 1641601_at   | 1638088_at   | 1632114_at   |
| 1633254_at   | 1628561_at   | 1630600_at   | 1624592_at   | 1638988_at   | 1632600_at   |
| 1636198_at   | 1623147_at   | 1628485_at   | 1632430_at   | 1636258_at   | 1626993_at   |
| 1631829_at   | 1623839_at   | 1640010_at   | 1638544_at   | 1635213_at   | 1625651_at   |
| 1638403_at   | 1635907_at   | 1631464_at   | 1633691_at   | 1624694_at   | 1636271_a_at |
| 1641335_at   | 1624153_at   | 1630167_at   | 1624226_at   | 1627216_s_at | 1639931_at   |
| 1628578_at   | 1637807_at   | 1626808_s_at | 1626224_s_at | 1631819_s_at | 1622952_at   |
| 1636470_at   | 1633634_at   | 1637209_at   | 1634579_at   | 1632762_s_at | 1623291_at   |
| 1630992_at   | 1638192_a_at | 1634874_at   | 1630132_at   | 1630355_a_at | 1639240_a_at |
| 1633908_at   | 1632962_at   | 1625583_at   | 1627013_at   | 1633782_at   | 1623085_at   |
| 1629369_at   | 1641203_at   | 1639653_at   | 1629530_at   | 1633454_s_at | 1625062_a_at |
| 1631105_at   | 1623202_at   | 1639107_at   | 1638796_at   | 1640031_at   | 1631335_a_at |
| 1640862_a_at | 1627246_at   | 1634883_at   | 1636645_at   | 1628866_at   | 1628683_at   |
| 1625814_at   | 1630118_s_at | 1625853_at   | 1624201_at   | 1628179_at   | 1639421_at   |

|              |              |              |              |              |              |
|--------------|--------------|--------------|--------------|--------------|--------------|
| 1626469_at   | 1634045_at   | 1637628_at   | 1627725_at   | 1634862_at   | 1639640_at   |
| 1636501_at   | 1636596_at   | 1633736_at   | 1631198_at   | 1625334_at   | 1623737_a_at |
| 1629507_a_at | 1634982_at   | 1636564_at   | 1626698_at   | 1633517_at   | 1627613_at   |
| 1635279_at   | 1636910_at   | 1636949_s_at | 1632623_at   | 1639444_a_at | 1641681_s_at |
| 1635125_a_at | 1624570_a_at | 1637469_at   | 1635247_at   | 1624070_at   | 1633055_at   |
| 1622903_s_at | 1634868_at   | 1640174_at   | 1639307_at   | 1630803_at   | 1633606_s_at |
| 1638410_at   | 1623040_at   | 1630016_at   | 1633259_a_at | 1637962_at   | 1625377_at   |
| 1623998_at   | 1627331_at   | 1629302_at   | 1635564_at   | 1631182_at   | 1623606_at   |
| 1629355_at   | 1626667_at   | 1630813_at   | 1629363_at   | 1641306_at   | 1624807_at   |
| 1630246_at   | 1629489_at   | 1635439_at   | 1632665_a_at | 1624913_s_at | 1640323_at   |
| 1639392_at   | 1625280_at   | 1628382_at   | 1638797_a_at | 1634795_a_at | 1630332_at   |
| 1634296_s_at | 1638793_at   | 1631130_at   | 1629644_s_at | 1641327_at   | 1639478_at   |
| 1641597_a_at | 1641520_at   | 1634382_at   | 1632277_a_at | 1623745_at   | 1635121_a_at |
| 1640316_at   | 1637346_at   | 1637919_at   | 1632251_s_at | 1632250_at   | 1636327_at   |
| 1638087_at   | 1638499_s_at | 1641326_at   | 1627985_a_at | 1626572_at   | 1625172_s_at |
| 1634407_at   | 1630419_a_at | 1627511_at   | 1629374_at   | 1639768_at   | 1635887_at   |
| 1624945_a_at | 1626155_at   | 1624404_a_at | 1640619_at   | 1639112_s_at | 1635379_at   |
| 1640601_at   | 1623475_s_at | 1638661_at   | 1632098_at   | 1636320_at   | 1639312_at   |
| 1626957_at   | 1629625_at   | 1640905_at   | 1638651_a_at | 1633642_at   | 1641350_at   |
| 1633078_at   | 1640642_at   | 1640343_at   | 1640425_at   | 1636630_s_at | 1633703_s_at |
| 1624860_at   | 1638811_at   | 1637369_at   | 1632593_at   | 1634212_at   | 1625120_at   |

|              |              |              |              |              |              |
|--------------|--------------|--------------|--------------|--------------|--------------|
| 1627993_at   | 1625746_at   | 1624509_at   | 1627774_a_at | 1639891_at   | 1633394_a_at |
| 1625665_at   | 1624854_s_at | 1624214_at   | 1633001_at   | 1639648_at   | 1641687_at   |
| 1635067_at   | 1640821_at   | 1634504_a_at | 1633100_a_at | 1640134_a_at | 1635410_at   |
| 1636268_at   | 1625945_a_at | 1628342_s_at | 1637329_a_at | 1632577_a_at | 1626007_at   |
| 1624099_at   | 1640477_at   | 1630815_at   | 1633949_at   | 1639483_s_at | 1625844_s_at |
| 1633294_at   | 1639413_at   | 1624173_at   | 1624064_at   | 1634600_at   | 1638634_at   |
| 1630187_a_at | 1641126_at   | 1626201_at   | 1631048_at   | 1626719_a_at | 1629619_at   |
| 1625639_at   | 1636020_s_at | 1634209_at   | 1636323_at   | 1627100_s_at | 1638158_at   |
| 1637881_at   | 1626432_at   | 1636154_at   | 1640064_at   | 1632262_at   | 1638224_at   |
| 1640088_at   | 1638074_at   | 1632567_at   | 1626369_at   | 1627538_at   | 1637144_a_at |
| 1631853_at   | 1627842_at   | 1638834_a_at | 1626236_at   | 1635774_at   | 1635813_at   |
| 1639715_at   | 1625658_at   | 1633804_at   | 1630008_at   | 1635801_at   | 1623646_at   |
| 1631862_at   | 1636923_a_at | 1625481_a_at | 1631619_a_at | 1638958_at   | 1623258_at   |
| 1627141_at   | 1634116_at   | 1628101_s_at | 1634767_at   | 1625055_at   | 1637264_at   |
| 1639503_at   | 1629155_at   | 1625096_at   | 1641347_s_at | 1624014_at   | 1640034_at   |
| 1627153_at   | 1634446_at   | 1631984_at   | 1626289_at   | 1633957_s_at | 1631296_at   |
| 1623426_at   | 1635115_at   | 1629780_at   | 1631800_at   | 1634241_at   | 1637845_at   |
| 1631588_at   | 1634238_a_at | 1624841_s_at | 1627459_at   | 1639499_at   | 1637317_at   |
| 1638870_at   | 1624725_at   | 1626658_at   | 1628677_at   | 1624973_at   | 1632777_at   |
| 1626850_s_at | 1631849_at   | 1628297_a_at | 1632266_at   | 1633797_at   | 1638671_at   |
| 1628917_at   | 1625085_at   | 1637098_at   | 1632368_at   | 1623502_at   | 1623342_at   |

|              |              |              |              |              |              |
|--------------|--------------|--------------|--------------|--------------|--------------|
| 1635035_at   | 1637972_at   | 1626734_at   | 1626508_at   | 1641309_s_at | 1640927_at   |
| 1631998_at   | 1624414_at   | 1632557_s_at | 1627469_at   | 1640068_at   | 1624343_at   |
| 1624019_s_at | 1641451_at   | 1627888_at   | 1634655_at   | 1630542_at   | 1630841_at   |
| 1633034_s_at | 1626931_a_at | 1634172_at   | 1630934_at   | 1623376_s_at | 1636847_s_at |
| 1626620_at   | 1627460_at   | 1633442_at   | 1633661_at   | 1634076_at   | 1631777_a_at |
| 1641069_at   | 1637665_at   | 1623297_at   | 1623375_at   | 1625528_at   | 1636140_at   |
| 1637827_at   | 1629046_a_at | 1641478_s_at | 1623663_a_at | 1635650_at   | 1627023_at   |
| 1628809_at   | 1638349_s_at | 1635792_a_at | 1641038_at   | 1623936_at   | 1625343_at   |
| 1637100_at   | 1631527_at   | 1637142_at   | 1635811_at   | 1640995_at   | 1638277_at   |
| 1636293_at   | 1638923_at   | 1638218_at   | 1630213_at   | 1630276_at   | 1640173_at   |
| 1629194_s_at | 1635186_at   | 1639807_s_at | 1637023_at   | 1623086_at   | 1634261_at   |
| 1628503_at   | 1636382_at   | 1635917_at   | 1629041_at   | 1624984_at   | 1627081_at   |
| 1637626_at   | 1636571_at   | 1626984_at   | 1636652_a_at | 1628947_s_at | 1637871_at   |
| 1629246_at   | 1633615_at   | 1628393_at   | 1637314_at   | 1634811_at   | 1624405_a_at |
| 1628617_at   | 1624450_at   | 1638712_at   | 1635355_a_at | 1640980_at   | 1639111_at   |
| 1623203_at   | 1635911_s_at | 1628028_s_at | 1639276_at   | 1628605_at   | 1625048_at   |
| 1639645_at   | 1628767_s_at | 1640870_s_at | 1640084_a_at | 1641614_at   | 1639346_at   |
| 1634334_at   | 1633835_s_at | 1626272_s_at | 1632256_at   | 1632394_s_at | 1627898_at   |
| 1624168_at   | 1641096_s_at | 1636270_at   | 1627665_at   | 1629920_at   | 1623482_at   |
| 1640799_at   | 1634616_at   | 1623879_at   | 1626125_at   | 1624779_at   | 1631293_at   |
| 1635073_at   | 1626108_at   | 1636971_at   | 1634856_at   | 1639495_at   | 1635897_at   |

|              |              |              |              |              |              |
|--------------|--------------|--------------|--------------|--------------|--------------|
| 1634922_s_at | 1633593_s_at | 1632606_a_at | 1631633_a_at | 1639678_at   | 1627778_a_at |
| 1629746_at   | 1634757_a_at | 1636544_at   | 1631525_at   | 1633778_at   | 1625422_at   |
| 1632594_at   | 1630756_at   | 1629001_at   | 1623901_s_at | 1635063_at   | 1633491_s_at |
| 1641522_at   | 1631006_a_at | 1639954_at   | 1628240_at   | 1626947_s_at | 1640211_at   |
| 1635854_s_at | 1634764_at   | 1625031_at   | 1628565_at   | 1626003_s_at | 1634301_at   |
| 1630679_at   | 1623904_a_at | 1633011_at   | 1640185_at   | 1633545_at   | 1627844_at   |
| 1623789_at   | 1632575_at   | 1634095_at   | 1641148_a_at | 1639197_at   | 1627235_at   |
| 1625041_at   | 1632483_at   | 1641068_a_at | 1640584_at   | 1640852_at   | 1631745_at   |
| 1638374_at   | 1634168_s_at | 1627743_at   | 1641449_at   | 1630529_at   | 1640719_at   |
| 1628448_at   | 1624475_at   | 1627245_s_at | 1635616_a_at | 1635881_at   | 1624280_at   |
| 1638548_at   | 1632580_at   | 1639251_at   | 1623448_at   | 1638840_at   | 1638526_a_at |
| 1631621_s_at | 1640073_at   | 1625918_a_at | 1632897_at   | 1631688_at   | 1639115_s_at |
| 1631383_at   | 1634859_at   | 1637399_at   | 1640240_s_at | 1640309_s_at | 1636003_at   |
| 1626786_at   | 1633558_s_at | 1631264_at   | 1627218_a_at | 1633652_at   | 1624529_at   |
| 1632135_a_at | 1636932_at   | 1627589_s_at | 1638325_at   | 1639070_a_at | 1638178_at   |
| 1635830_at   | 1631098_at   | 1632188_at   | 1632590_at   | 1627337_at   | 1639195_a_at |
| 1628186_at   | 1639951_at   | 1634463_at   | 1628959_at   | 1629726_at   | 1639993_at   |
| 1631263_at   | 1624213_at   | 1639744_at   | 1628399_s_at | 1622949_at   | 1626854_at   |
| 1636192_at   | 1624939_at   | 1636988_at   | 1636147_at   | 1629316_at   | 1638387_at   |
| 1623972_a_at | 1640992_at   | 1629795_at   | 1624750_at   | 1627812_s_at | 1632640_at   |
| 1635627_at   | 1628387_s_at | 1625878_at   | 1625633_a_at | 1631935_at   | 1628277_at   |

|              |              |              |              |              |              |
|--------------|--------------|--------------|--------------|--------------|--------------|
| 1638973_s_at | 1632583_at   | 1631015_s_at | 1634265_at   | 1634881_at   | 1629303_at   |
| 1624905_at   | 1628340_s_at | 1637322_at   | 1633625_s_at | 1639243_at   | 1629018_a_at |
| 1623339_at   | 1626693_at   | 1639193_a_at | 1630735_at   | 1631347_at   | 1634197_at   |
| 1623584_at   | 1632803_at   | 1630067_a_at | 1628670_at   | 1633498_at   | 1636019_at   |
| 1641117_a_at | 1625893_a_at | 1625051_at   | 1628681_at   | 1632106_at   | 1624587_at   |
| 1633559_at   | 1627239_s_at | 1623485_at   | 1633389_at   | 1636795_at   | 1639202_a_at |
| 1630199_at   | 1632282_s_at | 1636942_at   | 1626898_at   | 1635361_at   | 1634057_at   |
| 1637866_at   | 1622895_at   | 1641645_at   | 1631218_at   | 1641399_at   | 1625339_at   |
| 1639500_at   | 1631591_at   | 1635027_at   | 1635953_at   | 1635934_at   | 1632335_at   |
| 1623193_at   | 1633858_at   | 1627472_at   | 1628117_at   | 1623744_at   | 1625144_at   |
| 1634722_s_at | 1631313_at   | 1625354_at   | 1638350_at   | 1629395_at   | 1630636_s_at |
| 1623698_s_at | 1629433_at   | 1640552_at   | 1623591_a_at | 1624765_at   | 1639680_at   |
| 1641362_at   | 1641143_s_at | 1637990_s_at | 1636599_at   | 1629867_a_at | 1635857_at   |
| 1631603_at   | 1635794_a_at | 1623231_at   | 1638259_s_at | 1634224_at   | 1623117_at   |
| 1624409_a_at | 1637521_at   | 1638615_s_at | 1622975_at   | 1622971_at   | 1629838_at   |
| 1623408_s_at | 1625863_at   | 1623766_at   | 1628612_at   | 1636341_at   | 1632226_at   |
| 1624663_a_at | 1631994_a_at | 1625337_s_at | 1638782_at   | 1637220_s_at | 1623044_at   |
| 1626506_at   | 1630669_at   | 1631515_at   | 1632427_at   | 1626924_a_at | 1634651_at   |
| 1641579_at   | 1625081_at   | 1638795_at   | 1631304_a_at | 1640460_at   | 1638739_at   |
| 1637549_at   | 1625722_at   | 1640190_at   | 1636812_at   | 1624229_at   | 1635448_at   |
| 1626911_at   | 1626888_at   | 1637951_at   | 1634126_at   | 1624499_s_at | 1629358_s_at |



|              |              |              |              |              |              |
|--------------|--------------|--------------|--------------|--------------|--------------|
| 1634644_at   | 1632581_at   | 1624458_at   | 1624456_at   | 1634178_at   | 1636357_at   |
| 1631106_s_at | 1629685_at   | 1624808_at   | 1628839_at   | 1640317_at   | 1624775_at   |
| 1623241_s_at | 1626710_at   | 1633168_at   | 1624639_at   | 1634239_at   | 1626873_a_at |
| 1624419_a_at | 1638448_at   | 1623992_at   | 1634167_a_at | 1625898_s_at | 1631610_at   |
| 1631820_at   | 1626326_at   | 1637623_at   | 1630050_at   | 1631469_at   | 1625136_s_at |
| 1623862_at   | 1638110_at   | 1641489_at   | 1623595_at   | 1634019_at   | 1637277_at   |
| 1635826_s_at | 1631034_at   | 1630278_s_at | 1623190_at   | 1631047_at   | 1629984_s_at |
| 1624617_at   | 1627056_a_at | 1635547_a_at | 1625486_a_at | 1625521_at   | 1641426_at   |
| 1640618_at   | 1639322_at   | 1636484_at   | 1638527_a_at | 1628114_s_at | 1626864_at   |
| 1627473_at   | 1641003_at   | 1625190_at   | 1628248_at   | 1635128_a_at | 1634271_at   |
| 1633767_at   | 1637368_at   | 1623943_at   | 1639629_at   | 1628829_at   | 1627111_at   |
| 1631308_at   | 1626531_at   | 1640151_at   | 1639295_at   | 1624427_at   | 1631572_at   |
| 1628000_s_at | 1636170_at   | 1637740_at   | 1635521_at   | 1625450_at   | 1637738_at   |
| 1639101_at   | 1630130_at   | 1627605_at   | 1628479_at   | 1631828_s_at | 1640825_a_at |
| 1634281_at   | 1635469_at   | 1633237_at   | 1641313_at   | 1635996_at   | 1634015_s_at |
| 1630396_at   | 1629862_at   | 1637193_at   | 1632636_at   | 1631204_at   | 1624415_s_at |
| 1640565_at   | 1639064_s_at | 1636476_a_at | 1625859_at   | 1627746_at   | 1636237_s_at |
| 1623214_at   | 1631114_a_at | 1639848_at   | 1636227_at   | 1629614_at   | 1637191_at   |
| 1640755_at   | 1640368_at   | 1637060_a_at | 1625141_at   | 1636094_at   | 1631486_at   |
| 1640529_at   | 1627673_at   | 1639955_at   | 1628995_at   | 1637394_s_at | 1623887_at   |
| 1641459_at   | 1630340_at   | 1623819_at   | 1629252_at   | 1640122_at   | 1638438_a_at |

|              |              |              |              |              |              |
|--------------|--------------|--------------|--------------|--------------|--------------|
| 1639976_at   | 1640599_at   | 1627180_at   | 1628427_a_at | 1639034_at   | 1634636_at   |
| 1635160_at   | 1640560_at   | 1637068_at   | 1635607_at   | 1635454_a_at | 1635714_s_at |
| 1633883_at   | 1641444_a_at | 1625566_a_at | 1623377_at   | 1626766_s_at | 1634331_at   |
| 1639737_at   | 1624678_at   | 1636512_s_at | 1626717_at   | 1630366_at   | 1635446_at   |
| 1635421_at   | 1640170_at   | 1639968_at   | 1637809_at   | 1623463_at   | 1630395_at   |
| 1627659_at   | 1629027_at   | 1624380_at   | 1631672_at   | 1636894_s_at | 1638183_at   |
| 1625966_at   | 1640233_at   | 1629021_at   | 1639698_at   | 1636193_at   | 1634784_at   |
| 1635824_at   | 1625772_at   | 1638637_at   | 1641476_a_at | 1636837_at   | 1623353_at   |
| 1629792_at   | 1628667_at   | 1640818_at   | 1641031_s_at | 1623770_at   | 1640109_at   |
| 1626933_s_at | 1626768_at   | 1626133_s_at | 1640782_at   | 1630388_at   | 1623138_at   |
| 1636614_a_at | 1633361_at   | 1632176_at   | 1630753_at   | 1629943_at   | 1630723_a_at |
| 1623903_at   | 1628759_a_at | 1640187_a_at | 1631148_at   | 1634988_a_at | 1622928_at   |
| 1638130_at   | 1627638_s_at | 1639662_at   | 1632971_at   | 1639898_at   | 1630851_s_at |
| 1639391_at   | 1639633_at   | 1640999_at   | 1629409_s_at | 1639642_a_at | 1626964_at   |
| 1635951_at   | 1624118_at   | 1629603_at   | 1631330_at   | 1625714_a_at | 1632139_at   |
| 1634003_at   | 1631168_at   | 1636602_at   | 1628649_at   | 1633080_at   | 1627781_at   |
| 1629558_at   | 1630264_at   | 1634898_a_at | 1635051_a_at | 1625608_at   | 1627894_s_at |
| 1627682_at   | 1641101_at   | 1641534_at   | 1628312_at   | 1629327_at   | 1625879_at   |
| 1626231_at   | 1641532_at   | 1625631_at   | 1623439_at   | 1624483_at   | 1629462_at   |
| 1631915_at   | 1633490_at   | 1627832_at   | 1625824_at   | 1635629_at   | 1631848_at   |
| 1624792_at   | 1627680_at   | 1627910_s_at | 1627099_at   | 1627055_at   | 1639403_s_at |

|              |              |              |              |              |              |
|--------------|--------------|--------------|--------------|--------------|--------------|
| 1625590_a_at | 1631009_at   | 1631602_at   | 1625016_at   | 1623746_a_at | 1632688_s_at |
| 1623587_at   | 1622921_at   | 1636743_s_at | 1636009_at   | 1631740_at   | 1627271_at   |
| 1627078_at   | 1635725_a_at | 1640774_a_at | 1631767_at   | 1634492_s_at | 1641366_at   |
| 1627643_at   | 1638229_at   | 1639950_at   | 1627873_at   | 1631931_s_at | 1632247_at   |
| 1636242_at   | 1633754_at   | 1627364_s_at | 1626332_s_at | 1638748_at   | 1640765_at   |
| 1624073_at   | 1636098_at   | 1634230_s_at | 1639519_at   | 1624581_at   | 1633335_at   |
| 1623539_at   | 1629473_at   | 1641737_a_at | 1627865_a_at | 1639152_at   | 1634979_at   |
| 1627967_a_at | 1628663_s_at | 1638217_at   | 1622940_at   | 1628601_at   | 1623699_a_at |
| 1635552_s_at | 1627729_s_at | 1627660_a_at | 1636717_at   | 1624919_at   | 1639598_at   |
| 1624877_at   | 1624435_at   | 1640454_at   | 1631368_s_at | 1625674_at   | 1636412_at   |
| 1631288_at   | 1629401_s_at | 1635550_at   | 1633998_s_at | 1637383_at   | 1623134_at   |
| 1636852_at   | 1634174_at   | 1629921_a_at | 1633912_at   | 1624192_at   | 1628011_a_at |
| 1626810_at   | 1641685_at   | 1629629_at   | 1638162_s_at | 1630630_at   | 1627733_at   |
| 1623926_at   | 1630003_at   | 1632179_at   | 1625540_at   | 1624628_at   | 1639712_at   |
| 1636816_s_at | 1640655_s_at | 1634619_at   | 1626781_at   | 1628673_at   | 1637963_at   |
| 1637601_at   | 1634615_at   | 1632422_s_at | 1631077_at   | 1640336_at   | 1623094_at   |
| 1627492_at   | 1640215_at   | 1638427_at   | 1633074_a_at | 1638693_s_at | 1640954_at   |
| 1627433_at   | 1639057_at   | 1628204_at   | 1628459_at   | 1640548_at   | 1632171_a_at |
| 1637050_at   | 1625340_at   | 1639957_s_at | 1640126_at   | 1623206_a_at | 1635903_at   |
| 1627829_at   | 1630798_at   | 1639567_at   | 1633967_at   | 1632855_at   | 1629189_at   |
| 1634204_at   | 1633923_at   | 1640998_at   | 1636262_at   | 1640492_at   | 1629468_at   |

|              |              |              |              |              |              |
|--------------|--------------|--------------|--------------|--------------|--------------|
| 1635528_s_at | 1628981_at   | 1628997_at   | 1640269_at   | 1624332_s_at | 1625137_at   |
| 1634081_at   | 1632465_s_at | 1632800_at   | 1627916_s_at | 1628968_at   | 1631179_s_at |
| 1628035_at   | 1623573_s_at | 1636589_s_at | 1640867_s_at | 1629151_at   | 1631653_at   |
| 1641610_at   | 1624906_at   | 1628364_at   | 1628901_at   | 1637546_at   | 1636356_at   |
| 1629784_a_at | 1640382_at   | 1636851_at   | 1634100_at   | 1638618_a_at | 1625923_s_at |
| 1636525_at   | 1640881_at   | 1627447_at   | 1633004_at   | 1635281_at   | 1636087_at   |
| 1633079_at   | 1638839_at   | 1624027_at   | 1630673_at   | 1636896_a_at | 1639903_at   |
| 1632702_at   | 1628352_a_at | 1632194_at   | 1632381_at   | 1627945_at   | 1640602_s_at |
| 1630001_at   | 1627779_at   | 1640020_at   | 1627983_at   | 1633771_s_at | 1636109_at   |
| 1634068_at   | 1627009_at   | 1640574_at   | 1633113_at   | 1630024_at   | 1632882_at   |
| 1623320_at   | 1625585_at   | 1641462_at   | 1627925_at   | 1625960_at   | 1627863_at   |
| 1634692_at   | 1629956_at   | 1634128_at   | 1628627_at   | 1631447_at   | 1628295_at   |
| 1625317_at   | 1628574_at   | 1624991_at   | 1641142_at   | 1632714_at   | 1624060_at   |
| 1633784_at   | 1637589_at   | 1624208_s_at | 1629663_at   | 1631244_a_at | 1628557_at   |
| 1626123_at   | 1631815_at   | 1634801_at   | 1639817_at   | 1624938_at   | 1631282_at   |
| 1640349_at   | 1627575_at   | 1631877_a_at | 1636130_at   | 1638882_at   | 1627431_at   |
| 1630988_at   | 1628788_a_at | 1629096_at   | 1641530_s_at | 1623115_at   | 1628832_s_at |
| 1635239_at   | 1628608_at   | 1630539_at   | 1629870_at   | 1639554_at   | 1623644_s_at |
| 1639309_at   | 1637621_at   | 1630794_at   | 1625095_at   | 1627458_at   | 1623286_at   |
| 1632521_at   | 1637954_at   | 1628775_s_at | 1627813_at   | 1636807_at   | 1633212_s_at |
| 1626215_at   | 1639168_at   | 1634992_s_at | 1628260_at   | 1637620_s_at | 1641553_at   |

|              |              |              |              |              |              |
|--------------|--------------|--------------|--------------|--------------|--------------|
| 1622939_at   | 1631363_at   | 1640278_at   | 1640967_at   | 1624831_at   | 1629239_s_at |
| 1628243_at   | 1635201_at   | 1630737_at   | 1631270_at   | 1630699_at   | 1624719_at   |
| 1637526_s_at | 1623686_at   | 1627240_at   | 1634316_at   | 1636119_at   | 1630258_at   |
| 1624595_a_at | 1626073_a_at | 1628507_at   | 1640076_at   | 1638603_at   | 1632589_at   |
| 1626798_a_at | 1628686_a_at | 1627796_s_at | 1629365_at   | 1631578_s_at | 1635157_at   |
| 1637138_at   | 1636269_at   | 1636446_at   | 1625439_at   | 1625533_at   | 1635435_at   |
| 1632850_at   | 1636900_at   | 1639375_a_at | 1634738_s_at | 1626175_at   | 1635874_at   |
| 1632261_at   | 1641600_at   | 1630093_at   | 1631757_at   | 1627677_s_at | 1628422_s_at |
| 1629751_at   | 1633061_at   | 1640108_at   | 1623590_s_at | 1638456_at   | 1634359_a_at |
| 1634983_s_at | 1636322_at   | 1637980_at   | 1633906_at   | 1624583_at   | 1628428_at   |
| 1629319_at   | 1639189_at   | 1639622_at   | 1631174_at   | 1624504_s_at | 1639607_at   |
| 1625683_at   | 1628111_at   | 1633194_at   | 1635118_at   | 1626148_at   | 1623346_at   |
| 1632338_a_at | 1638204_s_at | 1623888_at   | 1641386_at   | 1639762_at   | 1638334_at   |
| 1636160_at   | 1640716_at   | 1640485_at   | 1640801_at   | 1640086_at   | 1636711_at   |
| 1638980_at   | 1628729_at   | 1624653_at   | 1626010_at   | 1639779_at   | 1636330_at   |
| 1625220_at   | 1632999_at   | 1626344_at   | 1627340_at   | 1638397_at   | 1637007_s_at |
| 1626425_at   | 1636426_at   | 1623873_at   | 1641702_at   | 1632662_at   | 1639015_s_at |
| 1627292_at   | 1632019_s_at | 1628092_at   | 1633362_at   | 1628180_at   | 1640455_a_at |
| 1636286_at   | 1637625_s_at | 1630950_at   | 1626689_at   | 1623792_a_at | 1637795_at   |
| 1631062_at   | 1640532_at   | 1638351_s_at | 1625047_at   | 1638659_at   | 1623248_s_at |
| 1625502_at   | 1633704_at   | 1623465_at   | 1630149_at   | 1638582_at   | 1637267_at   |

|              |              |              |              |              |              |
|--------------|--------------|--------------|--------------|--------------|--------------|
| 1633776_s_at | 1636080_a_at | 1635969_at   | 1632761_at   | 1627254_at   | 1629479_a_at |
| 1632730_at   | 1625626_at   | 1629431_at   | 1638640_at   | 1635155_a_at | 1636401_a_at |
| 1623997_s_at | 1641745_a_at | 1637284_at   | 1631326_at   | 1639471_s_at | 1623856_at   |
| 1629884_at   | 1636468_a_at | 1630999_at   | 1623118_s_at | 1635303_at   | 1627716_at   |
| 1626747_at   | 1637124_at   | 1627539_at   | 1640679_at   | 1633287_at   | 1635482_at   |
| 1623993_at   | 1627003_at   | 1634629_at   | 1628987_at   | 1625990_at   | 1631756_at   |
| 1639037_at   | 1630675_at   | 1632462_at   | 1638053_at   | 1628706_at   | 1625595_a_at |
| 1630172_at   | 1635927_at   | 1632621_at   | 1627597_at   | 1637662_at   | 1636016_at   |
| 1628016_s_at | 1629148_a_at | 1635631_a_at | 1627168_at   | 1635382_at   | 1631631_at   |
| 1626503_at   | 1626468_a_at | 1634969_at   | 1626257_at   | 1623670_at   | 1630227_a_at |
| 1636515_at   | 1631869_at   | 1641485_at   | 1637453_at   | 1640123_at   | 1630555_at   |
| 1631763_at   | 1635773_at   | 1625469_at   | 1625004_at   | 1625425_a_at | 1634302_s_at |
| 1634402_at   | 1624744_a_at | 1633680_at   | 1630312_s_at | 1626307_at   | 1633651_at   |
| 1624338_at   | 1635944_a_at | 1630263_at   | 1625145_a_at | 1635671_at   | 1623554_at   |
| 1638699_at   | 1626438_at   | 1625567_a_at | 1626561_at   | 1624363_at   | 1628017_a_at |
| 1625822_at   | 1640401_at   | 1639191_at   | 1627890_at   | 1631172_at   | 1625022_a_at |
| 1629923_at   | 1634127_a_at | 1629888_at   | 1639344_at   | 1624902_at   | 1638282_at   |
| 1627973_s_at | 1639952_at   | 1635549_at   | 1634845_at   | 1624296_at   | 1628435_at   |
| 1640525_a_at | 1628275_at   | 1630768_s_at | 1627004_at   | 1640930_at   | 1631321_s_at |
| 1640067_at   | 1623557_at   | 1623407_at   | 1633916_at   | 1624134_a_at | 1635508_at   |
| 1641102_at   | 1629217_at   | 1625348_s_at | 1626858_a_at | 1637447_at   | 1626613_at   |

|              |              |              |              |              |              |
|--------------|--------------|--------------|--------------|--------------|--------------|
| 1641006_s_at | 1625114_at   | 1624638_a_at | 1628281_at   | 1631286_at   | 1635240_at   |
| 1625514_s_at | 1635923_at   | 1628669_at   | 1641348_at   | 1623501_at   | 1627022_at   |
| 1637994_at   | 1641632_at   | 1630270_s_at | 1629752_at   | 1627028_at   | 1633805_a_at |
| 1631067_at   | 1633574_at   | 1632264_at   | 1628604_at   | 1640281_s_at | 1628476_at   |
| 1635632_at   | 1635572_at   | 1627339_at   | 1641170_a_at | 1640426_at   | 1633369_s_at |
| 1626906_at   | 1630076_at   | 1632332_at   | 1637713_at   | 1633301_at   | 1634362_a_at |
| 1627439_at   | 1628991_at   | 1635248_at   | 1625869_at   | 1628998_at   | 1629546_at   |
| 1640201_at   | 1625465_a_at | 1628694_a_at | 1627566_a_at | 1641516_at   | 1641722_at   |
| 1639748_at   | 1629886_s_at | 1628109_at   | 1638846_at   | 1637198_at   | 1637847_at   |
| 1624287_at   | 1632458_at   | 1639147_s_at | 1632584_at   | 1623175_at   | 1628258_at   |
| 1634882_at   | 1635269_at   | 1631083_at   | 1629122_at   | 1631344_at   | 1633466_at   |
| 1630469_a_at | 1626482_a_at | 1636523_at   | 1638311_at   | 1624139_at   | 1624378_at   |
| 1623438_at   | 1633962_a_at | 1631393_at   | 1626197_at   | 1630370_at   | 1630327_at   |
| 1638652_at   | 1638235_at   | 1632756_at   | 1626522_at   | 1630487_s_at | 1624389_at   |
| 1641384_a_at | 1625263_at   | 1625850_at   | 1641465_at   | 1627209_at   | 1635335_at   |
| 1629023_s_at | 1635305_s_at | 1629848_s_at | 1638140_at   | 1625126_at   | 1632484_at   |
| 1631867_at   | 1623122_at   | 1637048_at   | 1633128_at   | 1639677_at   | 1640751_at   |
| 1641471_at   | 1627551_s_at | 1636866_at   | 1635293_s_at | 1634008_at   | 1633170_at   |
| 1636920_s_at | 1628957_at   | 1626096_at   | 1623535_at   | 1636368_at   | 1623119_at   |
| 1629400_at   | 1639372_s_at | 1634927_at   | 1626444_at   | 1626829_s_at | 1633282_at   |
| 1627564_s_at | 1636556_at   | 1627697_at   | 1631593_at   | 1629569_at   | 1637110_at   |

|              |              |              |              |              |              |
|--------------|--------------|--------------|--------------|--------------|--------------|
| 1633821_at   | 1633823_at   | 1631812_at   | 1636207_at   | 1624158_at   | 1639109_a_at |
| 1626418_a_at | 1628438_at   | 1637787_a_at | 1638494_at   | 1640361_at   | 1636218_at   |
| 1638092_a_at | 1630907_at   | 1634482_at   | 1623633_at   | 1640822_s_at | 1626965_at   |
| 1627435_at   | 1641262_at   | 1625330_at   | 1624870_at   | 1628631_at   | 1627421_at   |
| 1633102_at   | 1628072_at   | 1630416_at   | 1635595_at   | 1625986_at   | 1626834_at   |
| 1640897_at   | 1641103_at   | 1628337_at   | 1630683_at   | 1623182_at   | 1630663_a_at |
| 1632912_s_at | 1641456_at   | 1635177_at   | 1631909_at   | 1625925_at   | 1624981_a_at |
| 1629690_at   | 1639552_s_at | 1629708_at   | 1625204_a_at | 1623100_at   | 1632804_at   |
| 1623689_a_at | 1627133_at   | 1637723_at   | 1626684_at   | 1634572_at   | 1631385_at   |
| 1640495_at   | 1629153_s_at | 1635815_at   | 1624124_at   | 1639630_at   | 1628128_at   |
| 1635523_a_at | 1625609_at   | 1623695_a_at | 1630265_at   | 1639949_s_at | 1635409_at   |
| 1624007_at   | 1640673_at   | 1628570_at   | 1636457_at   | 1639614_s_at | 1629005_a_at |
| 1628871_at   | 1640082_at   | 1623672_at   | 1623556_at   | 1632634_at   | 1630102_at   |
| 1626602_at   | 1624559_a_at | 1640104_at   | 1641089_s_at | 1635175_at   | 1623874_at   |
| 1624236_at   | 1638201_at   | 1635099_at   | 1635358_at   | 1628423_at   | 1636490_at   |
| 1626845_at   | 1639667_at   | 1630447_at   | 1636182_a_at | 1632724_at   | 1633860_at   |
| 1623853_at   | 1630089_at   | 1626622_at   | 1630780_a_at | 1624307_at   | 1632980_at   |
| 1632655_at   | 1624688_at   | 1630096_at   | 1635327_at   | 1633665_at   | 1641620_s_at |
| 1624890_s_at | 1639775_at   | 1630677_at   | 1622981_at   | 1631755_at   | 1634082_at   |
| 1638119_at   | 1633943_at   | 1634598_a_at | 1627131_at   | 1623543_at   | 1636039_at   |
| 1640044_at   | 1634503_at   | 1625325_s_at | 1628429_at   | 1630566_at   | 1631458_at   |



|              |              |              |              |              |              |
|--------------|--------------|--------------|--------------|--------------|--------------|
| 1634628_at   | 1629091_at   | 1623531_at   | 1635633_s_at | 1626278_at   | 1638113_at   |
| 1641192_at   | 1636308_at   | 1638439_a_at | 1634319_at   | 1623293_at   | 1626037_at   |
| 1631480_at   | 1636299_at   | 1634917_at   | 1634746_at   | 1627532_at   | 1629040_at   |
| 1632802_at   | 1630453_at   | 1636364_a_at | 1623433_at   | 1629410_at   | 1640921_at   |
| 1625488_s_at | 1631733_at   | 1634515_at   | 1627901_a_at | 1631833_at   | 1633723_at   |
| 1636161_at   | 1633479_a_at | 1639319_at   | 1640214_at   | 1640415_at   | 1631379_a_at |
| 1640466_s_at | 1636978_at   | 1640559_at   | 1629584_at   | 1629678_a_at | 1625951_at   |
| 1632615_at   | 1636056_at   | 1637256_at   | 1639644_at   | 1633331_at   | 1639246_at   |
| 1636064_at   | 1636520_s_at | 1628504_at   | 1636234_at   | 1628362_s_at | 1629881_at   |
| 1633398_at   | 1640468_a_at | 1627333_at   | 1623638_a_at | 1625214_at   | 1636168_s_at |
| 1636373_at   | 1635718_at   | 1632152_at   | 1638874_at   | 1636868_at   | 1639782_at   |
| 1624658_at   | 1626433_at   | 1637602_at   | 1629661_at   | 1625904_at   | 1628643_at   |
| 1636092_a_at | 1633464_at   | 1636784_at   | 1631676_at   | 1633701_at   | 1629743_at   |
| 1629324_at   | 1638382_at   | 1630165_s_at | 1632736_at   | 1627470_at   | 1634201_at   |
| 1622956_at   | 1626556_at   | 1638898_at   | 1634244_s_at | 1638133_at   | 1636943_s_at |
| 1624932_at   | 1624353_at   | 1631940_s_at | 1634214_a_at | 1624262_at   | 1635596_at   |
| 1637887_at   | 1626657_a_at | 1639201_at   | 1630056_at   | 1623579_at   | 1624772_at   |
| 1633220_at   | 1633985_at   | 1627109_at   | 1637440_at   | 1637584_at   | 1637654_at   |
| 1625706_at   | 1634108_at   | 1624564_s_at | 1626248_at   | 1624732_at   | 1628516_at   |
| 1636811_at   | 1630064_at   | 1636575_s_at | 1623914_at   | 1632717_a_at | 1627944_a_at |
| 1639874_at   | 1635853_at   | 1639270_at   | 1634855_s_at | 1630685_at   | 1633451_at   |

|              |              |              |              |              |              |
|--------------|--------------|--------------|--------------|--------------|--------------|
| 1638568_s_at | 1634313_s_at | 1633310_at   | 1624644_a_at | 1627211_at   | 1629188_at   |
| 1623928_at   | 1638121_at   | 1636406_at   | 1635143_at   | 1625413_s_at | 1625862_x_at |
| 1641315_at   | 1634113_at   | 1639522_at   | 1639259_at   | 1641204_at   | 1632083_at   |
| 1624284_a_at | 1636464_at   | 1632829_at   | 1629859_s_at | 1632811_at   | 1634705_at   |
| 1631279_at   | 1625889_at   | 1627105_at   | 1623842_a_at | 1637600_at   | 1636048_at   |
| 1638513_s_at | 1626570_s_at | 1633022_at   | 1630977_at   | 1637509_s_at | 1639029_at   |
| 1641708_at   | 1627744_at   | 1630995_at   | 1641197_at   | 1634833_at   | 1635628_s_at |
| 1623814_at   | 1625758_s_at | 1632872_at   | 1624272_at   | 1627101_at   | 1634079_at   |
| 1627409_at   | 1625050_s_at | 1625164_at   | 1626276_at   | 1629257_s_at | 1640966_at   |
| 1629417_s_at | 1639488_at   | 1632246_at   | 1631565_a_at | 1630779_s_at | 1625499_at   |
| 1627020_at   | 1629844_s_at | 1628274_a_at | 1627966_s_at | 1637848_at   | 1633800_s_at |
| 1633147_at   | 1623294_at   | 1624143_a_at | 1627371_at   | 1636305_a_at | 1623891_at   |
| 1624551_at   | 1630657_at   | 1623365_at   | 1635427_a_at | 1623436_a_at | 1624301_at   |
| 1629418_s_at | 1638964_at   | 1640512_at   | 1641703_at   | 1634514_at   | 1634509_s_at |
| 1640297_at   | 1635863_at   | 1627693_at   | 1637679_s_at | 1625767_at   | 1641289_at   |
| 1636176_at   | 1638581_at   | 1631783_at   | 1635268_at   | 1626565_at   | 1624586_a_at |
| 1623864_at   | 1626619_at   | 1639892_at   | 1636125_a_at | 1633578_a_at | 1627999_s_at |
| 1624717_s_at | 1626441_at   | 1634650_at   | 1634321_s_at | 1636666_at   | 1630457_s_at |
| 1624957_a_at | 1625291_s_at | 1623322_at   | 1632220_s_at | 1634814_at   | 1637574_at   |
| 1624478_at   | 1640922_a_at | 1630559_at   | 1637180_at   | 1624901_at   | 1636898_at   |
| 1622892_s_at | 1638851_at   | 1634976_at   | 1623340_at   | 1623257_a_at | 1640479_at   |

|              |              |              |              |              |              |
|--------------|--------------|--------------|--------------|--------------|--------------|
| 1639218_s_at | 1624751_at   | 1630703_at   | 1623783_at   | 1639365_at   | 1625199_s_at |
| 1629378_at   | 1633885_s_at | 1639377_at   | 1630323_at   | 1632782_a_at | 1626536_at   |
| 1637022_at   | 1641011_at   | 1638883_at   | 1622917_a_at | 1635310_s_at | 1626404_a_at |
| 1635667_at   | 1636822_s_at | 1635237_at   | 1628256_at   | 1637904_at   | 1634614_at   |
| 1638762_at   | 1637041_a_at | 1634155_at   | 1624420_at   | 1637328_at   | 1636084_at   |
| 1629911_at   | 1624624_at   | 1640373_at   | 1627110_at   | 1631195_at   | 1638524_s_at |
| 1639074_at   | 1629789_at   | 1626945_at   | 1624502_a_at | 1634295_at   | 1625020_at   |
| 1629549_s_at | 1623542_at   | 1637141_at   | 1626399_at   | 1629007_at   | 1641075_at   |
| 1632818_at   | 1636698_at   | 1637327_at   | 1634282_s_at | 1627737_at   | 1641215_s_at |
| 1631325_at   | 1638828_a_at | 1634994_a_at | 1628112_at   | 1627911_at   | 1633532_at   |
| 1631333_s_at | 1633512_at   | 1631738_at   | 1630667_at   | 1627204_at   | 1636266_at   |
| 1630715_at   | 1630358_at   | 1635587_s_at | 1637782_at   | 1628984_s_at | 1631346_a_at |
| 1633042_at   | 1632402_at   | 1635013_s_at | 1626879_at   | 1623969_at   | 1626881_at   |
| 1640344_at   | 1623813_at   | 1628474_at   | 1640938_at   | 1629163_at   | 1638664_s_at |
| 1638598_at   | 1634934_at   | 1633598_at   | 1636248_at   | 1623165_at   | 1629313_at   |
| 1640019_at   | 1641363_at   | 1625607_s_at | 1639787_at   | 1640055_at   | 1628660_at   |
| 1628716_at   | 1632834_a_at | 1636620_s_at | 1624916_a_at | 1627798_at   | 1638446_a_at |
| 1635946_at   | 1628644_at   | 1623422_a_at | 1631644_at   | 1631790_at   | 1623295_at   |
| 1634711_at   | 1640217_at   | 1632765_at   | 1640650_at   | 1633154_at   | 1637746_at   |
| 1627741_at   | 1632946_at   | 1625184_at   | 1632835_at   | 1635056_at   | 1625568_a_at |
| 1640218_at   | 1637741_a_at | 1635727_a_at | 1627305_at   | 1627221_at   | 1637854_at   |

|              |              |              |              |              |              |
|--------------|--------------|--------------|--------------|--------------|--------------|
| 1635046_at   | 1630373_at   | 1626664_at   | 1623857_at   | 1636502_at   | 1633654_s_at |
| 1636957_s_at | 1641463_at   | 1632168_at   | 1638858_at   | 1626797_a_at | 1640237_a_at |
| 1629889_s_at | 1631467_at   | 1631942_at   | 1633794_a_at | 1633618_at   | 1638005_s_at |
| 1628974_at   | 1633934_at   | 1633763_at   | 1628711_at   | 1640976_at   | 1637136_at   |
| 1638800_a_at | 1627426_at   | 1625394_at   | 1622957_s_at | 1627373_at   | 1624632_at   |
| 1625650_at   | 1635110_at   | 1637107_at   | 1628980_s_at | 1634866_at   | 1638861_at   |
| 1637169_at   | 1623150_at   | 1630896_at   | 1640600_at   | 1624824_at   | 1623459_at   |
| 1640582_at   | 1640507_s_at | 1638520_at   | 1630455_at   | 1630365_at   | 1633477_at   |
| 1629104_at   | 1629854_at   | 1624637_at   | 1626076_at   | 1631434_at   | 1626006_at   |
| 1625487_at   | 1625922_a_at | 1637774_s_at | 1633643_a_at | 1638758_at   | 1634962_s_at |
| 1631772_a_at | 1630087_at   | 1625519_at   | 1633450_at   | 1627134_at   | 1634640_at   |
| 1635647_at   | 1629948_at   | 1639093_s_at | 1632095_at   | 1635054_at   | 1625675_a_at |
| 1633057_at   | 1637415_at   | 1629715_at   | 1636849_at   | 1639436_at   | 1634080_at   |
| 1635694_at   | 1640789_a_at | 1641556_a_at | 1641400_at   | 1636128_at   | 1630273_at   |
| 1638908_at   | 1638185_at   | 1628257_s_at | 1634900_at   | 1628169_at   | 1637763_a_at |
| 1637983_s_at | 1639341_at   | 1627118_at   | 1640229_at   | 1622982_at   | 1629574_at   |
| 1637647_at   | 1623836_at   | 1629240_at   | 1624892_s_at | 1622979_a_at | 1626002_at   |
| 1626052_at   | 1631367_at   | 1623896_a_at | 1624605_at   | 1627059_at   | 1639079_at   |
| 1634118_at   | 1627749_at   | 1636921_at   | 1629207_at   | 1634405_s_at | 1641564_a_at |
| 1638939_at   | 1634182_at   | 1635872_at   | 1639253_at   | 1625060_at   | 1637811_s_at |
| 1627997_at   | 1633067_at   | 1628811_at   | 1623032_at   | 1625816_at   | 1628325_at   |

|            |              |              |              |              |              |
|------------|--------------|--------------|--------------|--------------|--------------|
| 1625365_at | 1630682_at   | 1641027_at   | 1631022_at   | 1636253_at   | 1624330_s_at |
| 1631806_at | 1635758_s_at | 1640169_s_at | 1638274_s_at | 1631101_at   | 1627050_at   |
| 1633196_at | 1633669_at   | 1623288_at   | 1635300_at   | 1633960_at   | 1628800_at   |
| 1627553_at | 1637515_s_at | 1633604_at   | 1636296_at   | 1629972_at   | 1625640_a_at |
| 1633234_at | 1635498_at   | 1624291_at   | 1635971_at   | 1633435_a_at |              |

\*\*\*\*\*

Inb Effects DOWN regulated FDR < 0.1

|              |              |              |              |              |              |
|--------------|--------------|--------------|--------------|--------------|--------------|
| 1626166_at   | 1634009_at   | 1623867_at   | 1626893_at   | 1625154_s_at | 1626645_at   |
| 1637239_s_at | 1627835_a_at | 1634439_at   | 1639838_at   | 1640501_at   | 1637900_at   |
| 1639229_at   | 1634418_at   | 1628712_at   | 1632032_at   | 1633690_at   | 1632011_at   |
| 1628261_at   | 1623068_at   | 1641581_at   | 1623452_at   | 1625116_at   | 1640059_at   |
| 1630670_at   | 1639823_at   | 1640681_at   | 1632328_at   | 1641324_at   | 1630430_a_at |
| 1625297_at   | 1639130_a_at | 1632666_at   | 1624525_at   | 1639351_at   | 1641442_a_at |
| 1631387_at   | 1635793_at   | 1637077_s_at | 1633355_at   | 1625761_a_at | 1632854_s_at |
| 1640285_at   | 1634165_at   | 1625409_at   | 1633033_s_at | 1633882_at   | 1640715_at   |
| 1623019_a_at | 1635639_a_at | 1633303_at   | 1625400_at   | 1639469_a_at | 1631639_at   |
| 1631522_x_at | 1637366_at   | 1639317_at   | 1629919_at   | 1637113_s_at | 1634036_at   |
| 1638554_at   | 1639439_at   | 1623238_at   | 1639110_at   | 1637483_at   | 1640892_a_at |
| 1637123_a_at | 1637103_at   | 1637701_at   | 1629885_at   | 1632434_at   | 1640107_at   |
| 1628398_at   | 1641558_at   | 1632964_at   | 1632432_at   | 1630515_s_at | 1638207_at   |
| 1630150_s_at | 1630171_at   | 1640223_a_at | 1636338_at   | 1631280_at   | 1633740_at   |
| 1624035_a_at | 1624121_at   | 1625183_at   | 1640181_at   | 1630252_at   | 1633272_at   |
| 1627583_at   | 1629559_s_at | 1623757_at   | 1626709_at   | 1630065_at   | 1624979_at   |
| 1630402_at   | 1637391_at   | 1630261_a_at | 1638733_at   | 1637504_at   | 1637194_at   |
| 1626953_at   | 1624982_s_at | 1625210_a_at | 1631285_at   | 1641325_s_at | 1640224_s_at |
| 1639979_at   | 1638240_s_at | 1641607_at   | 1637914_at   | 1623160_at   | 1628080_at   |
| 1638327_a_at | 1641413_s_at | 1637097_at   | 1639636_at   | 1631217_a_at | 1624705_a_at |

|              |              |              |              |              |              |
|--------------|--------------|--------------|--------------|--------------|--------------|
| 1625588_s_at | 1638004_at   | 1639418_at   | 1634846_a_at | 1626016_s_at | 1633167_s_at |
| 1636775_at   | 1639928_a_at | 1637645_at   | 1624830_at   | 1624488_a_at | 1633400_at   |
| 1625071_a_at | 1624398_at   | 1630085_s_at | 1623693_a_at | 1629551_s_at | 1627986_s_at |
| 1626429_at   | 1630100_at   | 1640629_s_at | 1622974_at   | 1623234_s_at | 1632527_at   |
| 1623490_at   | 1635252_a_at | 1640462_at   | 1641291_at   | 1629077_s_at | 1635460_a_at |
| 1638896_at   | 1623984_s_at | 1632091_at   | 1635253_a_at | 1634955_at   | 1624826_at   |
| 1631474_s_at | 1634269_at   | 1626442_at   | 1634075_at   | 1639252_s_at | 1624157_at   |
| 1634739_a_at | 1633285_at   | 1637335_at   | 1635483_at   | 1626397_at   | 1633434_at   |
| 1631380_s_at | 1627352_at   | 1632967_s_at | 1623200_at   | 1629317_at   | 1630044_s_at |
| 1627394_s_at | 1623252_a_at | 1625542_a_at | 1623517_at   | 1640798_a_at | 1635140_at   |
| 1632475_at   | 1631620_at   | 1636028_at   | 1623851_at   | 1637801_at   | 1623037_a_at |
| 1623558_at   | 1633696_at   | 1635025_a_at | 1629235_s_at | 1635936_at   | 1632932_a_at |
| 1634440_s_at | 1638400_at   | 1633452_a_at | 1633344_at   | 1624774_a_at | 1627818_s_at |
| 1638475_a_at | 1631628_s_at | 1630501_a_at | 1632757_a_at | 1634162_at   | 1623083_at   |
| 1632898_at   | 1629538_s_at | 1630231_at   | 1637634_at   | 1634188_a_at | 1630707_at   |
| 1632380_at   | 1627287_at   | 1631925_at   | 1638472_at   | 1625908_a_at | 1629318_at   |
| 1638079_at   | 1624432_at   | 1634707_s_at | 1641018_s_at | 1634063_a_at | 1623445_at   |
| 1626294_a_at | 1640991_at   | 1624340_at   | 1639778_at   | 1634156_at   | 1634906_at   |
| 1628105_a_at | 1635398_at   | 1631302_at   | 1636274_at   | 1640754_at   | 1629423_at   |
| 1629876_at   | 1631724_s_at | 1631468_a_at | 1633481_at   | 1635678_at   | 1628766_at   |
| 1641310_at   | 1641109_at   | 1639596_at   | 1633264_at   | 1635161_at   | 1616608_a_at |

|              |              |              |              |              |              |
|--------------|--------------|--------------|--------------|--------------|--------------|
| 1635208_at   | 1626740_at   | 1632705_at   | 1641167_s_at | 1638009_s_at | 1630156_at   |
| 1635584_s_at | 1625312_at   | 1623225_s_at | 1638892_at   | 1624505_at   | 1632204_at   |
| 1634310_at   | 1641598_at   | 1637548_at   | 1638276_at   | 1636813_s_at | 1639513_at   |
| 1633293_at   | 1636414_at   | 1630169_a_at | 1641171_at   | 1627927_at   | 1630695_at   |
| 1627493_at   | 1633480_at   | 1626521_x_at | 1627893_at   | 1629553_at   | 1638940_at   |
| 1625752_at   | 1634417_s_at | 1627962_at   | 1640235_at   | 1629065_s_at | 1638368_at   |
| 1629446_at   | 1630957_s_at | 1623212_s_at | 1634144_at   | 1637792_at   | 1624310_s_at |
| 1638067_a_at | 1638044_a_at | 1632119_s_at | 1633463_s_at | 1630129_at   | 1640303_a_at |
| 1623151_a_at | 1637943_at   | 1624776_a_at | 1628235_at   | 1624219_s_at | 1641474_s_at |
| 1640526_at   | 1638681_at   | 1637538_s_at | 1626088_at   | 1638050_s_at | 1637412_a_at |
| 1626473_a_at | 1630201_a_at | 1634374_at   | 1625992_s_at | 1623624_at   | 1634893_at   |
| 1624929_at   | 1630589_at   | 1636747_at   | 1640322_at   | 1638008_s_at | 1634447_at   |
| 1636461_at   | 1623827_a_at | 1641333_s_at | 1627632_at   | 1629342_s_at | 1640286_at   |
| 1628909_at   | 1639592_at   | 1637813_at   | 1637421_at   | 1629015_a_at | 1635072_at   |
| 1623957_s_at | 1639637_a_at | 1638365_at   | 1623177_at   | 1637545_at   | 1636626_s_at |
| 1630575_at   | 1634684_at   | 1630160_at   | 1639033_at   | 1630698_at   | 1629396_a_at |
| 1626446_a_at | 1640854_at   | 1631524_a_at | 1626700_at   | 1638810_at   | 1631046_s_at |
| 1626727_at   | 1625211_s_at | 1640523_at   | 1625692_s_at | 1623588_at   | 1641587_at   |
| 1625778_at   | 1636247_at   | 1631566_at   | 1631359_s_at | 1634668_at   | 1639123_at   |
| 1638529_at   | 1632403_at   | 1637460_at   | 1637133_x_at | 1625980_at   | 1631377_a_at |
| 1640131_a_at | 1628652_at   | 1634546_at   | 1631487_s_at | 1625491_at   | 1625652_s_at |



|              |              |              |              |              |              |
|--------------|--------------|--------------|--------------|--------------|--------------|
| 1627278_s_at | 1633597_at   | 1625442_a_at | 1635788_a_at | 1624873_at   | 1626481_a_at |
| 1637246_a_at | 1630979_at   | 1627000_s_at | 1633157_a_at | 1635975_s_at | 1632117_s_at |
| 1638457_at   | 1630563_at   | 1623516_s_at | 1637057_at   | 1625370_s_at | 1630456_at   |
| 1624029_at   | 1625584_at   | 1625401_at   | 1625215_s_at | 1628536_s_at | 1624752_at   |
| 1632317_at   | 1636961_a_at | 1626431_at   | 1625825_at   | 1635229_at   | 1626543_at   |
| 1638515_at   | 1640175_at   | 1637018_at   | 1626089_at   | 1634210_at   | 1628840_at   |
| 1629944_at   | 1634818_s_at | 1629034_at   | 1636528_at   | 1630509_at   | 1630052_s_at |
| 1629798_at   | 1625392_at   | 1634170_a_at | 1630874_s_at | 1634250_at   | 1632028_a_at |
| 1635538_at   | 1633427_at   | 1637414_at   | 1634606_a_at | 1640350_at   | 1628927_at   |
| 1633290_a_at | 1623753_at   | 1637737_at   | 1634794_at   | 1629676_at   | 1626694_at   |
| 1625885_at   | 1626609_at   | 1641688_at   | 1637531_at   | 1633432_at   | 1641049_at   |
| 1630802_at   | 1632285_at   | 1639585_a_at | 1640838_s_at | 1629907_at   | 1634329_at   |
| 1630968_at   | 1636598_s_at | 1637739_at   | 1633329_at   | 1636377_at   | 1636057_at   |
| 1630807_at   | 1631765_at   | 1625148_s_at | 1627054_at   | 1638593_a_at | 1635861_a_at |
| 1639364_at   | 1629837_at   | 1631318_at   | 1638639_a_at | 1627963_s_at | 1631119_at   |
| 1637678_at   | 1637669_at   | 1633752_at   | 1629691_at   | 1633718_at   | 1633931_a_at |
| 1627018_s_at | 1636348_s_at | 1626323_s_at | 1634129_at   | 1633336_at   | 1635000_at   |
| 1636548_at   | 1627129_at   | 1632543_at   | 1629597_a_at | 1640445_at   | 1631584_at   |
| 1639203_at   | 1625717_s_at | 1640252_at   | 1639255_s_at | 1624069_at   | 1634989_at   |
| 1628938_at   | 1624662_at   | 1636591_at   | 1626774_s_at | 1630598_at   | 1637359_at   |
| 1641501_a_at | 1630062_a_at | 1637349_at   | 1639788_at   | 1639145_s_at | 1627376_at   |

|              |              |              |              |              |              |
|--------------|--------------|--------------|--------------|--------------|--------------|
| 1632558_at   | 1641575_at   | 1634783_s_at | 1628705_at   | 1629804_s_at | 1628531_at   |
| 1634191_at   | 1632989_a_at | 1624441_at   | 1638722_at   | 1637499_s_at | 1636445_at   |
| 1631237_s_at | 1635591_at   | 1636321_s_at | 1638876_at   | 1635352_s_at | 1637024_at   |
| 1623714_at   | 1630668_a_at | 1626336_at   | 1639454_at   | 1625672_s_at | 1629123_at   |
| 1634458_at   | 1637109_s_at | 1636264_at   | 1639306_s_at | 1639242_a_at | 1631252_a_at |
| 1625537_at   | 1633109_at   | 1630088_at   | 1635226_at   | 1623073_s_at | 1625245_at   |
| 1631695_at   | 1635611_a_at | 1636622_at   | 1640472_at   | 1627971_s_at | 1630002_s_at |
| 1627430_at   | 1629441_at   | 1630418_s_at | 1632455_at   | 1629581_at   | 1638736_at   |
| 1624256_at   | 1641490_s_at | 1622906_at   | 1623446_a_at | 1637816_s_at | 1624517_at   |
| 1629648_s_at | 1639233_at   | 1636902_at   | 1632963_at   | 1625412_at   | 1640465_at   |
| 1629201_at   | 1639338_at   | 1623884_at   | 1635416_at   | 1638721_s_at | 1638703_a_at |
| 1630570_at   | 1625857_at   | 1628668_at   | 1638592_at   | 1633535_at   | 1641635_s_at |
| 1638244_s_at | 1634961_s_at | 1640375_at   | 1638953_a_at | 1631028_s_at | 1629499_at   |
| 1629937_a_at | 1627400_a_at | 1640159_at   | 1624969_s_at | 1638324_s_at | 1633108_at   |
| 1635730_at   | 1635057_s_at | 1627834_a_at | 1626513_at   | 1632409_a_at | 1635104_s_at |
| 1626077_s_at | 1635376_at   | 1625278_s_at | 1626025_at   | 1633673_a_at | 1635677_a_at |
| 1624649_a_at | 1634654_at   | 1630476_s_at | 1623398_at   | 1623669_at   | 1640872_at   |
| 1627719_at   | 1635661_at   | 1637971_a_at | 1632596_at   | 1640928_at   | 1639335_at   |
| 1639508_a_at | 1637481_at   | 1633227_s_at | 1627855_at   | 1639477_s_at | 1633599_a_at |
| 1624407_s_at | 1626509_at   | 1628992_at   | 1623164_a_at | 1631402_s_at | 1632979_at   |
| 1627761_at   | 1625434_at   | 1632345_at   | 1628107_at   | 1641312_at   | 1636521_at   |

|              |              |              |              |              |              |
|--------------|--------------|--------------|--------------|--------------|--------------|
| 1641578_at   | 1630256_at   | 1638052_at   | 1641228_a_at | 1638947_at   | 1630034_at   |
| 1638807_s_at | 1623991_s_at | 1634339_at   | 1630791_a_at | 1641063_s_at | 1631055_at   |
| 1624273_at   | 1629070_at   | 1623678_at   | 1635828_at   | 1634649_at   | 1630946_at   |
| 1635745_a_at | 1626113_at   | 1636383_at   | 1626143_a_at | 1625866_at   | 1623274_s_at |
| 1641599_at   | 1641506_at   | 1627964_s_at | 1637286_a_at | 1632228_at   | 1636960_a_at |
| 1636677_s_at | 1623626_a_at | 1625076_at   | 1623199_a_at | 1637016_at   | 1630433_at   |
| 1624251_a_at | 1637341_at   | 1639660_s_at | 1641495_at   | 1626124_at   | 1623357_at   |
| 1625023_a_at | 1634364_s_at | 1632838_at   | 1629345_at   | 1639347_s_at | 1637301_a_at |
| 1628696_at   | 1627633_at   | 1630147_at   | 1638246_at   | 1636112_s_at | 1628323_s_at |
| 1636068_a_at | 1624321_at   | 1625373_at   | 1625471_s_at | 1633533_at   | 1624207_at   |
| 1634152_at   | 1631535_at   | 1631419_at   | 1624322_at   | 1629745_at   | 1637064_at   |
| 1625433_at   | 1624393_at   | 1628027_a_at | 1636718_s_at | 1632216_at   | 1641320_s_at |
| 1625757_at   | 1625511_at   | 1637957_s_at | 1630941_s_at | 1630752_at   | 1626637_a_at |
| 1626841_s_at | 1637036_s_at | 1624715_at   | 1635500_a_at | 1633582_at   | 1636603_a_at |
| 1636302_s_at | 1640809_at   | 1633965_at   | 1632633_at   | 1627228_at   | 1634599_s_at |
| 1635321_at   | 1626990_s_at | 1641464_s_at | 1633473_s_at | 1623910_at   | 1636772_s_at |
| 1625453_a_at | 1628867_s_at | 1641026_a_at | 1626560_at   | 1631050_at   | 1638109_s_at |
| 1634249_s_at | 1623740_at   | 1628645_at   | 1635007_at   | 1628915_s_at | 1640834_at   |
| 1632734_s_at | 1634877_at   | 1631569_s_at | 1624347_s_at | 1638205_s_at | 1627270_at   |
| 1633002_at   | 1631454_a_at | 1637076_at   | 1634148_at   | 1640409_at   | 1630520_s_at |
| 1624439_at   | 1625324_at   | 1635728_a_at | 1627256_s_at | 1624695_at   | 1636798_at   |

|              |              |              |              |              |              |
|--------------|--------------|--------------|--------------|--------------|--------------|
| 1625007_a_at | 1624849_at   | 1635390_s_at | 1638854_s_at | 1638154_at   | 1641066_s_at |
| 1632916_at   | 1627732_s_at | 1628385_a_at | 1636569_a_at | 1627515_at   | 1636762_a_at |
| 1626534_at   | 1630984_at   | 1632790_at   | 1634270_at   | 1629566_at   | 1627197_at   |
| 1627043_at   | 1623503_at   | 1635998_at   | 1636682_at   | 1639946_at   | 1637428_a_at |
| 1630788_at   | 1635188_at   | 1625897_s_at | 1638818_at   | 1624851_at   | 1633513_a_at |
| 1636669_at   | 1640162_at   | 1630774_s_at | 1639305_a_at | 1639363_at   | 1628469_a_at |
| 1639245_x_at | 1631323_a_at | 1623858_at   | 1633770_at   | 1624012_at   | 1637769_s_at |
| 1624362_at   | 1622995_at   | 1634792_s_at | 1635378_at   | 1640952_at   | 1635705_at   |
| 1633021_s_at | 1624183_a_at | 1638100_s_at | 1636487_at   | 1628489_at   | 1626884_a_at |
| 1628465_a_at | 1640397_at   | 1640204_at   | 1632481_at   | 1629086_s_at | 1633732_at   |
| 1634096_at   | 1625618_at   | 1630286_at   | 1624021_a_at | 1623144_at   | 1628573_a_at |
| 1640710_at   | 1622898_a_at | 1626885_at   | 1640242_s_at | 1635267_s_at | 1632498_at   |
| 1625637_at   | 1633088_at   | 1625131_s_at | 1626743_at   | 1635918_at   | 1629813_at   |
| 1637172_at   | 1635583_s_at | 1632221_at   | 1629981_at   | 1635819_at   | 1633144_at   |
| 1624971_at   | 1641378_at   | 1626261_s_at | 1626666_s_at | 1634053_at   | 1624203_s_at |
| 1635210_a_at | 1639095_at   | 1632943_a_at | 1623227_s_at | 1631320_at   | 1639609_s_at |
| 1631499_a_at | 1626488_s_at | 1626581_s_at | 1629797_at   | 1635507_at   | 1636026_at   |
| 1630857_s_at | 1634991_at   | 1628214_at   | 1637821_at   | 1640624_s_at | 1641118_at   |
| 1635681_at   | 1626812_at   | 1633032_s_at | 1630865_s_at | 1640534_s_at | 1626303_s_at |
| 1625544_s_at | 1624361_s_at | 1627636_at   | 1641328_at   | 1627288_a_at | 1628363_at   |
| 1625901_s_at | 1633553_s_at | 1625264_s_at | 1625880_at   | 1637405_at   | 1627044_s_at |

|              |              |              |              |              |              |
|--------------|--------------|--------------|--------------|--------------|--------------|
| 1628964_at   | 1625830_a_at | 1640256_at   | 1624704_at   | 1640886_a_at | 1625019_at   |
| 1634978_at   | 1628715_a_at | 1627410_at   | 1640896_at   | 1631112_at   | 1635403_at   |
| 1629996_at   | 1625476_a_at | 1636025_at   | 1635914_at   | 1639121_at   | 1635005_a_at |
| 1631205_a_at | 1637463_a_at | 1624837_at   | 1624417_a_at | 1640879_at   | 1633494_at   |
| 1627500_at   | 1628432_at   | 1625762_s_at | 1628269_at   | 1639851_at   | 1625427_at   |
| 1632568_at   | 1637257_at   | 1624122_a_at | 1635963_a_at | 1640883_a_at | 1629573_at   |
| 1624132_at   | 1623666_at   | 1628543_a_at | 1636103_a_at | 1640729_s_at | 1633780_at   |
| 1625445_s_at | 1624185_at   | 1624086_at   | 1626970_at   | 1637975_at   | 1623664_at   |
| 1638619_s_at | 1635531_at   | 1638413_at   | 1630173_a_at | 1638726_at   | 1639597_at   |
| 1640835_a_at | 1633839_at   | 1635634_at   | 1628530_at   | 1637905_s_at | 1623959_at   |
| 1627651_a_at | 1638466_a_at | 1634869_at   | 1639826_at   | 1636759_at   | 1630593_at   |
| 1624190_at   | 1624410_at   | 1629145_at   | 1637430_s_at | 1628314_a_at | 1627802_s_at |
| 1640062_at   | 1639437_s_at | 1638893_at   | 1628950_at   | 1634733_at   | 1635375_at   |
| 1623555_at   | 1629308_at   | 1637385_a_at | 1628475_at   | 1633446_s_at | 1638558_a_at |
| 1635974_at   | 1626349_at   | 1636689_at   | 1635065_at   | 1635466_at   | 1634211_at   |
| 1624448_at   | 1624471_s_at | 1634187_x_at | 1633471_at   | 1637570_at   | 1634656_s_at |
| 1623931_s_at | 1626566_at   | 1638432_a_at | 1629511_at   | 1638338_a_at | 1640300_at   |
| 1625196_a_at | 1625719_at   | 1629843_s_at | 1635619_a_at | 1636196_s_at | 1633698_at   |
| 1641542_at   | 1632888_s_at | 1633935_at   | 1624300_s_at | 1640405_at   | 1636846_at   |
| 1633594_at   | 1627452_a_at | 1626759_at   | 1637149_s_at | 1625780_a_at | 1627930_s_at |
| 1633745_a_at | 1632840_s_at | 1632676_s_at | 1637478_s_at | 1640412_at   | 1634574_a_at |

|              |              |              |              |              |              |
|--------------|--------------|--------------|--------------|--------------|--------------|
| 1631273_at   | 1622937_at   | 1634899_a_at | 1630378_at   | 1632819_at   | 1631394_at   |
| 1628739_at   | 1637537_at   | 1631746_a_at | 1630721_s_at | 1639001_a_at | 1637874_at   |
| 1626086_at   | 1633385_at   | 1624142_a_at | 1625173_s_at | 1631594_s_at | 1640024_at   |
| 1632985_at   | 1627518_at   | 1641701_at   | 1635256_s_at | 1636436_at   | 1626452_at   |
| 1638186_a_at | 1635227_at   | 1623039_at   | 1632273_at   | 1630027_s_at | 1628613_a_at |
| 1631616_at   | 1629287_at   | 1632488_a_at | 1629887_at   | 1635011_at   | 1632945_at   |
| 1628726_s_at | 1638335_at   | 1634325_a_at | 1626940_at   | 1623837_at   | 1629744_a_at |
| 1623514_a_at | 1638809_at   | 1635501_at   | 1641169_s_at | 1636275_a_at | 1633515_s_at |
| 1623418_at   | 1623383_at   | 1639257_s_at | 1625369_at   | 1636311_at   | 1623518_s_at |
| 1628492_at   | 1638011_a_at | 1628763_at   | 1640491_at   | 1623589_a_at | 1640364_at   |
| 1636989_a_at | 1637853_a_at | 1626178_s_at | 1639482_a_at | 1624675_at   | 1631856_a_at |
| 1639507_at   | 1640470_s_at | 1625711_at   | 1633589_a_at | 1637492_at   | 1624044_at   |
| 1640228_at   | 1634102_at   | 1626821_s_at | 1623373_at   | 1623379_at   | 1634573_a_at |
| 1641111_s_at | 1631426_at   | 1635298_at   | 1629819_s_at | 1629890_a_at | 1625358_s_at |
| 1636337_s_at | 1623126_at   | 1635997_a_at | 1636157_at   | 1634315_a_at | 1632700_a_at |
| 1625997_s_at | 1634303_at   | 1635756_at   | 1627491_at   | 1634213_at   | 1626875_at   |
| 1635967_at   | 1639690_a_at | 1630925_at   | 1640372_at   | 1638956_at   | 1633149_at   |
| 1630938_a_at | 1623264_at   | 1636180_at   | 1633206_at   | 1639321_s_at | 1627220_at   |
| 1633983_a_at | 1637352_a_at | 1627629_at   | 1639900_at   | 1637190_at   | 1641191_s_at |
| 1627178_at   | 1638418_at   | 1628339_a_at | 1640918_at   | 1627886_at   | 1628618_at   |
| 1625604_at   | 1630313_a_at | 1623787_at   | 1623952_a_at | 1632841_x_at | 1635423_s_at |

|              |              |              |              |              |              |
|--------------|--------------|--------------|--------------|--------------|--------------|
| 1627402_a_at | 1633319_at   | 1637703_a_at | 1626138_s_at | 1634343_at   | 1636651_a_at |
| 1623261_at   | 1638716_a_at | 1635800_at   | 1632081_s_at | 1632163_at   | 1639676_at   |
| 1629803_a_at | 1639784_at   | 1636853_at   | 1638937_at   | 1625556_at   | 1641236_s_at |
| 1636918_a_at | 1633044_at   | 1639502_at   | 1640917_at   | 1640555_at   | 1633612_at   |
| 1640395_a_at | 1627302_at   | 1629169_at   | 1628743_at   | 1639722_s_at | 1636029_s_at |
| 1639091_at   | 1627647_at   | 1626805_s_at | 1626163_s_at | 1632658_a_at | 1629806_a_at |
| 1631388_at   | 1634633_s_at | 1625552_at   | 1629839_a_at | 1637560_at   | 1635199_at   |
| 1631399_a_at | 1638275_at   | 1641427_at   | 1634522_s_at | 1633135_s_at | 1636706_at   |
| 1632500_at   | 1625955_a_at | 1640417_a_at | 1640142_at   | 1636316_a_at | 1634925_at   |
| 1632339_s_at | 1637393_at   | 1628621_at   | 1632670_at   | 1639320_a_at | 1631750_a_at |
| 1641207_s_at | 1637772_at   | 1627227_at   | 1638866_at   | 1633401_s_at | 1639566_s_at |
| 1638412_at   | 1635976_at   | 1628466_s_at | 1634512_at   | 1625686_s_at | 1635266_at   |
| 1624331_at   | 1641202_at   | 1628032_a_at | 1632395_s_at | 1632094_at   | 1636219_at   |
| 1625847_at   | 1623849_s_at | 1626147_s_at | 1632815_at   | 1638508_at   | 1633280_s_at |
| 1632196_at   | 1637008_at   | 1639380_a_at | 1641226_a_at | 1635259_at   | 1638708_s_at |
| 1629129_at   | 1624720_s_at | 1635711_s_at | 1631704_at   | 1640266_a_at | 1628420_s_at |
| 1628207_at   | 1630101_s_at | 1625949_at   | 1638653_a_at | 1623690_at   | 1632852_s_at |
| 1627024_s_at | 1629858_at   | 1637506_at   | 1629647_at   | 1634971_at   | 1638176_at   |
| 1639733_s_at | 1628328_at   | 1625921_at   | 1624429_at   | 1627840_a_at | 1640048_s_at |
| 1640090_a_at | 1625594_s_at | 1623788_at   | 1630249_at   | 1637148_at   | 1628710_at   |
| 1627984_at   | 1625128_a_at | 1629411_at   | 1625249_at   | 1628146_at   | 1637987_at   |

|              |              |              |              |              |              |
|--------------|--------------|--------------|--------------|--------------|--------------|
| 1626706_at   | 1640907_at   | 1625140_at   | 1623197_a_at | 1636947_at   | 1635340_at   |
| 1637710_at   | 1635541_s_at | 1640797_at   | 1640496_at   | 1626038_at   | 1628873_s_at |
| 1631327_at   | 1633956_s_at | 1639571_s_at | 1634246_at   | 1635173_at   | 1627726_a_at |
| 1636145_at   | 1640932_s_at | 1641518_a_at | 1623276_at   | 1638673_at   | 1638521_a_at |
| 1636281_at   | 1626394_at   | 1630688_at   | 1633405_s_at | 1637684_at   | 1628149_a_at |
| 1630816_at   | 1626246_s_at | 1638727_at   | 1635652_at   | 1626449_s_at | 1632457_s_at |
| 1631456_at   | 1639763_at   | 1634675_s_at | 1633801_s_at | 1624541_at   | 1630531_at   |
| 1638903_at   | 1640092_a_at | 1626729_at   | 1624003_at   | 1626461_at   | 1623743_at   |
| 1626001_at   | 1639770_at   | 1637165_at   | 1627598_at   | 1628194_at   | 1623486_at   |
| 1640750_at   | 1625163_at   | 1632530_s_at | 1641609_at   | 1624042_at   | 1631274_at   |
| 1639396_s_at | 1629141_at   | 1633143_s_at | 1629852_at   | 1640337_a_at | 1635138_at   |
| 1637155_at   | 1639494_at   | 1636431_at   | 1622970_at   | 1626221_at   | 1623254_s_at |
| 1628488_at   | 1623843_at   | 1634065_s_at | 1638143_a_at | 1630450_s_at | 1630611_at   |
| 1628208_at   | 1635372_a_at | 1628306_at   | 1626456_at   | 1635638_s_at | 1628360_at   |
| 1625950_a_at | 1624943_at   | 1638345_at   | 1629372_a_at | 1632377_at   | 1630415_at   |
| 1638460_s_at | 1626554_at   | 1628358_at   | 1636183_at   | 1638872_at   | 1637294_at   |
| 1628675_at   | 1623881_s_at | 1630345_at   | 1634452_s_at | 1625827_s_at | 1634667_at   |
| 1634454_at   | 1641504_s_at | 1635260_at   | 1636926_s_at | 1634373_a_at | 1624240_at   |
| 1630186_at   | 1640083_at   | 1637411_s_at | 1628251_at   | 1634525_at   | 1635023_at   |
| 1636954_at   | 1631445_at   | 1636208_a_at | 1624755_a_at | 1628758_at   | 1626390_at   |
| 1636956_at   | 1627478_at   | 1630901_a_at | 1625750_at   | 1635961_at   | 1641297_at   |



|              |              |              |              |              |              |
|--------------|--------------|--------------|--------------|--------------|--------------|
| 1628458_at   | 1628777_at   | 1635202_s_at | 1623762_at   | 1631291_at   | 1641004_a_at |
| 1624976_at   | 1624447_s_at | 1629970_s_at | 1633795_a_at | 1638663_at   | 1633412_s_at |
| 1637652_a_at | 1637575_at   | 1640833_at   | 1635127_at   | 1637557_a_at | 1629748_s_at |
| 1623863_a_at | 1627006_at   | 1637778_a_at | 1633009_a_at | 1632526_s_at | 1630280_s_at |
| 1626624_s_at | 1639431_at   | 1641618_at   | 1632225_a_at | 1628990_at   | 1640813_at   |
| 1633370_s_at | 1633948_a_at | 1627507_at   | 1625075_at   | 1639985_s_at | 1627509_s_at |
| 1640241_at   | 1632667_s_at | 1626056_a_at | 1631243_s_at | 1626208_at   | 1624165_a_at |
| 1632440_at   | 1634704_at   | 1628014_at   | 1633775_at   | 1636493_at   | 1641104_s_at |
| 1636608_at   | 1628143_a_at | 1639635_s_at | 1625838_at   | 1625034_s_at | 1638963_s_at |
| 1633483_a_at | 1624533_s_at | 1636728_at   | 1634351_at   | 1630502_at   | 1633476_at   |
| 1628284_at   | 1633681_at   | 1622932_s_at | 1629961_s_at | 1627645_at   | 1630886_at   |
| 1634890_at   | 1640007_at   | 1629030_a_at | 1626174_a_at | 1633422_a_at | 1634562_s_at |
| 1628671_a_at | 1624109_s_at | 1627588_at   | 1633852_at   | 1640736_at   | 1641303_at   |
| 1631340_at   | 1627420_s_at | 1632160_s_at | 1638051_at   | 1626528_at   | 1638063_at   |
| 1634043_at   | 1626033_at   | 1640672_at   | 1622973_at   | 1625065_s_at | 1631183_at   |
| 1633729_a_at | 1623043_s_at | 1641544_at   | 1640767_s_at | 1630506_at   | 1633081_at   |
| 1639171_at   | 1630055_a_at | 1628498_at   | 1633973_at   | 1639584_at   | 1638875_at   |
| 1625843_s_at | 1640386_at   | 1623648_s_at | 1624727_s_at | 1626184_at   | 1636496_at   |
| 1638447_s_at | 1635393_s_at | 1626980_at   | 1637770_a_at | 1624608_s_at | 1640060_at   |
| 1632961_at   | 1628861_at   | 1630113_at   | 1631435_at   | 1639825_at   | 1629877_at   |
| 1633112_at   | 1638416_at   | 1632211_at   | 1625981_at   | 1632618_a_at | 1624970_s_at |

|              |              |              |              |              |              |
|--------------|--------------|--------------|--------------|--------------|--------------|
| 1636673_s_at | 1628888_at   | 1640659_s_at | 1627114_at   | 1636301_s_at | 1634674_at   |
| 1636423_at   | 1636530_s_at | 1625515_a_at | 1635363_a_at | 1632297_at   | 1625110_at   |
| 1626320_at   | 1631145_at   | 1630306_at   | 1624119_at   | 1632678_at   | 1629990_at   |
| 1624237_at   | 1627592_at   | 1623761_at   | 1636946_at   | 1630650_at   | 1640416_at   |
| 1634913_s_at | 1625362_at   | 1629266_s_at | 1623048_a_at | 1632129_a_at | 1631473_at   |
| 1639897_at   | 1632287_at   | 1640567_at   | 1633846_at   | 1628493_at   | 1640130_at   |
| 1628691_at   | 1629658_at   | 1636332_at   | 1626237_at   | 1640968_a_at | 1629168_s_at |
| 1629898_s_at | 1634184_a_at | 1634944_at   | 1639766_at   | 1637826_at   | 1628482_at   |
| 1625985_at   | 1632120_at   | 1641231_at   | 1634084_at   | 1635444_at   | 1628155_at   |
| 1630224_at   | 1626751_at   | 1635109_at   | 1640332_at   | 1626099_s_at | 1639117_a_at |
| 1629150_at   | 1628629_at   | 1641074_s_at | 1633242_a_at | 1628931_at   | 1640288_s_at |
| 1623545_at   | 1636543_a_at | 1626239_at   | 1624481_a_at | 1639911_at   | 1635211_at   |
| 1639055_at   | 1626331_at   | 1623012_at   | 1625281_at   | 1641676_at   | 1634613_s_at |
| 1633115_a_at | 1633499_at   | 1638409_at   | 1627568_at   | 1627282_at   | 1628285_a_at |
| 1625691_at   | 1635103_at   | 1633386_s_at | 1635910_at   | 1624437_s_at | 1636344_at   |
| 1641496_a_at | 1634020_at   | 1628823_at   | 1626523_a_at | 1630764_at   | 1630320_at   |
| 1627668_s_at | 1641486_at   | 1639184_at   | 1624731_s_at | 1631718_at   | 1634699_a_at |
| 1639452_at   | 1634222_at   | 1634314_s_at | 1639984_at   | 1626874_at   | 1635224_s_at |
| 1640912_s_at | 1630824_a_at | 1623755_at   | 1638541_at   | 1636953_a_at | 1631798_s_at |
| 1632744_a_at | 1635491_s_at | 1639394_at   | 1639140_at   | 1624051_at   | 1637830_s_at |
| 1624212_at   | 1626090_at   | 1641206_at   | 1629248_at   | 1634218_at   | 1627872_at   |

|              |              |              |              |              |              |
|--------------|--------------|--------------|--------------|--------------|--------------|
| 1627764_at   | 1641368_at   | 1624569_at   | 1635818_at   | 1630983_s_at | 1638033_at   |
| 1624577_at   | 1635808_s_at | 1627354_at   | 1623216_s_at | 1638994_at   | 1628390_at   |
| 1628688_at   | 1637442_at   | 1630504_at   | 1637417_at   | 1625122_at   | 1628296_at   |
| 1632704_at   | 1636681_at   | 1623374_a_at | 1640112_at   | 1639434_at   | 1631121_at   |
| 1632278_s_at | 1636647_s_at | 1640284_at   | 1637706_at   | 1636244_s_at | 1634972_at   |
| 1627497_at   | 1633834_at   | 1634549_at   | 1635893_at   | 1639326_s_at | 1638377_x_at |
| 1638931_at   | 1630334_at   | 1626271_at   | 1632073_at   | 1628650_at   | 1641047_at   |
| 1639133_at   | 1632352_a_at | 1637771_s_at | 1627574_at   | 1634403_at   | 1635238_s_at |
| 1635589_at   | 1638612_at   | 1628008_a_at | 1637633_at   | 1627970_at   | 1636474_at   |
| 1630935_at   | 1628563_at   | 1624324_a_at | 1629442_at   | 1625102_at   | 1639743_s_at |
| 1640889_at   | 1634495_s_at | 1624726_s_at | 1633145_at   | 1635757_at   | 1627915_a_at |
| 1624908_at   | 1629020_s_at | 1636872_at   | 1622893_at   | 1632418_s_at | 1640363_a_at |
| 1623647_at   | 1634192_at   | 1632975_at   | 1628598_s_at | 1633714_at   | 1627456_s_at |
| 1632485_a_at | 1640970_at   | 1639671_at   | 1633759_s_at | 1636395_at   | 1637612_at   |
| 1637407_at   | 1639215_at   | 1629767_s_at | 1629357_s_at | 1629899_at   | 1640557_at   |
| 1626590_a_at | 1635943_s_at | 1628862_at   | 1624521_a_at | 1628453_at   | 1637913_at   |
| 1622946_at   | 1636791_s_at | 1626856_at   | 1629754_s_at | 1629080_at   | 1641330_at   |
| 1631118_s_at | 1633870_at   | 1637815_s_at | 1629732_at   | 1625727_at   | 1638783_at   |
| 1634878_at   | 1639047_at   | 1635041_at   | 1635329_at   | 1628377_s_at | 1631779_s_at |
| 1625638_a_at | 1623424_a_at | 1628150_a_at | 1630094_at   | 1634291_at   | 1625087_a_at |
| 1637342_s_at | 1632178_at   | 1624326_at   | 1640457_s_at | 1636703_at   | 1631579_a_at |

1634952\_s\_at

1640271\_s\_at

1641698\_at

1636639\_at

1641152\_at

1628952\_s\_at

\*\*\*\*\*

Lin Effects FDR < 0.1

|              |              |              |              |              |              |
|--------------|--------------|--------------|--------------|--------------|--------------|
| 1622894_at   | 1623154_a_at | 1623502_at   | 1623698_s_at | 1624027_at   | 1624272_at   |
| 1622909_at   | 1623201_at   | 1623505_s_at | 1623737_a_at | 1624042_at   | 1624273_at   |
| 1622915_at   | 1623203_at   | 1623510_at   | 1623766_at   | 1624054_at   | 1624277_at   |
| 1622921_at   | 1623251_at   | 1623513_at   | 1623770_at   | 1624069_at   | 1624300_s_at |
| 1622970_at   | 1623256_at   | 1623518_s_at | 1623782_at   | 1624083_s_at | 1624332_s_at |
| 1622973_at   | 1623264_at   | 1623540_at   | 1623785_a_at | 1624099_at   | 1624347_s_at |
| 1623027_s_at | 1623267_at   | 1623543_at   | 1623789_at   | 1624101_at   | 1624363_at   |
| 1623028_at   | 1623268_a_at | 1623552_s_at | 1623817_at   | 1624117_at   | 1624389_at   |
| 1623036_a_at | 1623281_s_at | 1623591_a_at | 1623819_at   | 1624135_at   | 1624395_at   |
| 1623040_at   | 1623285_at   | 1623631_at   | 1623826_at   | 1624149_at   | 1624444_at   |
| 1623058_at   | 1623306_at   | 1623633_at   | 1623849_s_at | 1624156_at   | 1624457_at   |
| 1623080_at   | 1623333_a_at | 1623645_a_at | 1623863_a_at | 1624165_a_at | 1624464_s_at |
| 1623088_at   | 1623335_a_at | 1623662_at   | 1623864_at   | 1624173_at   | 1624480_at   |
| 1623094_at   | 1623353_at   | 1623666_at   | 1623885_at   | 1624186_at   | 1624481_a_at |
| 1623097_at   | 1623357_at   | 1623669_at   | 1623900_a_at | 1624195_at   | 1624484_a_at |
| 1623113_at   | 1623436_a_at | 1623675_at   | 1623916_at   | 1624198_at   | 1624497_at   |
| 1623133_a_at | 1623455_s_at | 1623687_at   | 1623934_at   | 1624215_s_at | 1624503_at   |
| 1623134_at   | 1623486_at   | 1623689_a_at | 1623998_at   | 1624252_s_at | 1624510_at   |
| 1623150_at   | 1623498_at   | 1623695_a_at | 1624015_at   | 1624263_at   | 1624521_a_at |

|              |              |              |              |              |              |
|--------------|--------------|--------------|--------------|--------------|--------------|
| 1624533_s_at | 1624755_a_at | 1625008_at   | 1625212_at   | 1625405_at   | 1625648_at   |
| 1624535_at   | 1624756_at   | 1625048_at   | 1625235_at   | 1625422_at   | 1625657_at   |
| 1624539_at   | 1624757_at   | 1625050_s_at | 1625243_a_at | 1625434_at   | 1625658_at   |
| 1624555_at   | 1624772_at   | 1625065_s_at | 1625250_at   | 1625439_at   | 1625665_at   |
| 1624569_at   | 1624775_at   | 1625099_at   | 1625280_at   | 1625462_s_at | 1625685_at   |
| 1624577_at   | 1624782_a_at | 1625102_at   | 1625284_at   | 1625487_at   | 1625697_at   |
| 1624580_at   | 1624795_at   | 1625114_at   | 1625295_at   | 1625499_at   | 1625700_a_at |
| 1624581_at   | 1624815_at   | 1625120_at   | 1625304_s_at | 1625512_s_at | 1625727_at   |
| 1624583_at   | 1624847_at   | 1625129_at   | 1625314_at   | 1625514_s_at | 1625742_at   |
| 1624589_a_at | 1624863_a_at | 1625134_at   | 1625323_at   | 1625517_at   | 1625744_at   |
| 1624603_at   | 1624864_s_at | 1625137_at   | 1625325_s_at | 1625537_at   | 1625755_at   |
| 1624618_at   | 1624869_at   | 1625144_at   | 1625330_at   | 1625544_s_at | 1625770_at   |
| 1624627_s_at | 1624892_s_at | 1625162_at   | 1625338_at   | 1625572_s_at | 1625793_at   |
| 1624629_at   | 1624908_at   | 1625163_at   | 1625348_s_at | 1625589_at   | 1625801_s_at |
| 1624665_at   | 1624929_at   | 1625164_at   | 1625358_s_at | 1625595_a_at | 1625806_at   |
| 1624668_s_at | 1624935_at   | 1625165_at   | 1625359_at   | 1625613_at   | 1625826_at   |
| 1624678_at   | 1624953_at   | 1625166_at   | 1625362_at   | 1625617_at   | 1625829_a_at |
| 1624683_at   | 1624957_a_at | 1625184_at   | 1625374_at   | 1625631_at   | 1625850_at   |
| 1624688_at   | 1624966_at   | 1625185_at   | 1625375_at   | 1625640_a_at | 1625857_at   |
| 1624692_at   | 1624971_at   | 1625193_at   | 1625388_at   | 1625644_at   | 1625860_s_at |
| 1624717_s_at | 1624993_at   | 1625211_s_at | 1625393_s_at | 1625646_at   | 1625862_x_at |

|              |              |              |              |              |              |
|--------------|--------------|--------------|--------------|--------------|--------------|
| 1625863_at   | 1626138_s_at | 1626344_at   | 1626584_a_at | 1626850_s_at | 1627120_at   |
| 1625887_at   | 1626147_s_at | 1626350_at   | 1626588_a_at | 1626856_at   | 1627144_at   |
| 1625898_s_at | 1626148_at   | 1626352_at   | 1626596_at   | 1626857_at   | 1627167_a_at |
| 1625913_at   | 1626154_at   | 1626385_s_at | 1626609_at   | 1626864_at   | 1627172_s_at |
| 1625922_a_at | 1626156_at   | 1626396_s_at | 1626641_s_at | 1626881_at   | 1627189_a_at |
| 1625954_at   | 1626168_at   | 1626399_at   | 1626650_at   | 1626906_at   | 1627246_at   |
| 1625967_s_at | 1626175_at   | 1626407_at   | 1626679_at   | 1626933_s_at | 1627287_at   |
| 1625972_at   | 1626198_at   | 1626412_at   | 1626699_at   | 1626947_s_at | 1627288_a_at |
| 1625985_at   | 1626201_at   | 1626414_at   | 1626701_at   | 1626963_at   | 1627297_at   |
| 1625986_at   | 1626217_at   | 1626433_at   | 1626707_a_at | 1626972_at   | 1627301_s_at |
| 1625990_at   | 1626251_at   | 1626435_at   | 1626718_at   | 1627009_at   | 1627327_at   |
| 1625994_a_at | 1626257_at   | 1626482_a_at | 1626734_at   | 1627014_a_at | 1627330_at   |
| 1626007_at   | 1626261_s_at | 1626492_s_at | 1626740_at   | 1627041_s_at | 1627340_at   |
| 1626039_at   | 1626289_at   | 1626497_at   | 1626745_at   | 1627047_at   | 1627343_a_at |
| 1626056_a_at | 1626307_at   | 1626503_at   | 1626749_a_at | 1627068_at   | 1627376_at   |
| 1626074_at   | 1626315_at   | 1626524_at   | 1626781_at   | 1627078_at   | 1627405_at   |
| 1626079_a_at | 1626320_at   | 1626536_at   | 1626812_at   | 1627093_at   | 1627432_at   |
| 1626086_at   | 1626324_at   | 1626540_at   | 1626813_at   | 1627100_s_at | 1627436_s_at |
| 1626094_at   | 1626326_at   | 1626552_at   | 1626820_at   | 1627102_at   | 1627448_at   |
| 1626112_at   | 1626334_at   | 1626565_at   | 1626832_at   | 1627114_at   | 1627459_at   |
| 1626124_at   | 1626340_at   | 1626577_at   | 1626841_s_at | 1627118_at   | 1627460_at   |

|              |              |              |              |              |              |
|--------------|--------------|--------------|--------------|--------------|--------------|
| 1627470_at   | 1627779_at   | 1628030_at   | 1628309_at   | 1628494_a_at | 1628686_a_at |
| 1627473_at   | 1627807_at   | 1628040_at   | 1628320_at   | 1628500_at   | 1628716_at   |
| 1627495_at   | 1627829_at   | 1628053_at   | 1628328_at   | 1628507_at   | 1628719_at   |
| 1627498_at   | 1627832_at   | 1628080_at   | 1628332_at   | 1628539_at   | 1628726_s_at |
| 1627507_at   | 1627840_a_at | 1628083_at   | 1628339_a_at | 1628550_a_at | 1628734_at   |
| 1627552_at   | 1627844_at   | 1628092_at   | 1628360_at   | 1628558_at   | 1628743_at   |
| 1627565_at   | 1627847_s_at | 1628100_at   | 1628362_s_at | 1628578_at   | 1628744_s_at |
| 1627574_at   | 1627861_s_at | 1628129_a_at | 1628363_at   | 1628581_at   | 1628754_s_at |
| 1627598_at   | 1627881_at   | 1628131_at   | 1628364_at   | 1628599_at   | 1628759_a_at |
| 1627620_at   | 1627890_at   | 1628149_a_at | 1628404_at   | 1628605_at   | 1628760_at   |
| 1627633_at   | 1627895_at   | 1628152_at   | 1628420_s_at | 1628608_at   | 1628763_at   |
| 1627640_at   | 1627910_s_at | 1628173_at   | 1628428_at   | 1628611_at   | 1628764_at   |
| 1627656_at   | 1627938_at   | 1628202_at   | 1628432_at   | 1628617_at   | 1628798_at   |
| 1627657_at   | 1627939_a_at | 1628214_at   | 1628444_at   | 1628618_at   | 1628818_at   |
| 1627660_a_at | 1627959_a_at | 1628231_at   | 1628446_at   | 1628632_at   | 1628821_at   |
| 1627662_at   | 1627964_s_at | 1628237_s_at | 1628469_a_at | 1628643_at   | 1628828_s_at |
| 1627679_at   | 1627971_s_at | 1628257_s_at | 1628475_at   | 1628646_at   | 1628854_at   |
| 1627682_at   | 1627973_s_at | 1628264_a_at | 1628487_s_at | 1628648_at   | 1628862_at   |
| 1627702_at   | 1627982_at   | 1628268_at   | 1628488_at   | 1628670_at   | 1628882_at   |
| 1627761_at   | 1628000_s_at | 1628272_a_at | 1628492_at   | 1628675_at   | 1628909_at   |
| 1627773_a_at | 1628018_at   | 1628282_at   | 1628493_at   | 1628681_at   | 1628922_s_at |



|              |              |              |              |              |              |
|--------------|--------------|--------------|--------------|--------------|--------------|
| 1628931_at   | 1629233_s_at | 1629468_at   | 1629718_at   | 1630212_at   | 1630429_s_at |
| 1628946_at   | 1629243_at   | 1629469_s_at | 1629766_at   | 1630227_a_at | 1630453_at   |
| 1628947_s_at | 1629250_at   | 1629476_at   | 1629788_at   | 1630236_s_at | 1630467_a_at |
| 1628977_at   | 1629257_s_at | 1629479_a_at | 1629806_a_at | 1630241_at   | 1630469_a_at |
| 1628984_s_at | 1629271_at   | 1629487_at   | 1629853_at   | 1630242_at   | 1630483_a_at |
| 1629009_at   | 1629285_at   | 1629496_at   | 1629875_a_at | 1630256_at   | 1630504_at   |
| 1629072_at   | 1629307_s_at | 1629510_at   | 1629897_a_at | 1630260_at   | 1630520_s_at |
| 1629078_s_at | 1629308_at   | 1629515_at   | 1629936_at   | 1630263_at   | 1630539_at   |
| 1629083_at   | 1629327_at   | 1629520_at   | 1629972_at   | 1630302_at   | 1630590_at   |
| 1629095_a_at | 1629363_at   | 1629565_s_at | 1630003_at   | 1630306_at   | 1630605_at   |
| 1629098_at   | 1629367_at   | 1629625_at   | 1630005_at   | 1630323_at   | 1630606_at   |
| 1629106_at   | 1629374_at   | 1629629_at   | 1630008_at   | 1630329_at   | 1630635_s_at |
| 1629113_a_at | 1629377_at   | 1629632_at   | 1630024_at   | 1630335_s_at | 1630641_at   |
| 1629144_at   | 1629382_at   | 1629633_at   | 1630067_a_at | 1630359_at   | 1630643_at   |
| 1629153_s_at | 1629395_at   | 1629642_a_at | 1630113_at   | 1630363_at   | 1630680_at   |
| 1629160_s_at | 1629396_a_at | 1629644_s_at | 1630130_at   | 1630365_at   | 1630685_at   |
| 1629168_s_at | 1629401_s_at | 1629661_at   | 1630153_a_at | 1630393_a_at | 1630699_at   |
| 1629189_at   | 1629413_at   | 1629670_at   | 1630173_a_at | 1630407_at   | 1630713_at   |
| 1629199_at   | 1629427_at   | 1629685_at   | 1630206_at   | 1630416_at   | 1630723_a_at |
| 1629207_at   | 1629442_at   | 1629698_at   | 1630208_at   | 1630421_at   | 1630724_at   |
| 1629227_at   | 1629464_a_at | 1629705_at   | 1630209_at   | 1630422_at   | 1630735_at   |

|              |              |              |              |              |              |
|--------------|--------------|--------------|--------------|--------------|--------------|
| 1630761_at   | 1631030_at   | 1631304_a_at | 1631525_at   | 1631873_at   | 1632196_at   |
| 1630763_at   | 1631040_at   | 1631307_at   | 1631526_s_at | 1631891_at   | 1632198_at   |
| 1630771_s_at | 1631046_s_at | 1631313_at   | 1631561_s_at | 1631915_at   | 1632202_at   |
| 1630773_a_at | 1631055_at   | 1631316_a_at | 1631565_a_at | 1631942_at   | 1632207_a_at |
| 1630778_at   | 1631058_s_at | 1631319_at   | 1631568_a_at | 1631971_at   | 1632212_at   |
| 1630780_a_at | 1631059_at   | 1631325_at   | 1631573_a_at | 1631984_at   | 1632228_at   |
| 1630781_at   | 1631083_at   | 1631354_x_at | 1631578_s_at | 1632003_a_at | 1632232_at   |
| 1630802_at   | 1631090_a_at | 1631359_s_at | 1631584_at   | 1632021_at   | 1632236_at   |
| 1630807_at   | 1631094_s_at | 1631371_s_at | 1631603_at   | 1632041_s_at | 1632258_s_at |
| 1630821_at   | 1631128_s_at | 1631374_at   | 1631622_at   | 1632055_at   | 1632261_at   |
| 1630825_at   | 1631137_at   | 1631399_a_at | 1631633_a_at | 1632057_at   | 1632280_at   |
| 1630841_at   | 1631142_a_at | 1631405_at   | 1631663_at   | 1632065_at   | 1632297_at   |
| 1630842_s_at | 1631161_at   | 1631417_s_at | 1631723_at   | 1632103_at   | 1632317_at   |
| 1630870_s_at | 1631204_at   | 1631420_at   | 1631728_s_at | 1632114_at   | 1632319_at   |
| 1630877_a_at | 1631208_at   | 1631426_at   | 1631733_at   | 1632120_at   | 1632335_at   |
| 1630953_at   | 1631209_at   | 1631430_at   | 1631745_at   | 1632139_at   | 1632338_a_at |
| 1630958_at   | 1631213_at   | 1631456_at   | 1631776_at   | 1632146_a_at | 1632342_a_at |
| 1630983_s_at | 1631214_at   | 1631469_at   | 1631779_s_at | 1632185_s_at | 1632343_at   |
| 1630990_at   | 1631227_at   | 1631477_a_at | 1631784_at   | 1632188_at   | 1632361_at   |
| 1630996_s_at | 1631244_a_at | 1631479_at   | 1631800_at   | 1632194_at   | 1632367_at   |
| 1631024_s_at | 1631303_s_at | 1631515_at   | 1631806_at   | 1632195_at   | 1632373_s_at |

|              |              |              |              |              |              |
|--------------|--------------|--------------|--------------|--------------|--------------|
| 1632387_at   | 1632658_a_at | 1632836_at   | 1633154_at   | 1633471_at   | 1633649_s_at |
| 1632390_at   | 1632695_at   | 1632855_at   | 1633191_at   | 1633480_at   | 1633654_s_at |
| 1632400_at   | 1632705_at   | 1632872_at   | 1633225_at   | 1633487_at   | 1633658_a_at |
| 1632409_a_at | 1632710_s_at | 1632874_at   | 1633233_a_at | 1633497_s_at | 1633687_at   |
| 1632417_a_at | 1632712_s_at | 1632883_at   | 1633237_at   | 1633501_s_at | 1633707_at   |
| 1632420_at   | 1632724_at   | 1632927_at   | 1633266_at   | 1633505_at   | 1633709_at   |
| 1632421_at   | 1632731_at   | 1632932_a_at | 1633268_s_at | 1633512_at   | 1633727_s_at |
| 1632431_s_at | 1632732_at   | 1632936_at   | 1633287_at   | 1633523_at   | 1633731_at   |
| 1632446_at   | 1632751_at   | 1632986_a_at | 1633293_at   | 1633532_at   | 1633755_at   |
| 1632462_at   | 1632753_a_at | 1632989_a_at | 1633305_at   | 1633540_at   | 1633765_at   |
| 1632478_a_at | 1632755_at   | 1633002_at   | 1633320_at   | 1633556_s_at | 1633778_at   |
| 1632479_at   | 1632758_at   | 1633026_a_at | 1633333_a_at | 1633563_at   | 1633779_s_at |
| 1632492_at   | 1632762_s_at | 1633036_s_at | 1633353_s_at | 1633568_s_at | 1633780_at   |
| 1632510_at   | 1632771_at   | 1633060_at   | 1633362_at   | 1633573_a_at | 1633784_at   |
| 1632517_at   | 1632782_a_at | 1633067_at   | 1633378_at   | 1633599_a_at | 1633846_at   |
| 1632532_s_at | 1632794_a_at | 1633086_s_at | 1633380_at   | 1633606_s_at | 1633856_at   |
| 1632568_at   | 1632802_at   | 1633099_at   | 1633415_at   | 1633612_at   | 1633857_at   |
| 1632586_at   | 1632809_at   | 1633106_at   | 1633422_a_at | 1633631_at   | 1633886_at   |
| 1632605_at   | 1632818_at   | 1633111_at   | 1633448_at   | 1633641_a_at | 1633914_at   |
| 1632640_at   | 1632821_a_at | 1633112_at   | 1633457_at   | 1633642_at   | 1633915_at   |
| 1632656_at   | 1632835_at   | 1633131_s_at | 1633467_a_at | 1633645_at   | 1633947_at   |

|              |              |              |              |              |              |
|--------------|--------------|--------------|--------------|--------------|--------------|
| 1633949_at   | 1634182_at   | 1634474_s_at | 1634658_a_at | 1634940_at   | 1635221_at   |
| 1633957_s_at | 1634193_at   | 1634490_at   | 1634664_at   | 1634960_at   | 1635223_at   |
| 1633959_s_at | 1634197_at   | 1634495_s_at | 1634667_at   | 1634962_s_at | 1635233_at   |
| 1633967_at   | 1634209_at   | 1634496_at   | 1634684_at   | 1634971_at   | 1635248_at   |
| 1633975_s_at | 1634219_a_at | 1634509_s_at | 1634687_at   | 1634978_at   | 1635267_s_at |
| 1633997_s_at | 1634240_at   | 1634512_at   | 1634693_at   | 1634979_at   | 1635271_at   |
| 1633998_s_at | 1634241_at   | 1634514_at   | 1634704_at   | 1635003_at   | 1635290_at   |
| 1634013_at   | 1634269_at   | 1634515_at   | 1634705_at   | 1635007_at   | 1635293_s_at |
| 1634014_at   | 1634295_at   | 1634528_at   | 1634713_at   | 1635008_at   | 1635294_at   |
| 1634020_at   | 1634315_a_at | 1634541_a_at | 1634742_at   | 1635013_s_at | 1635305_s_at |
| 1634029_at   | 1634321_s_at | 1634550_at   | 1634750_at   | 1635033_at   | 1635321_at   |
| 1634053_at   | 1634351_at   | 1634551_at   | 1634786_at   | 1635080_at   | 1635329_at   |
| 1634072_s_at | 1634373_a_at | 1634553_at   | 1634804_at   | 1635086_at   | 1635343_a_at |
| 1634076_at   | 1634393_s_at | 1634563_at   | 1634809_s_at | 1635088_at   | 1635361_at   |
| 1634102_at   | 1634396_at   | 1634573_a_at | 1634815_at   | 1635089_at   | 1635363_a_at |
| 1634113_at   | 1634401_at   | 1634592_at   | 1634823_at   | 1635109_at   | 1635365_at   |
| 1634117_at   | 1634429_at   | 1634594_at   | 1634861_at   | 1635137_a_at | 1635370_at   |
| 1634131_s_at | 1634430_at   | 1634625_at   | 1634878_at   | 1635153_at   | 1635379_at   |
| 1634143_at   | 1634433_at   | 1634630_at   | 1634883_at   | 1635203_at   | 1635385_at   |
| 1634144_at   | 1634443_a_at | 1634633_s_at | 1634904_s_at | 1635205_at   | 1635422_s_at |
| 1634165_at   | 1634460_at   | 1634650_at   | 1634922_s_at | 1635211_at   | 1635426_at   |

|              |              |              |              |              |              |
|--------------|--------------|--------------|--------------|--------------|--------------|
| 1635428_at   | 1635647_at   | 1635881_at   | 1636154_at   | 1636322_at   | 1636564_at   |
| 1635435_at   | 1635654_at   | 1635886_s_at | 1636168_s_at | 1636337_s_at | 1636567_at   |
| 1635444_at   | 1635666_at   | 1635893_at   | 1636170_at   | 1636341_at   | 1636575_s_at |
| 1635447_at   | 1635667_at   | 1635897_at   | 1636173_s_at | 1636343_at   | 1636583_at   |
| 1635454_a_at | 1635695_at   | 1635903_at   | 1636174_at   | 1636373_at   | 1636594_at   |
| 1635481_a_at | 1635701_at   | 1635936_at   | 1636193_at   | 1636375_at   | 1636606_at   |
| 1635492_at   | 1635706_at   | 1635939_a_at | 1636198_at   | 1636410_at   | 1636620_s_at |
| 1635500_a_at | 1635724_at   | 1635947_at   | 1636202_s_at | 1636412_at   | 1636647_s_at |
| 1635502_at   | 1635728_a_at | 1635950_at   | 1636205_at   | 1636423_at   | 1636656_at   |
| 1635513_at   | 1635729_a_at | 1635951_at   | 1636207_at   | 1636442_at   | 1636674_at   |
| 1635521_at   | 1635769_at   | 1635970_at   | 1636217_at   | 1636445_at   | 1636694_at   |
| 1635525_at   | 1635774_at   | 1635973_at   | 1636219_at   | 1636446_at   | 1636695_at   |
| 1635527_at   | 1635800_at   | 1635980_s_at | 1636240_at   | 1636460_at   | 1636703_at   |
| 1635530_at   | 1635808_s_at | 1636006_at   | 1636244_s_at | 1636464_at   | 1636705_at   |
| 1635549_at   | 1635813_at   | 1636020_s_at | 1636245_at   | 1636473_at   | 1636743_s_at |
| 1635552_s_at | 1635828_at   | 1636038_at   | 1636248_at   | 1636474_at   | 1636766_at   |
| 1635581_at   | 1635840_s_at | 1636059_at   | 1636255_s_at | 1636493_at   | 1636767_at   |
| 1635588_at   | 1635849_at   | 1636064_at   | 1636257_at   | 1636498_at   | 1636769_at   |
| 1635589_at   | 1635861_a_at | 1636123_at   | 1636275_a_at | 1636539_at   | 1636775_at   |
| 1635607_at   | 1635868_at   | 1636140_at   | 1636308_at   | 1636556_at   | 1636777_at   |
| 1635645_at   | 1635878_s_at | 1636149_at   | 1636311_at   | 1636557_a_at | 1636781_at   |

|              |              |              |              |              |              |
|--------------|--------------|--------------|--------------|--------------|--------------|
| 1636795_at   | 1637107_at   | 1637321_at   | 1637575_at   | 1637843_at   | 1638119_at   |
| 1636798_at   | 1637111_a_at | 1637346_at   | 1637587_at   | 1637872_at   | 1638127_s_at |
| 1636811_at   | 1637118_at   | 1637352_a_at | 1637598_at   | 1637873_at   | 1638143_a_at |
| 1636816_s_at | 1637127_at   | 1637366_at   | 1637612_at   | 1637897_at   | 1638158_at   |
| 1636829_at   | 1637128_a_at | 1637378_s_at | 1637620_s_at | 1637899_at   | 1638174_at   |
| 1636843_a_at | 1637129_at   | 1637386_at   | 1637627_at   | 1637900_at   | 1638176_at   |
| 1636845_at   | 1637141_at   | 1637393_at   | 1637632_at   | 1637942_at   | 1638185_at   |
| 1636848_at   | 1637175_at   | 1637398_a_at | 1637647_at   | 1637954_at   | 1638225_a_at |
| 1636877_at   | 1637189_at   | 1637403_at   | 1637648_at   | 1637960_at   | 1638226_at   |
| 1636894_s_at | 1637191_at   | 1637417_at   | 1637649_at   | 1637963_at   | 1638246_at   |
| 1636918_a_at | 1637192_at   | 1637429_at   | 1637662_at   | 1637969_at   | 1638259_s_at |
| 1636926_s_at | 1637255_a_at | 1637461_at   | 1637669_at   | 1637973_a_at | 1638265_s_at |
| 1636943_s_at | 1637269_at   | 1637466_at   | 1637679_s_at | 1637983_s_at | 1638277_at   |
| 1636948_a_at | 1637271_a_at | 1637469_at   | 1637689_at   | 1638009_s_at | 1638282_at   |
| 1636950_at   | 1637284_at   | 1637481_at   | 1637713_at   | 1638011_a_at | 1638296_at   |
| 1636995_at   | 1637291_at   | 1637499_s_at | 1637717_at   | 1638020_at   | 1638312_at   |
| 1637007_s_at | 1637307_at   | 1637513_at   | 1637733_at   | 1638053_at   | 1638321_s_at |
| 1637008_at   | 1637309_a_at | 1637515_s_at | 1637773_s_at | 1638080_at   | 1638335_at   |
| 1637027_s_at | 1637314_at   | 1637518_at   | 1637780_a_at | 1638092_a_at | 1638342_at   |
| 1637079_at   | 1637317_at   | 1637551_at   | 1637815_s_at | 1638100_s_at | 1638343_at   |
| 1637097_at   | 1637319_at   | 1637557_a_at | 1637826_at   | 1638112_at   | 1638361_at   |

|              |              |              |              |              |              |
|--------------|--------------|--------------|--------------|--------------|--------------|
| 1638411_at   | 1638716_a_at | 1638981_at   | 1639265_at   | 1639579_s_at | 1639856_at   |
| 1638445_a_at | 1638758_at   | 1639040_s_at | 1639268_at   | 1639584_at   | 1639862_at   |
| 1638447_s_at | 1638763_at   | 1639046_at   | 1639286_s_at | 1639594_at   | 1639868_at   |
| 1638469_s_at | 1638770_a_at | 1639072_at   | 1639323_at   | 1639611_at   | 1639874_at   |
| 1638499_s_at | 1638782_at   | 1639075_a_at | 1639346_at   | 1639621_at   | 1639891_at   |
| 1638523_at   | 1638807_s_at | 1639079_at   | 1639361_a_at | 1639622_at   | 1639898_at   |
| 1638526_a_at | 1638809_at   | 1639111_at   | 1639366_at   | 1639640_at   | 1639903_at   |
| 1638539_at   | 1638811_at   | 1639138_at   | 1639374_s_at | 1639653_at   | 1639911_at   |
| 1638544_at   | 1638816_at   | 1639139_a_at | 1639377_at   | 1639663_at   | 1639913_at   |
| 1638592_at   | 1638833_at   | 1639148_at   | 1639383_a_at | 1639665_at   | 1639927_at   |
| 1638603_at   | 1638846_at   | 1639171_at   | 1639400_at   | 1639667_at   | 1639932_at   |
| 1638619_s_at | 1638852_at   | 1639179_at   | 1639410_at   | 1639683_at   | 1639937_at   |
| 1638635_at   | 1638875_at   | 1639198_at   | 1639411_at   | 1639692_s_at | 1639972_at   |
| 1638642_at   | 1638884_at   | 1639202_a_at | 1639421_at   | 1639721_at   | 1639974_a_at |
| 1638649_at   | 1638903_at   | 1639203_at   | 1639424_at   | 1639737_at   | 1639982_at   |
| 1638652_at   | 1638919_at   | 1639211_at   | 1639461_a_at | 1639748_at   | 1639993_at   |
| 1638667_a_at | 1638923_at   | 1639215_at   | 1639494_at   | 1639757_at   | 1640006_at   |
| 1638670_a_at | 1638930_s_at | 1639222_at   | 1639519_at   | 1639762_at   | 1640020_at   |
| 1638699_at   | 1638963_s_at | 1639236_at   | 1639527_at   | 1639787_at   | 1640066_at   |
| 1638708_s_at | 1638973_s_at | 1639255_s_at | 1639566_s_at | 1639816_at   | 1640082_at   |
| 1638709_at   | 1638974_at   | 1639264_at   | 1639567_at   | 1639842_at   | 1640101_at   |

|              |              |              |              |              |              |
|--------------|--------------|--------------|--------------|--------------|--------------|
| 1640109_at   | 1640318_at   | 1640540_at   | 1640781_a_at | 1641179_at   | 1641370_s_at |
| 1640112_at   | 1640333_at   | 1640552_at   | 1640782_at   | 1641189_a_at | 1641378_at   |
| 1640130_at   | 1640335_at   | 1640555_at   | 1640825_a_at | 1641191_s_at | 1641390_at   |
| 1640134_a_at | 1640336_at   | 1640567_at   | 1640827_at   | 1641212_a_at | 1641399_at   |
| 1640158_at   | 1640341_s_at | 1640584_at   | 1640883_a_at | 1641236_s_at | 1641403_at   |
| 1640162_at   | 1640351_s_at | 1640590_at   | 1640886_a_at | 1641241_at   | 1641412_at   |
| 1640167_s_at | 1640355_at   | 1640621_at   | 1640917_at   | 1641252_at   | 1641420_s_at |
| 1640169_s_at | 1640365_s_at | 1640661_at   | 1640918_at   | 1641256_at   | 1641424_at   |
| 1640185_at   | 1640379_s_at | 1640695_at   | 1640952_at   | 1641262_at   | 1641427_at   |
| 1640191_a_at | 1640380_a_at | 1640713_at   | 1640980_at   | 1641270_at   | 1641445_s_at |
| 1640212_at   | 1640425_at   | 1640714_at   | 1640991_at   | 1641278_at   | 1641458_s_at |
| 1640215_at   | 1640426_at   | 1640720_a_at | 1640999_at   | 1641285_at   | 1641461_at   |
| 1640216_at   | 1640445_at   | 1640732_s_at | 1641011_at   | 1641303_at   | 1641469_at   |
| 1640220_a_at | 1640451_at   | 1640734_a_at | 1641038_at   | 1641306_at   | 1641478_s_at |
| 1640228_at   | 1640486_s_at | 1640744_a_at | 1641058_at   | 1641309_s_at | 1641479_at   |
| 1640242_s_at | 1640492_at   | 1640746_at   | 1641065_s_at | 1641320_s_at | 1641481_at   |
| 1640244_at   | 1640497_at   | 1640754_at   | 1641105_at   | 1641324_at   | 1641486_at   |
| 1640257_at   | 1640504_at   | 1640755_at   | 1641115_at   | 1641330_at   | 1641496_a_at |
| 1640265_a_at | 1640507_s_at | 1640759_at   | 1641129_at   | 1641337_at   | 1641502_a_at |
| 1640301_a_at | 1640520_at   | 1640762_at   | 1641143_s_at | 1641341_at   | 1641522_at   |
| 1640303_a_at | 1640529_at   | 1640765_at   | 1641178_s_at | 1641350_at   | 1641530_s_at |



|              |              |              |            |              |              |
|--------------|--------------|--------------|------------|--------------|--------------|
| 1641537_s_at | 1641570_s_at | 1641603_s_at | 1641634_at | 1641664_at   | 1641711_at   |
| 1641540_a_at | 1641575_at   | 1641606_s_at | 1641642_at | 1641681_s_at | 1641715_at   |
| 1641541_a_at | 1641579_at   | 1641624_at   | 1641653_at | 1641701_at   | 1641745_a_at |
| 1641549_at   | 1641598_at   | 1641626_at   | 1641660_at | 1641704_at   |              |

\*\*\*\*\*

Dep Effects UP regulated FDR < 0.1

|              |              |              |              |              |              |
|--------------|--------------|--------------|--------------|--------------|--------------|
| 1623632_s_at | 1626566_at   | 1630968_at   | 1633727_s_at | 1636591_at   | 1638994_at   |
| 1623693_a_at | 1626575_at   | 1631225_at   | 1633965_at   | 1636682_at   | 1639321_s_at |
| 1623782_at   | 1626650_at   | 1631243_s_at | 1634034_at   | 1636867_s_at | 1639467_at   |
| 1624042_at   | 1627270_at   | 1631374_at   | 1634707_s_at | 1636896_a_at | 1639476_at   |
| 1624464_s_at | 1627280_s_at | 1631385_at   | 1634814_at   | 1637193_at   | 1639611_at   |
| 1624717_s_at | 1627376_at   | 1631426_at   | 1634869_at   | 1637229_a_at | 1639858_s_at |
| 1624943_at   | 1627651_a_at | 1631527_at   | 1634877_at   | 1637611_at   | 1640224_s_at |
| 1625199_s_at | 1627702_at   | 1632146_a_at | 1634904_s_at | 1637671_a_at | 1640296_a_at |
| 1625264_s_at | 1628172_at   | 1632234_at   | 1635202_s_at | 1637872_at   | 1640528_at   |
| 1625290_at   | 1629357_s_at | 1632623_at   | 1635581_at   | 1637940_s_at | 1640754_at   |
| 1625430_at   | 1629839_a_at | 1632916_at   | 1635618_at   | 1638050_s_at | 1640764_at   |
| 1625433_at   | 1629842_at   | 1633026_a_at | 1635619_a_at | 1638186_a_at | 1641126_at   |
| 1625830_a_at | 1629843_s_at | 1633069_s_at | 1635711_s_at | 1638290_at   | 1641233_a_at |
| 1625840_at   | 1630280_s_at | 1633391_at   | 1635904_s_at | 1638325_at   | 1641381_s_at |
| 1626178_s_at | 1630824_a_at | 1633563_at   | 1636423_at   | 1638727_at   | 1641506_at   |
| 1626385_s_at | 1630884_at   | 1633654_s_at | 1636521_at   | 1638875_at   |              |

\*\*\*\*\*

Dep Effects DOWN regulated FDR < 0.1

|              |              |              |              |              |              |
|--------------|--------------|--------------|--------------|--------------|--------------|
| 1622935_at   | 1625027_a_at | 1627888_at   | 1630929_at   | 1634672_at   | 1636762_a_at |
| 1623032_at   | 1625250_at   | 1628194_at   | 1631200_at   | 1634697_at   | 1636829_at   |
| 1623069_s_at | 1625351_at   | 1628296_at   | 1631627_at   | 1635065_at   | 1636921_at   |
| 1623607_at   | 1625375_at   | 1628376_x_at | 1631648_at   | 1635305_s_at | 1636948_a_at |
| 1623766_at   | 1625519_at   | 1628429_at   | 1631877_a_at | 1635491_s_at | 1637124_at   |
| 1623783_at   | 1625814_at   | 1628598_s_at | 1631909_at   | 1635765_at   | 1637392_at   |
| 1623928_at   | 1625954_at   | 1628634_at   | 1631998_at   | 1635769_at   | 1637465_at   |
| 1624158_at   | 1625991_s_at | 1628854_at   | 1632109_s_at | 1635821_at   | 1637547_at   |
| 1624185_at   | 1626075_at   | 1628938_at   | 1632318_at   | 1635871_at   | 1637778_a_at |
| 1624202_a_at | 1626222_at   | 1629117_at   | 1632374_at   | 1635983_a_at | 1638217_at   |
| 1624396_at   | 1626340_at   | 1629391_at   | 1632461_at   | 1635987_at   | 1638224_at   |
| 1624465_at   | 1626503_at   | 1629427_at   | 1632583_at   | 1636014_at   | 1638272_at   |
| 1624466_a_at | 1626811_at   | 1629464_a_at | 1632677_a_at | 1636131_at   | 1638335_at   |
| 1624560_at   | 1626832_at   | 1629476_at   | 1632695_at   | 1636142_at   | 1638350_at   |
| 1624699_s_at | 1627046_at   | 1629718_at   | 1632834_a_at | 1636257_at   | 1638695_at   |
| 1624818_s_at | 1627078_at   | 1629955_at   | 1633197_at   | 1636337_s_at | 1638833_at   |
| 1624840_at   | 1627459_at   | 1630131_at   | 1633463_s_at | 1636460_at   | 1638970_at   |
| 1624888_at   | 1627525_a_at | 1630335_s_at | 1633810_at   | 1636639_at   | 1639071_a_at |
| 1624984_at   | 1627552_at   | 1630408_s_at | 1634575_at   | 1636711_at   | 1639135_at   |

|            |            |              |              |              |            |
|------------|------------|--------------|--------------|--------------|------------|
| 1639152_at | 1639429_at | 1640241_at   | 1640635_a_at | 1641078_s_at | 1641630_at |
| 1639158_at | 1639762_at | 1640293_s_at | 1640824_at   | 1641201_at   |            |
| 1639341_at | 1639993_at | 1640332_at   | 1640826_at   | 1641568_a_at |            |

\*\*\*\*\*

Lin x Dep Effects FDR < 0.1

1632492\_at

1628404\_at
