# Supplementary material
Source: PubMed Central journal article supplement (PMC3430533)
Supplement: supp_112.142687_TableS1.pdf [file supp_112.142687_TableS1.pdf]

**Table S1**

| Category                                         | Cluster             | Classification  | Term's name                                          | Number of genes |
|--------------------------------------------------|---------------------|-----------------|------------------------------------------------------|-----------------|
| Inbreds up-regulated, protective configuration   | Cluster 1, ES: 2.25 | GOTERM_BP_FAT   | RNA processing                                       | 60              |
|                                                  |                     | KEGG_PATHWAY    | Spliceosome                                          | 40              |
|                                                  |                     | GOTERM_CC_FAT   | Small nuclear ribonucleoprotein complex              | 22              |
|                                                  | Cluster 2: ES: 2.04 | GOTERM_BP_FAT   | RNA localization                                     | 20              |
|                                                  |                     | GOTERM_BP_FAT   | Nucleocytoplasmic transport                          | 19              |
|                                                  |                     | GOTERM_BP_FAT   | mRNA export from nucleus                             | 11              |
|                                                  | Cluster 3: ES: 1.76 | GOTERM_CC_FAT   | Extracellular region                                 | 46              |
|                                                  |                     | UP_SEQ_FEATURE  | Signal peptide                                       | 44              |
|                                                  |                     | SP_PIR_KEYWORDS | Glycoprotein                                         | 25              |
|                                                  | Cluster 4, ES: 1.44 | GOTERM_BP_FAT   | Cell surface receptor linked signal transduction     | 24              |
|                                                  |                     | GOTERM_MF_FAT   | Hormone activity                                     | 16              |
|                                                  |                     | GOTERM_BP_FAT   | G-protein coupled receptor protein signaling pathway | 11              |
| Inbreds down-regulated, protective configuration | Cluster 1, ES: 2.36 | GOTERM_BP_FAT   | Phosphate metabolic process                          | 121             |
|                                                  |                     | GOTERM_CC_FAT   | Mitochondrion                                        | 116             |
|                                                  |                     | GOTERM_BP_FAT   | Energy derivation by oxidation of organic compounds  | 55              |
|                                                  | Cluster 2, ES: 2.03 | GOTERM_MF_FAT   | Nucleotide binding                                   | 149             |
|                                                  |                     | GOTERM_MF_FAT   | ATP binding                                          | 101             |
|                                                  |                     | INTERPRO        | Protein kinase, ATP binding site                     | 40              |
|                                                  | Cluster 3, ES: 1.44 | GOTERM_BP_FAT   | Protein amino acid phosphorylation                   | 50              |
|                                                  |                     | INTERPRO        | Serine/threonine protein kinase-related              | 35              |
|                                                  |                     | UP_SEQ_FEATURE  | Active site:Proton acceptor                          | 25              |

**Table S1 (cont.)**

|                                                    |                     |          |                         |   |
|----------------------------------------------------|---------------------|----------|-------------------------|---|
| Inbreds up-regulated, non-protective configuration | Cluster 1, ES: 1.35 | SMART    | JHBP                    | 5 |
|                                                    |                     | INTERPRO | Hormone binding         | 5 |
|                                                    |                     | INTERPRO | Odorant binding protein | 5 |

Cluster annotation analysis of the probe sets showing the most extreme Student's *t* values in the test of inbreds' vs. controls' expression (1846 and 1860 probes for the positive and negative *t* values respectively), using as background all probes in the same expression pattern. The lists of functional terms shown are not exhaustive, we chose three informative and less redundant terms in each cluster. No significant clusters were found in the analysis of down-regulated probes having non-protective configurations. ES: Enrichment Score.
