# Supplementary material
Source: PubMed Central journal article supplement (PMC3430533)
Supplement: supp_112.142687_TableS3.pdf [file supp_112.142687_TableS3.pdf]

**Table S3 Comparison with Sorensen et al. gene lists**

| Selected line            | In Sorensen's list | Expressed in this experiment | <i>Inb</i> effects         |        | <i>Inb</i> same dir.       |       | <i>Dep</i> effects          |       | <i>Dep</i> same dir.       |       |
|--------------------------|--------------------|------------------------------|----------------------------|--------|----------------------------|-------|-----------------------------|-------|----------------------------|-------|
|                          |                    |                              | OBS                        | EXP    | OBS                        | EXP   | OBS                         | EXP   | OBS                        | EXP   |
| Heat survival            | 94                 | 78                           | 28                         | 33.12  | 6                          | -     | 12                          | 12.76 | 5                          |       |
| Starvation               | 230                | 176                          | 74                         | 74.73  | 19                         | 22.20 | 20                          | 28.80 | 12                         | 11.80 |
| Longevity                | 64                 | 54                           | 27                         | 22.92  | 8                          | 8.10  | 9                           | 8.83  | 2                          | 5.31  |
| Heat knock down          | 21                 | 16                           | 4                          | 6.79   | 3                          | 2.80  | 8                           | 2.62  | 8                          | 3.28  |
| Dessication              | 262                | 154                          | 53                         | 65.39  | 20                         | 15.9  | 21                          | 25.20 | 11                         | 12.39 |
| Constant 30° C           | 12                 | 10                           | 4                          | 4.25   | 2                          | 3.00  | 0                           | 1.64  | 0                          | -     |
| Combined                 | 262                | 245                          | 108                        | 104.03 | 51                         | 75.6  | 46                          | 40.08 | 24                         | 18.86 |
| Goodness-of-fit $\chi^2$ |                    |                              | 4.82, $P = 0.566$ , 6 d.f. |        | 6.35, $P = 0.273$ , 5 d.f. |       | 17.44, $P = 0.008$ , 6 d.f. |       | 8.93, $P = 0.063$ , 4 d.f. |       |

Numbers of genes differentially expressed in the Sorensen et al. (2003) stress selection lines; number of these genes expressed in our experiment (only the counts in the *Inb* analysis lists are shown; the counts difference with the *Dep* analysis lists was never greater than two); of these, numbers showing *Inb* or *Dep* effects ( $P < 0.05$  in *t* test and ANOVA respectively); of these, numbers with expression changed in the same direction as in the Sorensen's et al experiment. The expected numbers of *Inb* and *Dep* effects genes were calculated as: number of Sorensen's et al. significant genes expressed in this experiment  $\times$  our overall proportion of genes showing *Inb* or *Dep* effects (0.42 and 0.16). The expected counts in the same direction were calculated using the number of expressed genes with *Inb* or *Dep* effects  $\times$  overall proportion of up- or down-regulated genes in our experiment (0.7 and 0.3 for *Inb* and 0.41 and 0.59 for *Dep*). All genes in each selected line list showed changes in the same direction, with the exception of Heat survival, for which we calculated no expected direction changes. Combined: genes differentially expressed in a joint analysis of all selected lines versus controls in Sorensen's et al. experiment.
